# Supplementary material for: Hydrogen Bond Directed ortho‐Selective C−H Borylation of Secondary Aromatic Amides
Source: PubMed Central journal article supplement — Angew Chem Int Ed Engl. 2019 Jul 17;58(37):13039–43. doi: 10.1002/anie.201907366 (PMC6772079; doi:10.1002/anie.201907366), 2019-07-17
Supplement: ANIE-58-13039-s001.pdf [file ANIE-58-13039-s001.pdf]

Supporting Information

**Hydrogen Bond Directed *ortho*-Selective C–H Borylation of  
Secondary Aromatic Amides**

*Shao-Tao Bai, Charles B. Bheeter, and Joost N. H. Reek\**

anie\_201907366\_sm\_miscellaneous\_information.pdf

SUPPORTING INFORMATION

---

**Table of Contents**

|                                                                                                  |             |
|--------------------------------------------------------------------------------------------------|-------------|
| <b>Table of Contents .....</b>                                                                   | <b>S2</b>   |
| <b>General Information .....</b>                                                                 | <b>S3</b>   |
| <b>Synthesis of supramolecular ligand (BAIPy) .....</b>                                          | <b>S3</b>   |
| <b>Hydrogen bonding interaction studies between ligand BAIPy and substrate 1s .....</b>          | <b>S5</b>   |
| <b>Computational methods, results and coordinates .....</b>                                      | <b>S9</b>   |
| <b>Aromatic compounds 1s-28s .....</b>                                                           | <b>S25</b>  |
| <b>Preparation of the reference borylated compounds .....</b>                                    | <b>S31</b>  |
| <b>Control experiments with substrates that can form 2 or 3 hydrogen bonds .....</b>             | <b>S33</b>  |
| <b>Iridium catalyzed <i>ortho</i>-selective C-H borylation .....</b>                             | <b>S33</b>  |
| <b>Application of the supramolecular catalyst in gram scale <i>ortho</i>-CH borylation .....</b> | <b>S46</b>  |
| <b>Spectra .....</b>                                                                             | <b>S47</b>  |
| <b>References .....</b>                                                                          | <b>S115</b> |

## SUPPORTING INFORMATION

## General Information

All reactions involving air- or moisture sensitive materials were carried out under nitrogen atmosphere using standard Schlenk techniques or in Glove-Box. THF, pentane, hexane and toluene were distilled from sodium-benzophenone under nitrogen atmosphere; dichloromethane, methanol were distilled from CaH<sub>2</sub> under nitrogen atmosphere; triethylamine was distilled from KOH pellets under nitrogen atmosphere. Toluene-d<sub>8</sub> and CD<sub>2</sub>Cl<sub>2</sub> were dried over molecular sieves (3Å) and degassed by three freeze-pump-thaw cycles. <sup>1</sup>H NMR, 1D <sup>1</sup>H NOESY NMR, 2D <sup>1</sup>H NOESY NMR, <sup>1</sup>H-<sup>1</sup>H COSY and <sup>13</sup>C NMR experiments were performed on Bruker AMX 300 MHz, Bruker AMX 400 MHz or Bruker AMX 500 MHz. <sup>1</sup>H NMR chemical shifts are given in ppm, and were calibrated by using the residual solvent as internal reference (CHCl<sub>3</sub> 7.26 ppm, CH<sub>2</sub>Cl<sub>2</sub> 5.32 ppm, THF 3.58 ppm, DMSO 2.50 ppm, Acetone 2.05 ppm). <sup>13</sup>C NMR chemical shifts were reported in ppm with the solvent peaks used as internal reference (CHCl<sub>3</sub> 77.16 ppm, CH<sub>2</sub>Cl<sub>2</sub> 53.84 ppm, THF 67.21 ppm, DMSO 39.52 ppm, Acetone 29.84 ppm). Mass spectra were collected on an AccuTOF GC v 4g, JMS-T100GCV Mass spectrometer (JEOL, Japan), GCMS (EI) or FD/FI probe (FD/FI) equipped with FD Emitter, Carbotec (Germany), FD 13 μm, current rate 51.2 mA/min over 1.2 min, or FI Emitter, Carbotec (Germany), FI 10 μm, flashing current 40 mA on every spectra of 30 ms. All reagents were purchased from commercial suppliers and used without further purification, unless otherwise noted.

## Synthesis of supramolecular ligand (BAIPy)

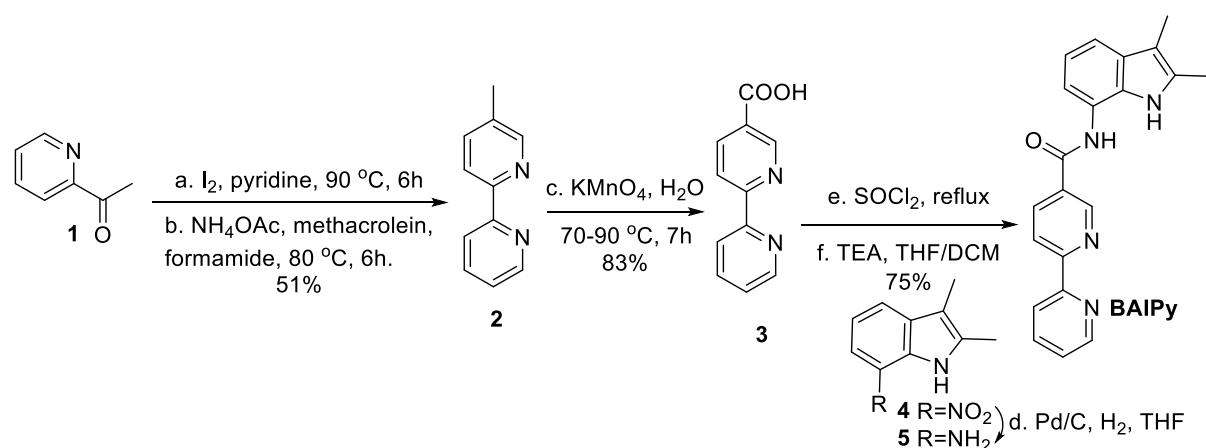

Scheme S1. Synthesis of supramolecular ligand BAIPy

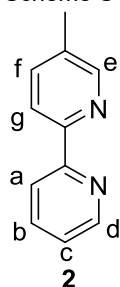

## 5-Methyl-2,2'-bipyridine (2)

2-Acetylpyridine (5.6 mL, 50.0 mmol) and I<sub>2</sub> (14.2 g, 56.0 mmol) were dissolved in pyridine (60 mL) and refluxed for 6 hours. The reaction mixture was then cooled to room temperature and the resulting suspension was filtered, and washed with ethyl ether. The pure 1-(2-pyridylacetyl)pyridinium iodide was obtained after re-crystallization from a saturated EtOH solution and used subsequently. Methacrolein (4.0 mL, 48.3 mmol) and NH<sub>4</sub>OAc (18.6 g, 241.3 mmol) were subsequently added to a solution of 1-(2-pyridylacetyl)pyridinium iodide in formamide. The resulting reaction mixture was heated at 80 °C under nitrogen atmosphere for 6 hours. Then the crude mixture was cooled, water was added and the mixture was carefully extracted with Et<sub>2</sub>O (3x300 mL). The combined organic phases were dried and filtered and the solvent was removed. The residue was purified by column chromatography (eluent of DCM/MeOH 20/1) to give orange product **2**. Identical to literature.<sup>1,2</sup>

Yield of 51%.

<sup>1</sup>H NMR (400 MHz, CDCl<sub>3</sub>) δ 8.67 – 8.66 (m, 1H, Ha), 8.51 (brs, 1H, He), 8.35 (dt, *J* = 7.9, 1.1 Hz, 1H, Hg), 8.28 (d, *J* = 8.1 Hz, 1H, Hd), 7.80 (td, *J* = 7.8, 1.7 Hz, 1H, Hb), 7.64 – 7.61 (m, 1H, Hf), 7.28 (ddd, *J* = 7.2, 4.8, 1.1 Hz, 1H, Hc), 2.40 (s, 3H, Me).

## SUPPORTING INFORMATION

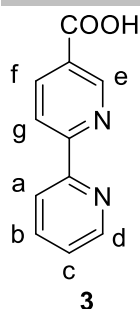**2,2'-Bipyridinyl-5-carboxylic acid (3)**

Potassium permanganate (15.0 g, 94.9 mmol) was added in 7 portions with 1 hour intervals to a solution of 5-methyl-2,2'-bipyridine **2** (3.9 g, 22.9 mmol) in water. The mixture was heated at 70 °C for 3 hours and then at 90 °C for 4 hours. The resulting brown mixture was then filtered while hot through celite and washed with hot water (2x25 mL). The filtrate was concentrated to approximately 10 mL under reduced pressure, and then 1M HCl was added slowly until a pH of 4 was obtained. The residue was then filtered and dried to obtain pure **3** as white powder. Identical to literature.<sup>2</sup>

Yield of 83%.

<sup>1</sup>H NMR (400 MHz, DMSO-*d*<sub>6</sub>) δ 9.16 (s, 1H, He), 8.73 (d, *J* = 4.7 Hz, 1H, Ha), 8.51 (d, *J* = 8.3 Hz, 1H, Hg), 8.46 – 8.40 (m, 2H, Hd,f), 8.00 (t, *J* = 7.7 Hz, 1H, Hb), 7.54 – 7.50 (m, 1H, Hc).

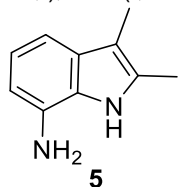**2,3-Dimethyl-1H-indol-7-amine (5)**

2,3-Dimethyl-7-nitro-1H-indol **4** (1.74 g, 0.2 mmol) was dissolved in a suspension of Pd/C (0.4 g) in THF/Methanol. The suspension was stirred vigorously under 1 bar of H<sub>2</sub> atmosphere for 2 hours. After completion (monitored by TLC, ethyl acetate/petroleum ether 1/1), the suspension was filtered over celite and the filtrate was concentrated to dry for subsequent condensation reaction without further purification.

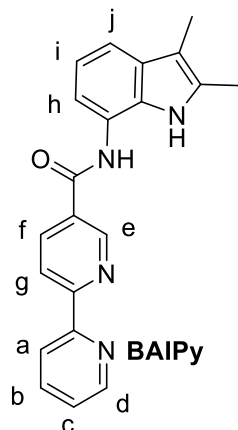**N-(2,3-dimethyl-1H-indol-7-yl)-[2,2'-bipyridine]-5-carboxamide (BAIPy)**

2,2'-Bipyridinyl-5-carboxylic acid **3** (2.0 g, 10.0 mmol) was suspended in SOCl<sub>2</sub> (10 mL). The suspension was heated to reflux for 2 hours until the suspension became homogeneous solution. The volatiles were then removed under vacuum and the resulting acyl chloride was dried for following condensation reaction without further purification.

The acyl chloride was re-dissolved in dry THF and DCM mixtures. Then the acyl chloride solution was added slowly into a solution of the crude amine **5** in THF, followed by adding TEA (4.5 mL, 30.0 mmol) into the reaction mixtures under ice-water bath. The resulting mixture was stirred overnight under room temperature. Then the volatiles were removed and supramolecular ligand **BAIPy** was obtained after column chromatography as dark brownish powder (ethyl acetate/petroleum ether 2/1 to 1/1).

Yield of 75%.

<sup>1</sup>H NMR (500 MHz, DMSO-*d*<sub>6</sub>) δ 10.48 (s, 1H, indole-NH), 10.27 (s, 1H, amide-NH), 9.30 (s, 1H, He), 8.76 (d, *J* = 4.4 Hz, 1H, Hd), 8.57 – 8.49 (m, 3H, Ha,f,g), 8.01 (td, *J* = 7.7, 1.8 Hz, 1H, Hc), 7.53 (dd, *J* = 7.5, 5.0 Hz, 1H, Hb), 7.27 – 7.25 (m, 2H, Hh,j), 6.96 (t, *J* = 7.6 Hz, 1H, Hi), 2.34 (s, 3H, Me), 2.18 (s, 3H, Me).

<sup>13</sup>C NMR (126 MHz, DMSO-*d*<sub>6</sub>) δ 163.65, 157.25, 154.43, 149.54, 148.88, 137.55, 136.90, 131.40, 130.47, 130.40, 129.11, 124.82, 121.51, 121.08, 119.85, 117.89, 115.47, 115.05, 105.54, 11.22, 8.44.

HRMS (PD+(eiFi)) calcd. for C<sub>21</sub>H<sub>18</sub>N<sub>4</sub>O [M]<sup>+</sup> 342.1481, found 342.1455.

## SUPPORTING INFORMATION

## Hydrogen bonding interaction studies between ligand BAIPy and substrate 1s

Table S1. <sup>1</sup>H NMR titration experiments of aromatic amide 1s and BAIPy in toluene-d<sub>8</sub>

| BAIPy/conc(M) | 1s/conc(M) | Indole-NH | Amide-NH |
|---------------|------------|-----------|----------|
| 0.0050        | 0.00000    | 9.8185    | 9.0494   |
| 0.0050        | 0.00250    | 9.8294    | 9.0665   |
| 0.0050        | 0.00500    | 9.8378    | 9.0837   |
| 0.0050        | 0.01000    | 9.8568    | 9.1224   |
| 0.0050        | 0.01500    | 9.8772    | 9.1433   |
| 0.0050        | 0.02000    | 9.8957    | 9.1744   |
| 0.0050        | 0.02500    | 9.9051    | 9.1885   |
| 0.0050        | 0.03000    | 9.9224    | 9.2178   |
| 0.0050        | 0.03500    | 9.9355    | 9.2373   |
| 0.0050        | 0.04000    | 9.9469    | 9.2562   |
| 0.0050        | 0.04500    | 9.9572    | 9.2701   |
| 0.0050        | 0.05000    | 9.9676    | 9.2854   |
| 0.0050        | 0.05500    | 9.9782    | 9.302    |
| 0.0050        | 0.06000    | 9.9865    | 9.3144   |
| 0.0050        | 0.06500    | 9.996     | 9.3265   |
| 0.0050        | 0.07000    | 10.0042   | 9.3383   |
| 0.0050        | 0.07500    | 10.0119   | 9.3483   |
| 0.0050        | 0.08000    | 10.0188   | 9.3575   |
| 0.0050        | 0.08500    | 10.025    | 9.3659   |
| 0.0050        | 0.09000    | 10.0317   | 9.3745   |
| 0.0050        | 0.10000    | 10.0451   | 9.3904   |

Conditions: titration experiments were performed at room temperature.

## SUPPORTING INFORMATION

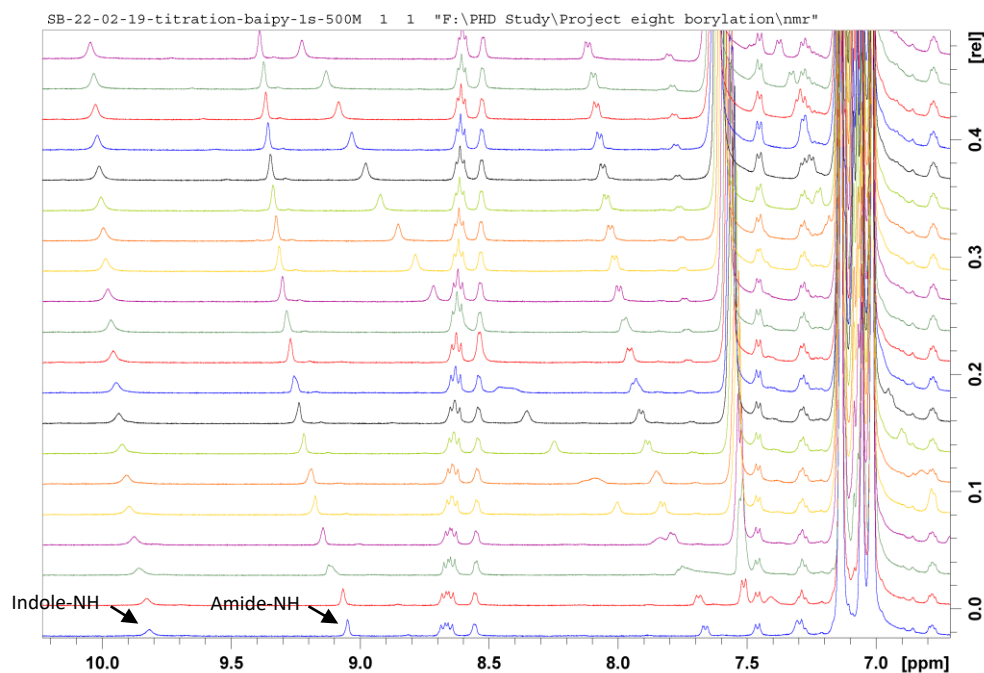

Figure S1.  $^1\text{H}$  NMR experiments of aromatic amide **1s** and **BAIPy** in Toluene- $d_8$  (indole-NH and amide-NH of the ligand indicated by arrows)

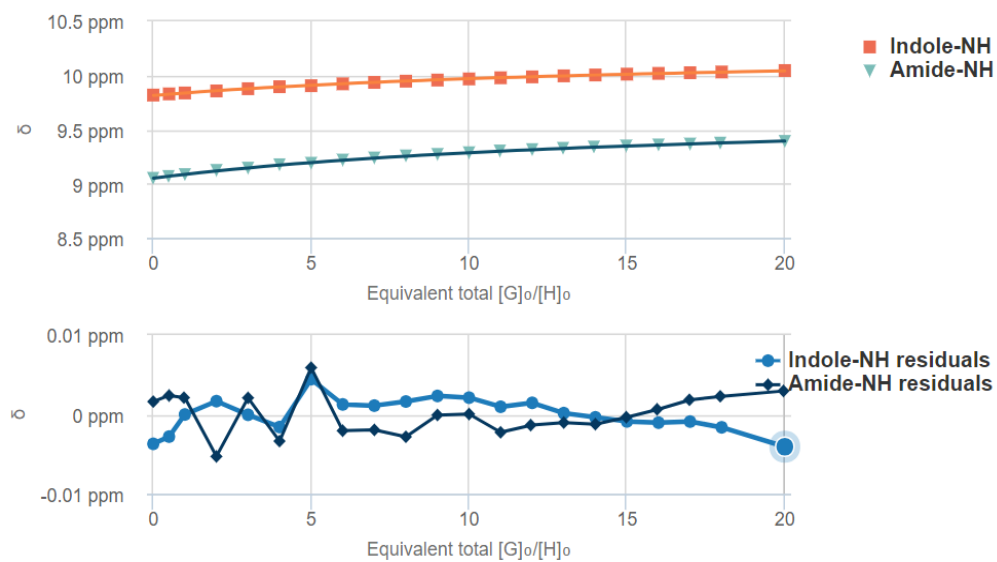

Figure S2. Fitting curve of the titration experiments (<http://app.supramolecular.org/bindif>), using the assumption of 1:1 binding, and using a Nelder-Mead algorithm (the binding energy calculated according to equation of  $\Delta G = RT \ln(K_{\text{bind}})$ ).

## SUPPORTING INFORMATION

## Details

|                   |           |
|-------------------|-----------|
| Time to fit       | 0.2527 s  |
| SSR               | 2.2160e-4 |
| Fitted datapoints | 42        |
| Fitted params     | 5         |

## Parameters

| Parameter (bounds) | Optimised             | Error      | Initial               |
|--------------------|-----------------------|------------|-----------------------|
| K ( 0 → 1000 )     | 12.52 M <sup>-1</sup> | ± 0.7373 % | 26.00 M <sup>-1</sup> |

Figure S3. Fitting results of the titration experiments (<http://app.supramolecular.org/bindif>), using the assumption of 1:1 binding, and using a Nelder-Mead algorithm (the binding energy of 6.3 kJ/mol in toluene calculated according to equation of  $\Delta G = RT \ln(K_{\text{bind}})$ ).

**Table S2.** <sup>1</sup>H NMR titration experiments of aromatic amide **1s** and **BAIPy** in THF-d<sub>8</sub>

| BAIPy/conc(M) | 1s/conc(M) | Indole-NH | Amide-NH |
|---------------|------------|-----------|----------|
| 0.0050        | 0.00000    | 9.6836    | 9.6590   |
| 0.0050        | 0.00250    | 9.6834    | 9.6594   |
| 0.0050        | 0.00500    | 9.6848    | 9.6607   |
| 0.0050        | 0.01000    | 9.6877    | 9.6631   |
| 0.0050        | 0.01500    | 9.6906    | 9.6656   |
| 0.0050        | 0.02000    | 9.6928    | 9.6676   |
| 0.0050        | 0.02500    | 9.6958    | 9.6702   |
| 0.0050        | 0.03000    | 9.6991    | 9.6731   |
| 0.0050        | 0.03500    | 9.7038    | 9.6754   |
| 0.0050        | 0.04000    | 9.7066    | 9.6798   |
| 0.0050        | 0.04500    | 9.7086    | 9.6823   |
| 0.0050        | 0.05000    | 9.7110    | 9.6840   |
| 0.0050        | 0.05500    | 9.7184    | 9.6904   |
| 0.0050        | 0.06000    | 9.7227    | 9.6945   |
| 0.0050        | 0.06500    | 9.7235    | 9.6950   |
| 0.0050        | 0.07000    | 9.7254    | 9.6968   |
| 0.0050        | 0.07500    | 9.7277    | 9.6989   |
| 0.0050        | 0.08000    | 9.7306    | 9.7015   |
| 0.0050        | 0.08500    | 9.7316    | 9.7027   |
| 0.0050        | 0.09000    | 9.7354    | 9.7058   |
| 0.0050        | 0.10000    | 9.7398    | 9.7115   |

## SUPPORTING INFORMATION

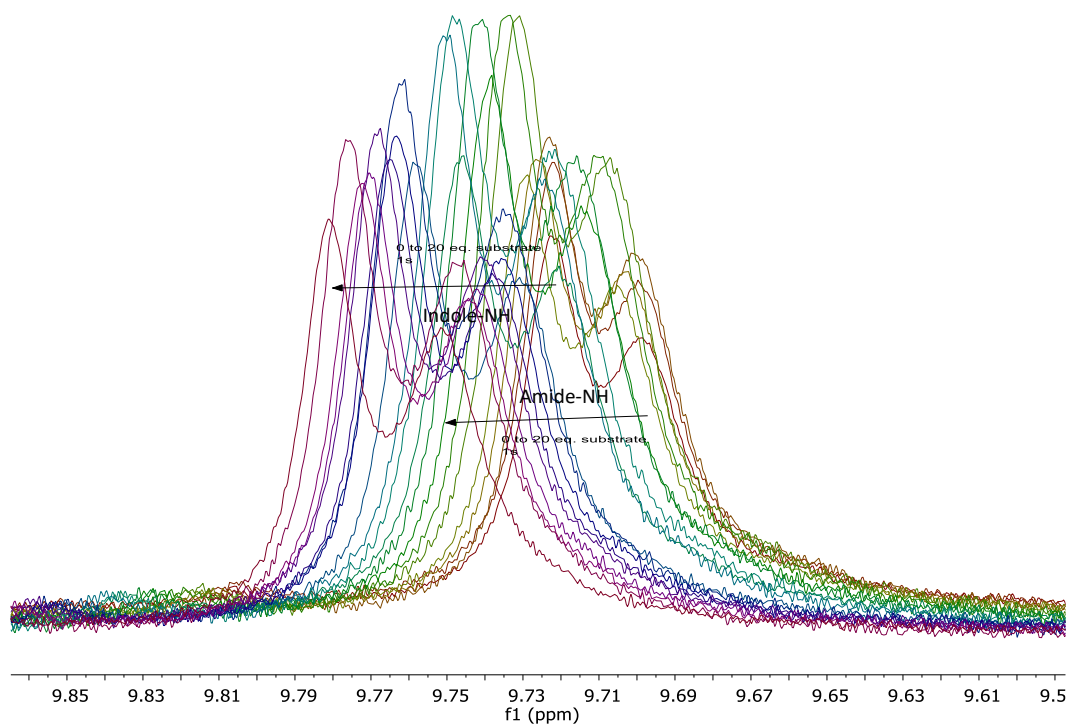

Figure S4.  $^1\text{H}$  NMR experiments of aromatic amide **1s** and **BAIPy** in  $\text{THF-d}_8$  (indole-NH and amide-NH of the ligand indicated)

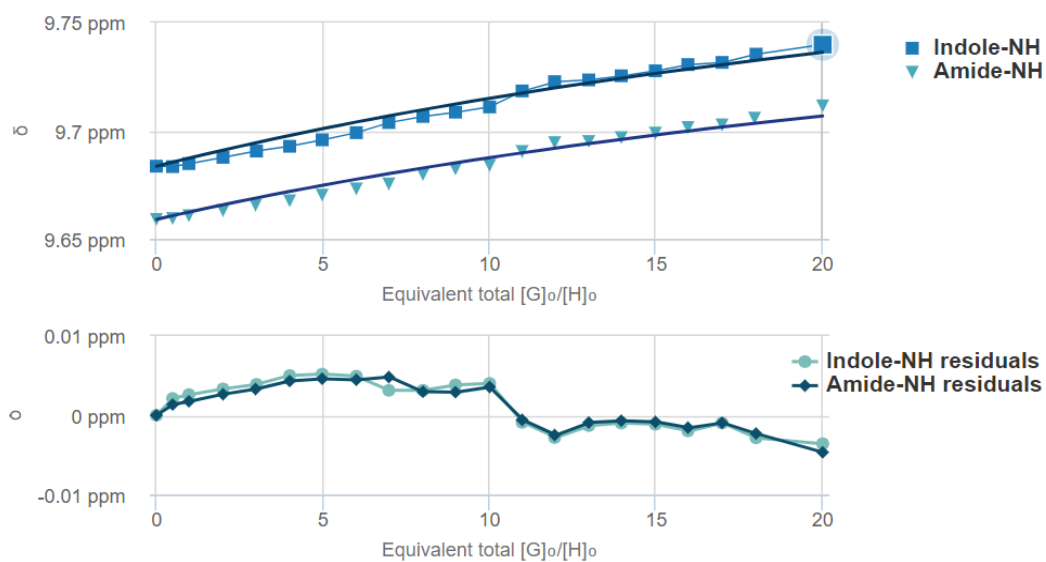

Figure S5. Fitting curve of the titration experiments in  $\text{THF-d}_8$  (<http://app.supramolecular.org/bindif>), using the assumption of 1:1 binding, and using a L-BFGS-B algorithm (the binding energy calculated according to equation of  $\Delta G = RT \ln(K_{\text{bind}})$ ).



## SUPPORTING INFORMATION

| Details            |                      |            |                      |
|--------------------|----------------------|------------|----------------------|
| Time to fit        | 3.7100e-3 s          |            |                      |
| SSR                | 3.7834e-4            |            |                      |
| Fitted datapoints  | 42                   |            |                      |
| Fitted params      | 3                    |            |                      |
| Parameters         |                      |            |                      |
| Parameter (bounds) | Optimised            | Error      | Initial              |
| K ( 5 → 35 )       | 5.00 M <sup>-1</sup> | ± 4.4155 % | 5.00 M <sup>-1</sup> |

Figure S6. Fitting results of the titration experiments in THF-d<sub>8</sub> (<http://app.supramolecular.org/bindif>), using the assumption of 1:1 binding, and using a L-BFGS-B algorithm (the binding energy of 4.0 kJ/mol in THF calculated according to equation of  $\Delta G = RT \ln(K_{\text{bind}})$ ).

### Computational methods, results and coordinates

Turbomole program<sup>3</sup> coupled to the PQS Baker optimizer<sup>4</sup> via the BOpt package<sup>5</sup> was used for all DFT geometry optimizations. Geometries were fully optimized as minima using the BP86 functional<sup>6,7</sup> and the resolution-of-identity (ri) method<sup>8</sup> using the Turbomole def2-TZVP basis<sup>9</sup> for all atoms. Grimme's dispersion corrections (D3 version, implemented with the keyword disp3 in Turbomole)<sup>9</sup> were applied in all calculations. All minima (no imaginary frequencies) were characterized by calculating the Hessian matrix. ZPE and gas-phase thermal corrections (entropy and enthalpy, 298 K, 1 bar) from these analyses were calculated. The relative enthalpy (free) energies obtained from these calculations are reported in the main text of this paper.

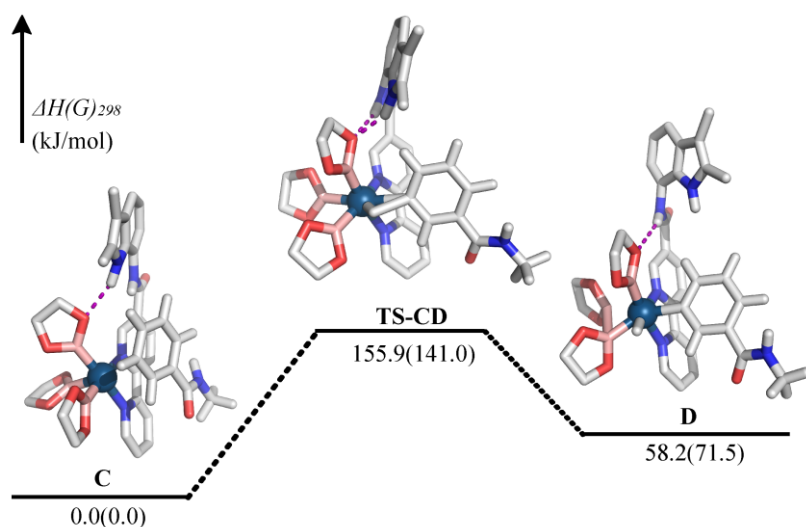

Figure S7. DFT calculated pathway for the C-H bond activation step in **BAIPy**-Ir catalyzed *meta*-selective C-H borylation of **1s** without substrate pre-binding to the catalyst via hydrogen bonds (BP86-D3/def2-TZVP and hydrogen bonds shown in purple dots; Enthalpy and Gibbs Free energies were reported)

## SUPPORTING INFORMATION

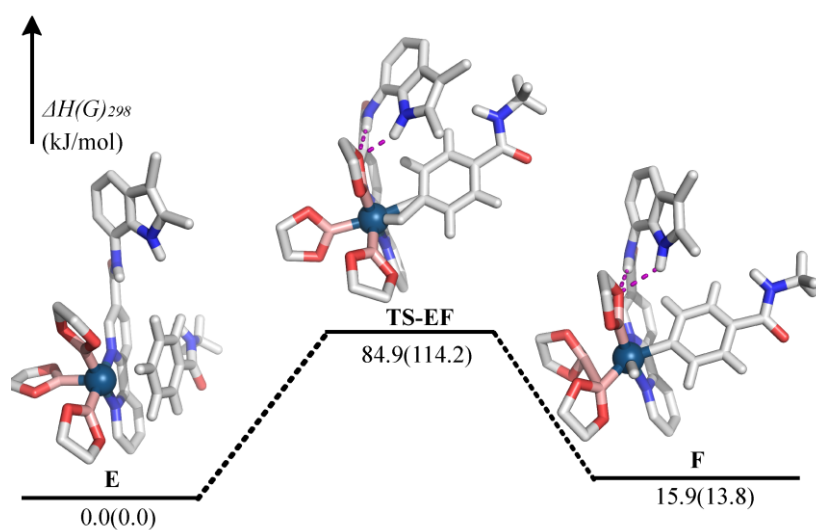

Figure S8. DFT calculated pathway for the C-H bond activation step in **BAIPy**-Ir catalyzed *para*-selective C-H borylation of **1s** without substrate pre-binding to the catalyst via hydrogen bonds (BP86-D3/def2-TZVP and hydrogen bonds shown in purple dots; Enthalpy and Gibbs Free energies were reported)

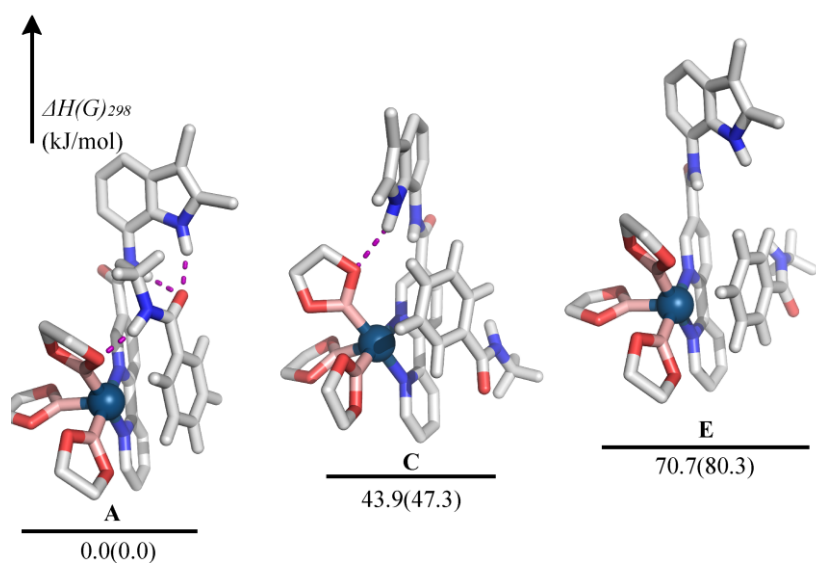

Figure S9. DFT calculated energies of the starting complexes for **BAIPy**-Ir catalyzed *ortho*-, *meta*-, and *para*-selective C-H borylation of **1s** (BP86-D3/def2-TZVP; hydrogen bonds shown in purple dots; Enthalpy and Gibbs Free energies were reported)

## SUPPORTING INFORMATION

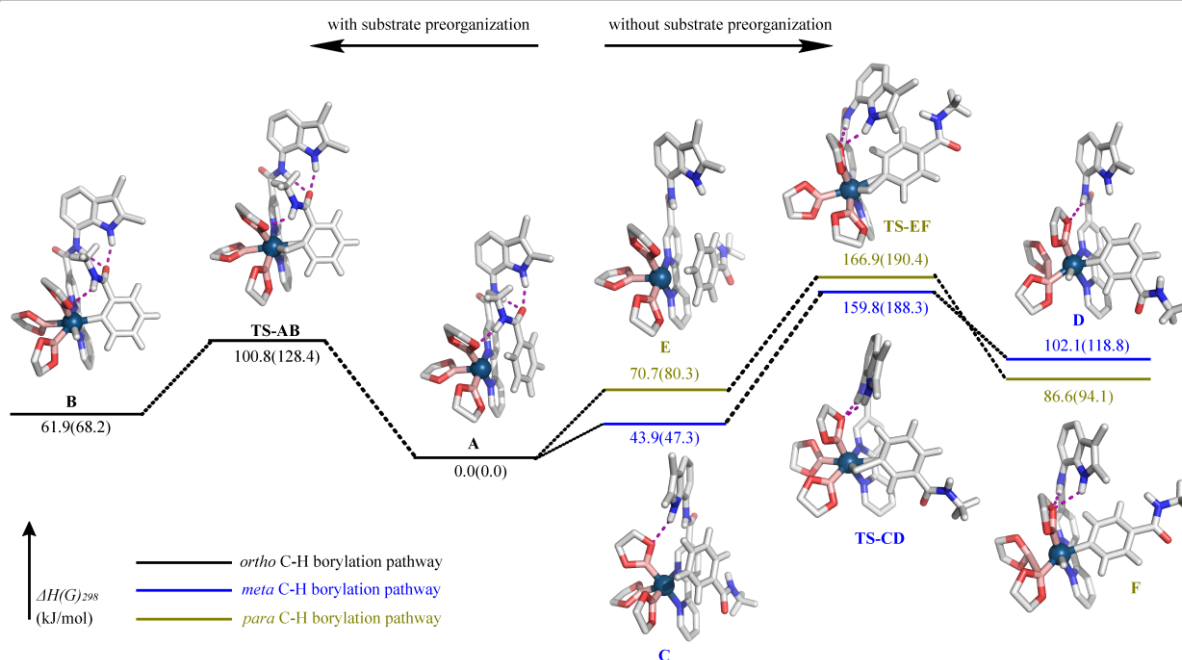

Figure S10. DFT calculated energies of the C-H activation step for **BAIPy-Ir** catalyzed *ortho*-, *meta*-, and *para*-selective C-H borylation of **1s** (BP86-D3/def2-TZVP and hydrogen bonds shown in purple dots; Enthalpy and Gibbs Free energies were reported)

Table S3. Gas phase thermochemical data (BP86-D3/def2-TZVP)<sup>a</sup>

| species      | SCF        | ZPE    | Enthalpy correction | Free energy correction | SCF+ZPE    | Enthalpy   | Free Energy |
|--------------|------------|--------|---------------------|------------------------|------------|------------|-------------|
| <b>A</b>     | -2413.3984 | 0.7002 | 0.7515              | 0.6121                 | -2412.0861 | -2412.0348 | -2412.7863  |
| <b>B</b>     | -2413.3713 | 0.6979 | 0.7490              | 0.6110                 | -2412.0624 | -2412.0113 | -2412.7603  |
| <b>TS-AB</b> | -2413.3498 | 0.6919 | 0.7408              | 0.6125                 | -2412.0454 | -2411.9965 | -2412.7373  |
| <b>C</b>     | -2413.3782 | 0.6989 | 0.7503              | 0.6098                 | -2412.0695 | -2412.0180 | -2412.7684  |
| <b>D</b>     | -2413.3480 | 0.6949 | 0.7452              | 0.6070                 | -2412.0461 | -2411.9959 | -2412.7411  |
| <b>TS-CD</b> | -2413.3255 | 0.6915 | 0.7408              | 0.6108                 | -2412.0232 | -2411.9739 | -2412.7147  |
| <b>E</b>     | -2413.3659 | 0.6977 | 0.7478              | 0.6101                 | -2412.0581 | -2412.0079 | -2412.7557  |
| <b>F</b>     | -2413.3568 | 0.6965 | 0.7485              | 0.6063                 | -2412.0539 | -2412.0019 | -2412.7504  |
| <b>TS-EF</b> | -2413.3243 | 0.6919 | 0.7410              | 0.6120                 | -2412.0203 | -2411.9713 | -2412.7123  |

<sup>a</sup> SCF = self-consistent field energy of the stationary point geometry (atomic units)

ZPE = Zero-point energy (atomic units)

$H_{corr}$  and  $G_{corr}$  = correction to enthalpy and Gibb's free energy respectively at 298 K (atomic units)

$H$  and  $G$  = enthalpy and Gibb's free energy (atomic units)

## SUPPORTING INFORMATION

## XYZ Coordinates

| <b>A</b> |           |           |           |
|----------|-----------|-----------|-----------|
| C        | 2.314000  | 2.348000  | -1.758000 |
| C        | 3.082000  | 1.262000  | -1.321000 |
| C        | 2.655000  | -0.048000 | -1.547000 |
| C        | 1.427000  | -0.274000 | -2.217000 |
| C        | 0.651000  | 0.819000  | -2.638000 |
| C        | 1.108000  | 2.130000  | -2.415000 |
| Ir       | -0.482000 | -0.184000 | -0.264000 |
| N        | -0.856000 | 1.990000  | -0.093000 |
| C        | -0.034000 | 2.679000  | 0.745000  |
| C        | -0.195000 | 4.060000  | 0.935000  |
| C        | -1.209000 | 4.737000  | 0.267000  |
| C        | -2.050000 | 4.016000  | -0.583000 |
| C        | -1.841000 | 2.650000  | -0.735000 |
| C        | 1.013000  | 1.892000  | 1.420000  |
| N        | 1.065000  | 0.574000  | 1.100000  |
| C        | 2.006000  | -0.200000 | 1.673000  |
| C        | 2.936000  | 0.285000  | 2.593000  |
| C        | 2.852000  | 1.633000  | 2.964000  |
| C        | 1.899000  | 2.439000  | 2.362000  |
| B        | -1.711000 | -0.547000 | 1.300000  |
| O        | -1.332000 | -0.174000 | 2.598000  |
| C        | -2.452000 | -0.415000 | 3.474000  |
| C        | -3.398000 | -1.307000 | 2.649000  |
| O        | -2.995000 | -1.092000 | 1.282000  |
| B        | -2.022000 | -0.754000 | -1.493000 |
| O        | -2.605000 | -2.024000 | -1.626000 |
| C        | -3.793000 | -1.915000 | -2.425000 |
| C        | -3.624000 | -0.585000 | -3.176000 |
| O        | -2.663000 | 0.147000  | -2.386000 |
| B        | -0.198000 | -2.197000 | -0.189000 |
| O        | -0.387000 | -3.014000 | 0.937000  |
| C        | -0.039000 | -4.374000 | 0.615000  |
| C        | -0.003000 | -4.396000 | -0.917000 |
| O        | 0.256000  | -3.020000 | -1.275000 |
| H        | 1.117000  | -1.275000 | -2.509000 |
| H        | -2.452000 | 2.035000  | -1.397000 |
| H        | 0.472000  | 4.603000  | 1.601000  |
| H        | -2.859000 | 4.501000  | -1.128000 |
| H        | -1.339000 | 5.810000  | 0.408000  |
| H        | 1.834000  | 3.491000  | 2.634000  |
| H        | 3.531000  | 2.021000  | 3.723000  |
| H        | 1.975000  | -1.254000 | 1.400000  |
| H        | -4.557000 | -0.006000 | -3.248000 |
| H        | -3.216000 | -0.729000 | -4.191000 |
| H        | -4.672000 | -1.903000 | -1.758000 |
| H        | -3.868000 | -2.782000 | -3.097000 |
| H        | 4.017000  | 1.413000  | -0.782000 |
| H        | 2.663000  | 3.365000  | -1.575000 |
| H        | -0.272000 | 0.650000  | -3.190000 |
| H        | 0.500000  | 2.974000  | -2.743000 |
| H        | -2.097000 | -0.899000 | 4.395000  |
| H        | -2.916000 | 0.552000  | 3.736000  |
| H        | -3.269000 | -2.375000 | 2.889000  |
| H        | -4.458000 | -1.039000 | 2.765000  |
| H        | 0.945000  | -4.609000 | 1.058000  |
| H        | -0.790000 | -5.056000 | 1.037000  |
| H        | 0.784000  | -5.042000 | -1.333000 |
| H        | -0.975000 | -4.686000 | -1.347000 |
| C        | 7.467000  | -4.476000 | 3.445000  |
| C        | 6.534000  | -4.041000 | 4.383000  |
| C        | 5.589000  | -3.042000 | 4.085000  |
| C        | 5.557000  | -2.438000 | 2.821000  |
| C        | 6.505000  | -2.871000 | 1.873000  |
| C        | 7.454000  | -3.891000 | 2.167000  |
| N        | 4.608000  | -1.457000 | 2.449000  |

## SUPPORTING INFORMATION

---

|   |           |           |           |
|---|-----------|-----------|-----------|
| N | 6.730000  | -2.458000 | 0.578000  |
| C | 7.766000  | -3.204000 | 0.030000  |
| C | 8.246000  | -4.088000 | 0.980000  |
| C | 3.931000  | -0.606000 | 3.287000  |
| O | 4.071000  | -0.531000 | 4.508000  |
| C | 9.373000  | -5.062000 | 0.850000  |
| H | 8.193000  | -5.251000 | 3.694000  |
| H | 6.526000  | -4.480000 | 5.382000  |
| H | 4.881000  | -2.718000 | 4.842000  |
| H | 6.107000  | -1.837000 | 0.051000  |
| H | 10.184000 | -4.836000 | 1.561000  |
| H | 9.041000  | -6.091000 | 1.061000  |
| H | 9.807000  | -5.055000 | -0.159000 |
| H | 4.534000  | -1.251000 | 1.445000  |
| C | 8.192000  | -2.956000 | -1.378000 |
| H | 8.981000  | -3.657000 | -1.675000 |
| H | 8.582000  | -1.934000 | -1.508000 |
| H | 7.353000  | -3.075000 | -2.083000 |
| C | 3.493000  | -1.150000 | -0.983000 |
| O | 4.603000  | -0.894000 | -0.450000 |
| N | 2.999000  | -2.401000 | -1.025000 |
| C | 3.702000  | -3.526000 | -0.427000 |
| H | 3.138000  | -4.439000 | -0.646000 |
| H | 4.714000  | -3.622000 | -0.838000 |
| H | 3.794000  | -3.421000 | 0.665000  |
| H | 2.014000  | -2.561000 | -1.289000 |

|          |           |           |           |
|----------|-----------|-----------|-----------|
| <b>B</b> |           |           |           |
| C        | 3.363000  | 1.931000  | -3.248000 |
| C        | 3.752000  | 0.986000  | -2.306000 |
| C        | 2.798000  | 0.202000  | -1.628000 |
| C        | 1.404000  | 0.398000  | -1.806000 |
| C        | 1.060000  | 1.346000  | -2.796000 |
| C        | 2.000000  | 2.088000  | -3.513000 |
| Ir       | -0.259000 | -0.252000 | -0.534000 |
| N        | -0.655000 | 1.932000  | -0.301000 |
| C        | 0.075000  | 2.532000  | 0.672000  |
| C        | -0.016000 | 3.913000  | 0.894000  |
| C        | -0.879000 | 4.679000  | 0.117000  |
| C        | -1.641000 | 4.046000  | -0.866000 |
| C        | -1.497000 | 2.673000  | -1.041000 |
| C        | 0.944000  | 1.646000  | 1.460000  |
| N        | 0.975000  | 0.332000  | 1.094000  |
| C        | 1.774000  | -0.518000 | 1.766000  |
| C        | 2.574000  | -0.119000 | 2.836000  |
| C        | 2.495000  | 1.209000  | 3.263000  |
| C        | 1.690000  | 2.092000  | 2.559000  |
| B        | -1.659000 | -0.634000 | 1.071000  |
| O        | -1.773000 | 0.356000  | 2.053000  |
| C        | -2.725000 | -0.087000 | 3.045000  |
| C        | -2.902000 | -1.588000 | 2.756000  |
| O        | -2.405000 | -1.759000 | 1.411000  |
| B        | -2.198000 | -0.777000 | -1.138000 |
| O        | -2.657000 | -2.058000 | -1.466000 |
| C        | -4.092000 | -1.996000 | -1.504000 |
| C        | -4.390000 | -0.517000 | -1.791000 |
| O        | -3.229000 | 0.175000  | -1.280000 |
| B        | 0.093000  | -2.266000 | -0.555000 |
| O        | 0.245000  | -3.059000 | 0.591000  |
| C        | 0.256000  | -4.449000 | 0.215000  |
| C        | 0.141000  | -4.448000 | -1.329000 |
| O        | 0.188000  | -3.060000 | -1.712000 |
| H        | -0.897000 | -0.557000 | -1.996000 |
| H        | -2.081000 | 2.123000  | -1.776000 |
| H        | 0.588000  | 4.390000  | 1.663000  |
| H        | -2.338000 | 4.601000  | -1.492000 |
| H        | -0.955000 | 5.754000  | 0.278000  |

## SUPPORTING INFORMATION

|   |           |           |           |
|---|-----------|-----------|-----------|
| H | 1.636000  | 3.134000  | 2.865000  |
| H | 3.073000  | 1.531000  | 4.129000  |
| H | 1.732000  | -1.557000 | 1.445000  |
| H | -5.288000 | -0.145000 | -1.278000 |
| H | -4.481000 | -0.315000 | -2.872000 |
| H | -4.485000 | -2.308000 | -0.522000 |
| H | -4.469000 | -2.675000 | -2.282000 |
| H | 4.809000  | 0.821000  | -2.089000 |
| H | 4.109000  | 2.524000  | -3.779000 |
| H | 0.005000  | 1.530000  | -3.010000 |
| H | 1.664000  | 2.801000  | -4.269000 |
| H | -2.326000 | 0.116000  | 4.048000  |
| H | -3.662000 | 0.479000  | 2.911000  |
| H | -2.301000 | -2.217000 | 3.432000  |
| H | -3.950000 | -1.917000 | 2.801000  |
| H | 1.186000  | -4.915000 | 0.576000  |
| H | -0.596000 | -4.949000 | 0.697000  |
| H | 0.963000  | -4.989000 | -1.822000 |
| H | -0.814000 | -4.873000 | -1.674000 |
| C | 7.385000  | -4.608000 | 3.428000  |
| C | 6.373000  | -4.396000 | 4.362000  |
| C | 5.346000  | -3.457000 | 4.147000  |
| C | 5.311000  | -2.694000 | 2.974000  |
| C | 6.340000  | -2.899000 | 2.034000  |
| C | 7.375000  | -3.854000 | 2.242000  |
| N | 4.302000  | -1.758000 | 2.668000  |
| N | 6.579000  | -2.287000 | 0.823000  |
| C | 7.718000  | -2.834000 | 0.245000  |
| C | 8.239000  | -3.798000 | 1.091000  |
| C | 3.488000  | -1.084000 | 3.541000  |
| O | 3.474000  | -1.190000 | 4.767000  |
| C | 9.464000  | -4.633000 | 0.894000  |
| H | 8.172000  | -5.341000 | 3.614000  |
| H | 6.366000  | -4.969000 | 5.290000  |
| H | 4.574000  | -3.305000 | 4.897000  |
| H | 5.954000  | -1.605000 | 0.380000  |
| H | 10.201000 | -4.461000 | 1.695000  |
| H | 9.224000  | -5.709000 | 0.908000  |
| H | 9.959000  | -4.418000 | -0.062000 |
| H | 4.280000  | -1.413000 | 1.695000  |
| C | 8.184000  | -2.344000 | -1.084000 |
| H | 9.080000  | -2.886000 | -1.406000 |
| H | 8.431000  | -1.271000 | -1.054000 |
| H | 7.412000  | -2.479000 | -1.859000 |
| C | 3.402000  | -0.883000 | -0.795000 |
| O | 4.347000  | -0.666000 | 0.007000  |
| N | 2.942000  | -2.126000 | -1.032000 |
| C | 3.432000  | -3.305000 | -0.338000 |
| H | 3.079000  | -4.194000 | -0.872000 |
| H | 4.528000  | -3.315000 | -0.317000 |
| H | 3.068000  | -3.349000 | 0.700000  |
| H | 2.145000  | -2.229000 | -1.662000 |

**TS-AB**

|    |           |           |           |
|----|-----------|-----------|-----------|
| C  | 3.180000  | 1.993000  | -3.113000 |
| C  | 3.608000  | 1.002000  | -2.236000 |
| C  | 2.689000  | 0.140000  | -1.608000 |
| C  | 1.297000  | 0.322000  | -1.785000 |
| C  | 0.898000  | 1.302000  | -2.714000 |
| C  | 1.812000  | 2.125000  | -3.372000 |
| Ir | -0.295000 | -0.326000 | -0.324000 |
| N  | -0.668000 | 1.903000  | -0.079000 |
| C  | 0.041000  | 2.508000  | 0.908000  |
| C  | -0.094000 | 3.882000  | 1.156000  |
| C  | -0.971000 | 4.640000  | 0.388000  |
| C  | -1.704000 | 4.005000  | -0.614000 |
| C  | -1.522000 | 2.639000  | -0.814000 |

## SUPPORTING INFORMATION

---

|   |           |           |           |
|---|-----------|-----------|-----------|
| C | 0.957000  | 1.648000  | 1.677000  |
| N | 1.014000  | 0.342000  | 1.307000  |
| C | 1.879000  | -0.477000 | 1.931000  |
| C | 2.739000  | -0.049000 | 2.943000  |
| C | 2.627000  | 1.273000  | 3.384000  |
| C | 1.741000  | 2.123000  | 2.739000  |
| B | -1.774000 | -0.638000 | 1.160000  |
| O | -1.672000 | -0.004000 | 2.403000  |
| C | -2.867000 | -0.288000 | 3.163000  |
| C | -3.547000 | -1.435000 | 2.392000  |
| O | -2.939000 | -1.404000 | 1.084000  |
| B | -1.942000 | -0.781000 | -1.498000 |
| O | -2.422000 | -2.049000 | -1.822000 |
| C | -3.739000 | -1.902000 | -2.377000 |
| C | -3.789000 | -0.440000 | -2.849000 |
| O | -2.763000 | 0.211000  | -2.067000 |
| B | -0.086000 | -2.340000 | -0.072000 |
| O | -0.093000 | -2.986000 | 1.175000  |
| C | 0.087000  | -4.403000 | 0.977000  |
| C | -0.053000 | -4.602000 | -0.544000 |
| O | 0.130000  | -3.285000 | -1.098000 |
| H | 0.040000  | -0.805000 | -1.831000 |
| H | -2.082000 | 2.085000  | -1.567000 |
| H | 0.489000  | 4.360000  | 1.941000  |
| H | -2.410000 | 4.552000  | -1.240000 |
| H | -1.081000 | 5.710000  | 0.573000  |
| H | 1.663000  | 3.161000  | 3.058000  |
| H | 3.244000  | 1.615000  | 4.215000  |
| H | 1.846000  | -1.519000 | 1.621000  |
| H | -4.756000 | 0.046000  | -2.659000 |
| H | -3.539000 | -0.338000 | -3.919000 |
| H | -4.479000 | -2.101000 | -1.583000 |
| H | -3.880000 | -2.625000 | -3.193000 |
| H | 4.670000  | 0.868000  | -2.021000 |
| H | 3.905000  | 2.646000  | -3.600000 |
| H | -0.168000 | 1.435000  | -2.911000 |
| H | 1.456000  | 2.878000  | -4.078000 |
| H | -2.587000 | -0.566000 | 4.189000  |
| H | -3.492000 | 0.620000  | 3.198000  |
| H | -3.346000 | -2.418000 | 2.850000  |
| H | -4.634000 | -1.304000 | 2.293000  |
| H | 1.081000  | -4.696000 | 1.353000  |
| H | -0.678000 | -4.948000 | 1.550000  |
| H | 0.697000  | -5.289000 | -0.963000 |
| H | -1.057000 | -4.959000 | -0.825000 |
| C | 7.663000  | -4.457000 | 3.298000  |
| C | 6.758000  | -4.175000 | 4.318000  |
| C | 5.705000  | -3.255000 | 4.148000  |
| C | 5.534000  | -2.580000 | 2.931000  |
| C | 6.457000  | -2.856000 | 1.902000  |
| C | 7.515000  | -3.794000 | 2.067000  |
| N | 4.488000  | -1.668000 | 2.675000  |
| N | 6.556000  | -2.342000 | 0.627000  |
| C | 7.630000  | -2.932000 | -0.028000 |
| C | 8.248000  | -3.829000 | 0.827000  |
| C | 3.742000  | -0.967000 | 3.589000  |
| O | 3.849000  | -1.019000 | 4.814000  |
| C | 9.448000  | -4.681000 | 0.560000  |
| H | 8.472000  | -5.174000 | 3.449000  |
| H | 6.857000  | -4.675000 | 5.283000  |
| H | 5.020000  | -3.047000 | 4.965000  |
| H | 5.896000  | -1.676000 | 0.212000  |
| H | 10.272000 | -4.443000 | 1.253000  |
| H | 9.219000  | -5.751000 | 0.692000  |
| H | 9.828000  | -4.547000 | -0.462000 |
| H | 4.378000  | -1.366000 | 1.695000  |
| C | 7.941000  | -2.549000 | -1.436000 |

## SUPPORTING INFORMATION

|   |          |           |           |
|---|----------|-----------|-----------|
| H | 8.806000 | -3.110000 | -1.809000 |
| H | 8.174000 | -1.475000 | -1.520000 |
| H | 7.092000 | -2.752000 | -2.108000 |
| C | 3.314000 | -0.942000 | -0.783000 |
| O | 4.321000 | -0.711000 | -0.066000 |
| N | 2.803000 | -2.179000 | -0.911000 |
| C | 3.297000 | -3.327000 | -0.169000 |
| H | 2.859000 | -4.231000 | -0.603000 |
| H | 4.391000 | -3.390000 | -0.230000 |
| H | 3.021000 | -3.278000 | 0.897000  |
| H | 1.932000 | -2.306000 | -1.428000 |

**C**

|    |            |            |            |
|----|------------|------------|------------|
| C  | 3.3358592  | 1.6264111  | -1.0409786 |
| C  | 3.7777583  | 0.2938755  | -1.0661452 |
| C  | 2.9877177  | -0.6893559 | -1.6492179 |
| C  | 1.7411909  | -0.3609826 | -2.2145682 |
| C  | 1.3144982  | 0.9765523  | -2.2158096 |
| C  | 2.1145368  | 1.9798379  | -1.6197632 |
| Ir | -0.2673339 | -0.2027680 | -0.3213489 |
| N  | -1.0400714 | 1.8900352  | -0.3931152 |
| C  | -0.5571579 | 2.7463679  | 0.5520365  |
| C  | -1.0930577 | 4.0302984  | 0.7090064  |
| C  | -2.1180490 | 4.4554828  | -0.1295313 |
| C  | -2.5908106 | 3.5791460  | -1.1061067 |
| C  | -2.0337024 | 2.3071512  | -1.2003102 |
| C  | 0.5632550  | 2.2365830  | 1.3561923  |
| N  | 0.8525844  | 0.9216666  | 1.1716500  |
| C  | 1.9217831  | 0.3997371  | 1.7848761  |
| C  | 2.8071250  | 1.1477499  | 2.5616498  |
| C  | 2.4803773  | 2.4865238  | 2.8152904  |
| C  | 1.3478493  | 3.0254799  | 2.2144332  |
| B  | -1.7742928 | -0.7014466 | 0.9287401  |
| O  | -1.6722260 | -0.4579592 | 2.3095464  |
| C  | -2.9417500 | -0.7940419 | 2.9071795  |
| C  | -3.6583487 | -1.6279882 | 1.8308346  |
| O  | -3.0120382 | -1.2521239 | 0.6001719  |
| B  | -1.3454133 | -1.0837977 | -1.8289671 |
| O  | -1.0035977 | -2.2658025 | -2.5143551 |
| C  | -2.0451158 | -2.5792842 | -3.4584111 |
| C  | -2.8579527 | -1.2776098 | -3.5847647 |
| O  | -2.4840240 | -0.5064146 | -2.4273728 |
| B  | 0.3298754  | -2.0882177 | 0.1953331  |
| O  | -0.5225178 | -3.1193121 | 0.6257571  |
| C  | 0.2395656  | -4.1354470 | 1.2912200  |
| C  | 1.6700696  | -3.9119936 | 0.7969332  |
| O  | 1.6905145  | -2.5226705 | 0.3817107  |
| H  | 1.1676132  | -1.1227897 | -2.7402718 |
| H  | -2.3810510 | 1.5695440  | -1.9248786 |
| H  | -0.7096295 | 4.6921191  | 1.4837260  |
| H  | -3.3854021 | 3.8689149  | -1.7924577 |
| H  | -2.5400493 | 5.4546831  | -0.0211320 |
| H  | 1.0933955  | 4.0719547  | 2.3776947  |
| H  | 3.1290660  | 3.0796258  | 3.4605784  |
| H  | 2.0500747  | -0.6708080 | 1.6247346  |
| H  | -3.9444565 | -1.4472024 | -3.5750859 |
| H  | -2.5968470 | -0.7102043 | -4.4942198 |
| H  | -2.6516956 | -3.4069743 | -3.0555249 |
| H  | -1.5965655 | -2.8994045 | -4.4100878 |
| H  | 4.7580899  | 0.0378669  | -0.6597057 |
| H  | 3.9890625  | 2.3867200  | -0.6095142 |
| H  | 0.4240263  | 1.2865988  | -2.7616080 |
| H  | 2.6792146  | 3.9058437  | -0.0096851 |
| H  | -2.7720988 | -1.3481857 | 3.8415367  |
| H  | -3.4855731 | 0.1375996  | 3.1402325  |
| H  | -3.5140267 | -2.7102506 | 1.9878074  |
| H  | -4.7347785 | -1.4151341 | 1.7613314  |



## SUPPORTING INFORMATION

---

|   |            |            |            |
|---|------------|------------|------------|
| H | 0.1556915  | -3.9964331 | 2.3830795  |
| H | -0.1546088 | -5.1274892 | 1.0281939  |
| H | 2.4378518  | -4.0775796 | 1.5659221  |
| H | 1.8979405  | -4.5455657 | -0.0762898 |
| C | 7.8092514  | -3.1644526 | 2.3831958  |
| C | 7.6972346  | -2.1609959 | 3.3430596  |
| C | 6.6084128  | -1.2685103 | 3.3701815  |
| C | 5.5885795  | -1.3777879 | 2.4181793  |
| C | 5.6829051  | -2.4103092 | 1.4656892  |
| C | 6.7874426  | -3.2995056 | 1.4257993  |
| N | 4.4821093  | -0.5220898 | 2.3131140  |
| N | 4.8418230  | -2.7346729 | 0.4153753  |
| C | 5.3772502  | -3.8247896 | -0.2729372 |
| C | 6.5748150  | -4.1895336 | 0.3119149  |
| C | 4.0795477  | 0.5445857  | 3.0849133  |
| O | 4.6758225  | 0.9865913  | 4.0653955  |
| C | 7.5135460  | -5.2719793 | -0.1161494 |
| H | 8.6716411  | -3.8322595 | 2.3722841  |
| H | 8.4783954  | -2.0461985 | 4.0955405  |
| H | 6.5492628  | -0.4794137 | 4.1152939  |
| H | 3.8633171  | -2.4556155 | 0.3219404  |
| H | 8.4915794  | -4.8618685 | -0.4150726 |
| H | 7.7019173  | -5.9824734 | 0.7042378  |
| H | 7.1203705  | -5.8427150 | -0.9676886 |
| H | 3.9362222  | -0.6486162 | 1.4651489  |
| C | 4.6878336  | -4.3503064 | -1.4867697 |
| H | 5.0417874  | -5.3586651 | -1.7315289 |
| H | 4.8728531  | -3.7095649 | -2.3646063 |
| H | 3.5984544  | -4.4005001 | -1.3455160 |
| C | 1.6036087  | 3.3907604  | -1.6859564 |
| O | 0.7461268  | 3.7411293  | -2.5017818 |
| N | 2.1368885  | 4.2721706  | -0.7835109 |
| C | 1.6654465  | 5.6437921  | -0.7167053 |
| H | 1.9517812  | 6.0749411  | 0.2500030  |
| H | 2.0989387  | 6.2558553  | -1.5215695 |
| H | 0.5720212  | 5.6707426  | -0.8261846 |
| H | 3.3328868  | -1.7200079 | -1.6937980 |

**D**

|    |            |            |            |
|----|------------|------------|------------|
| C  | 3.4961092  | 1.6046358  | -3.1124394 |
| C  | 3.7367782  | 0.7561126  | -2.0310814 |
| C  | 2.6702094  | 0.2245183  | -1.2978982 |
| C  | 1.3295753  | 0.5229628  | -1.6085100 |
| C  | 1.1180714  | 1.3826901  | -2.6986242 |
| C  | 2.1711808  | 1.9232734  | -3.4508115 |
| Ir | -0.3477535 | -0.1594163 | -0.4558475 |
| N  | -0.8736066 | 2.0040880  | -0.2857612 |
| C  | -0.1269795 | 2.7043835  | 0.6112947  |
| C  | -0.1851165 | 4.1029831  | 0.6719910  |
| C  | -1.0119528 | 4.7934946  | -0.2075403 |
| C  | -1.7699574 | 4.0672224  | -1.1262215 |
| C  | -1.6762179 | 2.6785503  | -1.1274334 |
| C  | 0.7470212  | 1.8981296  | 1.4721856  |
| N  | 0.7495274  | 0.5593497  | 1.2208427  |
| C  | 1.5325801  | -0.2518280 | 1.9497408  |
| C  | 2.4292141  | 0.2187831  | 2.9024116  |
| C  | 2.4112976  | 1.5869261  | 3.2034333  |
| C  | 1.5557511  | 2.4195657  | 2.4946820  |
| B  | -1.5299068 | -0.8913882 | 1.1794831  |
| O  | -2.3807194 | -0.1017536 | 1.9516810  |
| C  | -2.6624841 | -0.7870681 | 3.1905246  |
| C  | -1.8652272 | -2.1126801 | 3.1111055  |
| O  | -1.2056649 | -2.0799967 | 1.8288265  |
| B  | -2.3129452 | -0.7970693 | -0.8432825 |
| O  | -2.8115057 | -2.0986919 | -0.9688414 |
| C  | -4.2225673 | -2.0188420 | -1.2328805 |
| C  | -4.4589512 | -0.5558881 | -1.6529553 |

## SUPPORTING INFORMATION

---

|   |            |            |            |
|---|------------|------------|------------|
| O | -3.3085133 | 0.1491084  | -1.1517881 |
| B | 0.4590039  | -2.0394586 | -0.6614659 |
| O | 1.5746058  | -2.5114864 | 0.0868457  |
| C | 1.7591800  | -3.9126623 | -0.2161862 |
| C | 0.9874080  | -4.1127359 | -1.5306584 |
| O | 0.0714996  | -3.0049381 | -1.5842840 |
| H | -0.9695356 | -0.5700090 | -1.8874755 |
| H | -2.2611058 | 2.0608295  | -1.8052367 |
| H | 0.4262056  | 4.6489979  | 1.3883256  |
| H | -2.4214800 | 4.5631055  | -1.8441312 |
| H | -1.0555150 | 5.8824481  | -0.1822210 |
| H | 1.5301205  | 3.4846492  | 2.7166782  |
| H | 3.0790802  | 1.9688923  | 3.9759386  |
| H | 1.4220502  | -1.3095676 | 1.7185311  |
| H | -5.3699334 | -0.1222526 | -1.2158350 |
| H | -4.5012694 | -0.4422244 | -2.7495234 |
| H | -4.7730432 | -2.2778681 | -0.3126214 |
| H | -4.4873771 | -2.7410977 | -2.0182571 |
| H | 4.7662199  | 0.5177970  | -1.7508326 |
| H | 4.3332170  | 2.0500683  | -3.6536561 |
| H | 0.1077606  | 1.6707081  | -2.9945691 |
| H | 3.3841732  | 2.1501961  | -5.6902082 |
| H | -2.3416927 | -0.1500615 | 4.0285452  |
| H | -3.7481465 | -0.9479211 | 3.2686169  |
| H | -1.1021711 | -2.1942385 | 3.8999940  |
| H | -2.5125953 | -3.0009790 | 3.1560028  |
| H | 2.8341705  | -4.1280153 | -0.3008221 |
| H | 1.3358724  | -4.5096469 | 0.6078944  |
| H | 1.6499110  | -4.0714094 | -2.4113696 |
| H | 0.4221109  | -5.0554097 | -1.5552116 |
| C | 7.0337337  | -4.4446599 | 3.3805372  |
| C | 6.1848225  | -4.1126662 | 4.4347509  |
| C | 5.0978282  | -3.2366312 | 4.2592127  |
| C | 4.8322399  | -2.6757127 | 3.0084521  |
| C | 5.6911593  | -3.0021566 | 1.9481868  |
| C | 6.7974541  | -3.8787043 | 2.1159757  |
| N | 3.7610193  | -1.7830640 | 2.7661654  |
| N | 5.7006365  | -2.5730383 | 0.6369046  |
| C | 6.8032939  | -3.1182001 | -0.0228200 |
| C | 7.4894706  | -3.9383440 | 0.8526604  |
| C | 3.4473606  | -0.6819309 | 3.5387022  |
| O | 3.9827356  | -0.4072624 | 4.6087767  |
| C | 8.7283111  | -4.7346890 | 0.5918114  |
| H | 7.8760601  | -5.1202974 | 3.5359752  |
| H | 6.3614169  | -4.5352893 | 5.4244709  |
| H | 4.4580845  | -2.9735118 | 5.0987361  |
| H | 5.1118924  | -1.8437077 | 0.2514452  |
| H | 9.5362723  | -4.4479846 | 1.2836486  |
| H | 8.5515479  | -5.8125978 | 0.7348138  |
| H | 9.1025876  | -4.5929196 | -0.4305613 |
| H | 3.2782397  | -1.8866661 | 1.8732175  |
| C | 7.0749780  | -2.7557841 | -1.4430797 |
| H | 7.9661263  | -3.2780906 | -1.8100636 |
| H | 7.2529236  | -1.6736728 | -1.5557335 |
| H | 6.2325625  | -3.0207620 | -2.1011056 |
| C | 1.8134025  | 2.8559294  | -4.5718477 |
| O | 0.7963009  | 3.5563492  | -4.5545534 |
| N | 2.6954067  | 2.8913058  | -5.6239418 |
| C | 2.4279961  | 3.6997810  | -6.8011008 |
| H | 3.3596604  | 3.8478937  | -7.3615628 |
| H | 1.6778667  | 3.2359387  | -7.4629223 |
| H | 2.0350689  | 4.6728440  | -6.4827140 |
| H | 2.8883420  | -0.4469472 | -0.4628404 |

**TS-CD**

|   |           |           |            |
|---|-----------|-----------|------------|
| C | 3.8198333 | 1.6349854 | -2.7964066 |
| C | 3.9792379 | 0.4782229 | -2.0149197 |

## SUPPORTING INFORMATION

---

|    |            |            |            |
|----|------------|------------|------------|
| C  | 2.8557569  | -0.1486854 | -1.4443175 |
| C  | 1.5630324  | 0.3731536  | -1.6408750 |
| C  | 1.4127170  | 1.5143165  | -2.4399570 |
| C  | 2.5274601  | 2.1593749  | -3.0175453 |
| Ir | -0.2174313 | -0.3578239 | -0.1415559 |
| N  | -0.8124258 | 1.8406803  | -0.2971815 |
| C  | 0.0557972  | 2.6848228  | 0.3350159  |
| C  | 0.1527515  | 4.0430479  | -0.0253867 |
| C  | -0.6708177 | 4.5476639  | -1.0362838 |
| C  | -1.6047389 | 3.6885984  | -1.6318550 |
| C  | -1.6406017 | 2.3444581  | -1.2366672 |
| C  | 0.9094814  | 2.0627143  | 1.3654483  |
| N  | 0.8114134  | 0.7050819  | 1.4610619  |
| C  | 1.5647618  | 0.0376229  | 2.3490207  |
| C  | 2.5922266  | 0.6506842  | 3.0793976  |
| C  | 2.6716037  | 2.0569947  | 3.0407064  |
| C  | 1.8022181  | 2.7650110  | 2.2049079  |
| B  | -1.5259523 | -1.1196218 | 1.3149965  |
| O  | -2.8715501 | -0.8007728 | 1.5025350  |
| C  | -3.4060576 | -1.6811387 | 2.5021457  |
| C  | -2.1631000 | -2.2521608 | 3.2201917  |
| O  | -1.0829891 | -2.0152255 | 2.3011398  |
| B  | -1.8490391 | -1.1694630 | -1.1368525 |
| O  | -2.4135107 | -2.4346622 | -0.9752264 |
| C  | -3.7214242 | -2.4204675 | -1.5513656 |
| C  | -3.7159630 | -1.1981438 | -2.4950107 |
| O  | -2.6231730 | -0.3982429 | -2.0205455 |
| B  | 0.6103243  | -2.2183652 | 0.0585717  |
| O  | 1.7298677  | -2.5191920 | 0.9275257  |
| C  | 1.6882145  | -3.9474843 | 1.1581760  |
| C  | 1.0287240  | -4.4821490 | -0.1188566 |
| O  | 0.2270968  | -3.3907427 | -0.5776632 |
| H  | 0.0337200  | -0.6899291 | -1.7086160 |
| H  | -2.3096361 | 1.6084274  | -1.7082176 |
| H  | 0.9003641  | 4.6907276  | 0.4512243  |
| H  | -2.2749117 | 4.0380889  | -2.4294512 |
| H  | -0.5693049 | 5.5900440  | -1.3682049 |
| H  | 1.8470518  | 3.8615260  | 2.1661758  |
| H  | 3.4417721  | 2.5613421  | 3.6434866  |
| H  | 1.3533795  | -1.0381524 | 2.4095979  |
| H  | -4.6579045 | -0.6122638 | -2.4551306 |
| H  | -3.5275531 | -1.4834998 | -3.5547271 |
| H  | -4.4746228 | -2.3044138 | -0.7385847 |
| H  | -3.9177382 | -3.3778873 | -2.0777317 |
| H  | 4.9871459  | 0.0778468  | -1.8195957 |
| H  | 4.7088280  | 2.1511657  | -3.1931009 |
| H  | 0.4242970  | 1.9587811  | -2.6269362 |
| H  | 3.8385575  | 2.9904810  | -5.0424549 |
| H  | -4.0821464 | -1.1196867 | 3.1799432  |
| H  | -3.9973589 | -2.4815392 | 2.0023672  |
| H  | -1.9506528 | -1.7260049 | 4.1779471  |
| H  | -2.2445224 | -3.3383226 | 3.4320451  |
| H  | 2.7126491  | -4.3320992 | 1.3362831  |
| H  | 1.0624005  | -4.1387789 | 2.0569234  |
| H  | 1.7827571  | -4.7470379 | -0.8961224 |
| H  | 0.3912508  | -5.3720949 | 0.0611507  |
| C  | 7.4525918  | -3.6684185 | 2.6517160  |
| C  | 7.1590137  | -3.0297171 | 3.8637237  |
| C  | 5.9752215  | -2.2740638 | 4.0467467  |
| C  | 5.0444480  | -2.1482596 | 3.0001908  |
| C  | 5.3404943  | -2.7935809 | 1.7745830  |
| C  | 6.5348178  | -3.5515642 | 1.5815163  |
| N  | 3.8679841  | -1.3717480 | 3.0598069  |
| N  | 4.6502748  | -2.7866586 | 0.5768605  |
| C  | 5.3510318  | -3.5347576 | -0.3683739 |
| C  | 6.5234594  | -4.0168925 | 0.2103746  |
| C  | 3.7052819  | -0.1536556 | 3.7038766  |

## SUPPORTING INFORMATION

|   |           |            |            |
|---|-----------|------------|------------|
| O | 4.4477440 | 0.2918669  | 4.5754518  |
| C | 7.5988683 | -4.8414578 | -0.4304766 |
| H | 8.3836027 | -4.2421688 | 2.5282010  |
| H | 7.8664249 | -3.1071593 | 4.7034167  |
| H | 5.7764646 | -1.7571794 | 4.9930987  |
| H | 3.6888525 | -2.4445165 | 0.4474560  |
| H | 8.5853595 | -4.3314767 | -0.3826061 |
| H | 7.7220848 | -5.8202284 | 0.0817627  |
| H | 7.3850784 | -5.0509723 | -1.4970772 |
| H | 3.1770300 | -1.5841242 | 2.3303570  |
| C | 4.7995239 | -3.6859891 | -1.7503324 |
| H | 5.5055746 | -4.2349873 | -2.4004653 |
| H | 4.5967657 | -2.6992297 | -2.2195989 |
| H | 3.8376551 | -4.2441178 | -1.7521739 |
| C | 2.2623522 | 3.4289317  | -3.7868246 |
| O | 1.3017540 | 4.1636003  | -3.5258747 |
| N | 3.1558375 | 3.7080210  | -4.7971398 |
| C | 3.0318909 | 4.8737453  | -5.6493970 |
| H | 3.9644793 | 5.4773455  | -5.6564222 |
| H | 2.7851291 | 4.5969284  | -6.6975991 |
| H | 2.2057964 | 5.4901358  | -5.2469117 |
| H | 2.9983190 | -1.0348468 | -0.8098152 |

**E**

|    |            |            |            |
|----|------------|------------|------------|
| C  | 2.4554303  | 2.2861134  | -1.5989489 |
| C  | 3.1625081  | 1.0829529  | -1.3740214 |
| C  | 2.6181582  | -0.1328159 | -1.7627755 |
| C  | 1.3494573  | -0.1881537 | -2.3760935 |
| C  | 0.6566667  | 1.0093990  | -2.6311395 |
| C  | 1.2274254  | 2.2364245  | -2.2594857 |
| Ir | -0.4407021 | -0.0948782 | -0.3315772 |
| N  | -0.9889245 | 2.0604901  | -0.2317267 |
| C  | -0.1572519 | 2.8516284  | 0.5035118  |
| C  | -0.2785196 | 4.2470544  | 0.4854409  |
| C  | -1.2824988 | 4.8399661  | -0.2710349 |
| C  | -2.1573003 | 4.0187245  | -0.9851902 |
| C  | -1.9767997 | 2.6388045  | -0.9411047 |
| C  | 0.8970930  | 2.1537128  | 1.2556100  |
| N  | 1.0014754  | 0.8192275  | 1.0200099  |
| C  | 1.9651022  | 0.1198826  | 1.6407852  |
| C  | 2.9030340  | 0.7013368  | 2.4942077  |
| C  | 2.7621579  | 2.0665322  | 2.7885629  |
| C  | 1.7521810  | 2.7883301  | 2.1704908  |
| B  | -1.6285285 | -0.5912873 | 1.2283710  |
| O  | -1.3505886 | -0.0792213 | 2.5082020  |
| C  | -2.4204356 | -0.4752687 | 3.3888487  |
| C  | -3.1721479 | -1.5714497 | 2.6101508  |
| O  | -2.7813013 | -1.3758960 | 1.2380541  |
| B  | -1.9016880 | -0.8365464 | -1.5655085 |
| O  | -2.3529686 | -2.1547726 | -1.6966115 |
| C  | -3.5320374 | -2.1683869 | -2.5165446 |
| C  | -3.4913335 | -0.8272174 | -3.2679561 |
| O  | -2.6181051 | -0.0018782 | -2.4678702 |
| B  | 0.1841695  | -2.0379342 | -0.1773626 |
| O  | 0.2968076  | -2.7162978 | 1.0593717  |
| C  | 0.9087889  | -4.0020609 | 0.8371821  |
| C  | 0.8312768  | -4.1996811 | -0.6847602 |
| O  | 0.6709329  | -2.8689689 | -1.2072373 |
| H  | 0.9636362  | -1.1426529 | -2.7275619 |
| H  | -2.5985029 | 1.9494904  | -1.5140306 |
| H  | 0.4343743  | 4.8674685  | 1.0243986  |
| H  | -2.9600702 | 4.4367804  | -1.5917234 |
| H  | -1.3703410 | 5.9254417  | -0.3132257 |
| H  | 1.6319547  | 3.8477953  | 2.3885283  |
| H  | 3.4487131  | 2.5268705  | 3.4993198  |
| H  | 1.9251427  | -0.9559315 | 1.4626543  |
| H  | -4.4771979 | -0.3466690 | -3.3516035 |

## SUPPORTING INFORMATION

---

|          |            |            |            |
|----------|------------|------------|------------|
| H        | -3.0594585 | -0.9290288 | -4.2782422 |
| H        | -4.4192754 | -2.2485971 | -1.8650626 |
| H        | -3.5055262 | -3.0385415 | -3.1887416 |
| H        | 4.1502196  | 1.1047389  | -0.9091704 |
| H        | 3.1548777  | -1.0665584 | -1.5883590 |
| H        | -0.2971197 | 0.9850456  | -3.1581436 |
| H        | 4.0320043  | 2.7677061  | 0.3718099  |
| H        | -1.9978439 | -0.8350491 | 4.3381774  |
| H        | -3.0584508 | 0.4014453  | 3.5938134  |
| H        | -2.8653877 | -2.5830762 | 2.9239203  |
| H        | -4.2654161 | -1.4884796 | 2.6946599  |
| H        | 1.9511813  | -3.9738928 | 1.2017229  |
| H        | 0.3627394  | -4.7710650 | 1.4018479  |
| H        | 1.7368317  | -4.6578770 | -1.1088760 |
| H        | -0.0447275 | -4.8028676 | -0.9755812 |
| C        | 7.3441310  | -4.1340461 | 3.3694823  |
| C        | 6.6342447  | -3.4936218 | 4.3834130  |
| C        | 5.6730187  | -2.5052527 | 4.1056950  |
| C        | 5.4000768  | -2.1313544 | 2.7861821  |
| C        | 6.1356283  | -2.7548655 | 1.7668837  |
| C        | 7.1030492  | -3.7582417 | 2.0375559  |
| N        | 4.4069137  | -1.1915464 | 2.4264811  |
| N        | 6.0902194  | -2.5820997 | 0.3948825  |
| C        | 7.0467394  | -3.4082874 | -0.2048577 |
| C        | 7.6664669  | -4.1610026 | 0.7719144  |
| C        | 4.0229973  | -0.0691929 | 3.1313263  |
| O        | 4.5584117  | 0.3088599  | 4.1704897  |
| C        | 8.7218707  | -5.2059598 | 0.5991852  |
| H        | 8.0798807  | -4.9043073 | 3.6042410  |
| H        | 6.8161040  | -3.7646366 | 5.4239835  |
| H        | 5.1332557  | -2.0180715 | 4.9138414  |
| H        | 5.6954176  | -1.7723358 | -0.0690731 |
| H        | 9.6187220  | -4.9639616 | 1.1906924  |
| H        | 8.3696180  | -6.1925844 | 0.9396077  |
| H        | 9.0330769  | -5.3084060 | -0.4485101 |
| H        | 3.9156423  | -1.3727075 | 1.5549011  |
| C        | 7.2385235  | -3.3692885 | -1.6822808 |
| H        | 8.0416442  | -4.0510907 | -1.9848548 |
| H        | 7.5120339  | -2.3593447 | -2.0290278 |
| H        | 6.3240028  | -3.6664778 | -2.2195559 |
| C        | 2.9188236  | 3.6316101  | -1.1196274 |
| O        | 2.4422291  | 4.6870027  | -1.5476637 |
| N        | 3.8908497  | 3.6266600  | -0.1500976 |
| C        | 4.2794885  | 4.8695106  | 0.4941252  |
| H        | 5.1782946  | 4.6982688  | 1.0977697  |
| H        | 4.4899244  | 5.6253482  | -0.2714121 |
| H        | 3.4786768  | 5.2661904  | 1.1419510  |
| H        | 0.7038874  | 3.1753775  | -2.4412135 |
| <b>F</b> |            |            |            |
| C        | 3.8103749  | 1.5613137  | -2.6868651 |
| C        | 3.9327314  | 0.9968116  | -1.4086817 |
| C        | 2.8089194  | 0.4966760  | -0.7465013 |
| C        | 1.5217413  | 0.5157212  | -1.3161852 |
| C        | 1.4252380  | 1.0881268  | -2.6026230 |
| C        | 2.5335144  | 1.6108424  | -3.2668812 |
| Ir       | -0.2341730 | -0.1970140 | -0.3130975 |
| N        | -0.8966085 | 1.9445729  | -0.3420801 |
| C        | -0.2382897 | 2.7551614  | 0.5331891  |
| C        | -0.3878436 | 4.1477327  | 0.4893612  |
| C        | -1.2180227 | 4.7187218  | -0.4687834 |
| C        | -1.8856408 | 3.8804699  | -1.3633673 |
| C        | -1.6998680 | 2.5045001  | -1.2641643 |
| C        | 0.6323295  | 2.0686681  | 1.4949856  |
| N        | 0.6187791  | 0.7092131  | 1.4228733  |
| C        | 1.3990501  | -0.0083520 | 2.2432673  |
| C        | 2.3797709  | 0.5698147  | 3.0446754  |

## SUPPORTING INFORMATION

---

|   |            |            |            |
|---|------------|------------|------------|
| C | 2.3811071  | 1.9659171  | 3.1652958  |
| C | 1.4755625  | 2.7093231  | 2.4172428  |
| B | -1.5077138 | -1.0053542 | 1.2145742  |
| O | -2.5566022 | -0.3481526 | 1.8573425  |
| C | -2.7817315 | -0.9978847 | 3.1300314  |
| C | -2.0284750 | -2.3352384 | 3.0180977  |
| O | -1.0936470 | -2.1281151 | 1.9364281  |
| B | -2.1000829 | -1.0010192 | -0.8596883 |
| O | -2.4963253 | -2.3416302 | -0.9279499 |
| C | -3.8743165 | -2.3825521 | -1.3393985 |
| C | -4.1469709 | -0.9840797 | -1.9206776 |
| O | -3.1081362 | -0.1578462 | -1.3595054 |
| B | 0.7173547  | -2.0169751 | -0.3227435 |
| O | 1.8211969  | -2.3527779 | 0.5252196  |
| C | 1.9855773  | -3.7939490 | 0.4542809  |
| C | 1.3795312  | -4.1488628 | -0.9045773 |
| O | 0.4355071  | -3.0909388 | -1.1565322 |
| H | -0.6437381 | -0.7371354 | -1.7734434 |
| H | -2.2140243 | 1.8015366  | -1.9167147 |
| H | 0.1459115  | 4.7802536  | 1.1964934  |
| H | -2.5462595 | 4.2807005  | -2.1315696 |
| H | -1.3389980 | 5.8008627  | -0.5184325 |
| H | 1.4719321  | 3.7948314  | 2.4953587  |
| H | 3.1200694  | 2.4414363  | 3.8109206  |
| H | 1.2580876  | -1.0842788 | 2.1747751  |
| H | -5.1277499 | -0.5794031 | -1.6333171 |
| H | -4.0622865 | -0.9697049 | -3.0203121 |
| H | -4.5026684 | -2.5915121 | -0.4574271 |
| H | -4.0107372 | -3.1901646 | -2.0722779 |
| H | 4.8971185  | 0.9766954  | -0.8947376 |
| H | 2.9513489  | 0.1010707  | 0.2614510  |
| H | 0.4527551  | 1.1369890  | -3.0975760 |
| H | 6.3041428  | 0.9155006  | -2.5010913 |
| H | -2.3738709 | -0.3553619 | 3.9275224  |
| H | -3.8618414 | -1.1199529 | 3.2901338  |
| H | -1.4769472 | -2.5997761 | 3.9309289  |
| H | -2.6962316 | -3.1695167 | 2.7483136  |
| H | 3.0502322  | -4.0454638 | 0.5480105  |
| H | 1.4239192  | -4.2461604 | 1.2869456  |
| H | 2.1383645  | -4.1530265 | -1.7060300 |
| H | 0.8558712  | -5.1146755 | -0.9041609 |
| C | 7.3375303  | -3.6305298 | 2.3219639  |
| C | 6.9307905  | -3.2076430 | 3.5863833  |
| C | 5.7581746  | -2.4514387 | 3.7762758  |
| C | 4.9625866  | -2.0978379 | 2.6836450  |
| C | 5.3819575  | -2.5052180 | 1.4039484  |
| C | 6.5586413  | -3.2778075 | 1.2048785  |
| N | 3.7715359  | -1.3483199 | 2.7711091  |
| N | 4.8441566  | -2.2445859 | 0.1613074  |
| C | 5.6213367  | -2.8526686 | -0.8187934 |
| C | 6.6889141  | -3.4941559 | -0.2149421 |
| C | 3.5358730  | -0.2417272 | 3.5634419  |
| O | 4.2416008  | 0.1238025  | 4.4985113  |
| C | 7.7886644  | -4.2674385 | -0.8702710 |
| H | 8.2485824  | -4.2177977 | 2.1989070  |
| H | 7.5288543  | -3.4686886 | 4.4602496  |
| H | 5.4613578  | -2.1244201 | 4.7701447  |
| H | 3.9488280  | -1.7970815 | -0.0263073 |
| H | 8.7756571  | -3.8290478 | -0.6524231 |
| H | 7.8149558  | -5.3079186 | -0.5089745 |
| H | 7.6720681  | -4.3008762 | -1.9614959 |
| H | 3.1100649  | -1.5182955 | 2.0095985  |
| C | 5.2154733  | -2.7354466 | -2.2492188 |
| H | 6.0125923  | -3.0899046 | -2.9130958 |
| H | 4.9797122  | -1.6923230 | -2.5134293 |
| H | 4.3117555  | -3.3290638 | -2.4638491 |
| C | 4.9545281  | 2.1521013  | -3.4543640 |

## SUPPORTING INFORMATION

---

|   |           |           |            |
|---|-----------|-----------|------------|
| O | 4.7896384 | 2.9862271 | -4.3503590 |
| N | 6.2102429 | 1.7242712 | -3.1043033 |
| C | 7.3818224 | 2.2100981 | -3.8134064 |
| H | 8.2843500 | 1.8846870 | -3.2820949 |
| H | 7.4158959 | 1.8406652 | -4.8511552 |
| H | 7.3594552 | 3.3070248 | -3.8538773 |
| H | 2.4345014 | 2.0719274 | -4.2510497 |

## TS-EF

|    |            |            |            |
|----|------------|------------|------------|
| C  | 4.2090061  | 0.8280511  | -2.5318092 |
| C  | 4.1314888  | 0.6233507  | -1.1402058 |
| C  | 2.8859360  | 0.4333034  | -0.5207460 |
| C  | 1.6937025  | 0.4503102  | -1.2678162 |
| C  | 1.7674165  | 0.7328118  | -2.6482550 |
| C  | 3.0116341  | 0.9306635  | -3.2708783 |
| Ir | -0.2724613 | -0.1741232 | 0.1628300  |
| N  | -0.9805838 | 1.9812254  | 0.2166080  |
| C  | -0.4302489 | 2.7735094  | 1.1843589  |
| C  | -0.7669752 | 4.1383637  | 1.2964470  |
| C  | -1.6784441 | 4.6985493  | 0.3958503  |
| C  | -2.2256419 | 3.8784995  | -0.6042825 |
| C  | -1.8513062 | 2.5298204  | -0.6578562 |
| C  | 0.5397679  | 2.1075115  | 2.0734527  |
| N  | 0.6200457  | 0.7528617  | 1.9291361  |
| C  | 1.5278797  | 0.0605505  | 2.6381884  |
| C  | 2.5404836  | 0.6793023  | 3.3856208  |
| C  | 2.4326596  | 2.0685019  | 3.5994458  |
| C  | 1.4010266  | 2.7752357  | 2.9719395  |
| B  | -1.7613866 | -1.0312185 | 1.3495918  |
| O  | -3.0601228 | -0.5411941 | 1.4893391  |
| C  | -3.7504494 | -1.3456950 | 2.4573861  |
| C  | -2.8187033 | -2.5584165 | 2.6998333  |
| O  | -1.5535227 | -2.1550355 | 2.1547000  |
| B  | -1.6852055 | -0.8608997 | -1.1876699 |
| O  | -2.3992671 | -2.0559137 | -1.1291710 |
| C  | -3.4924779 | -1.9865656 | -2.0479081 |
| C  | -3.1421165 | -0.8048115 | -2.9811949 |
| O  | -2.1370321 | -0.0716951 | -2.2627533 |
| B  | 0.5463188  | -2.0510743 | 0.2387883  |
| O  | 1.6627460  | -2.4041088 | 1.0843659  |
| C  | 1.7698569  | -3.8459551 | 1.0773848  |
| C  | 1.1193075  | -4.2346900 | -0.2582617 |
| O  | 0.2314138  | -3.1500636 | -0.5479206 |
| H  | 0.2479265  | -0.4439998 | -1.3454914 |
| H  | -2.2374176 | 1.8425356  | -1.4264165 |
| H  | -0.3211720 | 4.7547248  | 2.0887216  |
| H  | -2.9393124 | 4.2727257  | -1.3416308 |
| H  | -1.9544754 | 5.7607019  | 0.4718291  |
| H  | 1.3192736  | 3.8615582  | 3.1110640  |
| H  | 3.1977781  | 2.5718069  | 4.2092384  |
| H  | 1.4660255  | -1.0292387 | 2.5145093  |
| H  | -4.0097652 | -0.1460664 | -3.1942210 |
| H  | -2.7183592 | -1.1450854 | -3.9522586 |
| H  | -4.4332131 | -1.8015039 | -1.4813207 |
| H  | -3.5954937 | -2.9503620 | -2.5886770 |
| H  | 5.0467314  | 0.5895968  | -0.5273665 |
| H  | 2.8711336  | 0.2538351  | 0.5643449  |
| H  | 0.8446666  | 0.7708549  | -3.2501880 |
| H  | 6.3627269  | -0.4235512 | -1.9456734 |
| H  | -3.9124822 | -0.7482770 | 3.3829631  |
| H  | -4.7450228 | -1.6412056 | 2.0619480  |
| H  | -2.7045260 | -2.8108928 | 3.7750144  |
| H  | -3.1704348 | -3.4676024 | 2.1632529  |
| H  | 2.8360564  | -4.1397597 | 1.1608550  |
| H  | 1.2091578  | -4.2475849 | 1.9490877  |
| H  | 1.8738749  | -4.3229173 | -1.0727885 |
| H  | 0.5521787  | -5.1864467 | -0.2033058 |

SUPPORTING INFORMATION

---

|   |           |            |            |
|---|-----------|------------|------------|
| C | 7.8485263 | -2.2649189 | 1.2603333  |
| C | 7.7503705 | -1.8481725 | 2.5934793  |
| C | 6.5109349 | -1.4971788 | 3.1825493  |
| C | 5.3192223 | -1.5820459 | 2.4404364  |
| C | 5.4103838 | -2.0539309 | 1.1051457  |
| C | 6.6654524 | -2.3557869 | 0.4898800  |
| N | 4.0600010 | -1.1276977 | 2.8950652  |
| N | 4.4300918 | -2.2133802 | 0.1471095  |
| C | 5.0081365 | -2.5436213 | -1.0707500 |
| C | 6.3902373 | -2.6586926 | -0.8995745 |
| C | 3.8373359 | -0.0232310 | 3.7112710  |
| O | 4.6609610 | 0.4478702  | 4.4911848  |
| C | 7.4036295 | -3.0608112 | -1.9297811 |
| H | 8.8256182 | -2.5058075 | 0.8151867  |
| H | 8.6607706 | -1.7702402 | 3.2069045  |
| H | 6.4644172 | -1.1207626 | 4.2108342  |
| H | 3.4316435 | -1.9945429 | 0.2643053  |
| H | 8.3147978 | -2.4296150 | -1.8700514 |
| H | 7.7360898 | -4.1133995 | -1.7948918 |
| H | 7.0026061 | -2.9721245 | -2.9591764 |
| H | 3.2690858 | -1.4154881 | 2.3079337  |
| C | 4.1584958 | -2.6994527 | -2.2924758 |
| H | 4.7023243 | -2.3455376 | -3.1900390 |
| H | 3.2326272 | -2.0940914 | -2.2101531 |
| H | 3.8666467 | -3.7570010 | -2.4732499 |
| C | 5.5193080 | 0.9408604  | -3.2689063 |
| O | 5.6338410 | 1.6013812  | -4.3058653 |
| N | 6.5612564 | 0.2367719  | -2.7058943 |
| C | 7.8916843 | 0.2489701  | -3.2788655 |
| H | 8.6599144 | 0.3935086  | -2.4911454 |
| H | 8.1245207 | -0.6923336 | -3.8238709 |
| H | 7.9436511 | 1.0852256  | -4.0019139 |
| H | 3.0851539 | 1.1376274  | -4.3497624 |



## SUPPORTING INFORMATION

## Aromatic compounds 1s-31s

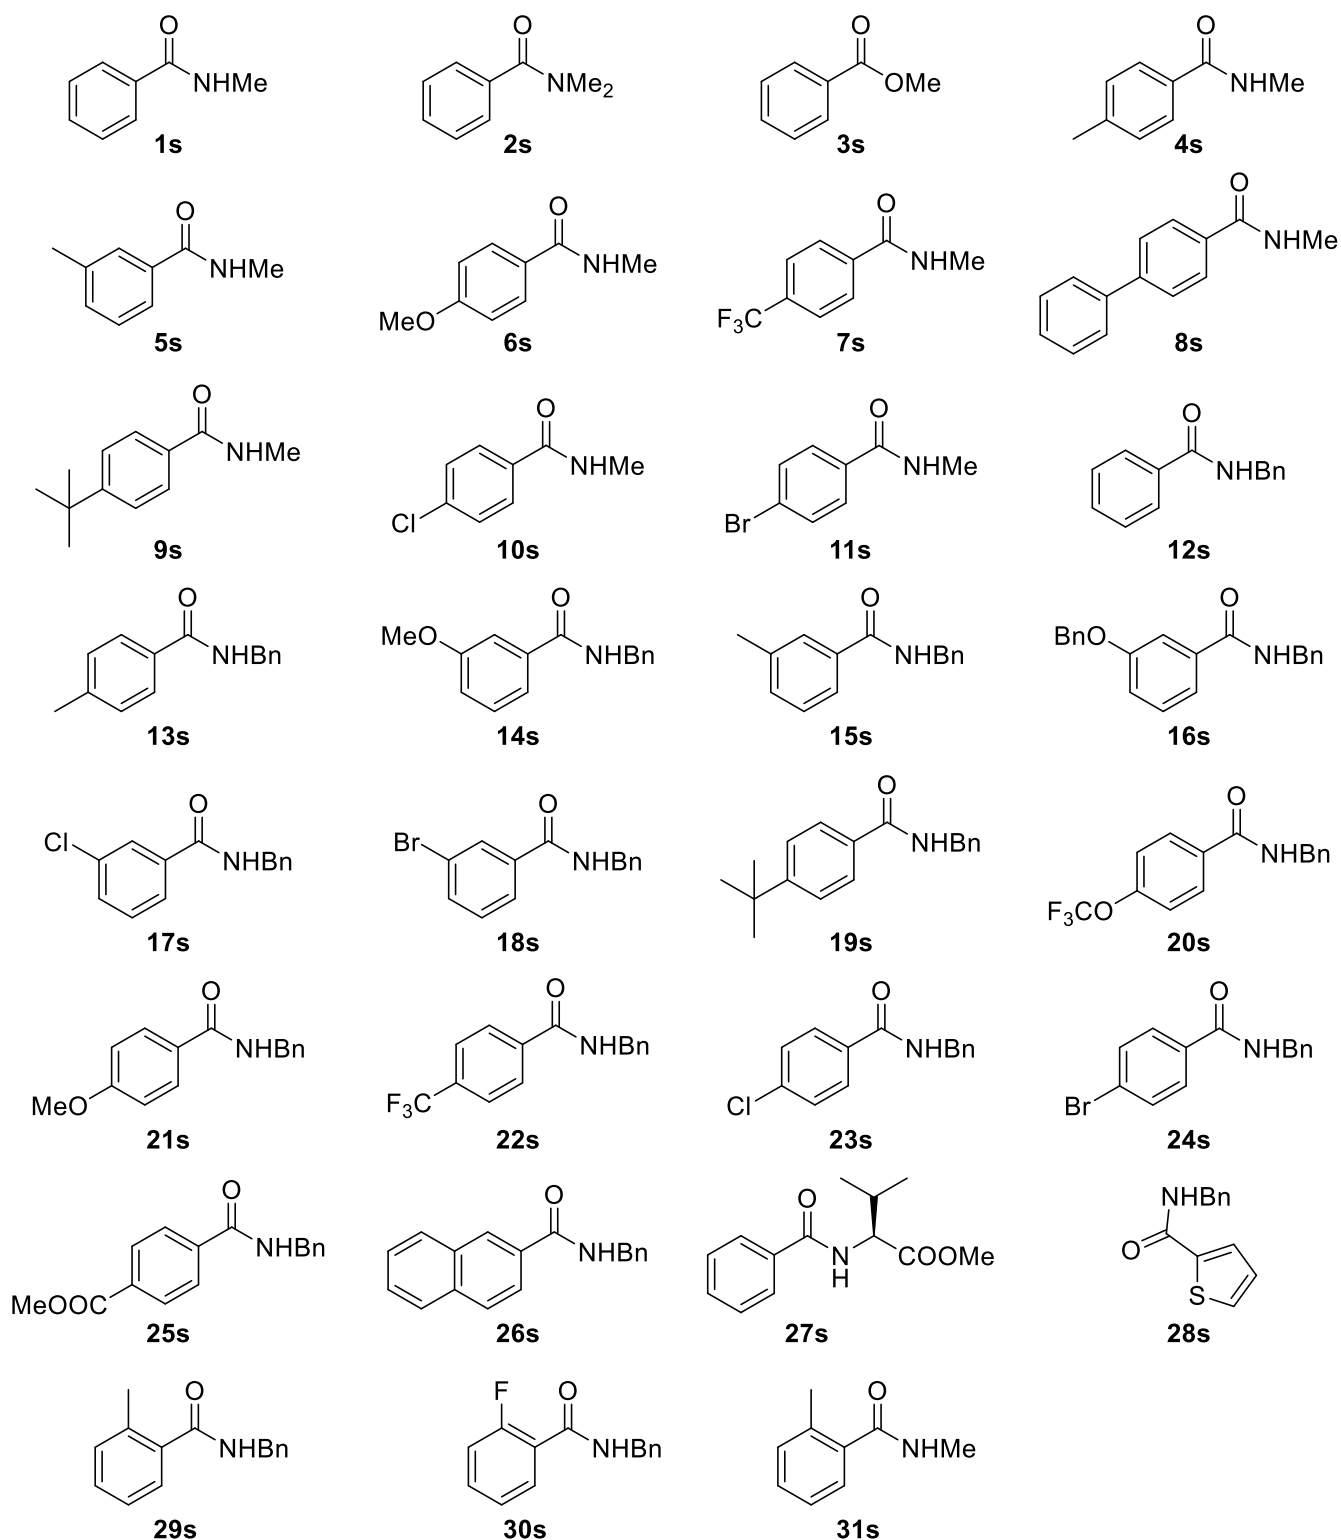

General procedures **A** for the synthesis of substrates: To a dichloromethane solution of benzoic acid derivative (1 eq.), 1 drop of DMF and oxalyl chloride (1.5 eq.) were added slowly. The reaction mixture was stirred vigorously for 1-2 hours. After the suspension becoming homogeneous solution, the volatiles were removed under vacuum. The resulting crude acyl chloride was re-dissolved in dichloromethane.  $\text{MeNH}_2$  (1.5 eq.) in water and TEA (3 eq.) was added sequentially dropwise into the reaction mixture under ice-water bath and then stirred at room temperature overnight. Water was added into the suspension and the resulting mixture was extracted with ethyl acetate (3x100 mL). The combined organic phase was dried over  $\text{MgSO}_4$ , filtrated and evaporated. The pure product was obtained after crystallization using ethyl acetate and hexane or pentane mixture.

## SUPPORTING INFORMATION

General procedures **B** for the synthesis of substrates: Benzoic acid derivative (1 eq.), benzylamine (1.0 eq.) and EDC (1.5 eq.) were dissolved in DMF followed by vigorously stirring overnight. Then 1M HCl solution was added into the suspension and the resulting mixture was extracted with ethyl acetate (300 mL), followed by washing with 1M HCl solution two times and then Na<sub>2</sub>CO<sub>3</sub> saturated solution three times (3x200mL). The organic phase was dried over MgSO<sub>4</sub>, filtered and evaporated. The pure product was obtained after crystallization using ethyl acetate and hexane or pentane mixture.

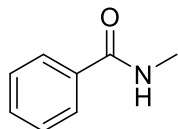**1s**

*N*-Methylbenzamide (**1s**)<sup>[10]</sup>

Obtained from commercial source.

<sup>1</sup>H NMR (400 MHz, CDCl<sub>3</sub>) δ 7.78 – 7.74 (m, 2H), 7.51 – 7.47 (m, 1H), 7.47 – 7.40 (m, 2H), 6.18 (brs, 1H), 3.02 (d, *J* = 4.8 Hz, 3H).

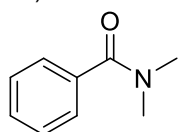**2s**

*N*-Dimethylbenzamide (**2s**)<sup>[11]</sup>

Obtained from commercial source.

<sup>1</sup>H NMR (400 MHz, CDCl<sub>3</sub>) δ 7.42 – 7.38 (m, 5H), 3.11 (s, 3H), 2.98 (s, 3H).

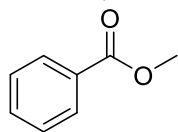**3s**

Methyl benzoate (**3s**)<sup>[12]</sup>

<sup>1</sup>H NMR (400 MHz, CDCl<sub>3</sub>) δ 8.06 – 8.03 (m, 2H), 7.58 – 7.54 (m, 1H), 7.46 – 7.42 (m, 2H), 3.92 (s, 3H).

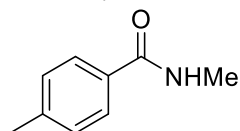**4s**

*N*,4-dimethylbenzamide (**4s**)

General procedures **A**; Yield of 85%.

<sup>1</sup>H NMR (500 MHz, CDCl<sub>3</sub>) δ 7.65 (d, *J* = 7.5 Hz, 2H), 7.16 (d, *J* = 7.7 Hz, 2H), 6.55 (brs, 1H), 2.94 (d, *J* = 4.6 Hz, 3H), 2.35 (s, 3H).

<sup>13</sup>C NMR (126 MHz, CDCl<sub>3</sub>) δ 168.36, 141.65, 131.94, 129.19, 126.98, 26.79, 21.43.

HRMS (EI+(eiFi)) calcd. for C<sub>9</sub>H<sub>11</sub>NO [M]<sup>+</sup> 149.0841, found 149.0851.

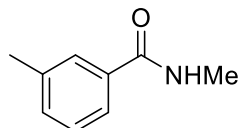**5s**

*N*,3-dimethylbenzamide (**5s**)

General procedures **A**; Yield of 98%.

<sup>1</sup>H NMR (500 MHz, CDCl<sub>3</sub>) δ 7.56 (s, 1H), 7.54 – 7.52 (m, 1H), 7.34 – 7.25 (m, 1H, amide-NH), 7.18 – 7.14 (m, 2H), 2.87 (d, *J* = 4.8 Hz, 3H), 2.24 (s, 3H).

<sup>13</sup>C NMR (126 MHz, CDCl<sub>3</sub>) δ 168.69, 137.99, 134.47, 131.79, 128.11, 127.64, 123.94, 26.61, 21.10.

HRMS (EI+(eiFi)) calcd. for C<sub>9</sub>H<sub>11</sub>NO [M]<sup>+</sup> 149.0841, found 149.0841

## SUPPORTING INFORMATION

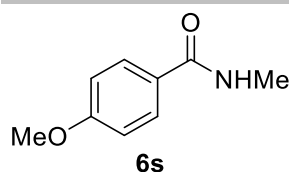4-Methoxy-*N*-methylbenzamide (**6s**)General procedures **A**; Yield of 97%. $^1\text{H}$  NMR (500 MHz,  $\text{CDCl}_3$ )  $\delta$  7.75 – 7.72 (m, 2H), 6.91 – 6.87 (m, 2H), 6.37 (brs, 1H), 3.82 (d,  $J$  = 4.7 Hz, 3H), 2.96 (s, 3H). $^{13}\text{C}$  NMR (126 MHz,  $\text{CDCl}_3$ )  $\delta$  167.95, 162.14, 128.75, 127.04, 113.79, 55.47, 26.88.HRMS (FD+(eiFi)) calcd. for  $\text{C}_9\text{H}_{11}\text{NO}_2$   $[\text{M}]^+$  165.0790, found 165.0843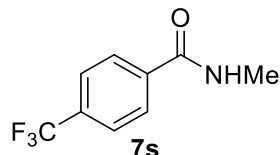*N*-Methyl-4-(trifluoromethyl)benzamide (**7s**)General procedures **A**; Yield of 87%. $^1\text{H}$  NMR (500 MHz,  $\text{CDCl}_3$ )  $\delta$  7.86 (d,  $J$  = 8.0 Hz, 2H), 7.66 (d,  $J$  = 8.1 Hz, 2H), 6.49 (brs, 1H), 3.01 (d,  $J$  = 4.7 Hz, 3H). $^{13}\text{C}$  NMR (126 MHz,  $\text{CDCl}_3$ )  $\delta$  167.14, 138.02, 133.24 (m, two bond F-C coupling), 127.48, 125.70 (m, three bonds F-C coupling), 123.79 (m, one bond C-F coupling), 27.08.HRMS (EI+(eiFi)) calcd. for  $\text{C}_9\text{H}_8\text{F}_3\text{NO}$   $[\text{M}]^+$  203.0558, found 203.0507.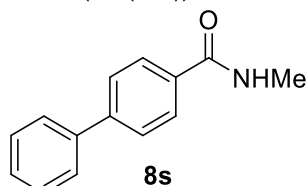*N*-Methyl-[1,1'-biphenyl]-4-carboxamide (**8s**)General procedures **A**; Yield of 83%. $^1\text{H}$  NMR (500 MHz,  $\text{CDCl}_3$ )  $\delta$  7.86 – 7.83 (m, 2H), 7.65 – 7.58 (m, 4H), 7.47 – 7.43 (m, 2H), 7.39 – 7.36 (m, 1H), 6.39 (brs, 1H), 3.03 (d,  $J$  = 4.9 Hz, 3H). $^{13}\text{C}$  NMR (126 MHz,  $\text{CDCl}_3$ )  $\delta$  168.09, 144.27, 140.19, 133.49, 129.01, 128.06, 127.51, 127.30, 26.97.HRMS (EI+(eiFi)) calcd. for  $\text{C}_{14}\text{H}_{13}\text{NO}$   $[\text{M}]^+$  211.0997, found 211.0985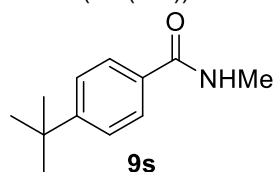4-(Tert-butyl)-*N*-methylbenzamide (**9s**)General procedures **A**; Yield of 87%. $^1\text{H}$  NMR (500 MHz,  $\text{CDCl}_3$ )  $\delta$  7.69 (d,  $J$  = 8.7 Hz, 2H), 7.42 (d,  $J$  = 8.8 Hz, 2H), 6.29 (brs, 1H), 2.99 (d,  $J$  = 5.1 Hz, 3H), 1.32 (s, 9H). $^{13}\text{C}$  NMR (126 MHz,  $\text{CDCl}_3$ )  $\delta$  168.36, 154.91, 131.87, 126.79, 125.58, 35.01, 31.29, 26.90.HRMS (EI+(eiFi)) calcd. for  $\text{C}_{12}\text{H}_{17}\text{NO}$   $[\text{M}]^+$  191.1310, found 191.1306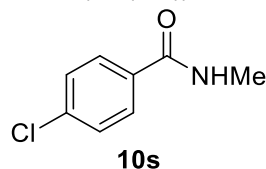4-Chloro-*N*-methylbenzamide (**10s**)General procedures **A**; Yield of 89%. $^1\text{H}$  NMR (500 MHz,  $\text{CDCl}_3$ )  $\delta$  7.69 (d,  $J$  = 8.1 Hz, 2H), 7.37 (d,  $J$  = 8.3 Hz, 2H), 6.33 (brs, 1H), 2.98 (d,  $J$  = 4.8 Hz, 3H). $^{13}\text{C}$  NMR (126 MHz,  $\text{CDCl}_3$ )  $\delta$  167.34, 137.73, 133.20, 128.92, 128.44, 26.99.HRMS (EI+(eiFi)) calcd. for  $\text{C}_8\text{H}_8\text{ClNO}$   $[\text{M}]^+$  169.0294, found 169.0293

## SUPPORTING INFORMATION

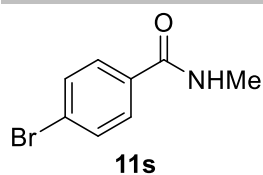4-Bromo-*N*-methylbenzamide (**11s**)General procedures **A**; Yield of 97%. $^1\text{H}$  NMR (500 MHz,  $\text{CDCl}_3$ )  $\delta$  7.62 (d,  $J$  = 8.5 Hz, 2H), 7.55 (d,  $J$  = 8.4 Hz, 2H), 6.18 (brs, 1H), 3.00 (d,  $J$  = 4.9 Hz, 3H). $^{13}\text{C}$  NMR (126 MHz,  $\text{CDCl}_3$ )  $\delta$  167.39, 133.69, 131.95, 128.61, 126.17, 27.02.HRMS (EI+(eIFI)) calcd. for  $\text{C}_8\text{H}_7\text{BrNO}$   $[\text{M}-\text{H}]^+$  211.9711, found 211.9712.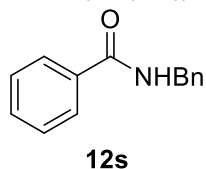*N*-Benzylbenzamide (**12s**)<sup>[13]</sup>General procedures **B**; Yield of 90%. $^1\text{H}$  NMR (400 MHz,  $\text{CDCl}_3$ )  $\delta$  7.81 – 7.78 (m, 2H), 7.53 – 7.48 (m, 1H), 7.45 – 7.41 (m, 2H), 7.37 – 7.27 (m, 5H), 6.40 (brs, 1H), 4.66 (d,  $J$  = 5.6 Hz, 2H).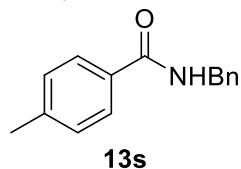*N*-Benzyl-4-methylbenzamide (**13s**)<sup>[14]</sup>General procedures **B**; Yield of 90%. $^1\text{H}$  NMR (300 MHz,  $\text{CDCl}_3$ )  $\delta$  7.69 (d,  $J$  = 8.2 Hz, 2H), 7.38 – 7.27 (m, 5H), 7.23 (d,  $J$  = 8.0 Hz, 2H), 6.36 (brs, 1H), 4.65 (d,  $J$  = 5.6 Hz, 2H), 2.39 (s, 3H).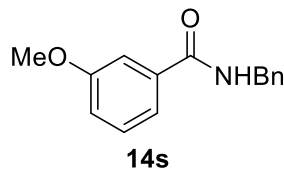*N*-Benzyl-3-methoxybenzamide (**14s**)<sup>[14]</sup>General procedures **B**; Yield of 90%. $^1\text{H}$  NMR (400 MHz,  $\text{CD}_2\text{Cl}_2$ )  $\delta$  7.36 – 7.27 (m, 8H), 7.06 – 7.03 (m, 1H), 6.59 (brs, 1H), 4.60 (d,  $J$  = 5.8 Hz, 2H), 3.83 (s, 3H).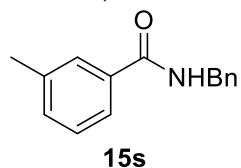*N*-Benzyl-3-methylbenzamide (**15s**)<sup>[15]</sup>General procedures **B**; Yield of 91%. $^1\text{H}$  NMR (400 MHz,  $\text{CDCl}_3$ )  $\delta$  7.62 (s, 1H), 7.58 – 7.55 (m, 1H), 7.37 – 7.29 (m, 7H), 6.38 (brs, 1H), 4.65 (d,  $J$  = 5.4 Hz, 2H), 2.39 (s, 3H).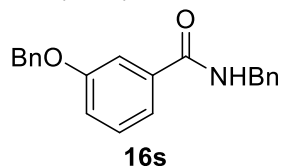*N*-Benzyl-3-benzyloxybenzamide (**16s**)<sup>[15]</sup>General procedures **B**; Yield of 95%. $^1\text{H}$  NMR (400 MHz,  $\text{CDCl}_3$ )  $\delta$  7.48 – 7.29 (m, 13H), 7.12 – 7.09 (m, 1H), 6.37 (brs, 1H), 5.10 (s, 2H), 4.64 (d,  $J$  = 5.2 Hz, 2H).

## SUPPORTING INFORMATION

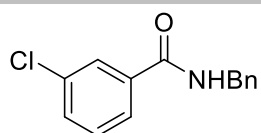**17s**

*N*-Benzyl-3-chlorobenzamide (**17s**)<sup>[16]</sup>

General procedures **B**; Yield of 95%.

<sup>1</sup>H NMR (400 MHz, CDCl<sub>3</sub>) δ 7.71 – 7.69 (m, 1H), 7.45 – 7.28 (m, 8H), 6.48 (brs, 1H), 4.94 – 4.59 (m, 2H).

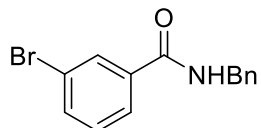**18s**

*N*-Benzyl-3-benzyloxybenzamide (**18s**)<sup>[17]</sup>

General procedures **B**; Yield of 89%.

<sup>1</sup>H NMR (400 MHz, CDCl<sub>3</sub>) δ 7.93 (d, *J* = 1.8 Hz, 1H), 7.70 (d, *J* = 7.8 Hz, 1H), 7.62 (d, *J* = 8.0 Hz, 1H), 7.40 – 7.27 (m, 6H), 6.46 (brs, 1H), 4.72 – 4.57 (m, 2H).

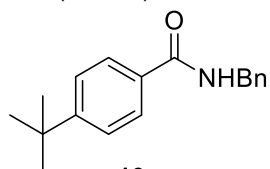**19s**

*N*-Benzyl-4-(tert-butyl)benzamide (**19s**)<sup>[15]</sup>

General procedures **B**; Yield of 89%.

<sup>1</sup>H NMR (400 MHz, CDCl<sub>3</sub>) δ 7.74 – 7.72 (m, 2H), 7.46 – 7.44 (m, 2H), 7.36 – 7.27 (m, 5H), 6.35 (brs, 1H), 4.66 (d, *J* = 5.7 Hz, 2H), 1.33 (s, 9H).

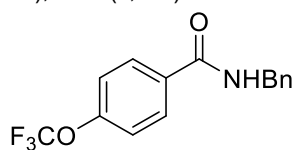**20s**

*N*-Benzyl-4-(trifluoromethoxy)benzamide (**20s**)<sup>[18]</sup>

General procedures **B**; Yield of 95%.

<sup>1</sup>H NMR (300 MHz, CDCl<sub>3</sub>) δ 7.86 – 7.81 (m, 2H), 7.38 – 7.27 (m, 5H), 7.27 – 7.24 (m, 2H), 6.39 (brs, 1H), 4.64 (d, *J* = 5.6 Hz, 2H).

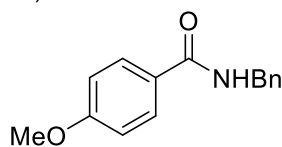**21s**

*N*-Benzyl-4-methoxybenzamide (**21s**)<sup>[16]</sup>

General procedures **B**; Yield of 95%.

<sup>1</sup>H NMR (400 MHz, CDCl<sub>3</sub>) δ 7.77 – 7.74 (m, 2H), 7.36 – 7.27 (m, 5H), 6.93 – 6.90 (m, 2H), 6.32 (brs, 1H), 4.64 (d, *J* = 5.6 Hz, 2H), 3.84 (s, 3H).

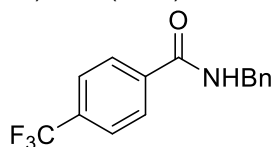**22s**

*N*-Benzyl-4-(trifluoromethyl)benzamide (**22s**)<sup>[16]</sup>

General procedures **B**; Yield of 87%.

<sup>1</sup>H NMR (400 MHz, CDCl<sub>3</sub>) δ 7.89 (d, *J* = 8.1 Hz, 2H), 7.68 (d, *J* = 8.2 Hz, 2H), 7.38 – 7.27 (m, 5H), 6.56 (brs, 1H), 4.64 (d, *J* = 5.6 Hz, 2H).

## SUPPORTING INFORMATION

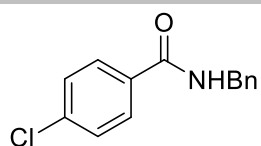**23s**

*N*-Benzyl-4-chlorobenzamide (**23s**)<sup>[14]</sup>

General procedures **B**; Yield of 89%.

<sup>1</sup>H NMR (400 MHz, CDCl<sub>3</sub>) δ 7.74 – 7.72 (m, 2H), 7.40 – 7.38 (m, 2H), 7.35 – 7.27 (m, 5H), 6.46 (brs, 1H), 4.63 (d, *J* = 5.5 Hz, 2H).

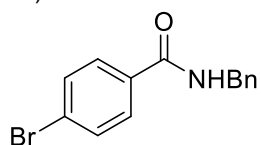**24s**

*N*-benzyl-4-bromobenzamide (**24s**)<sup>[18]</sup>

General procedures **B**; Yield of 89%.

<sup>1</sup>H NMR (400 MHz, CD<sub>2</sub>Cl<sub>2</sub>) δ 7.68 – 7.65 (m, 2H), 7.60 – 7.57 (m, 2H), 7.36 – 7.27 (m, 5H), 6.49 (brs, 1H), 4.60 (d, *J* = 5.9 Hz, 2H).

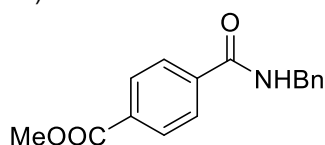**25s**

Methyl 4-(benzylcarbamoyl)benzoate (**25s**)<sup>[16]</sup>

General procedures **B**; Yield of 87%.

<sup>1</sup>H NMR (500 MHz, CDCl<sub>3</sub>) δ 8.09 (d, *J* = 8.4 Hz, 2H), 7.86 – 7.83 (m, 2H), 7.38 – 7.27 (m, 5H), 6.42 (brs, 1H), 4.66 (s, 2H), 3.94 (s, 3H).

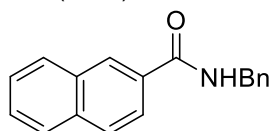**26s**

*N*-Benzyl-2-naphthamide (**26s**)<sup>[15]</sup>

General procedures **B**; Yield of 89%.

<sup>1</sup>H NMR (400 MHz, CDCl<sub>3</sub>) δ 8.31 (d, *J* = 1.6 Hz, 1H), 7.97 – 7.81 (m, 4H), 7.59 – 7.51 (m, 2H), 7.45 – 7.29 (m, 5H), 6.57 (brs, 1H), 4.72 (d, *J* = 5.6 Hz, 2H).

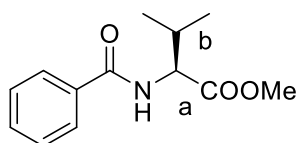**27s**

Methyl benzoyl-*L*-valinate (**27s**)<sup>[19]</sup>

General procedures **B**; Yield of 95%.

<sup>1</sup>H NMR (400 MHz, CDCl<sub>3</sub>) δ 7.82 – 7.80 (m, 2H), 7.54 7.43 (m, 3H), 6.64 (d, *J* = 8.6 Hz, 1H, amide-NH), 4.79 (dd, *J* = 8.6, 4.9 Hz, 1H, Ha), 3.77 (s, 3H, OMe), 2.33 – 2.23 (m, 1H, Hb), 1.21 – 0.94 (m, 6H, isopropyl-Me).

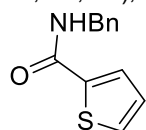**28s**

*N*-Benzylthiophene-2-carboxamide (**28s**)<sup>[14]</sup>

General procedures **B**; Yield of 88%.

<sup>1</sup>H NMR (500 MHz, CDCl<sub>3</sub>) δ 7.50 (d, *J* = 3.8 Hz, 1H), 7.49 (d, *J* = 5.0 Hz, 1H), 7.37 – 7.29 (m, 5H), 7.08 (dd, *J* = 5.0, 3.8 Hz, 1H), 6.21 (brs, 1H), 4.64 – 4.62 (m, 2H).

## SUPPORTING INFORMATION

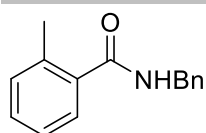**29s**

*N*-Benzyl-2-methylbenzamide (**29s**)<sup>[16]</sup>

General procedures **B**; Yield of 89%.

<sup>1</sup>H NMR (400 MHz, CDCl<sub>3</sub>) δ 7.39 – 7.29 (m, 7H), 7.23 – 7.17 (m, 2H), 6.01 (brs, 1H, amide-NH), 4.65 – 4.63 (m, 2H, Bn-CH<sub>2</sub>), 2.48 (s, 3H, aryl-Me).

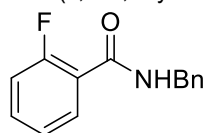**30s**

*N*-Benzyl-2-fluorobenzamide (**30s**)<sup>[20]</sup>

General procedures **B**; Yield of 85%.

<sup>1</sup>H NMR (400 MHz, CDCl<sub>3</sub>) δ 8.15 (td, *J* = 7.9, 1.9 Hz, 1H), 7.50 – 7.45 (m, 1H), 7.38 – 7.27 (m, 6H), 7.16 – 7.08 (m, 1H), 7.04 (brs, 1H, amide-NH), 4.69 (dd, *J* = 5.6, 1.5 Hz, 2H, Bn-CH<sub>2</sub>).

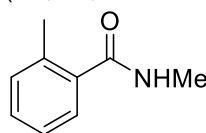**31s**

*N*-Methyl-2-methylbenzamide (**31s**)<sup>[21]</sup>

General procedures **B**; Yield of 89%.

<sup>1</sup>H NMR (400 MHz, CDCl<sub>3</sub>) δ 7.36 – 7.13 (m, 2H), 7.13 – 7.00 (m, 2H), 5.85 (s, 1H), 2.84 (d, *J* = 4.9 Hz, 3H), 2.30 (s, 3H).

<sup>13</sup>C NMR (126 MHz, CDCl<sub>3</sub>) δ 170.94, 136.62, 136.08, 131.03, 129.84, 126.76, 125.75, 77.42, 77.16, 76.91, 26.67, 19.83.

HRMS (EI+(eiFi)) calcd. for C<sub>9</sub>H<sub>11</sub>NO [M]<sup>+</sup> 149.0841, found 149.0905

### Preparation of the reference borylated compounds

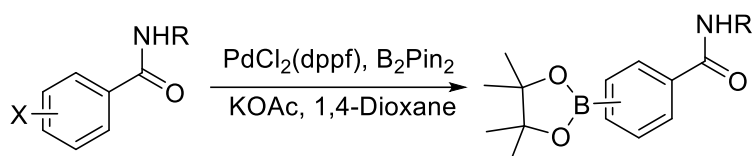

General procedures: A mixture of halogenate aromatic amides (1 eq.), PdCl<sub>2</sub>(dppf) (0.03 eq.), KOAc (3 eq.) and bis(pinacolato)diboron (1.5 eq.) in 1,4-dioxane was heated at 80 °C overnight. After cooling to room temperature, the reaction mixture was diluted with water and extracted with ethyl acetate. The combined organic layers were washed with water and brine, dried over Na<sub>2</sub>SO<sub>4</sub>, filtered off and concentrated under reduced pressure. The product was purified by chromatography using deactivated silica gel and ethyl acetate and petroleum ether or hexane as the eluent.<sup>22-26</sup>

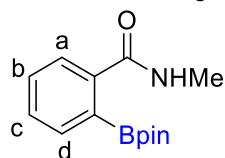**1so**

*N*-methyl-2-(4,4,5,5-tetramethyl-1,3,2-dioxaborolan-2-yl)benzamide (**1so**)

Gray solid; Isolated Yield of 30%.

<sup>1</sup>H NMR (500 MHz, CDCl<sub>3</sub>) δ 9.78 (s, 1H, amide-NH), 7.80 (d, *J* = 7.6 Hz, 1H, Ha), 7.60 (d, *J* = 7.1 Hz, 1H, Hd), 7.40 (t, *J* = 7.3 Hz, 1H, Hc), 7.14 (t, *J* = 7.6 Hz, 1H, Hb), 2.46 (d, *J* = 4.5 Hz, 3H, Me), 1.35 (s, 12H, pin-Me).

<sup>13</sup>C NMR (126 MHz, CDCl<sub>3</sub>) δ 172.41, 133.29, 132.76, 130.36, 127.52, 123.61, 81.19, 27.26, 25.33.

HRMS (FD+(eiFi)) calcd. for C<sub>14</sub>H<sub>20</sub>BNO<sub>3</sub> [M]<sup>+</sup> 261.1539, found 261.1511.

## SUPPORTING INFORMATION

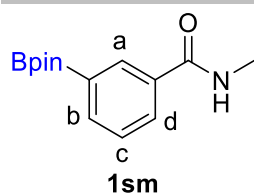

*N*-methyl-3-(4,4,5,5-tetramethyl-1,3,2-dioxaborolan-2-yl)benzamide (**1sm**)

Gray solid; Isolated Yield of 70%.

$^1\text{H}$  NMR (500 MHz, THF- $d_8$ )  $\delta$  8.15 (s, 1H, Ha), 7.95 (dt,  $J$  = 7.7, 1.6 Hz, 1H, Hd), 7.82 – 7.81 (m, 1H, Hb), 7.65 – 7.62 (m, 1H, amide-NH), 7.37 (t,  $J$  = 7.5 Hz, 1H, Hc), 2.87 (d,  $J$  = 4.5 Hz, 3H, Me), 1.33 (s, 12H, pin-Me).

$^{13}\text{C}$  NMR (126 MHz, THF- $d_8$ )  $\delta$  167.19, 137.55, 135.47, 133.40, 131.04, 128.02, 84.42, 26.41, 25.62.

HRMS (FD+(eiFi)) calcd. for  $\text{C}_{14}\text{H}_{20}\text{BNO}_3$   $[\text{M}]^+$  261.1536, found 261.1511.

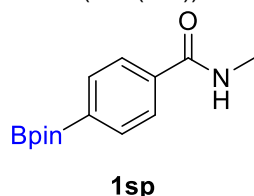

*N*-methyl-4-(4,4,5,5-tetramethyl-1,3,2-dioxaborolan-2-yl)benzamide (**1sp**)

Gray solid; Isolated Yield of 80%.

$^1\text{H}$  NMR (500 MHz, THF- $d_8$ )  $\delta$  7.80 – 7.76 (m, 4H), 7.58 (brs, 1H, amide-NH), 2.87 (d,  $J$  = 4.7 Hz, 3H, Me), 1.32 (s, 12H, pin-Me).

$^{13}\text{C}$  NMR (126 MHz, THF- $d_8$ )  $\delta$  167.01, 138.34, 135.07, 126.72, 84.43, 25.62.

HRMS (FD+(eiFi)) calcd. for  $\text{C}_{14}\text{H}_{20}\text{BNO}_3$   $[\text{M}]^+$  261.1536, found 261.1525.

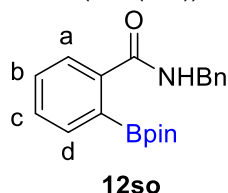

*N*-benzyl-2-(4,4,5,5-tetramethyl-1,3,2-dioxaborolan-2-yl)benzamide (**12so**)

Gray solid; Isolated Yield of 25%.

$^1\text{H}$  NMR (400 MHz,  $\text{CD}_2\text{Cl}_2$ )  $\delta$  9.72 (brs, 1H, amide-NH), 8.05 (d,  $J$  = 7.9 Hz, 1H, Ha), 7.65 (d,  $J$  = 7.3 Hz, 1H, Hb), 7.54 (t,  $J$  = 7.3 Hz, 1H, Hc), 7.39 – 7.26 (m, 6H, Hd and Bn-aryl-H), 4.03 (d,  $J$  = 6.0 Hz, 2H, Bn- $\text{CH}_2$ ), 1.27 (s, 12H, pin-Me).

$^{13}\text{C}$  NMR (126 MHz,  $\text{CD}_2\text{Cl}_2$ )  $\delta$  171.93, 137.53, 134.59, 132.93, 131.11, 128.89, 128.42, 128.17, 127.99, 124.77, 81.96, 44.86, 25.13.

HRMS (FD+(eiFi)) calcd. for  $\text{C}_{20}\text{H}_{24}\text{BNO}_3$   $[\text{M}]^+$  337.1853, found 337.1850.

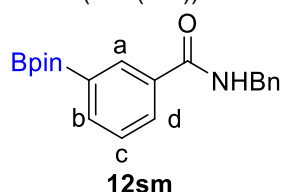

*N*-benzyl-3-(4,4,5,5-tetramethyl-1,3,2-dioxaborolan-2-yl)benzamide (**12sm**)

Gray solid; Isolated Yield of 65%.

$^1\text{H}$  NMR (400 MHz,  $\text{CDCl}_3$ )  $\delta$  8.08 (t,  $J$  = 1.4 Hz, 1H, Ha), 8.02 (dt,  $J$  = 7.7, 1.6 Hz, 1H, Hd), 7.93 (dt,  $J$  = 7.3, 1.2 Hz, 1H, Hb), 7.47 (t,  $J$  = 7.6 Hz, 1H, Hc), 7.40 – 7.28 (m, 5H, Bn-aryl-H), 6.49 (brs, 1H, amide-NH), 4.66 (d,  $J$  = 5.7 Hz, 2H, Bn- $\text{CH}_2$ ), 1.34 (s, 12H, pin-Me).

$^{13}\text{C}$  NMR (75 MHz,  $\text{CDCl}_3$ )  $\delta$  167.35, 138.36, 138.07, 133.80, 132.22, 130.83, 128.92, 128.38, 128.19, 127.76, 84.30, 44.30, 25.02.

HRMS (FD+(eiFi)) calcd. for  $\text{C}_{20}\text{H}_{24}\text{BNO}_3$   $[\text{M}]^+$  337.1853, found 337.1851.

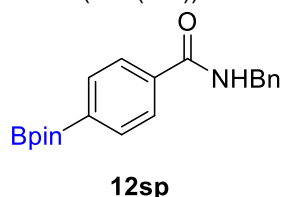

*N*-benzyl-4-(4,4,5,5-tetramethyl-1,3,2-dioxaborolan-2-yl)benzamide (**12sp**)

Gray solid; Isolated Yield of 85%.



## SUPPORTING INFORMATION

$^1\text{H}$  NMR (300 MHz,  $\text{CDCl}_3$ )  $\delta$  7.88 – 7.85 (m, 2H), 7.77 (d,  $J$  = 8.2 Hz, 2H), 7.37 – 7.26 (m, 5H, Bn-aryl-H), 6.40 (brs, 1H, amide-NH), 4.66 (d,  $J$  = 5.7 Hz, 2H, Bn- $\text{CH}_2$ ), 1.35 (s, 12H, pin-Me).

$^{13}\text{C}$  NMR (75 MHz,  $\text{CDCl}_3$ )  $\delta$  167.39, 138.24, 136.69, 135.11, 128.94, 128.11, 127.79, 126.21, 84.28, 44.32, 25.02.

HRMS (FD+(eiFi)) calcd. for  $\text{C}_{20}\text{H}_{24}\text{BNO}_3$   $[\text{M}]^+$  337.1853, found 337.1847.

## Control experiments with substrates that can form 2 or 3 hydrogen bonds

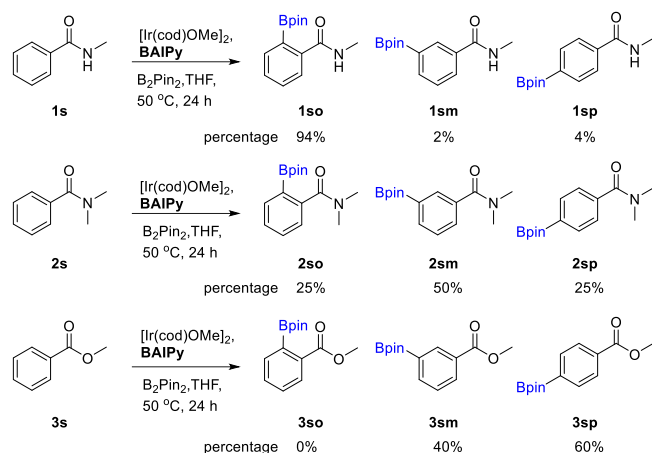

Scheme S2. Control experiments with substrates that can form 2 (**2s**, **3s**) or 3 (**1s**) hydrogen bonds.

Iridium catalyzed *ortho*-selective C-H borylation

General procedures: A mixture of  $[\text{Ir}(\text{OMe})(\text{cod})]_2$  (5.967 mg, 9.0  $\mu\text{mol}$ , 1.5 mol%), ligand **BAIPy** (6.174 mg, 19.8  $\mu\text{mol}$ , 3.3 mol%) or **BPY** (2.808 mg, 19.8  $\mu\text{mol}$ , 3.3 mol%) in THF (3.0 ml) was added into pre-dried vial with bis(pinacolato)diboron (228.0 mg, 0.898 mmol, 1.50 equiv.) and aromatic amides (0.598 mmol, 1.0 equiv.) in Glove-box. The mixture was then stirred at 50–60  $^\circ\text{C}$  for 24–96 hours under nitrogen atmosphere. The conversion and selectivity was analysed by GC (Rtx-1 column, method: Initial temperature = 50  $^\circ\text{C}$  for 2 min, then 10 $^\circ\text{C}/\text{min}$  to 300 $^\circ\text{C}$  for 15 min) using 1,3,5-trimethoxybenzene as the internal standard and NMR technique of the purified reaction mixture. The product was isolated by chromatography using deactivated silica gel and ethyl acetate and petroleum ether or hexane (10:0.5 to 2:1) as the eluent (for details see below). Isolated yield is lower than the calculated yield due to decomposition of the borylated compound during purification using silica (the off up to 25%). The decomposed boronic acid were observed by NMR. Attempt to convert the borylated products to  $\text{BF}_3\text{K}$  salts without success for easy separation of the product via crystallization.

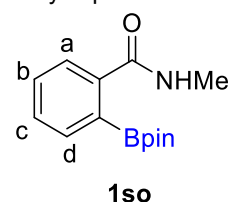

*N*-methyl-2-(4,4,5,5-tetramethyl-1,3,2-dioxaborolan-2-yl)benzamide (**1so**)

Isolated by chromatography using deactivated silica gel and ethyl acetate and petroleum ether (10:1 to 2:1) as the eluent.

**BAIPy**-Ir catalyst; Isolated yield of 63%.

**BPY**-Ir catalyst; Isolated yield of 0%.

Rtx-1 column, method: Initial temperature = 50  $^\circ\text{C}$  for 2 min, then 10 $^\circ\text{C}/\text{min}$  to 300 $^\circ\text{C}$  for 15 min. Retention time:  $t$  (Sub) = 12.683 min,  $t$  (*ortho*) = 19.275 min,  $t$  (*meta*) = 20.535 min and  $t$  (*para*) = 20.272 min.

$^1\text{H}$  NMR (500 MHz,  $\text{CDCl}_3$ )  $\delta$  9.78 (s, 1H, amide-NH), 7.80 (d,  $J$  = 7.6 Hz, 1H, Ha), 7.60 (d,  $J$  = 7.1 Hz, 1H, Hd), 7.40 (t,  $J$  = 7.3 Hz, 1H, Hc), 7.14 (t,  $J$  = 7.6 Hz, 1H, Hb), 2.46 (d,  $J$  = 4.5 Hz, 3H, Me), 1.35 (s, 12H, pin-Me).

$^{13}\text{C}$  NMR (126 MHz,  $\text{CDCl}_3$ )  $\delta$  172.41, 133.29, 132.76, 130.36, 127.52, 123.61, 81.19, 27.26, 25.33.

HRMS (FD+(eiFi)) calcd. for  $\text{C}_{14}\text{H}_{20}\text{BNO}_3$   $[\text{M}]^+$  261.1539, found 261.1511.

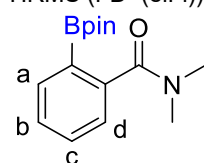

*N,N*-dimethyl-2-(4,4,5,5-tetramethyl-1,3,2-dioxaborolan-2-yl)benzamide (**2so**)

## SUPPORTING INFORMATION

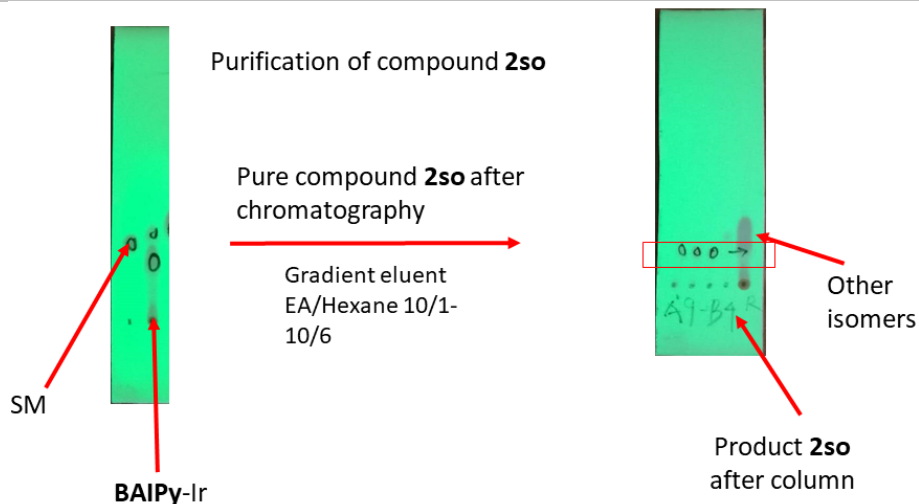

Isolated by chromatography using deactivated silica gel and ethyl acetate and petroleum ether (5:1 to 1:1) as the eluent. **BAIPy-Ir** catalyst; Isolated yield of 25%.

Rtx-1 column, method: Initial temperature = 50 °C for 2 min, then 10°C/min to 300°C for 15 min. Retention time: t (Sub) = 12.642 min, t (*ortho*) = 18.723 min, t (*meta*) = 24.397 min and t (*para*) = 24.815 min.

<sup>1</sup>H NMR (500 MHz, CD<sub>2</sub>Cl<sub>2</sub>) δ 7.76 – 7.74 (m, 1H, Hd), 7.46 (td, *J* = 7.5, 1.4 Hz, 1H, Hb), 7.37 (td, *J* = 7.5, 1.2 Hz, 1H, Hc), 7.24 (d, *J* = 7.6 Hz, 1H, Ha), 2.99 – 2.84 (m, 6H, amide-Me), 1.30 (s, 12H, pin-Me).

<sup>13</sup>C NMR (126 MHz, CD<sub>2</sub>Cl<sub>2</sub>) δ 172.28, 143.68, 135.28, 131.26, 128.18, 125.88, 84.10, 25.09.

HRMS (FD+(eiFi)) calcd. for C<sub>15</sub>H<sub>22</sub>BNO<sub>3</sub> [M]<sup>+</sup> 275.1696, found 275.1693.

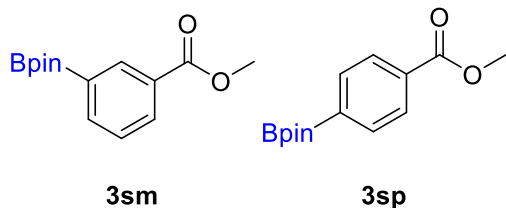

Methyl-3-(4,4,5,5-tetramethyl-1,3,2-dioxaborolan-2-yl)benzoate (**3sm**) and Methyl-4-(4,4,5,5-tetramethyl-1,3,2-dioxaborolan-2-yl)benzoate (**3sp**)

<sup>1</sup>H NMR in line with literature.<sup>15,16</sup>

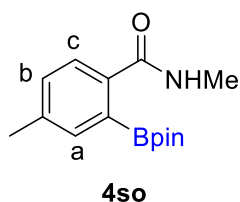

*N*,4-dimethyl-2-(4,4,5,5-tetramethyl-1,3,2-dioxaborolan-2-yl)benzamide (**4so**)

Isolated by chromatography using deactivated silica gel and ethyl acetate and petroleum ether (10:1 to 2:1) as the eluent.

## SUPPORTING INFORMATION

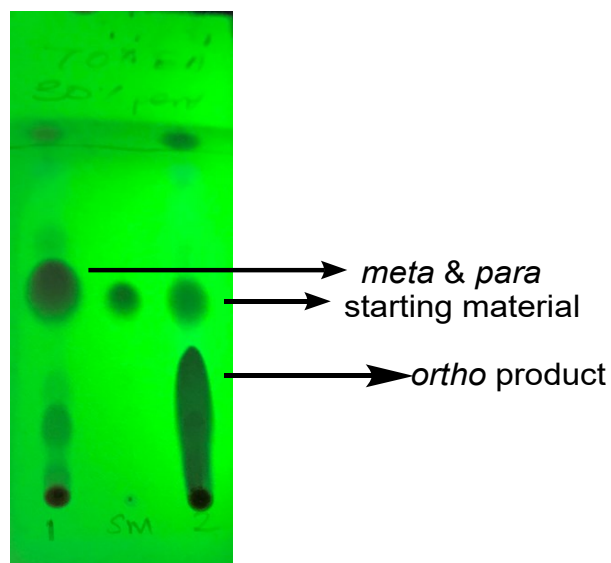

EtOAc:Pentane (70:30)

purification of ortho product by  
Column chromatography

Start 10%, 20%, 30%, 40%, 50%, 60% in 100 mL

At 30% EA - get starting material

At 60% EA - get product

**BAIPy**-Ir catalyst; Isolated yield of 61%.

**BPy**-Ir catalyst; Isolated yield of -%.

Rtx-1 column, method: Initial temperature = 50 °C for 2 min, then 10°C/min to 300°C for 15 min. Retention time: t (Sub) = 14.857 min, t (*ortho*) = 20.905 min, t (*meta*) = 20.308 min.

<sup>1</sup>H NMR (500 MHz, CDCl<sub>3</sub>) δ 8.77 (s, 1H, amide-NH), 7.59 (d, *J* = 7.9 Hz, 1H, Hc), 7.39 (s, 1H, Ha), 7.00 (d, *J* = 7.8 Hz, 1H, Hb), 2.65 – 2.62 (m, 3H, Me), 1.36 (s, 12H, pin-Me).

<sup>13</sup>C NMR (126 MHz, CDCl<sub>3</sub>) δ 172.24, 143.06, 131.11, 128.39, 123.58, 81.23, 27.27, 25.35, 21.90.

HRMS (FD+(eiFi)) calcd. for C<sub>15</sub>H<sub>22</sub>BNO<sub>3</sub> [M]<sup>+</sup> 275.1696, found 275.1693.

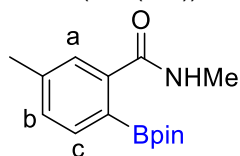

**5so**

*N*,5-dimethyl-2-(4,4,5,5-tetramethyl-1,3,2-dioxaborolan-2-yl)benzamide (**5so**)

Isolated by chromatography using deactivated silica gel and ethyl acetate and petroleum ether (10:1 to 1:1) as the eluent.

## SUPPORTING INFORMATION

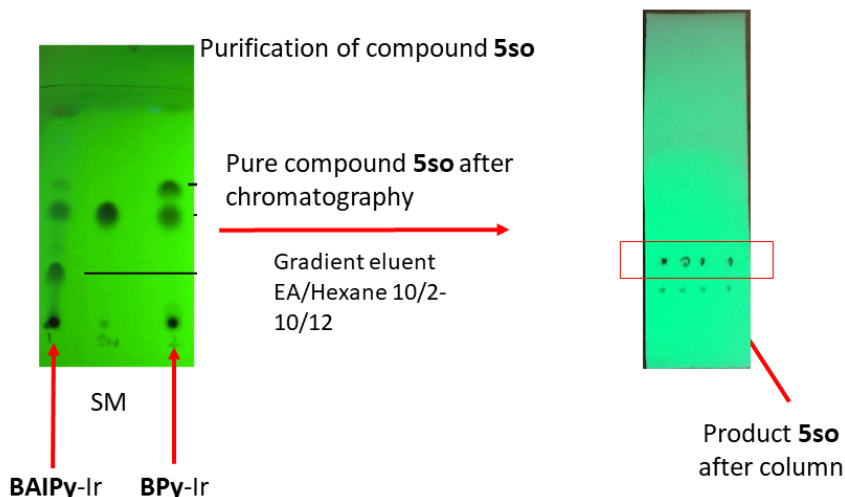

**BAIPy-Ir** catalyst; Isolated yield of 45%.

**BPy-Ir** catalyst; Isolated yield of 0%.

Rtx-1 column, method: Initial temperature = 50 °C for 2 min, then 10°C/min to 300°C for 15 min. Retention time:  $t(\text{Sub}) = 14.745$  min,  $t(\text{ortho}) = 20.965$  min,  $t(\text{meta}) = 21.780$  min.

$^1\text{H}$  NMR (500 MHz,  $\text{CD}_2\text{Cl}_2$ )  $\delta$  7.73 (brs, 1H, amide-NH), 7.50 (s, 1H, Ha), 7.46 (d,  $J = 7.4$  Hz, 1H, Hb), 7.27 (d,  $J = 7.5$  Hz, 1H, Hc), 2.74 (d,  $J = 4.8$  Hz, 3H, amide-Me), 2.36 (s, 3H, aryl-Me), 1.33 (s, 12H, pin-Me).

$^{13}\text{C}$  NMR (126 MHz,  $\text{CD}_2\text{Cl}_2$ )  $\delta$  171.21, 138.98, 132.55, 132.12, 125.33, 82.73, 27.11, 25.21, 21.43.

The borylated product was also transformed into hydroxyl group functionalized product for confirmation as shown below.

HRMS (FD+(eiFi)) calcd. for  $\text{C}_{15}\text{H}_{23}\text{BNO}_3$   $[\text{M}+\text{H}]^+$  276.1771, found 276.1495.

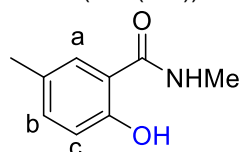

**5so'**

2-Hydroxy-*N*,5-dimethyl-benzamide (**5so'**)

$^1\text{H}$  NMR in line with commercial compound.

$^1\text{H}$  NMR (500 MHz,  $\text{CDCl}_3$ )  $\delta$  12.09 (s, 1H, OH), 7.20 (d,  $J = 8.4$  Hz, 1H, Hb), 7.12 (s, 1H, Ha), 6.89 (d,  $J = 8.6$  Hz, 1H, Hc), 6.31 (brs, 1H, amide-NH), 3.01 (d,  $J = 4.8$  Hz, 3H, Me), 2.28 (s, 3H, aryl-Me).

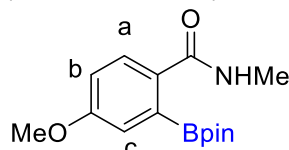

**6so**

4-Methoxy-*N*-methyl-2-(4,4,5,5-tetramethyl-1,3,2-dioxaborolan-2-yl)benzamide (**6so**)

Isolated by chromatography using deactivated silica gel and ethyl acetate and petroleum ether (10:1 to 1:1) as the eluent.

**BAIPy-Ir** catalyst; Isolated yield of 59%.

**BPy-Ir** catalyst; Isolated yield of 64%.

Rtx-1 column, method: Initial temperature = 50 °C for 2 min, then 10°C/min to 300°C for 15 min. Retention time:  $t(\text{Sub}) = 16.605$  min,  $t(\text{ortho}) = 22.218$  min,  $t(\text{meta}) = 21.535$  min.

$^1\text{H}$  NMR (500 MHz,  $\text{CDCl}_3$ )  $\delta$  9.80 (brs, 1H, amide-NH), 7.70 (d,  $J = 8.5$  Hz, 1H, Ha), 7.05 (d,  $J = 2.4$  Hz, 1H, Hc), 6.58 (dd,  $J = 8.5, 2.3$  Hz, 1H, Hb), 3.83 (s, 3H, OMe), 2.50 – 2.49 (m, 3H, Me), 1.33 (s, 12H, pin-Me).

$^{13}\text{C}$  NMR (126 MHz,  $\text{CDCl}_3$ )  $\delta$  172.20, 163.83, 125.44, 125.31, 114.09, 114.02, 80.97, 55.47, 27.42, 25.36.

HRMS (FD+(eiFi)) calcd. for  $\text{C}_{15}\text{H}_{22}\text{BNO}_4$   $[\text{M}]^+$  291.1645, found 291.1637.

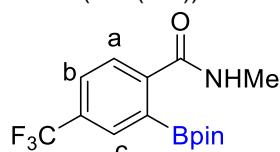

**7so**

*N*-Methyl-2-(4,4,5,5-tetramethyl-1,3,2-dioxaborolan-2-yl)-4-(trifluoromethyl)benzamide (**7so**)

Isolated by chromatography using deactivated silica gel and ethyl acetate and petroleum ether (10:1 to 1:1) as the eluent.

## SUPPORTING INFORMATION

**BAIPy-Ir** catalyst; Isolated yield of 77%.

**BPy-Ir** catalyst; Isolated yield of -%.

Rtx-1 column, method: Initial temperature = 50 °C for 2 min, then 10°C/min to 300°C for 15 min. Retention time: t (Sub) = 13.195 min, t (*ortho*)= 19.230 min, t (*meta*)= 17.618 min.

<sup>1</sup>H NMR (500 MHz, THF-*d*<sub>6</sub>) δ 9.19 – 9.18 (m, 1H, amide-NH), 7.80 (d, *J* = 8.1 Hz, 1H, Ha), 7.73 (d, *J* = 1.7 Hz, 1H, Hc), 7.52 (dd, *J* = 8.1, 1.9 Hz, 1H, Hb), 2.86 (d, *J* = 4.6 Hz, 3H, Me), 1.32 (s, 12H, pin-Me).

<sup>13</sup>C NMR (126 MHz, THF-*d*<sub>6</sub>) δ 170.15, 139.22, 133.34 (m, two bonds C-F coupling), 127.92 (m, three bonds C-F coupling), 125.20 (m, three bonds C-F coupling), 125.13 (m, one C-F coupling), 82.18, 27.32, 25.43.

HRMS (FD+(eiFi)) calcd. for C<sub>15</sub>H<sub>20</sub>BF<sub>3</sub>NO<sub>3</sub> [M-H]<sup>+</sup> 330.1413, found 330.1460.

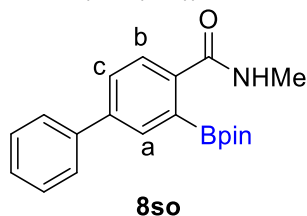

*N*-methyl-3-(4,4,5,5-tetramethyl-1,3,2-dioxaborolan-2-yl)-[1,1'-biphenyl]-4-carboxamide (**8so**)

Purification of compound **8so**

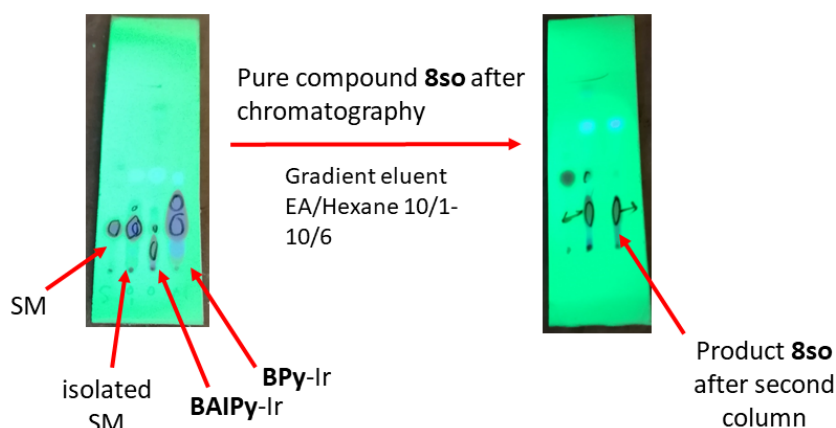

Isolated by chromatography using deactivated silica gel and ethyl acetate and petroleum ether (10:1 to 2:1) as the eluent.

**BAIPy-Ir** catalyst; Isolated yield of 56%.

**BPy-Ir** catalyst; Isolated yield of 0%.

Rtx-1 column, method: Initial temperature = 50 °C for 2 min, then 10°C/min to 300°C for 15 min. Retention time: t (Sub) = 21.670 min, t (*ortho*)= 26.152 min, t (*meta*)= 27.382 min.

<sup>1</sup>H NMR (500 MHz, CDCl<sub>3</sub>) δ 9.36 (s, 1H, amide-NH), 7.81 (s, 1H, Ha), 7.77 (d, *J* = 7.9 Hz, 1H, Hb), 7.47 (d, *J* = 6.5 Hz, 2H), 7.37 (d, *J* = 6.1 Hz, 3H), 7.26 (d, *J* = 2.5 Hz, 1H), 2.69 (s, 3H, Me), 1.38 (s, 12H, pin-Me).

<sup>13</sup>C NMR (126 MHz, CDCl<sub>3</sub>) δ 171.91, 145.14, 140.66, 132.60, 129.10, 128.80, 127.80, 127.36, 126.77, 123.89, 81.44, 27.33, 25.25.

HRMS (FD+(eiFi)) calcd. for C<sub>20</sub>H<sub>24</sub>BNO<sub>3</sub> [M]<sup>+</sup> 337.1853, found 337.1846.

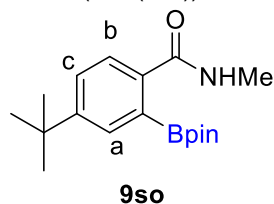

4-(Tert-butyl)-*N*-methyl-2-(4,4,5,5-tetramethyl-1,3,2-dioxaborolan-2-yl)benzamide (**9so**)

Isolated by chromatography using deactivated silica gel and ethyl acetate and petroleum ether (10:1 to 1:1) as the eluent.

**BAIPy-Ir** catalyst; Isolated yield of 41%.

**BPy-Ir** catalyst; Isolated yield of -%.

Rtx-1 column, method: Initial temperature = 50 °C for 2 min, then 10°C/min to 300°C for 15 min. Retention time: t (Sub) = 17.562 min, t (*ortho*)= 22.218 min, t (*meta*)= 21.535 min.

<sup>1</sup>H NMR (500 MHz, CDCl<sub>3</sub>) δ 9.59 (s, 1H, amide-NH), 7.80 – 7.78 (m, 1H, Hb), 7.59 – 7.56 (m, 1H, Ha), 7.20 (dd, *J* = 8.2, 1.8 Hz, 1H, Hc), 2.43 – 2.42 (m, 3H, Me), 1.36 (s, 12H, pin-Me), 1.28 (s, 9H, tert-butyl).

<sup>13</sup>C NMR (126 MHz, CDCl<sub>3</sub>) δ 172.27, 155.94, 130.95, 126.86, 124.95, 123.42, 81.18, 35.25, 27.07, 25.38.

HRMS (FD+(eiFi)) calcd. for C<sub>18</sub>H<sub>28</sub>BNO<sub>3</sub> [M]<sup>+</sup> 317.2166, found 317.2157.

## SUPPORTING INFORMATION

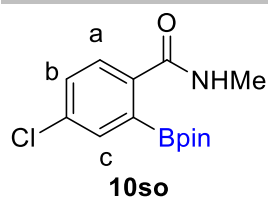

4-Chloro-*N*-methyl-2-(4,4,5,5-tetramethyl-1,3,2-dioxaborolan-2-yl)benzamide (**10so**)

Isolated by chromatography using deactivated silica gel and ethyl acetate and petroleum ether (10:1 to 1:1) as the eluent.

**BAIPy**-Ir catalyst; Isolated yield of 65%.

**BPY**-Ir catalyst; Isolated yield of 0%.

Rtx-1 column, method: Initial temperature = 50 °C for 2 min, then 10°C/min to 300°C for 15 min. Retention time:  $t(\text{Sub}) = 15.508$  min,  $t(\text{ortho}) = 21.555$  min,  $t(\text{meta}) = 24.407$  min.

$^1\text{H}$  NMR (500 MHz,  $\text{CDCl}_3$ )  $\delta$  9.66 (s, 1H, amide-NH), 7.69 (d,  $J = 8.2$  Hz, 1H, Ha), 7.54 (d,  $J = 2.0$  Hz, 1H, Hc), 7.15 (dd,  $J = 8.3, 2.0$  Hz, 1H, Hb), 2.62 (d,  $J = 4.5$  Hz, 3H, Me), 1.34 (s, 12H, pin-Me).

$^{13}\text{C}$  NMR (126 MHz,  $\text{CDCl}_3$ )  $\delta$  171.56, 140.05, 131.38, 130.66, 127.99, 124.76, 81.52, 27.59, 25.31.

HRMS (FD+(eiFi)) calcd. for  $\text{C}_{14}\text{H}_{19}\text{BClNO}_3$   $[\text{M}]^+$  295.1147, found 295.1140.

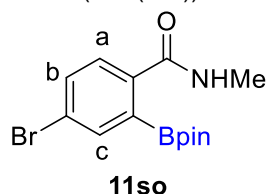

4-Bromo-*N*-methyl-2-(4,4,5,5-tetramethyl-1,3,2-dioxaborolan-2-yl)benzamide (**11so**)

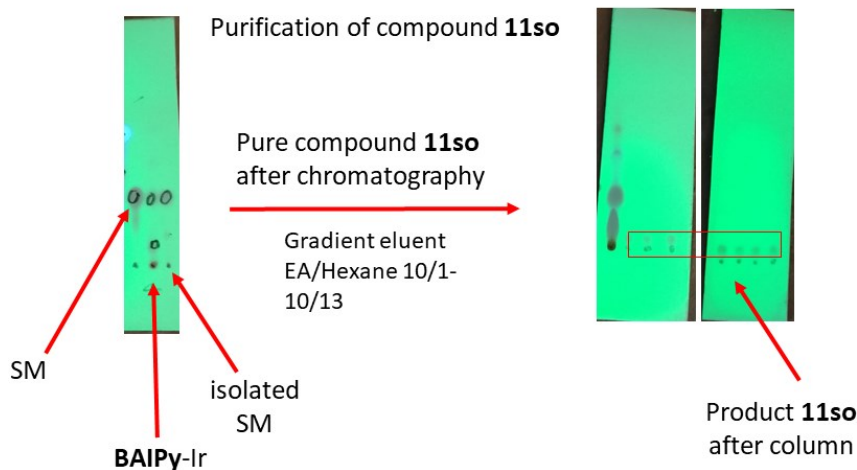

Isolated by chromatography using deactivated silica gel and ethyl acetate and petroleum ether (10:1 to 1:1) as the eluent.

**BAIPy**-Ir catalyst; Isolated yield of 70%.

**BPY**-Ir catalyst; Isolated yield of 0%.

Rtx-1 column, method: Initial temperature = 50 °C for 2 min, then 10°C/min to 300°C for 15 min. Retention time:  $t(\text{Sub}) = 16.623$  min.

$^1\text{H}$  NMR (500 MHz,  $\text{CD}_2\text{Cl}_2$ )  $\delta$  9.96 (s, 1H, amide-NH), 7.70 (d,  $J = 1.9$  Hz, 1H, Hc), 7.65 (d,  $J = 8.2$  Hz, 1H, Ha), 7.34 (dd,  $J = 8.2, 1.9$  Hz, 1H, Hb), 2.59 (d,  $J = 4.7$  Hz, 3H, Me), 1.32 (s, 12H, pin-Me).

$^{13}\text{C}$  NMR (126 MHz,  $\text{CD}_2\text{Cl}_2$ )  $\delta$  171.82, 133.61, 132.14, 131.11, 129.21, 125.52, 81.66, 27.66, 25.35.

HRMS (FD+(eiFi)) calcd. for  $\text{C}_{14}\text{H}_{19}\text{BBrNO}_3$   $[\text{M}]^+$  339.0644, found 339.1269.

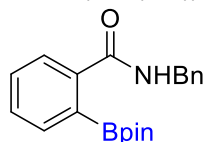

*N*-Benzyl-2-(4,4,5,5-tetramethyl-1,3,2-dioxaborolan-2-yl)benzamide (**12so**)

## SUPPORTING INFORMATION

General Catalysis setup  
4 reactions in one oil bath

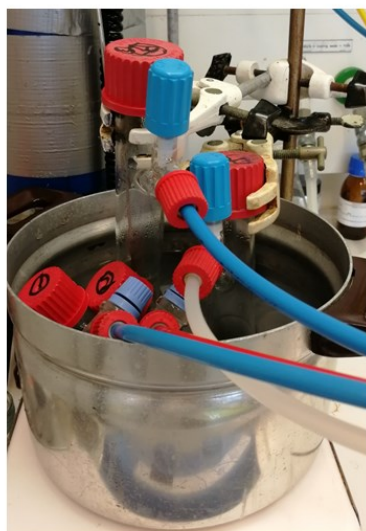

Purification of compound **12so**  
@2.3 gram scale

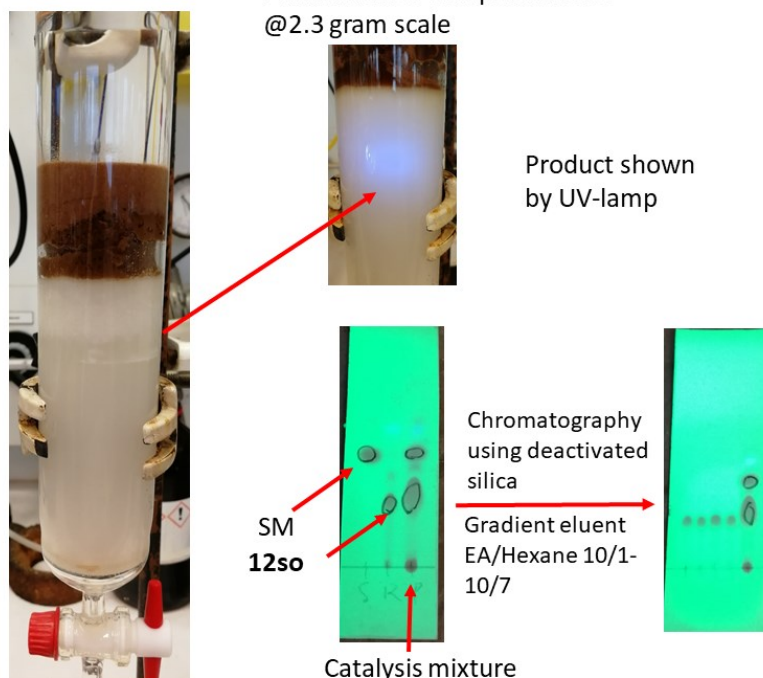

Isolated by chromatography using deactivated silica gel and ethyl acetate and petroleum ether (10:1 to 1:1) as the eluent.

**BAIPy**-Ir catalyst; Isolated yield of 65%.

**BPY**-Ir catalyst; Isolated yield of 0%.

Rtx-1 column, method: Initial temperature = 50 °C for 2 min, then 10°C/min to 300°C for 15 min. Retention time: t (Sub) = 19.867 min, t (*ortho*) = 25.213 min, t (*meta*) = 26.078 min and t (*para*) = 26.815 min.

<sup>1</sup>H NMR (400 MHz, CD<sub>2</sub>Cl<sub>2</sub>) δ 9.72 (brs, 1H, amide-NH), 8.05 (d, *J* = 7.9 Hz, 1H, Ha), 7.65 (d, *J* = 7.3 Hz, 1H, Hb), 7.54 (t, *J* = 7.3 Hz, 1H, Hc), 7.39 – 7.26 (m, 6H, Hd and Bn-aryl-H), 4.03 (d, *J* = 6.0 Hz, 2H, Bn-CH<sub>2</sub>), 1.27 (s, 12H, pin-Me).

<sup>13</sup>C NMR (126 MHz, CD<sub>2</sub>Cl<sub>2</sub>) δ 171.93, 137.53, 134.59, 132.93, 131.11, 128.89, 128.42, 128.17, 127.99, 124.77, 81.96, 44.86, 25.13.

HRMS (FD+(eiFi)) calcd. for C<sub>20</sub>H<sub>24</sub>BNO<sub>3</sub> [M]<sup>+</sup> 337.1853, found 337.1850.

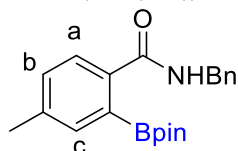

**13so**

*N*-Benzyl-4-methyl-2-(4,4,5,5-tetramethyl-1,3,2-dioxaborolan-2-yl)benzamide (**13so**)

Isolated by chromatography using deactivated silica gel and ethyl acetate and petroleum ether (6:1 to 1:1) as the eluent.

**BAIPy**-Ir catalyst; Isolated yield of 71%.

Rtx-1 column, method: Initial temperature = 50 °C for 2 min, then 10°C/min to 300°C for 15 min. Retention time: t (Sub) = 21.605 min, t (*ortho*) = 26.025 min, t (*meta*) = 31.597 min.

<sup>1</sup>H NMR (400 MHz, CDCl<sub>3</sub>) δ 7.85 – 7.72 (m, 1H, amide-NH), 7.61 – 7.57 (m, 1H, Ha), 7.42 (s, 1H, Hc), 7.36 – 7.27 (m, 5H, Bn-aryl-H), 7.11 (d, *J* = 7.9 Hz, 1H, Hb), 4.43 – 4.39 (m, 2H, Bn-CH<sub>2</sub>), 2.37 (s, 3H, aryl-Me), 1.31 (s, 12H, pin-Me).

<sup>13</sup>C NMR (101 MHz, CDCl<sub>3</sub>) δ 170.37, 142.27, 137.51, 133.23, 132.78, 129.24, 128.82, 128.26, 127.83, 124.19, 82.54, 44.80, 25.09.

HRMS (FD+(eiFi)) calcd. for C<sub>21</sub>H<sub>26</sub>BNO<sub>3</sub> [M]<sup>+</sup> 351.2010, found 351.2004.

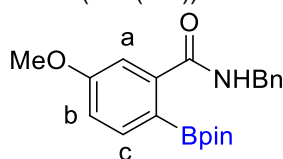

**14so**

*N*-Benzyl-5-methoxy-2-(4,4,5,5-tetramethyl-1,3,2-dioxaborolan-2-yl)benzamide (**14so**)

Isolated by chromatography using deactivated silica gel and ethyl acetate and petroleum ether (10:1 to 1:1) as the eluent.

**BAIPy**-Ir catalyst; Isolated yield of 81%.

Rtx-1 column, method: Initial temperature = 50 °C for 2 min, then 10°C/min to 300°C for 15 min. Retention time: t (Sub) = 22.013 min, t (*ortho*) = 26.440 min, t (*meta*) = 26.890 min.

## SUPPORTING INFORMATION

$^1\text{H}$  NMR (500 MHz, THF- $d_6$ )  $\delta$  8.07 (s, 1H, amide-NH), 7.42 (d,  $J$  = 8.1 Hz, 1H, Hc), 7.40 – 7.38 (m, 2H), 7.29 – 7.26 (m, 2H), 7.21 – 7.18 (m, 2H), 6.95 (dd,  $J$  = 8.2, 2.4 Hz, 1H, Hb), 4.56 (d,  $J$  = 5.9 Hz, 2H, Bn-CH<sub>2</sub>), 3.78 (s, 3H, OMe), 1.29 (s, 12H, pin-Me).

$^{13}\text{C}$  NMR (126 MHz, THF- $d_6$ )  $\delta$  169.13, 161.12, 142.22, 140.45, 134.63, 128.82, 128.51, 127.45, 115.71, 111.58, 83.20, 55.29, 44.34, 24.82.

HRMS (FD+(eiFi)) calcd. for C<sub>21</sub>H<sub>26</sub>BNO<sub>4</sub> [M]<sup>+</sup> 367.1959, found 367.1963.

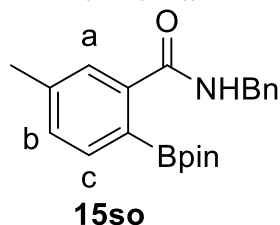

*N*-Benzyl-5-methyl-2-(4,4,5,5-tetramethyl-1,3,2-dioxaborolan-2-yl)benzamide (**15so**)

Purification of compound **15so**

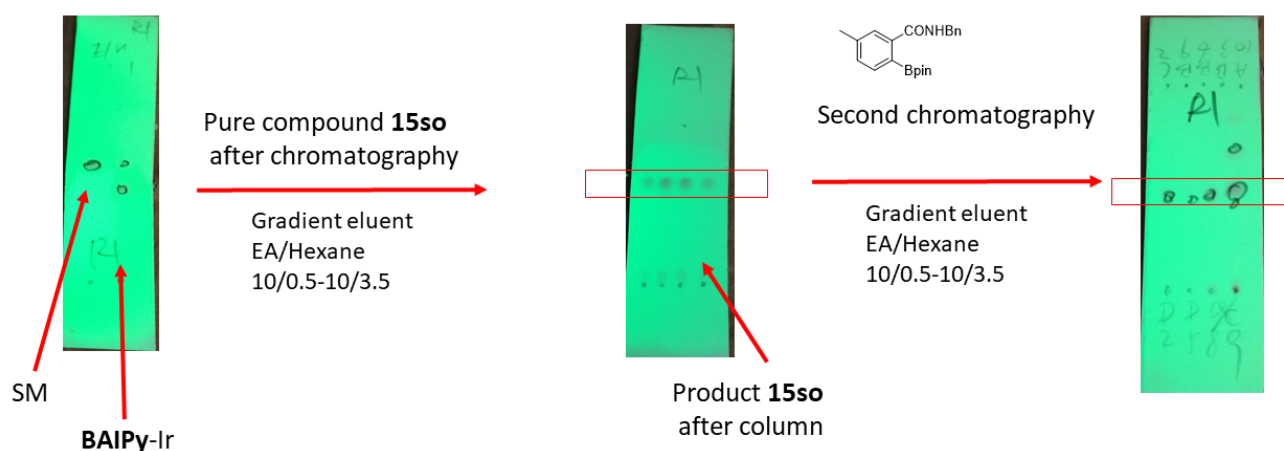

Isolated by chromatography using deactivated silica gel and ethyl acetate and petroleum ether (10:0.5 to 10:3.5) as the eluent.

**BAIPy-Ir** catalyst; Isolated yield of 62%.

Rtx-1 column, method: Initial temperature = 50 °C for 2 min, then 10°C/min to 300°C for 15 min. Retention time:  $t$  (Sub) = 20.753 min,  $t$  (*ortho*) = 25.383 min,  $t$  (*meta*) = 23.213 min.

$^1\text{H}$  NMR (500 MHz CD<sub>2</sub>Cl<sub>2</sub>)  $\delta$  8.66 – 8.59 (m, 1H, amide-NH), 7.71 – 7.67 (m, 1H, Ha), 7.55 – 7.51 (m, 1H, Hc), 7.35 – 7.26 (m, 6H, Hb & Bn-aryl-H), 4.25 (d,  $J$  = 5.7 Hz, 2H, Bn-CH<sub>2</sub>), 2.37 (s, 2H, aryl-Me), 1.27 (s, 12H, pin-Me).

$^{13}\text{C}$  NMR (126 MHz, CD<sub>2</sub>Cl<sub>2</sub>)  $\delta$  171.05, 138.14, 136.80, 132.94, 132.15, 128.91, 128.37, 128.34, 127.88, 125.53, 82.71, 44.67, 25.12, 21.47.

HRMS (FD+(eiFi)) calcd. for C<sub>21</sub>H<sub>26</sub>BNO<sub>3</sub> [M]<sup>+</sup> 351.2010, found 351.2011.



## SUPPORTING INFORMATION

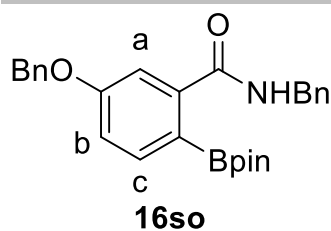*N*-Benzyl-5-(benzyloxy)-2-(4,4,5,5-tetramethyl-1,3,2-dioxaborolan-2-yl)benzamide (**16so**)Purification of compound **16so**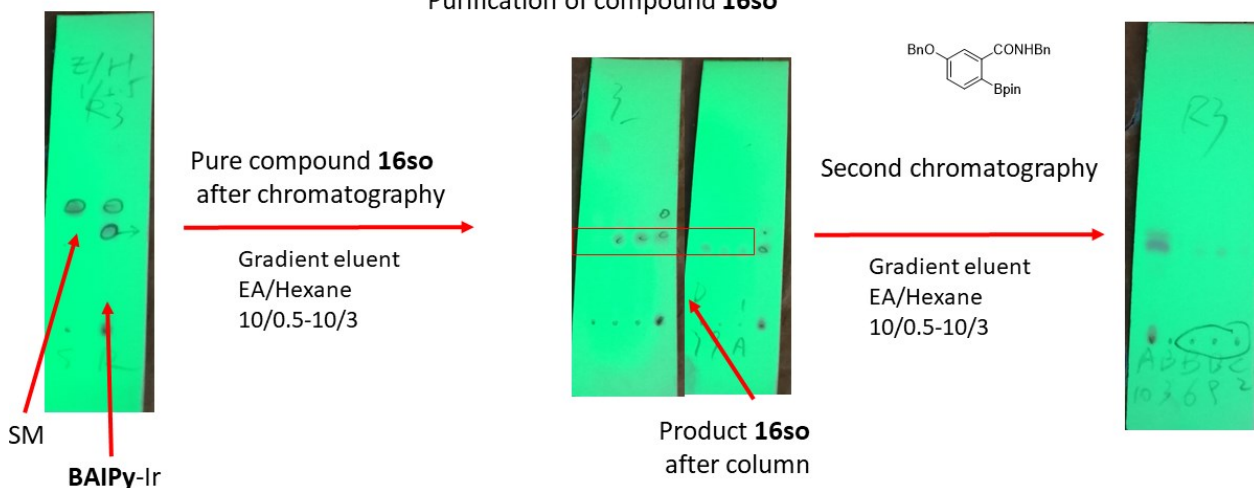

Isolated by chromatography using deactivated silica gel and ethyl acetate and petroleum ether (10:0.5 to 10:4.0) as the eluent.

**BAIPy-Ir** catalyst; Isolated yield of 69%.

$^1\text{H NMR}$  (500 MHz  $\text{CD}_2\text{Cl}_2$ )  $\delta$  7.61 (d,  $J = 8.1$  Hz, 1H, Hc), 7.50 – 7.25 (m, 11H, 2xBn-aryl & Ha), 7.05 (dd,  $J = 8.2, 2.6$  Hz, 1H, Hb), 6.95 (s, 1H, amide-NH), 5.11 (s, 2H, OBn- $\text{CH}_2$ ), 4.59 (d,  $J = 5.7$  Hz, 2H, NHBn- $\text{CH}_2$ ), 1.29 (s, 12H, pin-Me).

$^{13}\text{C NMR}$  (126 MHz,  $\text{CD}_2\text{Cl}_2$ )  $\delta$  169.13, 160.52, 142.35, 138.86, 137.09, 136.30, 128.98, 128.94, 128.44, 128.33, 127.96, 127.78, 116.69, 113.71, 84.20, 70.44, 44.61, 25.05.

HRMS (FD+(eiFi)) calcd. for  $\text{C}_{27}\text{H}_{30}\text{BNO}_4$   $[\text{M}]^+$  443.2273, found 443.2272.

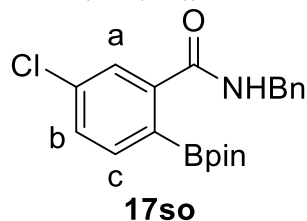*N*-Benzyl-5-chloro-2-(4,4,5,5-tetramethyl-1,3,2-dioxaborolan-2-yl)benzamide (**17so**)Purification of compound **17so**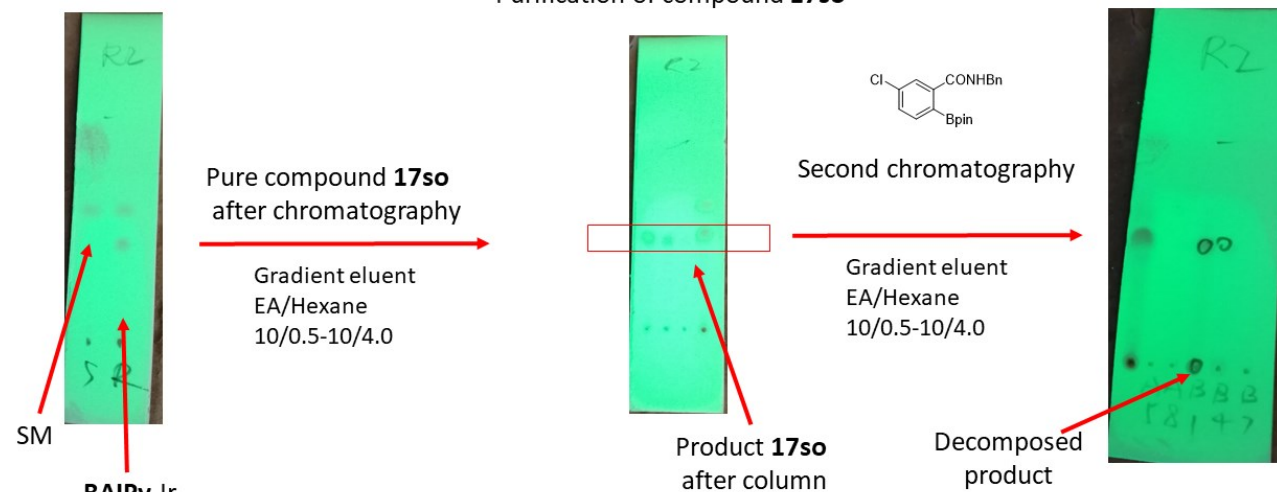

Isolated by chromatography using deactivated silica gel and ethyl acetate and petroleum ether (10:0.5 to 10:4.0) as the eluent.

## SUPPORTING INFORMATION

**BAIPy-Ir** catalyst; Isolated yield of 39%.

Rtx-1 column, method: Initial temperature = 50 °C for 2 min, then 10°C/min to 300°C for 15 min. Retention time:  $t$  (Sub) = 20.888 min,  $t$  (*ortho*) = 25.492 min,  $t$  (*meta*) = 26.518 min.

$^1\text{H}$  NMR (500 MHz  $\text{CD}_2\text{Cl}_2$ )  $\delta$  7.56 (d,  $J$  = 7.3 Hz, 2H, Hb&c), 7.45 – 7.33 (m, 7H, Ha & Bn-aryl-H & amide-NH), 4.74 (d,  $J$  = 5.7 Hz, 2H, Bn- $\text{CH}_2$ ), 1.31 (s, 12H, pin-Me).

$^{13}\text{C}$  NMR (126 MHz,  $\text{CD}_2\text{Cl}_2$ )  $\delta$  169.46, 137.19, 133.27, 131.12, 131.10, 130.57, 130.19, 129.23, 128.37, 128.32, 82.49, 45.74, 25.29.

HRMS (FD+(eiFi)) calcd. for  $\text{C}_{20}\text{H}_{23}\text{BCINO}_3$   $[\text{M}]^+$  371.1463, found 371.1478.

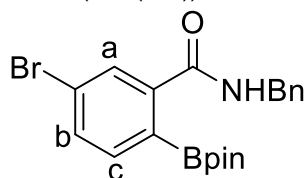

**18so**

*N*-Benzyl-5-bromo-2-(4,4,5,5-tetramethyl-1,3,2-dioxaborolan-2-yl)benzamide (**18so**)

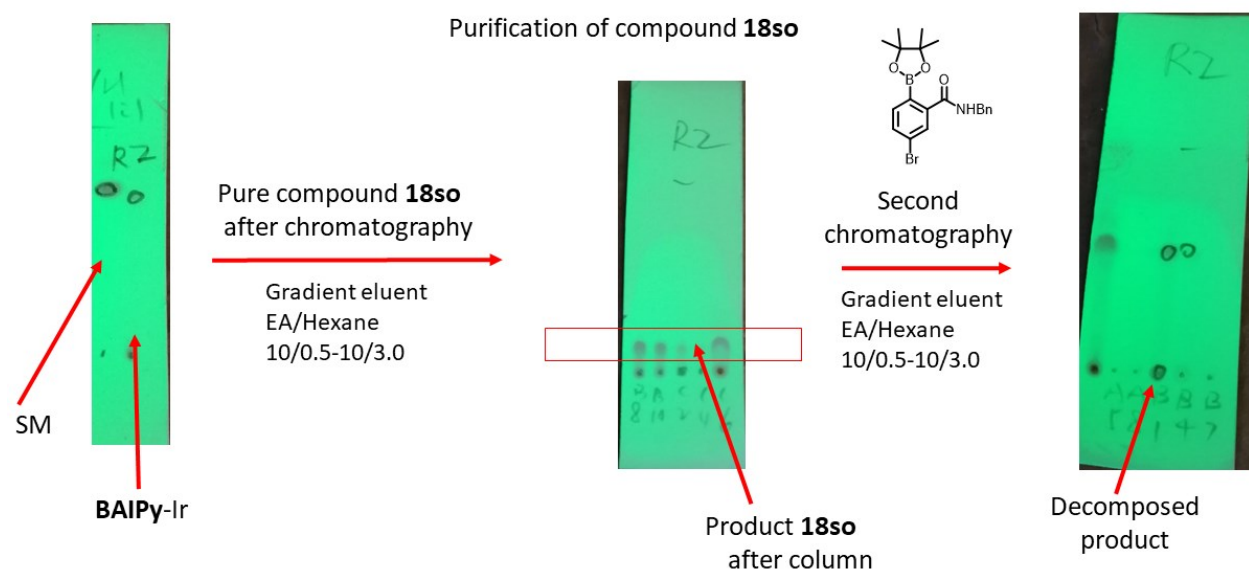

Isolated by chromatography using deactivated silica gel and ethyl acetate and petroleum ether (10:0.5 to 10:3.0) as the eluent.

**BAIPy-Ir** catalyst; Isolated yield of 64%.

$^1\text{H}$  NMR (500 MHz  $\text{CD}_2\text{Cl}_2$ )  $\delta$  9.54 (s, 1H, amide-NH), 8.19 (s, 1H, Ha), 7.67 (dd,  $J$  = 7.7, 1.8 Hz, 1H, Hb), 7.57 (d,  $J$  = 7.9 Hz, 1H, Hc), 7.43 – 7.23 (m, 5H, Bn-aryl-H), 4.11 (d,  $J$  = 5.9 Hz, 2H, Bn- $\text{CH}_2$ ), 1.27 (s, 12H, pin-Me).

7.62 (d,  $J$  = 7.7 Hz, 1H, Ha), 7.58 (d,  $J$  = 7.4 Hz, 1H, Hd), 7.49 (t,  $J$  = 7.3 Hz, 1H, Hb), 7.44 (t,  $J$  = 7.5 Hz, 1H, Hc), 6.85 (d,  $J$  = 8.6 Hz, 1H, amide-NH), 4.71 (dd,  $J$  = 8.6, 5.2 Hz, 1H, He), 3.76 (s, 3H, OMe), 2.26 (h,  $J$  = 6.7 Hz, 1H, Hg), 1.35 (d,  $J$  = 5.9 Hz, 12H, pin-Me), 1.03 – 0.98 (m, 6H).

$^{13}\text{C}$  NMR (126 MHz,  $\text{CD}_2\text{Cl}_2$ )  $\delta$  170.28, 137.30, 137.23, 135.68, 133.24, 128.97, 128.45, 128.15, 127.58, 122.79, 82.61, 44.98, 25.23.

HRMS (FD+(eiFi)) calcd. for  $\text{C}_{20}\text{H}_{23}\text{BBrNO}_3$   $[\text{M}]^+$  415.0954, found 415.0950.

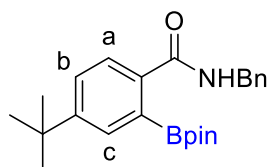

**19so**

*N*-Benzyl-4-(tert-butyl)-2-(4,4,5,5-tetramethyl-1,3,2-dioxaborolan-2-yl)benzamide (**19so**)

Isolated by chromatography using deactivated silica gel and ethyl acetate and petroleum ether (10:1 to 1:1) as the eluent.

**BAIPy-Ir** catalyst; Isolated yield of 55%.

Rtx-1 column, method: Initial temperature = 50 °C for 2 min, then 10°C/min to 300°C for 15 min. Retention time:  $t$  (Sub) = 23.132 min.

$^1\text{H}$  NMR (500 MHz,  $\text{THF}-d_6$ )  $\delta$  8.43 (s, 1H, amide-NH), 7.63 (d,  $J$  = 8.2 Hz, 1H, Ha), 7.52 (d,  $J$  = 2.3 Hz, 1H, Hc), 7.37 – 7.34 (m, 3H), 7.28 – 7.25 (m, 2H), 7.21 – 7.18 (m, 1H, Hb), 4.52 (d,  $J$  = 5.8 Hz, 2H, Bn- $\text{CH}_2$ ), 1.32 (s, 9H, tert-butyl), 1.31 (s, 12H, pin-Me).

$^{13}\text{C}$  NMR (126 MHz,  $\text{THF}-d_6$ )  $\delta$  169.65, 153.94, 140.08, 135.79, 135.76, 128.88, 128.85, 128.42, 127.54, 125.49, 124.51, 82.67, 44.42, 35.28, 31.42, 24.97.

## SUPPORTING INFORMATION

HRMS (FD+(eiFi)) calcd. for  $C_{24}H_{32}BF_3NO_3 [M]^+$  393.2480, found 393.2494.

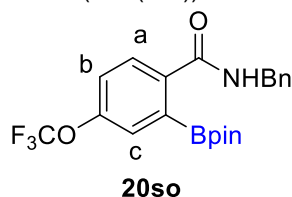

*N*-Benzyl-2-(4,4,5,5-tetramethyl-1,3,2-dioxaborolan-2-yl)-4-(trifluoromethoxy)benzamide (**20so**)

Isolated by chromatography using deactivated silica gel and ethyl acetate and petroleum ether (8:1 to 1:1) as the eluent.

**BAIPy**-Ir catalyst; Isolated yield of 63%.

Rtx-1 column, method: Initial temperature = 50 °C for 2 min, then 10°C/min to 300°C for 15 min. Retention time:  $t$  (Sub) = 20.075 min,  $t$  (*ortho*) = 24.377 min,  $t$  (*meta*) = 25.197 min.

$^1H$  NMR (500 MHz,  $CDCl_3$ )  $\delta$  9.37 (s, 1H, amide-NH), 8.00 (d,  $J$  = 8.2 Hz, 1H, Ha), 7.41 (s, 1H, Hc), 7.32 – 7.27 (m, 3H), 7.20 – 7.19 (m, 2H), 7.11 (d,  $J$  = 8.1 Hz, 1H, Hb), 4.16 (m, 2H, Bn- $CH_2$ ), 1.23 (s, 12H, pin-Me).

$^{13}C$  NMR (126 MHz,  $CDCl_3$ )  $\delta$  170.37, 152.94, 136.33, 132.38, 128.91, 128.14, 127.93, 126.08, 122.86, 120.27, 82.17, 44.99, 24.99.

HRMS (FD+(eiFi)) calcd. for  $C_{21}H_{23}BF_3NO_4 [M]^+$  421.1676, found 421.1672.

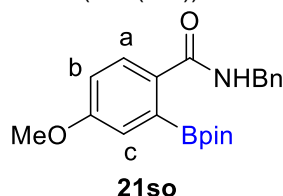

*N*-Benzyl-4-methoxy-2-(4,4,5,5-tetramethyl-1,3,2-dioxaborolan-2-yl)benzamide (**21so**)

Purification of compound **21so**

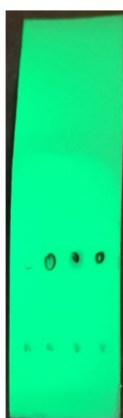

Pure compound **21so**  
after chromatography

Gradient eluent  
EA/Hexane 10/1-  
10/7

Isolated by chromatography using deactivated silica gel and ethyl acetate and petroleum ether (10:1 to 1:1) as the eluent.

**BAIPy**-Ir catalyst; Isolated yield of 43%.

Rtx-1 column, method: Initial temperature = 50 °C for 2 min, then 10°C/min to 300°C for 15 min. Retention time:  $t$  (Sub) = 22.408 min,  $t$  (*ortho*) = 26.468 min,  $t$  (*meta*) = 27.472 min.

$^1H$  NMR (500 MHz,  $CDCl_3$ )  $\delta$  8.35 (brs, 1H, amide-NH), 7.75 – 7.72 (m, 1H, Ha), 7.36 – 7.26 (m, 5H), 7.11 (s, 1H, Hc), 6.81 – 6.77 (m, 1H, Hb), 4.36 – 4.34 (m, 2H, Bn- $CH_2$ ), 3.87 (s, 3H, OMe), 1.33 (s, 12H, pin-Me).

$^{13}C$  NMR (126 MHz,  $CDCl_3$ )  $\delta$  170.86, 163.51, 137.07, 128.83, 128.27, 127.92, 126.75, 125.49, 115.33, 114.70, 82.03, 55.54, 45.06, 25.12.

HRMS (FD+(eiFi)) calcd. for  $C_{21}H_{26}BNO_4 [M]^+$  367.1959, found 367.1956.

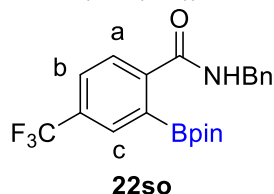

*N*-Benzyl-2-(4,4,5,5-tetramethyl-1,3,2-dioxaborolan-2-yl)-4-(trifluoromethoxy)benzamide (**22so**)

Isolated by chromatography using deactivated silica gel and ethyl acetate and petroleum ether (10:1 to 1:1) as the eluent.

**BAIPy**-Ir catalyst; Isolated yield of 40%.

## SUPPORTING INFORMATION

$^1\text{H}$  NMR (500 MHz,  $\text{CDCl}_3$ )  $\delta$  8.67 (s, 1H, amide-NH), 7.94 (d,  $J$  = 8.3 Hz, 1H, Ha), 7.87 (s, 1H, Hc), 7.57 – 7.56 (m, 2H), 7.36 – 7.22 (m, 4H), 4.29 (d,  $J$  = 5.5 Hz, 2H, Bn- $\text{CH}_2$ ), 1.28 (s, 12H, pin-Me).

$^{13}\text{C}$  NMR (126 MHz,  $\text{CDCl}_3$ )  $\delta$  169.66, 138.63, 136.50, 133.83 (m, two bonds C-F coupling), 128.95 (m, three bond C-F coupling), 128.77, 128.15, 128.01, 126.19 (m, one bond C-F coupling), 125.59 (m, three bond C-F coupling), 124.79, 82.89, 45.01, 24.99. HRMS (FD+(eiFi)) calcd. for  $\text{C}_{21}\text{H}_{23}\text{BF}_3\text{NO}_3$   $[\text{M}]^+$  405.1727, found 405.1743.

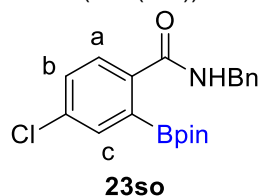

*N*-Benzyl-4-chloro-2-(4,4,5,5-tetramethyl-1,3,2-dioxaborolan-2-yl)benzamide (**23so**)

Isolated by chromatography using deactivated silica gel and ethyl acetate and petroleum ether (10:1 to 1:1) as the eluent.

**BAIPy**-Ir catalyst; Isolated yield of 75%.

Rtx-1 column, method: Initial temperature = 50 °C for 2 min, then 10°C/min to 300°C for 15 min. Retention time:  $t$  (Sub) = 21.518 min,  $t$  (*ortho*) = 25.950 min,  $t$  (*meta*) = 26.437 min.

$^1\text{H}$  NMR (500 MHz,  $\text{THF}-d_6$ )  $\delta$  8.52 (s, 1H, amide-NH), 7.65 (d,  $J$  = 8.3 Hz, 1H, Ha), 7.43 – 7.42 (m, 1H, Hc), 7.38 – 7.34 (m, 2H), 7.38 – 7.36 (m, 2H), 7.34 – 7.28 (m, 1H, Hb), 7.24 – 7.21 (m, 1H), 4.61 (d,  $J$  = 5.8 Hz, 2H, Bn- $\text{CH}_2$ ), 1.31 (s, 12H, pin-Me).

$^{13}\text{C}$  NMR (126 MHz,  $\text{THF}-d_6$ )  $\delta$  168.90, 139.49, 137.86, 136.29, 135.24, 132.01, 129.00, 128.60, 128.36, 127.82, 125.89, 82.79, 44.84, 24.82.

HRMS (FD+(eiFi)) calcd. for  $\text{C}_{20}\text{H}_{23}\text{BClNO}_3$   $[\text{M}]^+$  371.1463, found 371.1456.

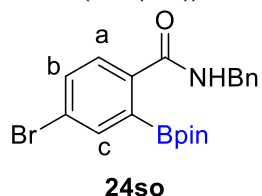

*N*-Benzyl-4-bromo-2-(4,4,5,5-tetramethyl-1,3,2-dioxaborolan-2-yl)benzamide (**24so**)

Isolated by chromatography using deactivated silica gel and ethyl acetate and petroleum ether (10:1 to 1:1) as the eluent.

**BAIPy**-Ir catalyst; Isolated yield of 67%.

Rtx-1 column, method: Initial temperature = 50 °C for 2 min, then 10°C/min to 300°C for 15 min. Retention time:  $t$  (Sub) = 22.460 min,  $t$  (*ortho*) = 26.720 min,  $t$  (*meta*) = 39.940 min.

$^1\text{H}$  NMR (500 MHz,  $\text{THF}-d_6$ )  $\delta$  8.49 (s, 1H, amide-NH), 7.59 – 7.57 (m, 2H), 7.50 – 7.47 (m, 1H), 7.38 – 7.36 (m, 2H), 7.31 – 7.27 (m, 2H), 7.24 – 7.20 (m, 1H), 4.60 (d,  $J$  = 5.8 Hz, 2H, Bn- $\text{CH}_2$ ), 1.31 (s, 12H, pin-Me).

$^{13}\text{C}$  NMR (126 MHz,  $\text{THF}-d_6$ )  $\delta$  169.96, 139.51, 135.07, 131.37, 128.99, 128.60, 127.81, 126.13, 82.86, 44.83, 24.82.

HRMS (FD+(eiFi)) calcd. for  $\text{C}_{20}\text{H}_{23}\text{BBrNO}_3$   $[\text{M}]^+$  415.0940, found 415.0959.

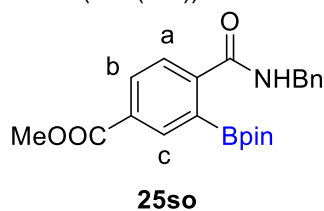

Methyl 4-(benzylcarbamoyl)-3-(4,4,5,5-tetramethyl-1,3,2-dioxaborolan-2-yl)benzoate (**25so**)

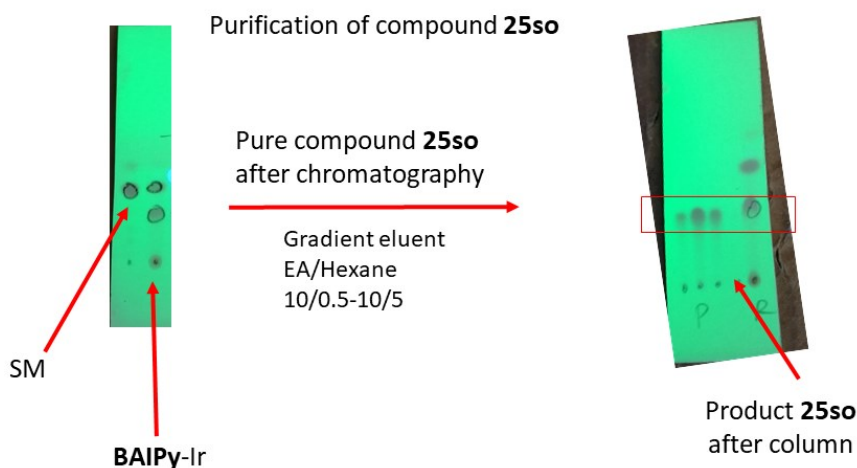

**BAIPy**-Ir catalyst; Isolated yield of 32%.

## SUPPORTING INFORMATION

Isolated by chromatography using deactivated silica gel and ethyl acetate and petroleum ether (5:1 to 2:1) as the eluent. Rtx-1 column, method: Initial temperature = 50 °C for 2 min, then 10°C/min to 300°C for 15 min. Retention time: t (Sub) = 24.250 min, t (*ortho*)= 28.308 min, t (*meta*)= 29.335 min.

<sup>1</sup>H NMR (500 MHz, CD<sub>2</sub>Cl<sub>2</sub>) δ 9.08 (s, 1H, amide-NH), 8.22 (s, 1H, Hc), 8.09 – 7.91 (m, 2H, Ha & Hb), 7.34 – 7.25 (m, 5H, Bn-aryl-H), 4.20 (d, *J* = 5.8 Hz, 2H, Bn-CH<sub>2</sub>), 3.94 (s, 3H, COOMe), 1.28 (s, 12H, pin-Me).

<sup>13</sup>C NMR (126 MHz, CD<sub>2</sub>Cl<sub>2</sub>) δ 170.39, 166.86, 139.50, 137.34, 133.47, 132.74, 129.92, 128.99, 128.35, 128.11, 124.93, 82.82, 52.64, 45.03, 25.11.

HRMS (FD+(eiFi)) calcd. for C<sub>22</sub>H<sub>26</sub>BF<sub>3</sub>NO<sub>5</sub> [M]<sup>+</sup> 395.1904, found 395.1959.

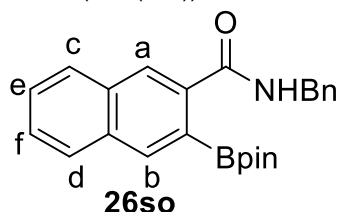

*N*-Benzyl-3-(4,4,5,5-tetramethyl-1,3,2-dioxaborolan-2-yl)-2-naphthamide (**26so**)

Purification of compound **26so**

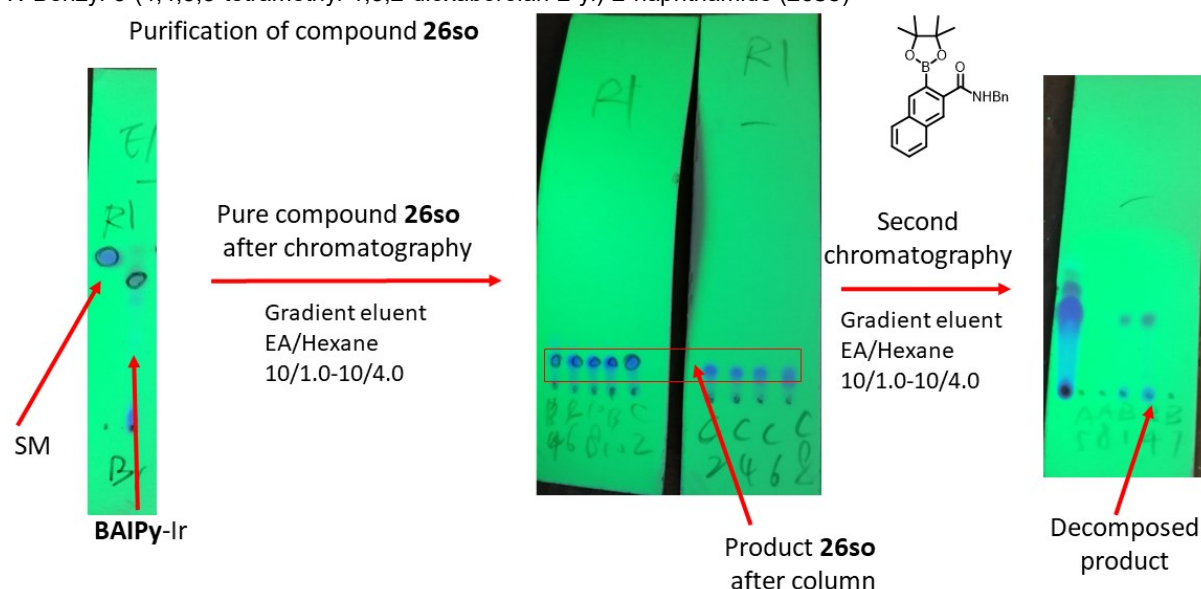

Isolated by chromatography using deactivated silica gel and ethyl acetate and petroleum ether (10:0.5 to 10:3.0) as the eluent. **BAIPy-Ir** catalyst; Isolated yield of 64%.

<sup>1</sup>H NMR (500 MHz CD<sub>2</sub>Cl<sub>2</sub>) δ 8.30 (s, 1H, amide-H), 8.15 (brs, 1H, Ha), 8.06 (s, 1H, Hb), 7.90 (d, *J* = 7.6 Hz, 1H, Hd), 7.87 – 7.82 (m, 1H, Hc), 7.56 – 7.50 (m, 2H, He&f), 7.33 – 7.25 (m, 5H, Bn-aryl-H), 4.33 (d, *J* = 5.8 Hz, 2H, Bn-CH<sub>2</sub>), 1.37 (s, 12H, pin-Me).

<sup>13</sup>C NMR (126 MHz, CD<sub>2</sub>Cl<sub>2</sub>) δ 170.44, 138.35, 135.09, 134.66, 133.21, 132.95, 129.08, 128.92, 128.49, 128.23, 128.09, 127.84, 127.19, 125.47, 83.34, 44.67, 25.19.

HRMS (FD+(eiFi)) calcd. for C<sub>24</sub>H<sub>26</sub>BNO<sub>3</sub> [M]<sup>+</sup> 387.2010, found 387.1994.

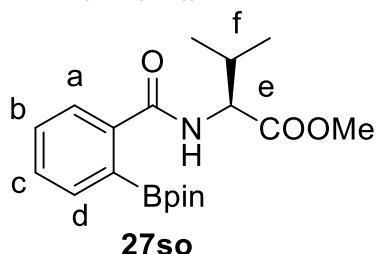

Methyl (2-(4,4,5,5-tetramethyl-1,3,2-dioxaborolan-2-yl)benzoyl)valinate (**27so**)

Isolated by chromatography using deactivated silica gel and ethyl acetate and petroleum ether (5:1 to 2:1) as the eluent.

**BAIPy-Ir** catalyst; Isolated yield of 63%.

<sup>1</sup>H NMR (500 MHz CD<sub>2</sub>Cl<sub>2</sub>) δ 7.62 (d, *J* = 7.7 Hz, 1H, Ha), 7.58 (d, *J* = 7.4 Hz, 1H, Hd), 7.49 (t, *J* = 7.3 Hz, 1H, Hb), 7.44 (t, *J* = 7.5 Hz, 1H, Hc), 6.85 (d, *J* = 8.6 Hz, 1H, amide-NH), 4.71 (dd, *J* = 8.6, 5.2 Hz, 1H, He), 3.76 (s, 3H, OMe), 2.26 (h, *J* = 6.7 Hz, 1H, Hf), 1.35 (d, *J* = 5.9 Hz, 12H, pin-Me), 1.03 – 0.98 (m, 6H, isopropyl-Me).

<sup>13</sup>C NMR (126 MHz, CD<sub>2</sub>Cl<sub>2</sub>) δ 172.61, 168.99, 138.57, 133.24, 130.97, 129.36, 125.24, 83.85, 58.33, 52.48, 32.01, 25.02, 24.95, 19.23, 18.25.

HRMS (FD+(eiFi)) calcd. for C<sub>19</sub>H<sub>28</sub>BNO<sub>5</sub> [M]<sup>+</sup> 361.2064, found 361.2059.

## SUPPORTING INFORMATION

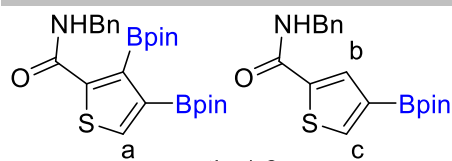

ratio 1:2

**28so+28sm**

*N*-benzyl-3,4-bis(4,4,5,5-tetramethyl-1,3,2-dioxaborolan-2-yl)thiophene-2-carboxamide (**28so**) and *N*-Benzyl-4-(4,4,5,5-tetramethyl-1,3,2-dioxaborolan-2-yl)thiophene-2-carboxamide (**28sm**)

Isolated by chromatography using deactivated silica gel and ethyl acetate and petroleum ether (10:1 to 1:1) as the eluent.

**BAIPy**-Ir catalyst; Isolated yield of 85%.

<sup>1</sup>H NMR (500 MHz, CDCl<sub>3</sub>) **28so** δ 9.11 (t, *J* = 4.9 Hz, 1H, amide-NH), 7.92 (s, 1H, Ha), 7.31 – 7.27 (m, 5H, Bn-aryl-H), 4.51 (d, *J* = 4.8 Hz, 2H, Bn-CH<sub>2</sub>), 1.29 (s, 12H, pin-Me), 1.18 (s, 12H, pin-Me).

<sup>1</sup>H NMR (500 MHz, CDCl<sub>3</sub>) **28sm** δ 7.57 (d, *J* = 3.7 Hz, 1H, Hb), 7.48 (d, *J* = 3.6 Hz, 1H, Hc), 7.27 – 7.18 (m, 5H, Bn-aryl-H), 6.68 (t, *J* = 5.8 Hz, 1H, amide-NH), 4.53 (d, *J* = 5.8 Hz, 2H, Bn-CH<sub>2</sub>), 1.29 (s, 12H, pin-Me).

<sup>13</sup>C NMR (126 MHz, CDCl<sub>3</sub>) **28so** and **28sm** 1:2 mixtures δ 161.80, 161.77, 156.14, 146.13, 144.50, 138.04, 137.76, 137.18, 129.63, 128.76, 128.70, 128.68, 127.88, 127.63, 127.60, 84.89, 84.55, 84.42, 44.73, 44.04, 24.88, 24.80, 24.51.

**28sm** HRMS (FD+(eiFi)) calcd. for C<sub>18</sub>H<sub>22</sub>BNO<sub>3</sub>S [M]<sup>+</sup> 343.1413, found 343.1378.

**28so** HRMS (FD+(eiFi)) calcd. for C<sub>24</sub>H<sub>33</sub>B<sub>2</sub>NO<sub>5</sub>S [M]<sup>+</sup> 469.2274, found 469.2272.

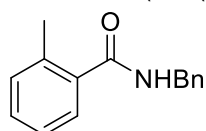**29s**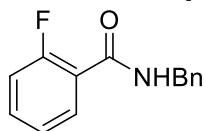**30s**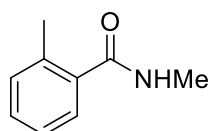**31s**

**BAIPy**-Ir catalyst showed no reactivity for *Ortho*-functionalized benzamides under optimized reaction conditions.

N.R. of H/E 1/1 to 4/1

N.R. of H/E 4/1

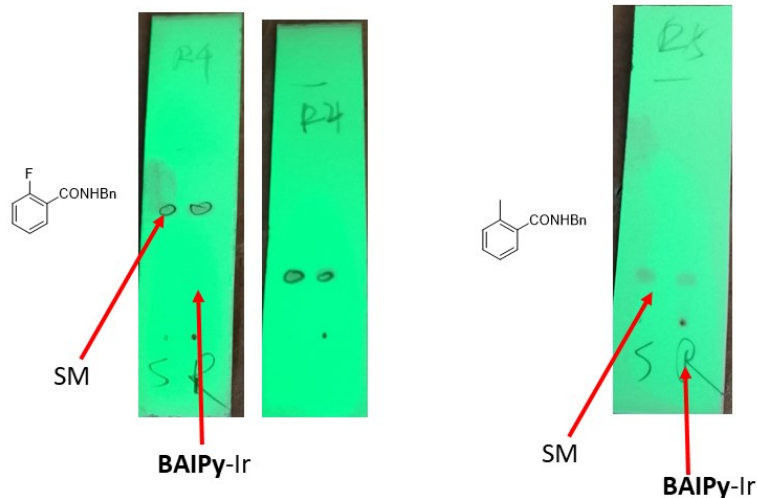Application of the supramolecular catalyst in gram scale *ortho*-CH borylation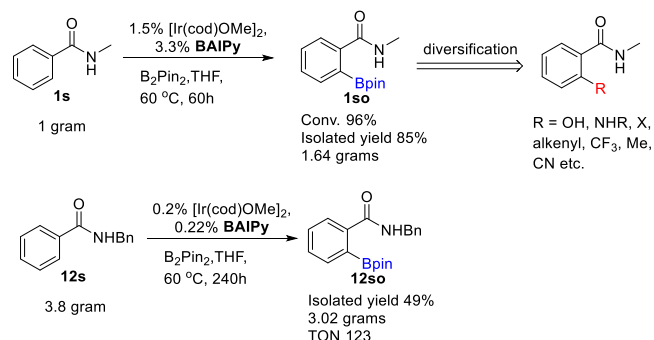

Scheme S3. Application of the supramolecular catalyst in gram scale *ortho*-CH borylation.

## SUPPORTING INFORMATION

## Spectra

SB-24-04-17-01-First.1.fid —

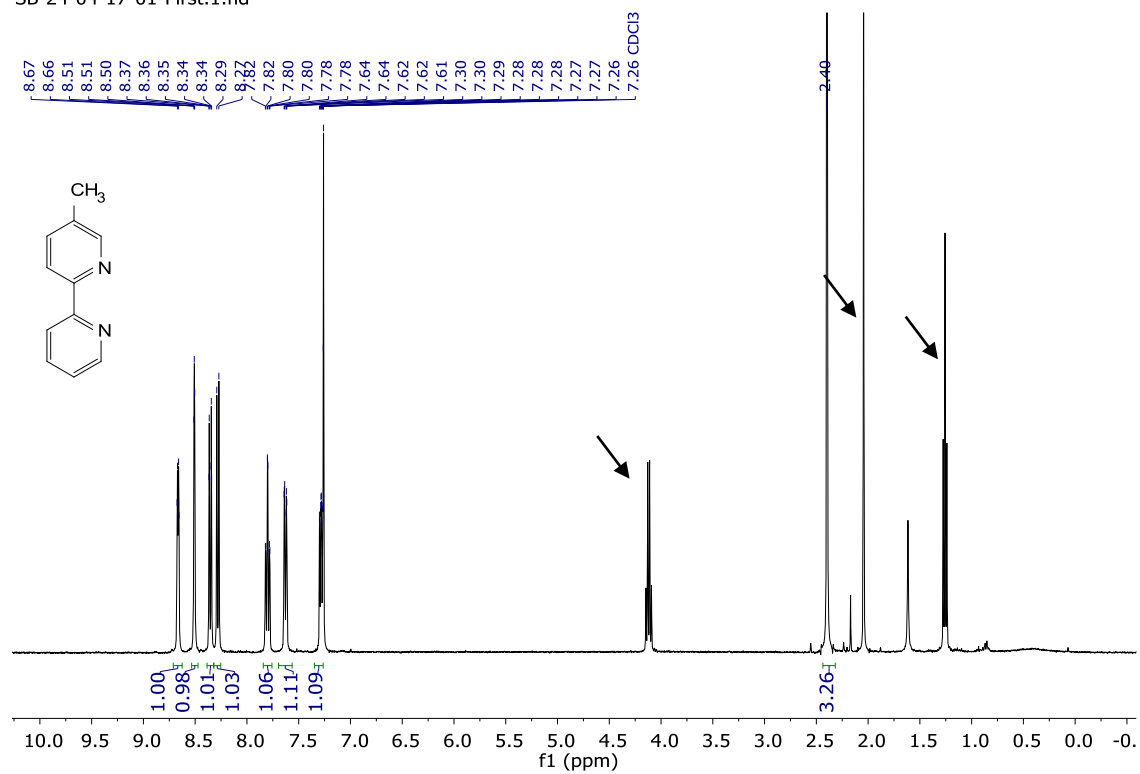Figure S11. <sup>1</sup>H NMR spectra of 5-methyl-2,2'-bipyridine **2** (ethyl acetate indicated by arrows)

## SUPPORTING INFORMATION

SB-03-04-17-03.1.fid — bipyridine-5-carboxylic acid

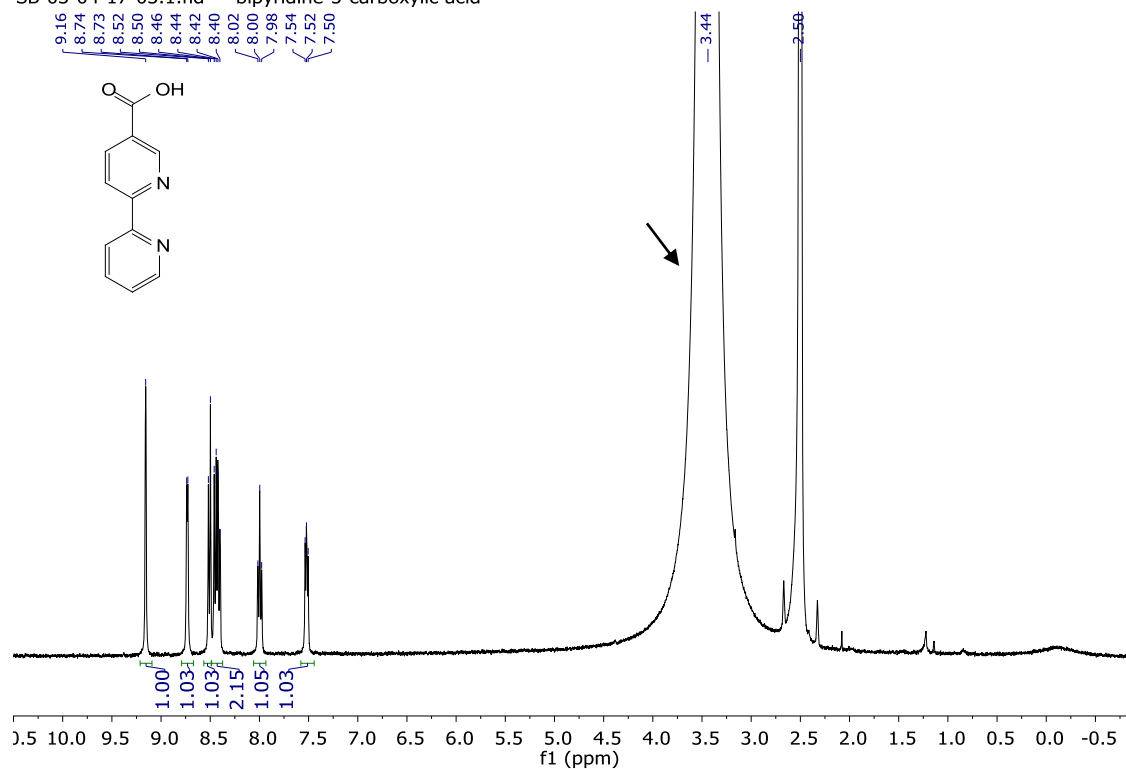Figure S12. <sup>1</sup>H NMR spectra of 2,2'-Bipyridinyl-5-carboxylic acid **3** (water indicated by arrows)

SB-03-01-18-01-pdb-dmso-500M.1.fid —

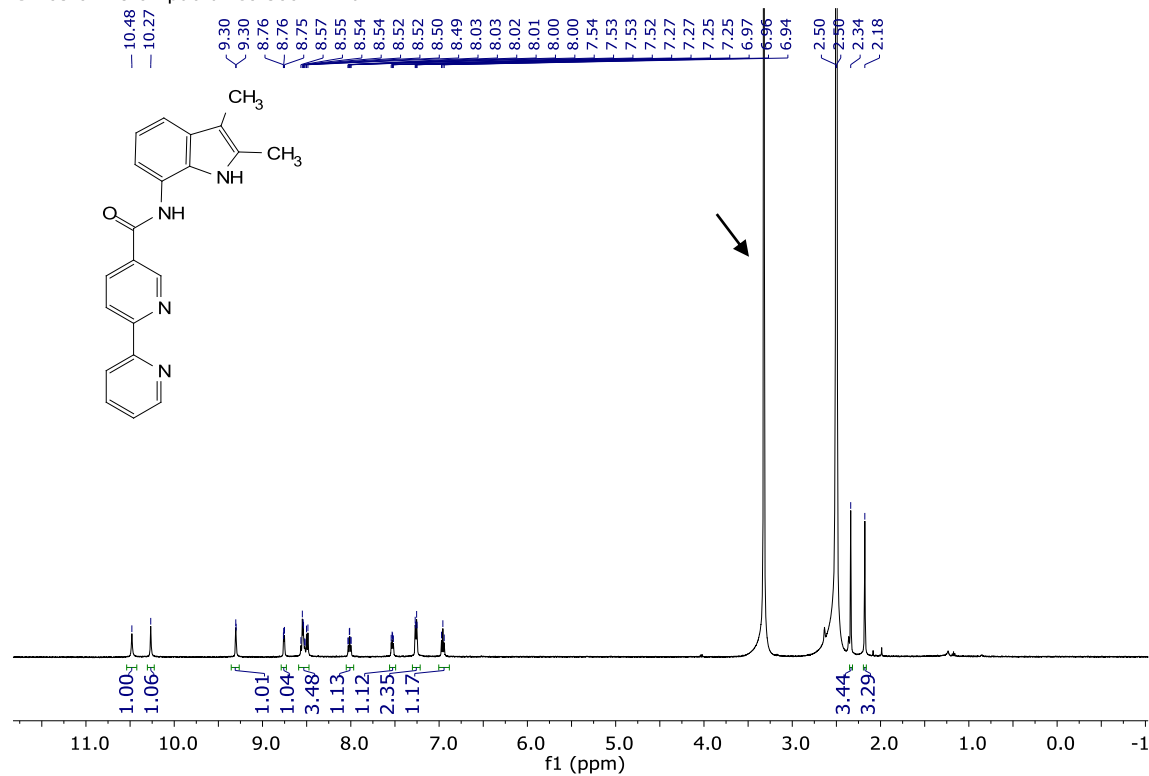Figure S13. <sup>1</sup>H NMR spectra of supramolecular ligand **BAIPy** (water indicated by arrows)



## SUPPORTING INFORMATION

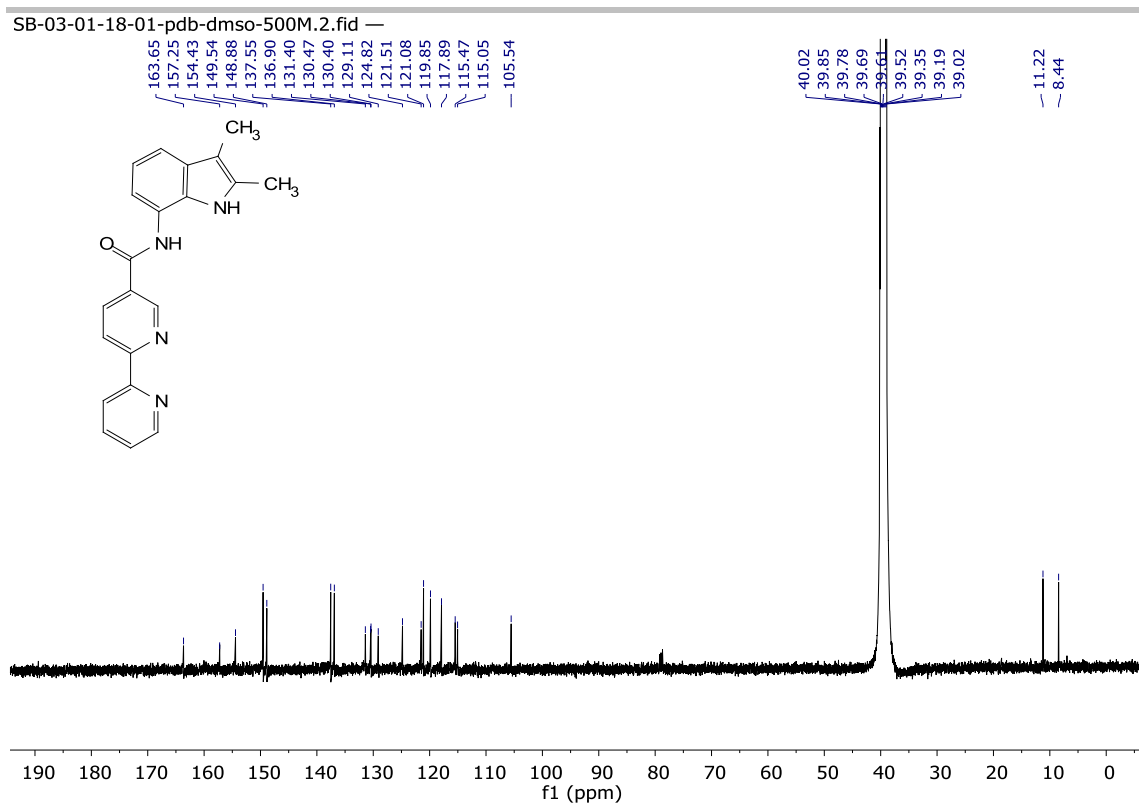Figure S14. <sup>13</sup>C NMR spectra of supramolecular ligand **BAIPy**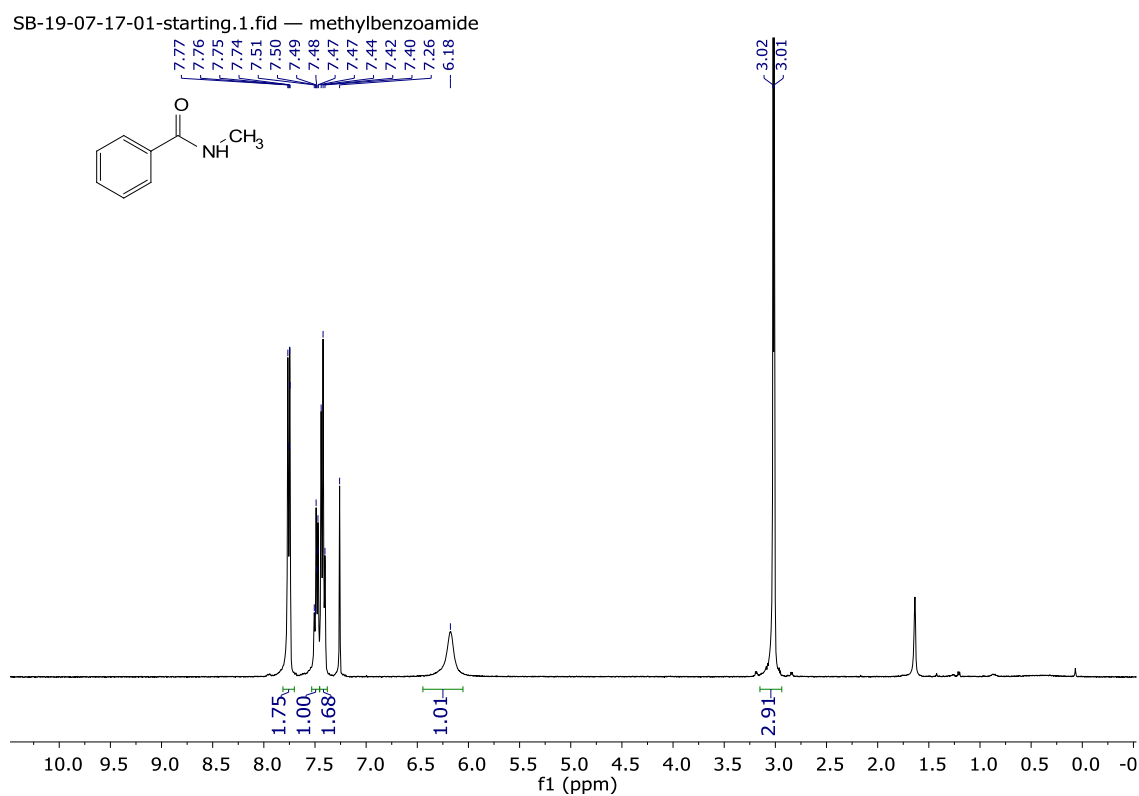Figure S15. <sup>1</sup>H NMR spectra of aromatic amide **1s**

## SUPPORTING INFORMATION

SB-18-9-18-NNdimethylbenzamide-400M.1.fid — tert-amide

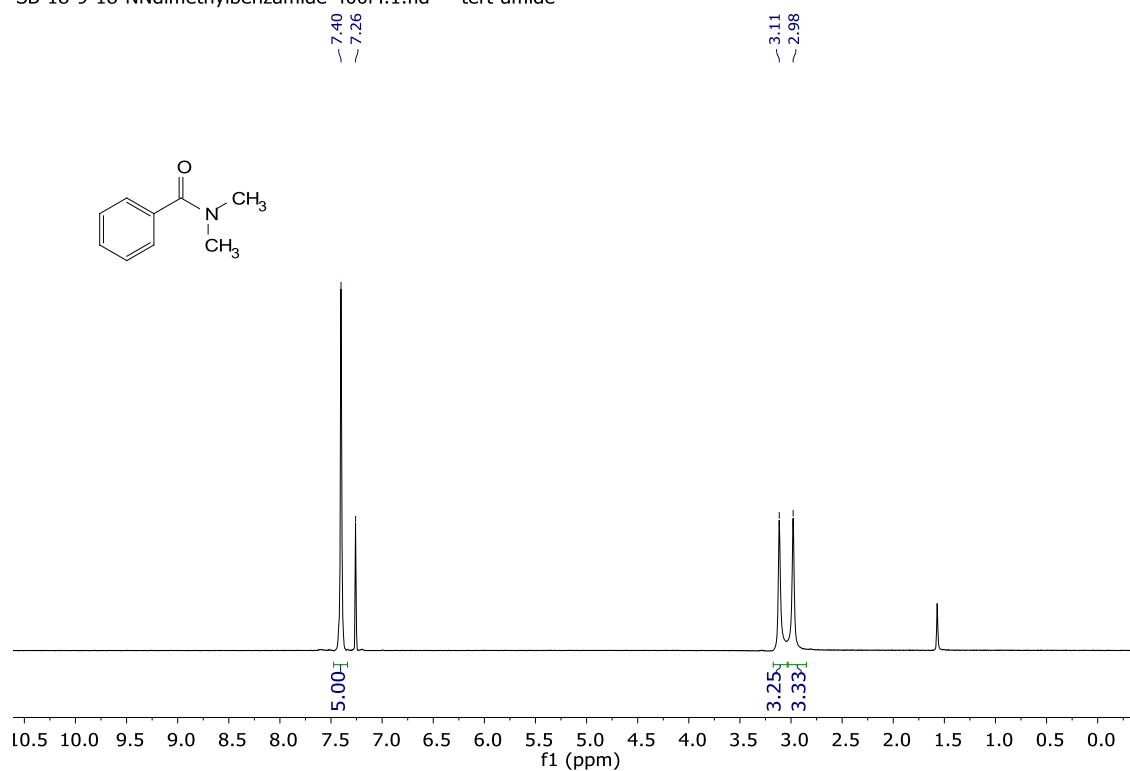Figure S16. <sup>1</sup>H NMR spectra of aromatic amide **2s**

SB-18-07-17-01.1.fid — methylbenzoate

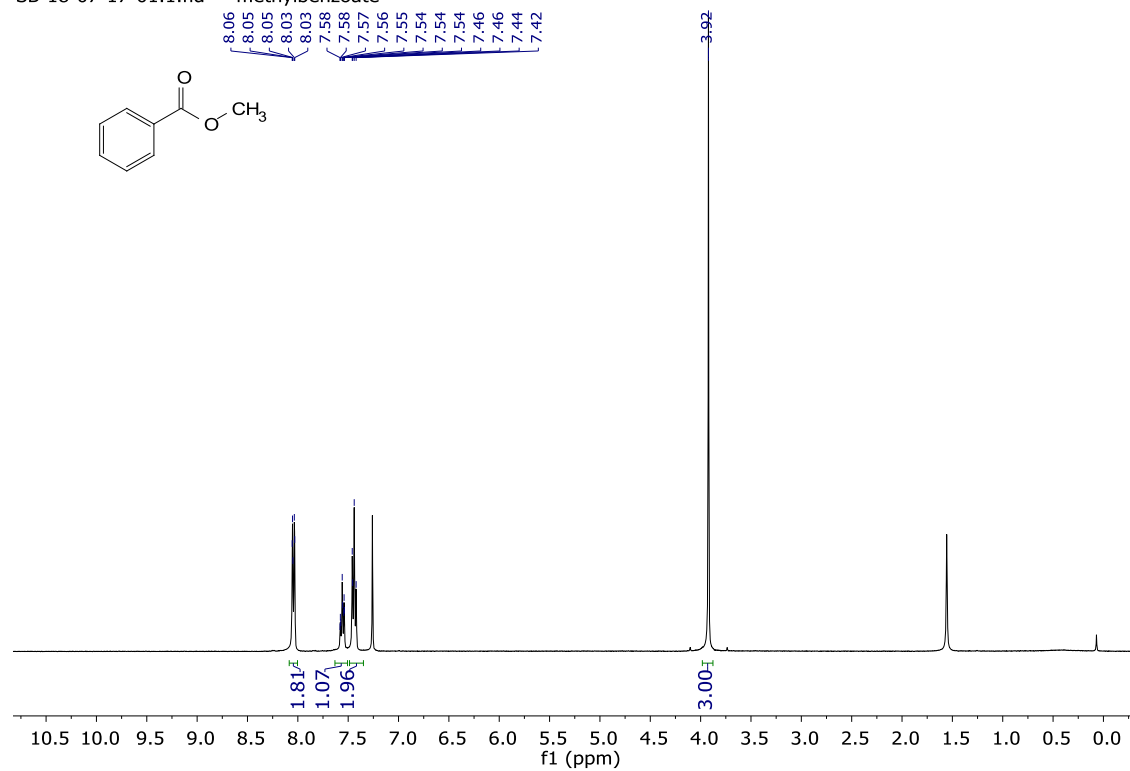Figure S17. <sup>1</sup>H NMR spectra of aromatic amide **3s**

## SUPPORTING INFORMATION

SB-22-09-17-01-500M.1.fid — amide

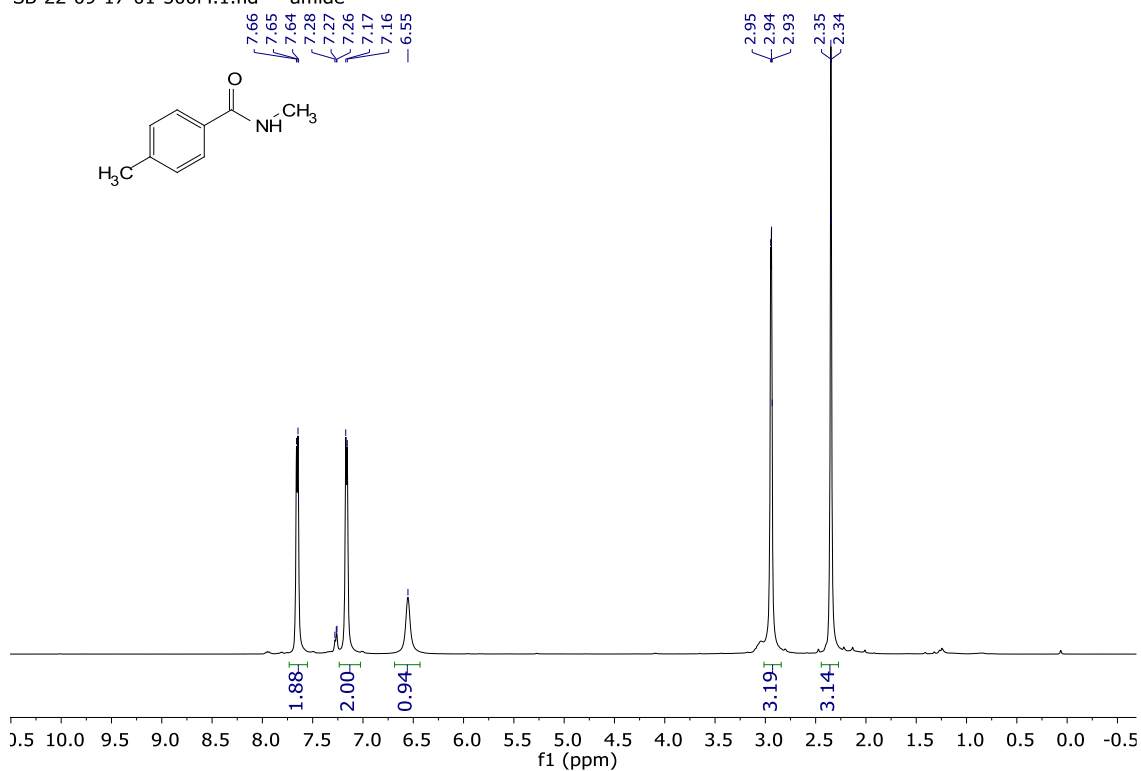Figure S18. <sup>1</sup>H NMR spectra of aromatic amide **4s**

SB-22-09-17-01-500M.2.fid — amide

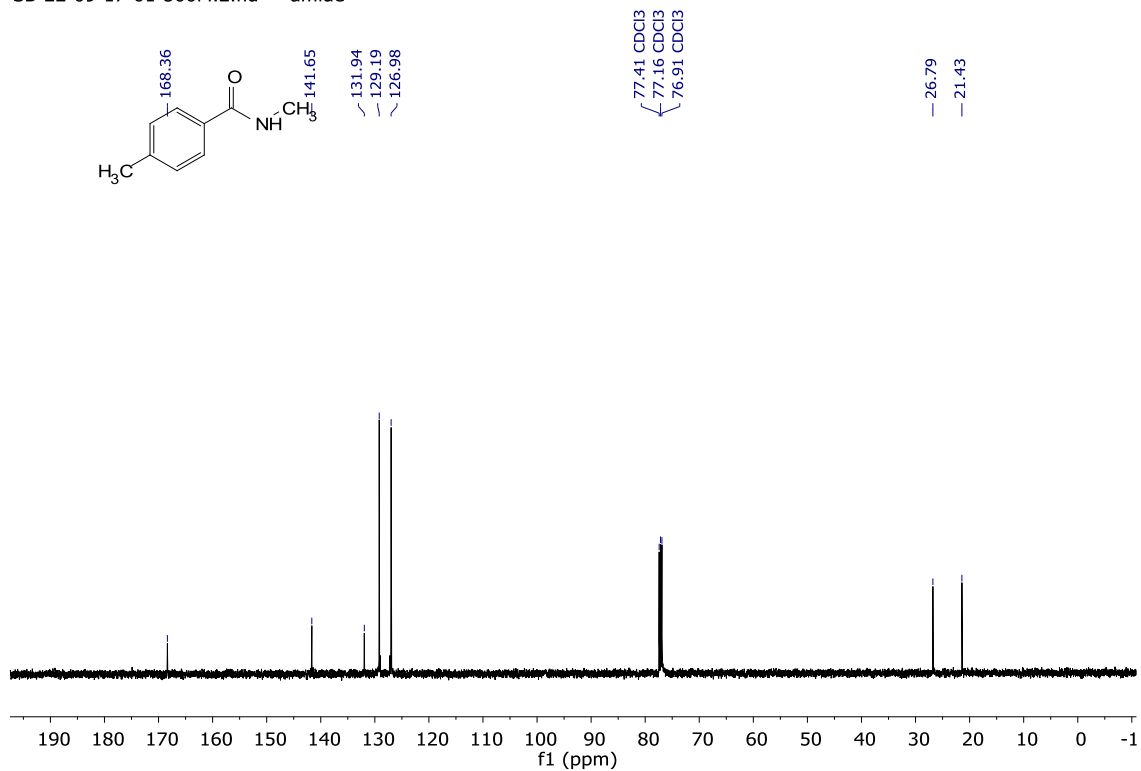Figure S19. <sup>13</sup>C NMR spectra of aromatic amide **4s**

## SUPPORTING INFORMATION

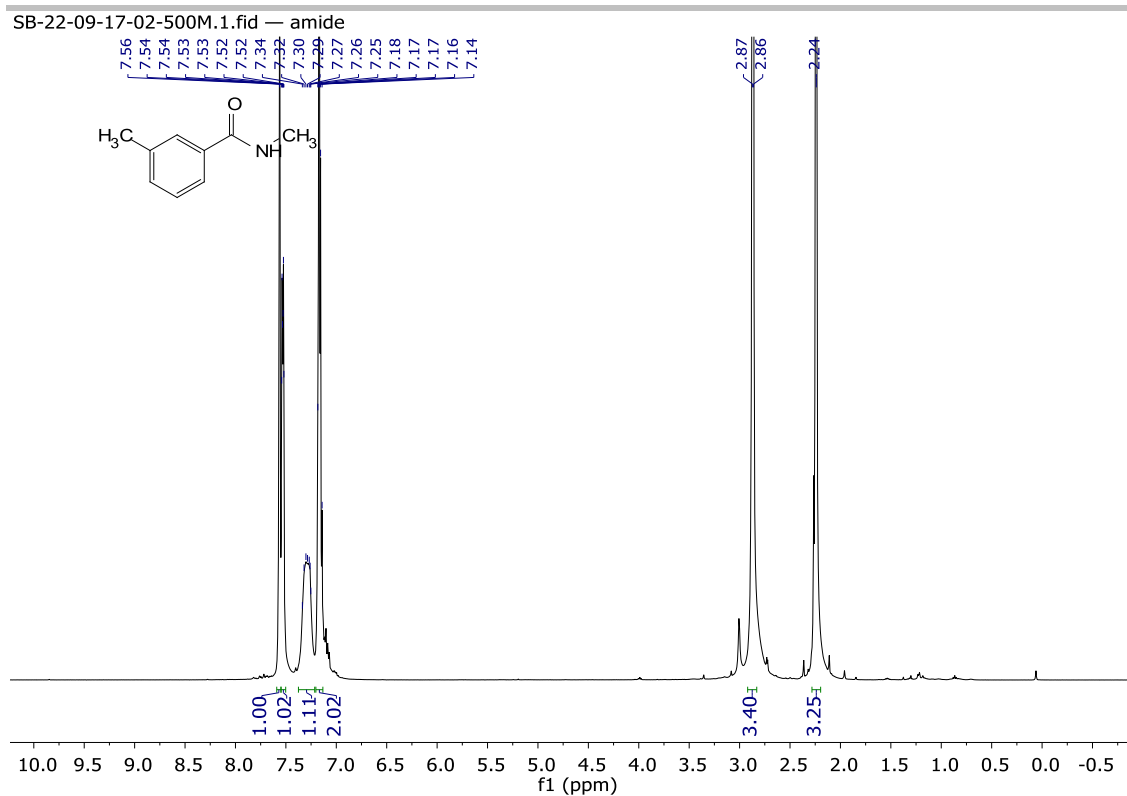Figure S20.  $^1\text{H}$  NMR spectra of aromatic amide **5s**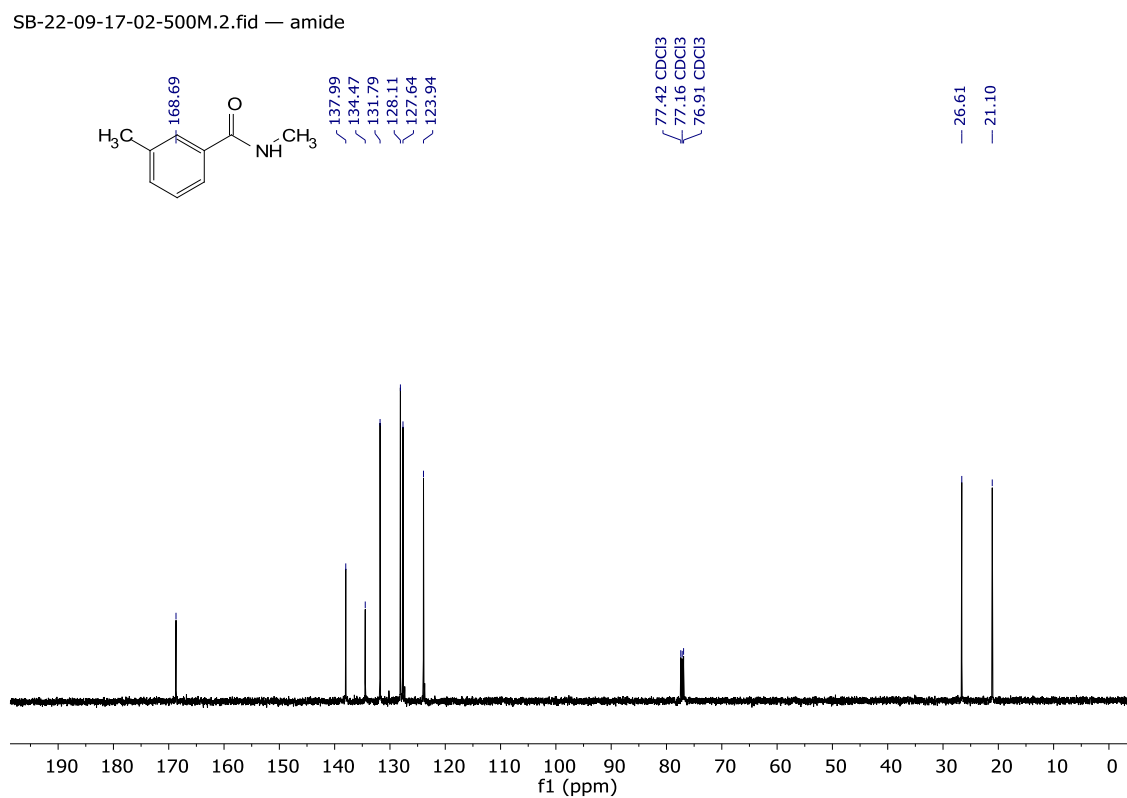Figure S21.  $^{13}\text{C}$  NMR spectra of aromatic amide **5s**

## SUPPORTING INFORMATION

SB-07-09-17-02.1.fid — benzamide

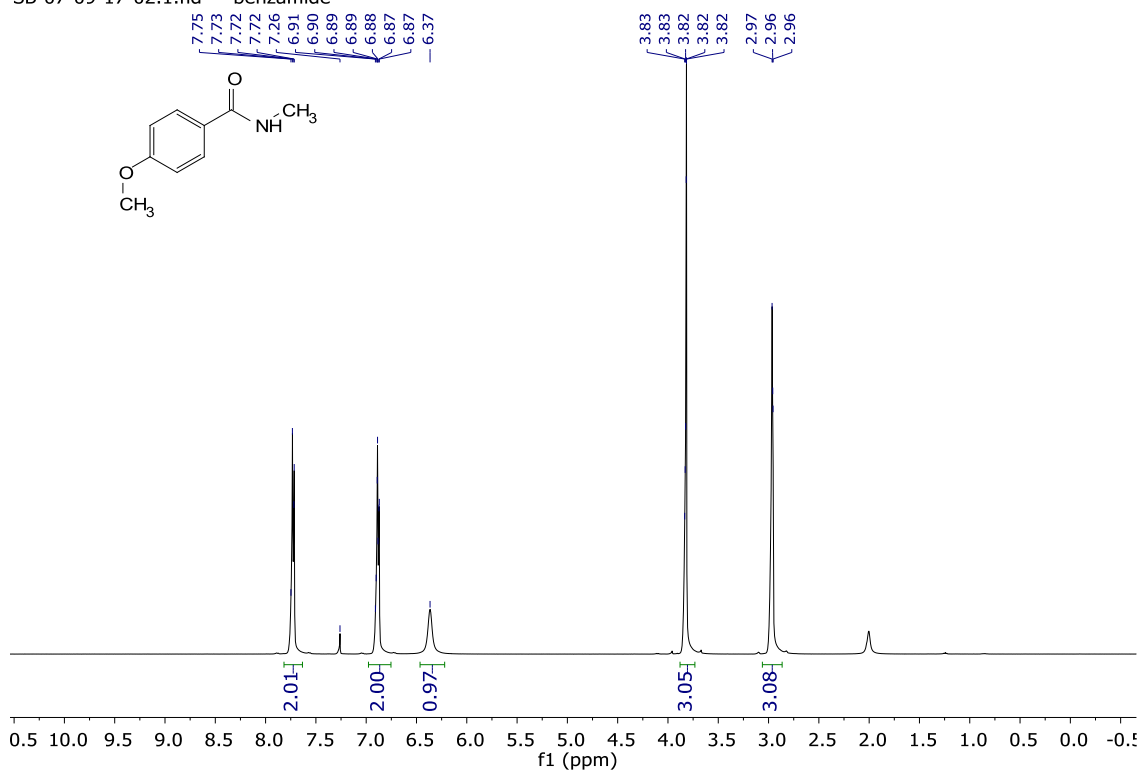Figure S22. <sup>1</sup>H NMR spectra of aromatic amide **6s**

SB-07-09-17-02.3.fid — benzamide

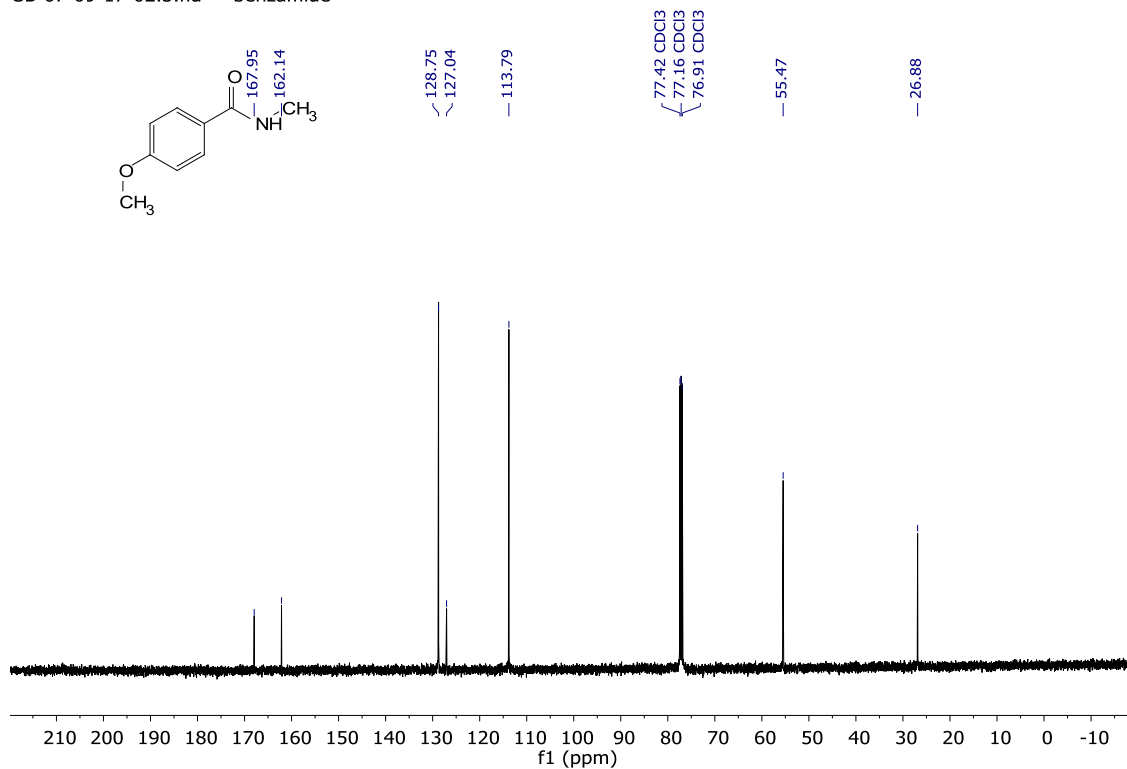Figure S23. <sup>13</sup>C NMR spectra of aromatic amide **6s**

## SUPPORTING INFORMATION

SB-06-09-17-01.2.fid — benzamide

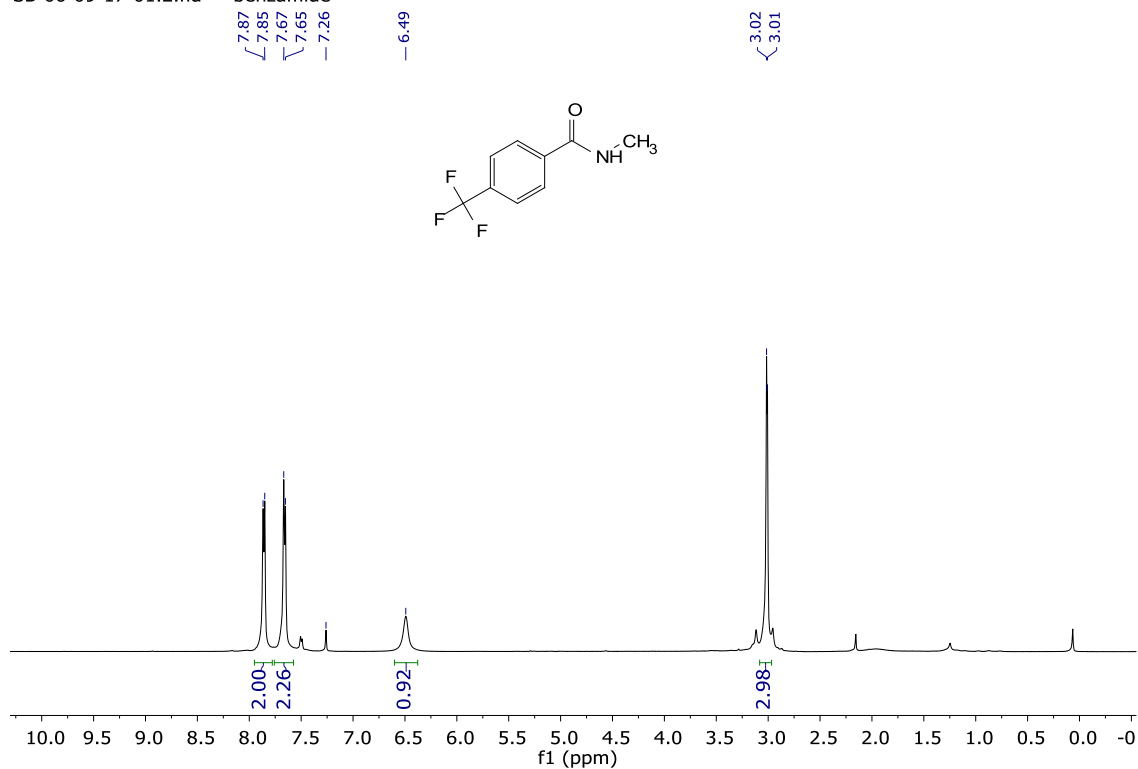Figure S24. <sup>1</sup>H NMR spectra of aromatic amide **7s**

SB-06-09-17-01.1.fid — benzamide

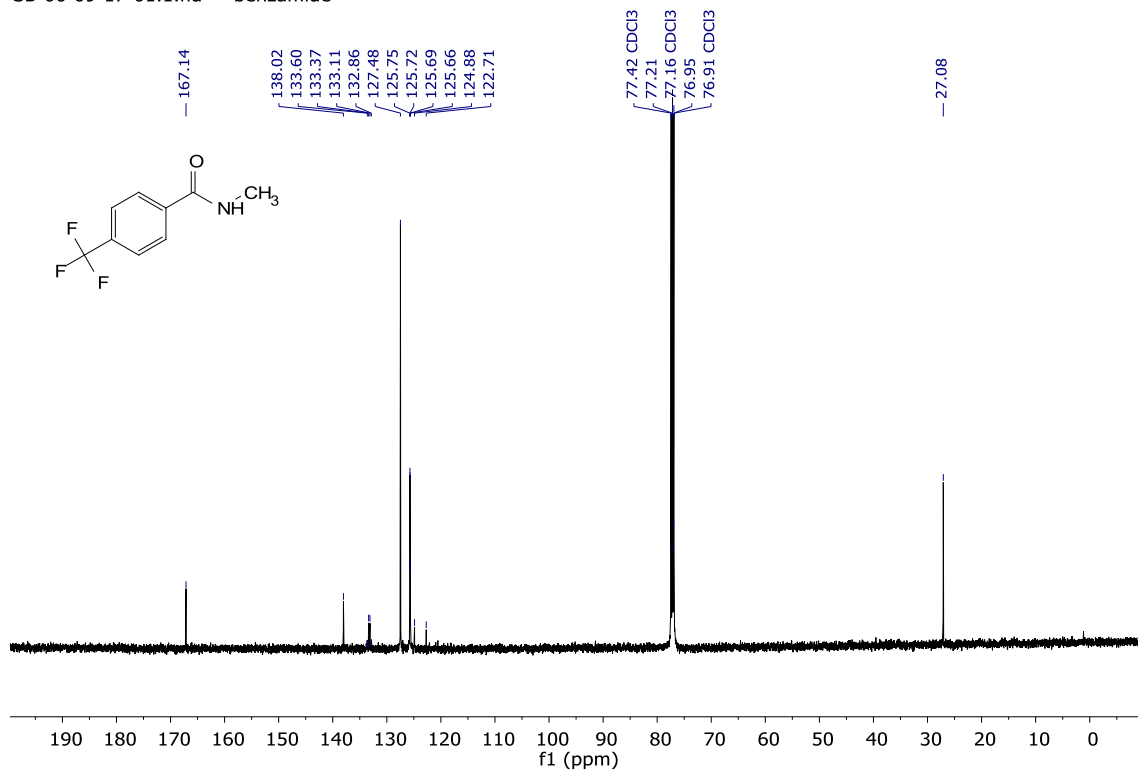Figure S25. <sup>13</sup>C NMR spectra of aromatic amide **7s**

## SUPPORTING INFORMATION

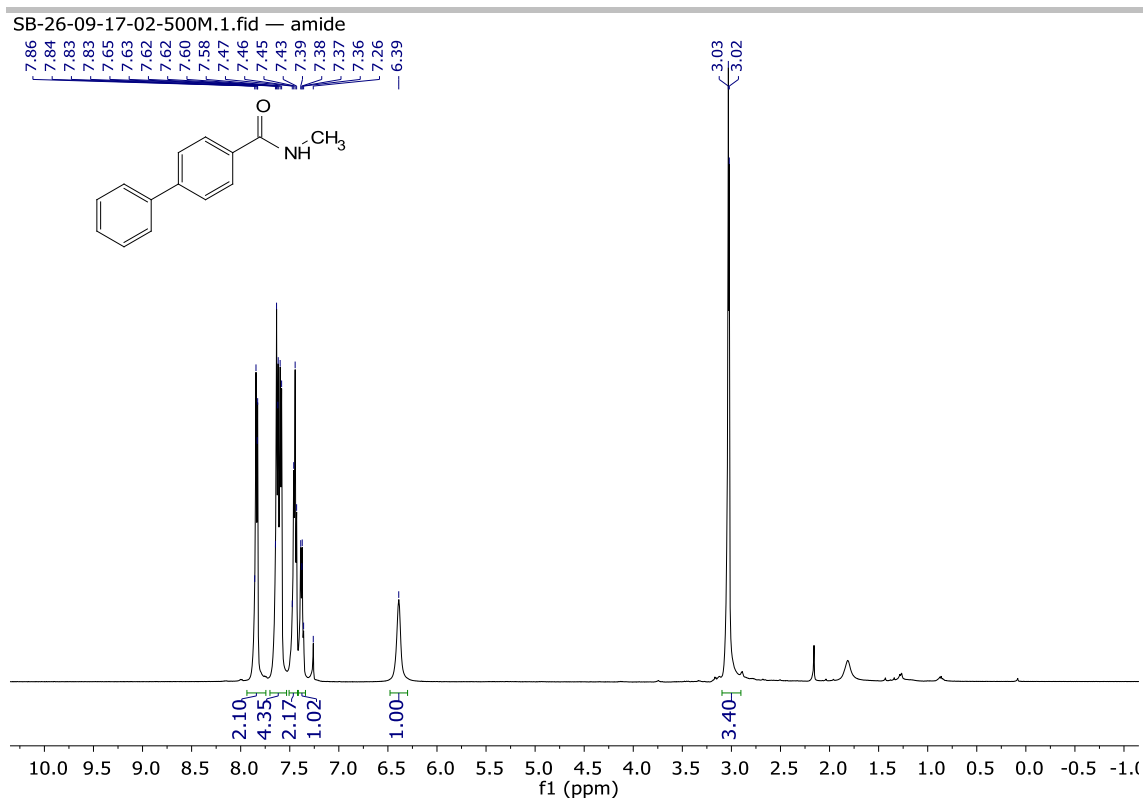Figure S26.  $^1\text{H}$  NMR spectra of aromatic amide **8s**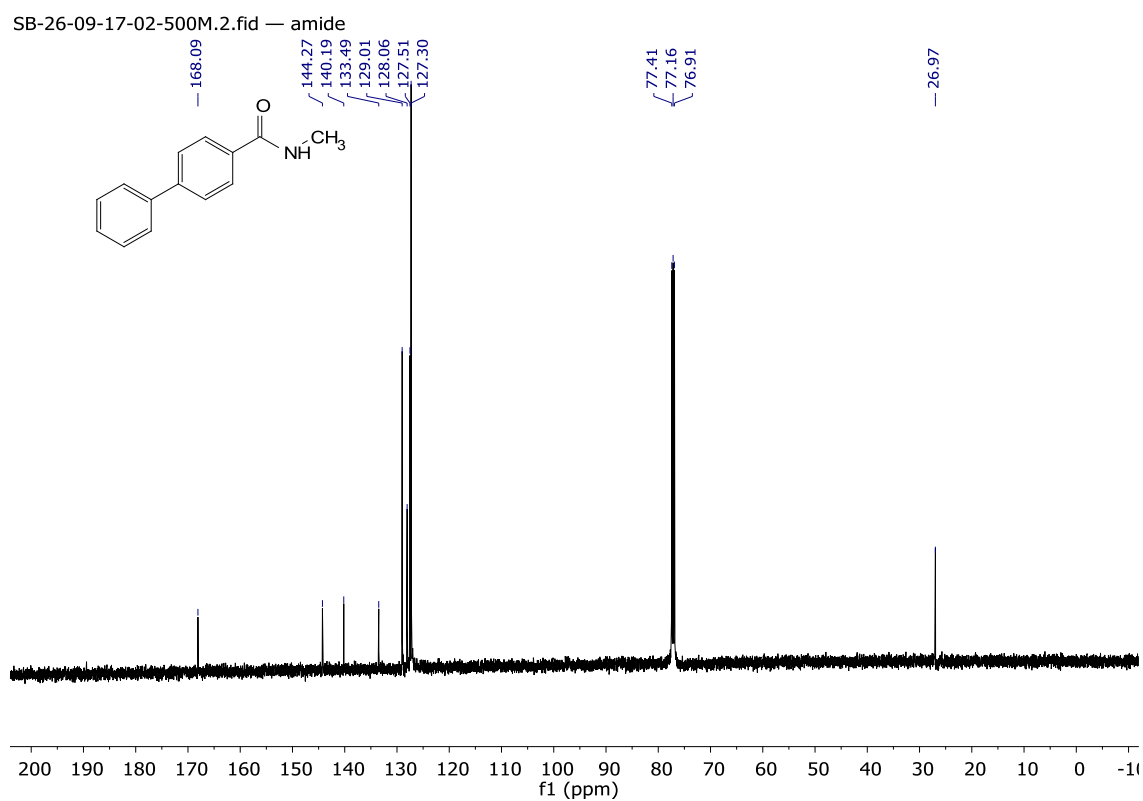Figure S27.  $^{13}\text{C}$  NMR spectra of aromatic amide **8s**

## SUPPORTING INFORMATION

SB-12-09-17-02.1.fid — benzamide

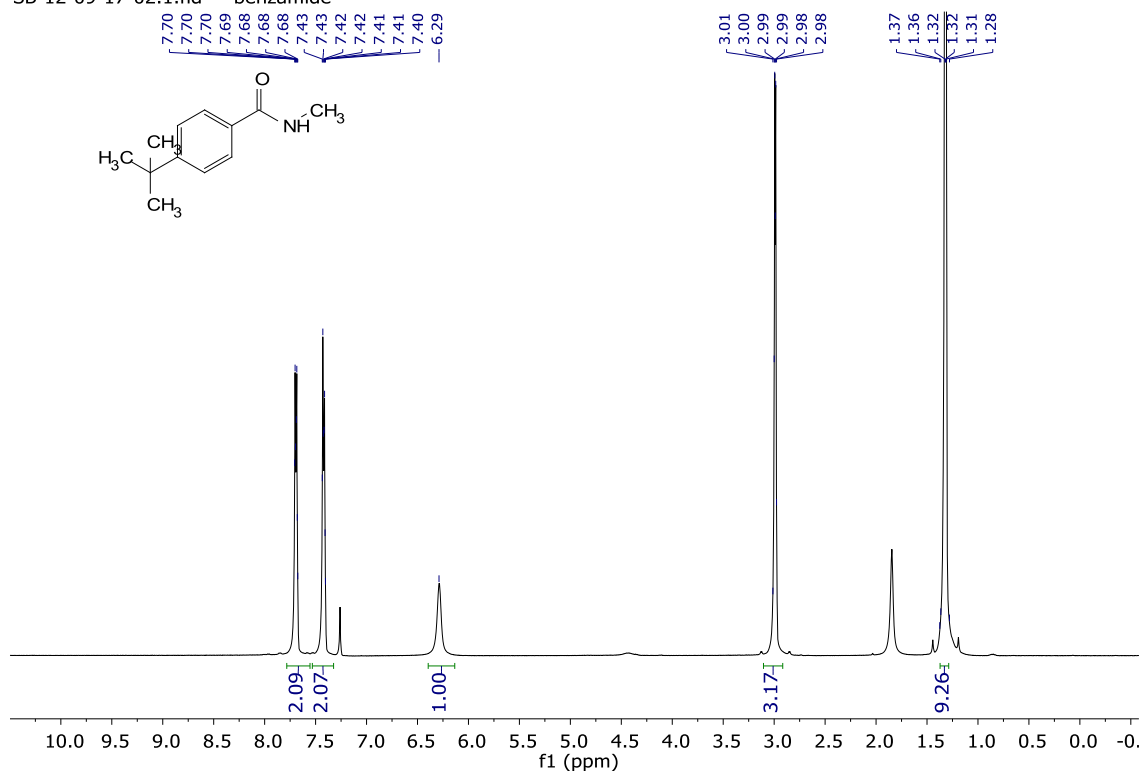Figure S28. <sup>1</sup>H NMR spectra of aromatic amide **9s**

SB-12-09-17-02.2.fid — benzamide

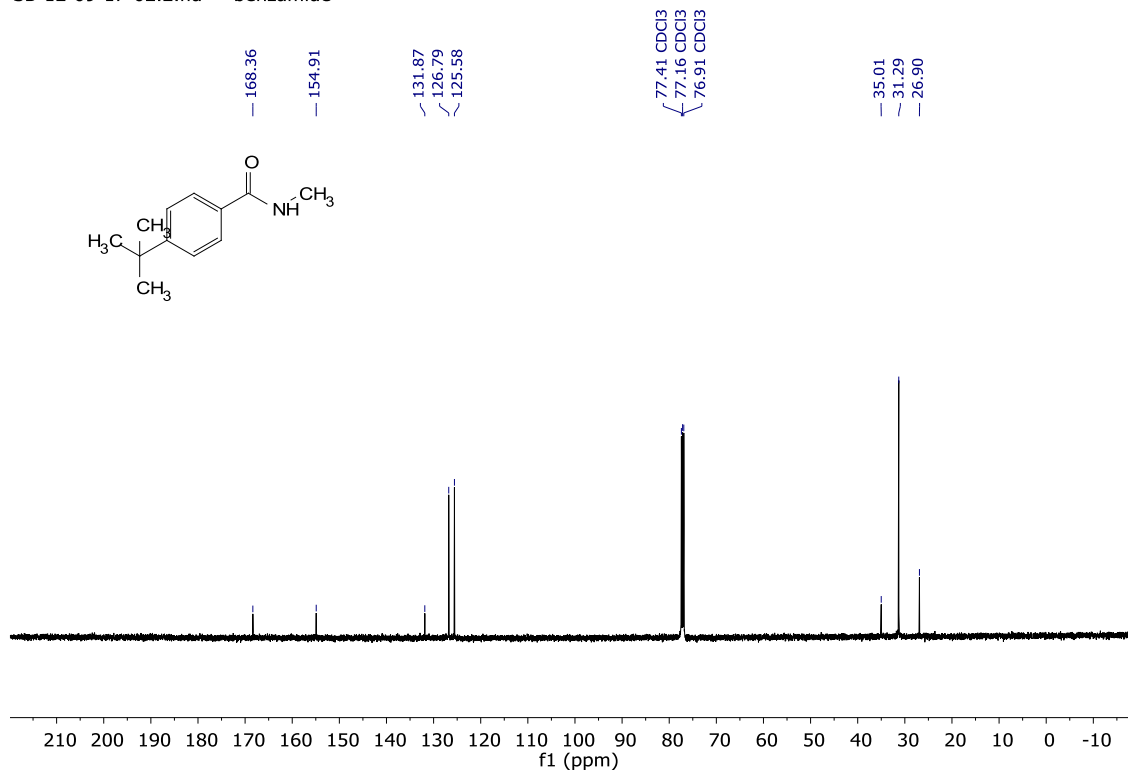Figure S29. <sup>13</sup>C NMR spectra of aromatic amide **9s**



## SUPPORTING INFORMATION

SB-22-09-17-03-500M.1.fid — amide

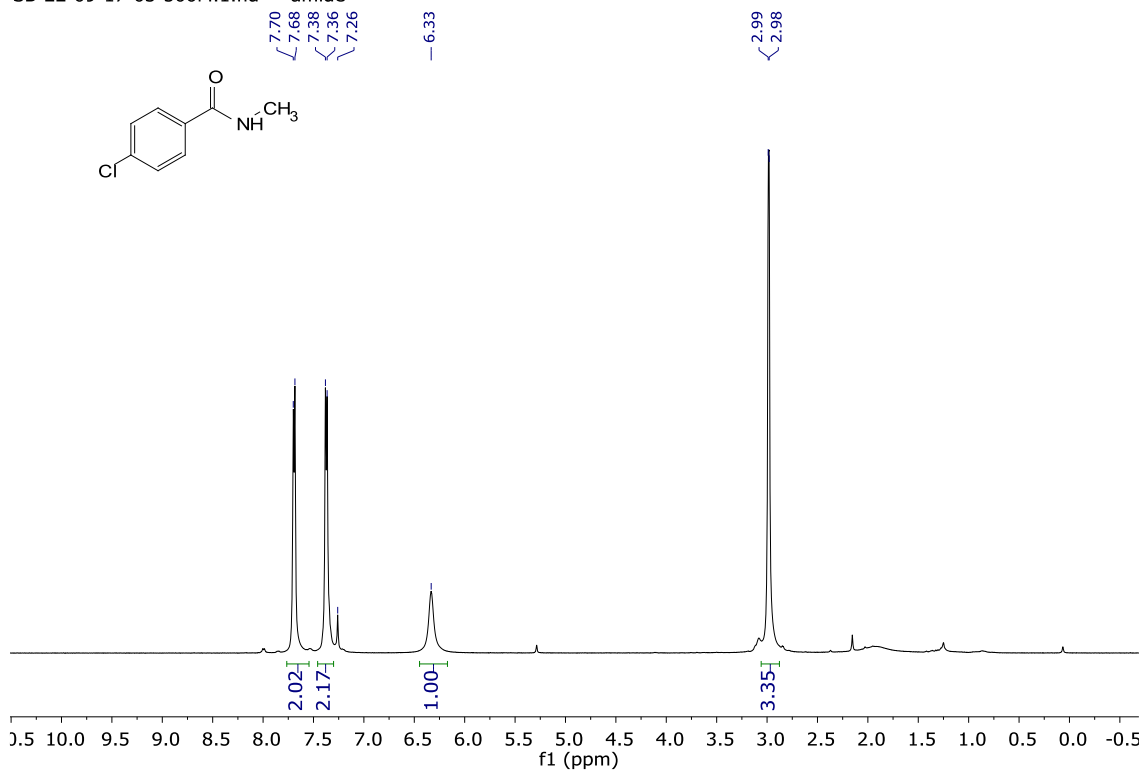Figure S30. <sup>1</sup>H NMR spectra of aromatic amide **10s**

SB-22-09-17-03-500M.2.fid — amide

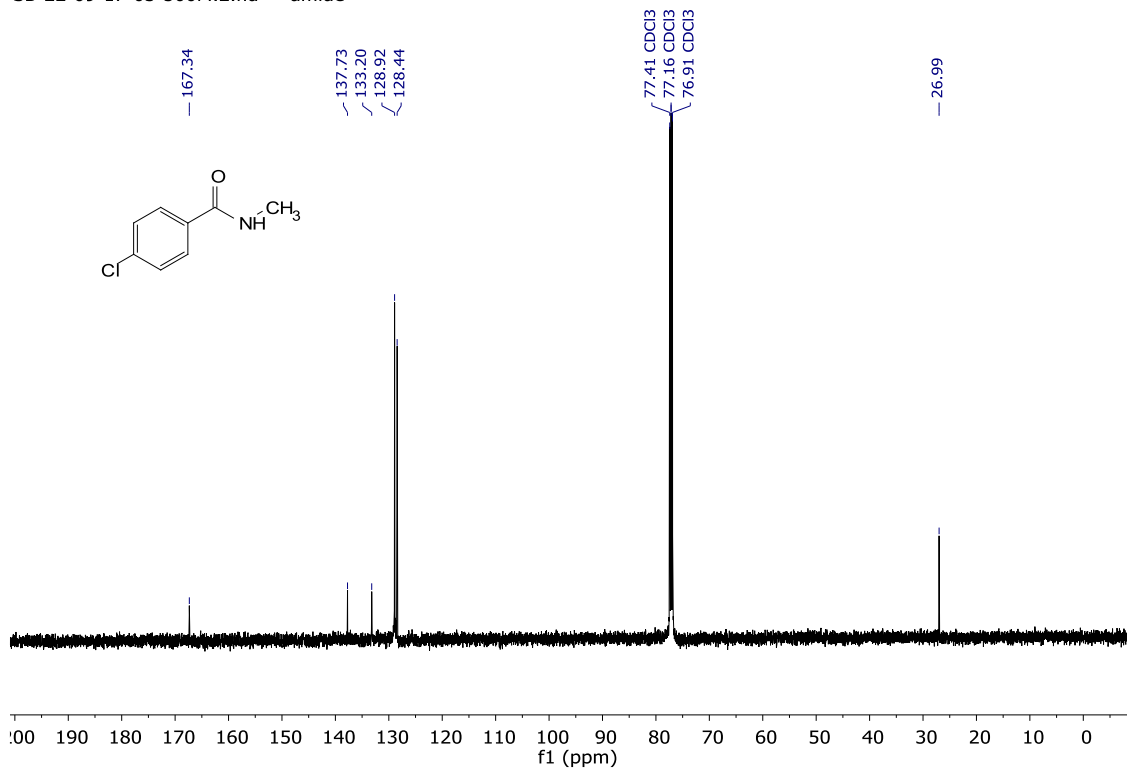Figure S31. <sup>13</sup>C NMR spectra of aromatic amide **10s**

## SUPPORTING INFORMATION

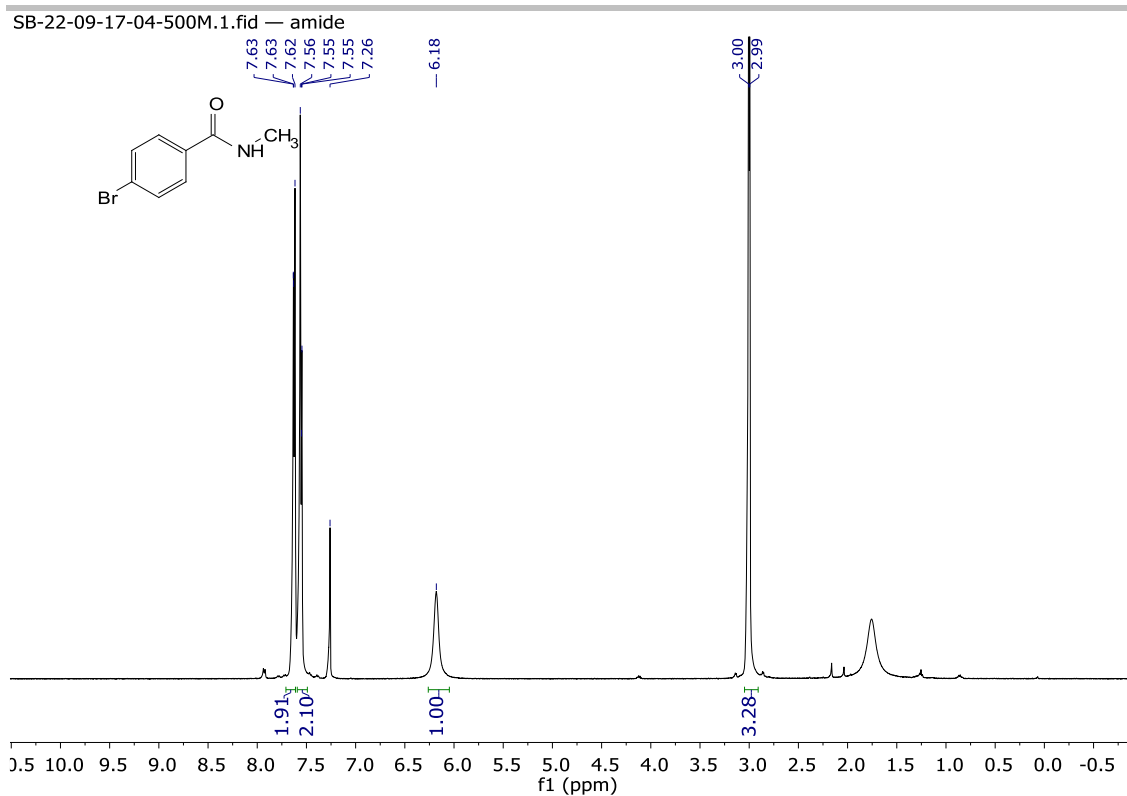Figure S32.  $^1\text{H}$  NMR spectra of aromatic amide **11s**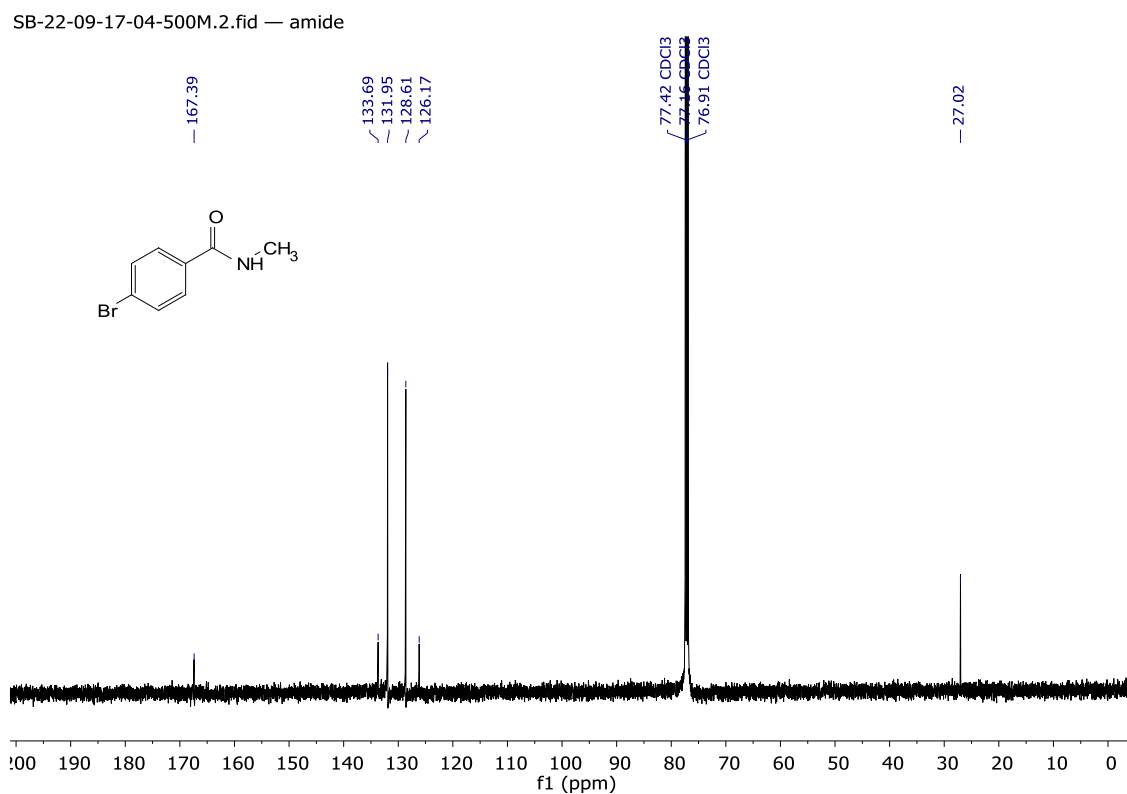Figure S33.  $^{13}\text{C}$  NMR spectra of aromatic amide **11s**

## SUPPORTING INFORMATION

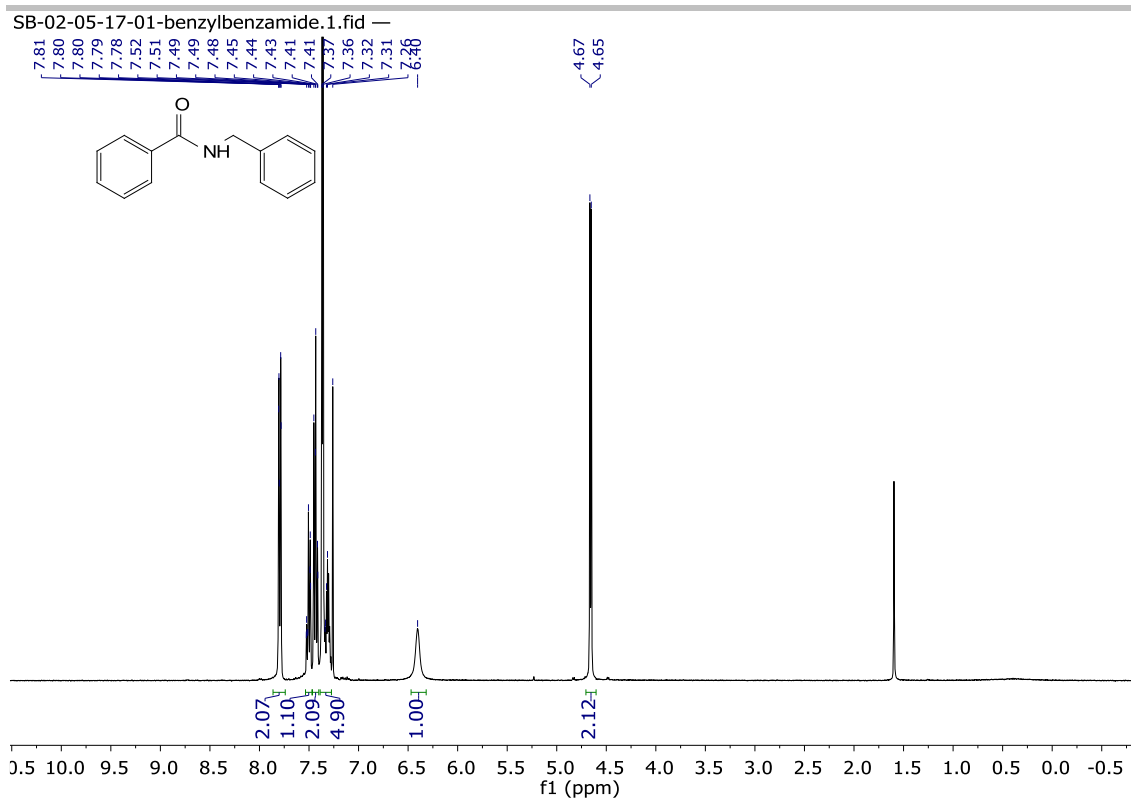Figure S34.  $^1\text{H}$  NMR spectra of aromatic amide **12s**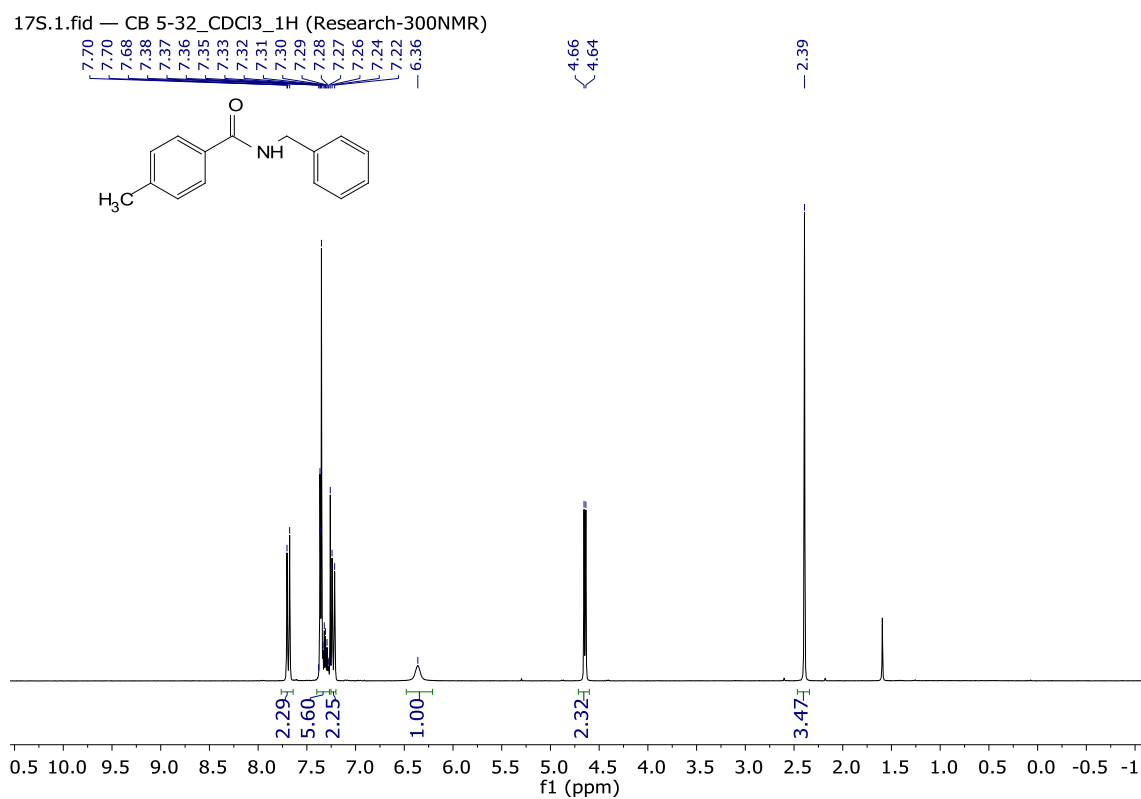Figure S35.  $^1\text{H}$  NMR spectra of aromatic amide **13s**

## SUPPORTING INFORMATION

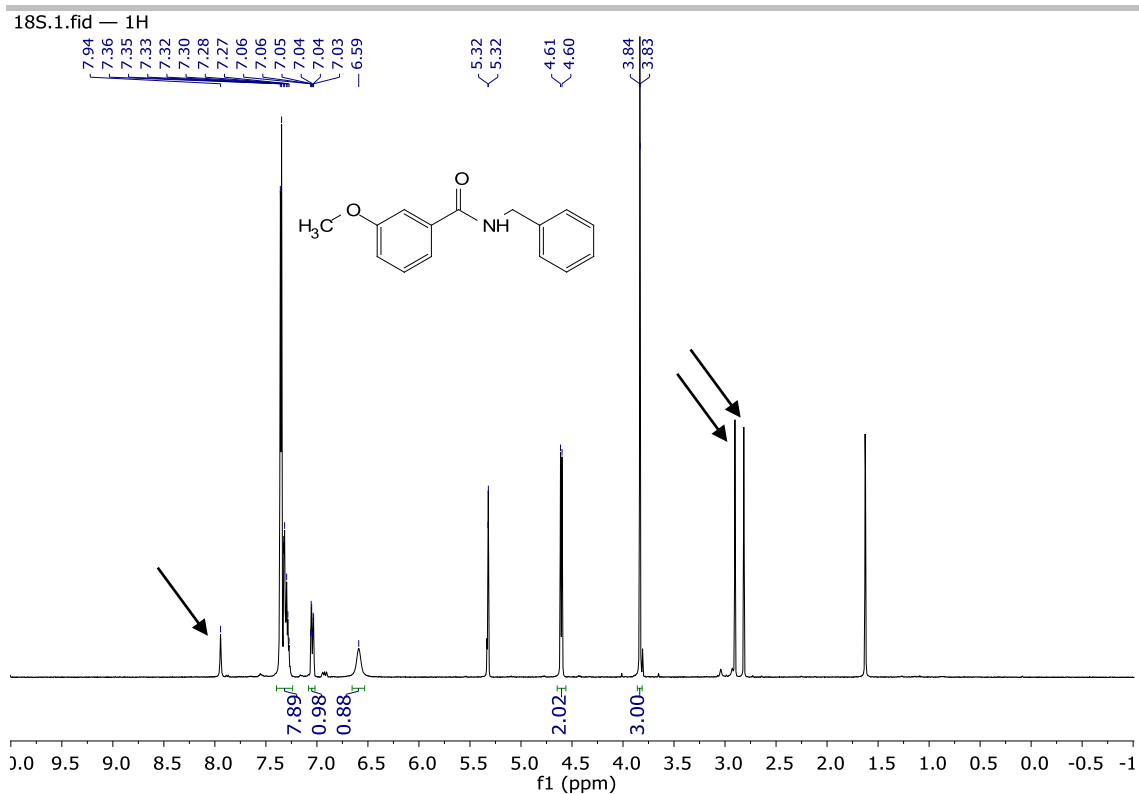Figure S36.  $^1\text{H}$  NMR spectra of aromatic amide **14s** (DMF indicated by arrows)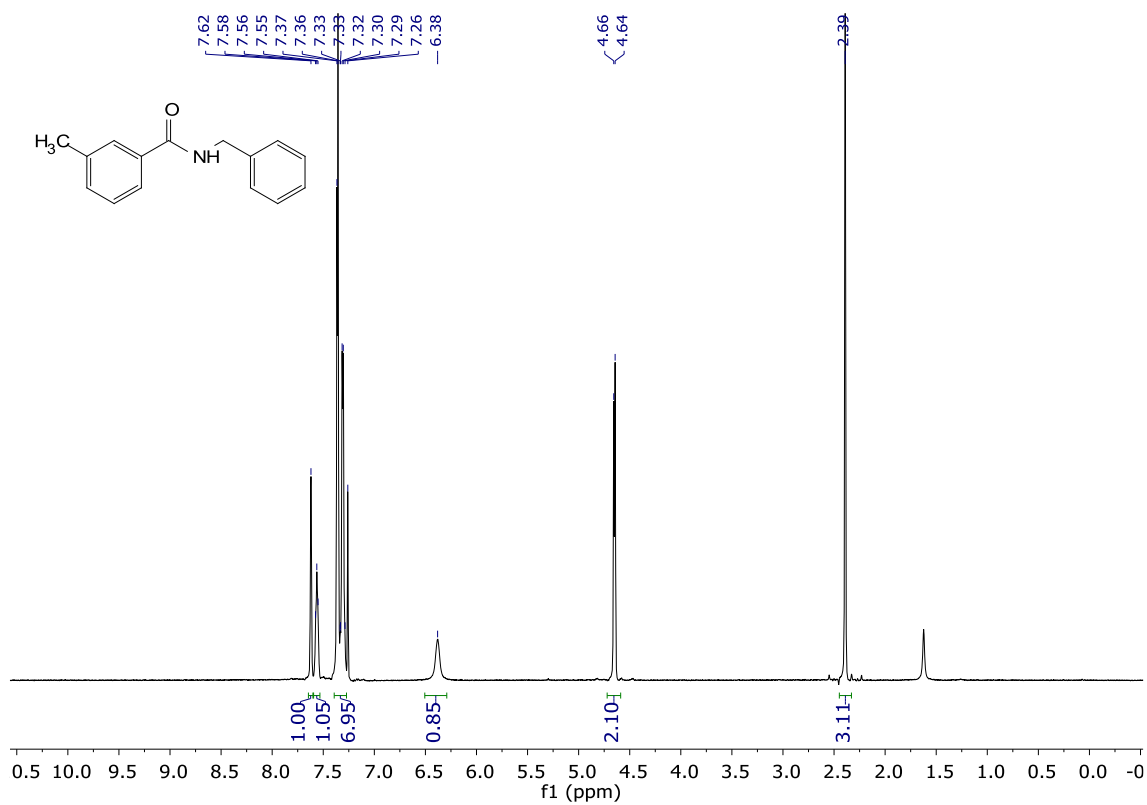Figure S37.  $^1\text{H}$  NMR spectra of aromatic amides **15s**

## SUPPORTING INFORMATION

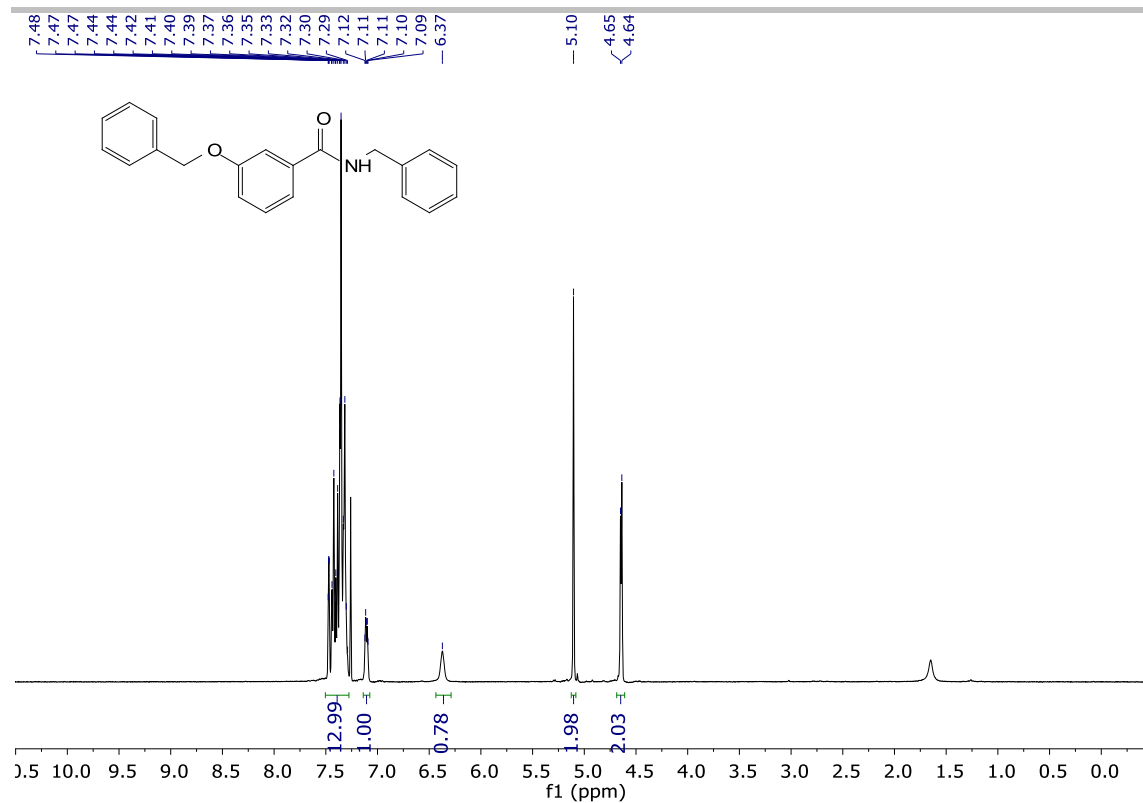Figure S38. <sup>1</sup>H NMR spectra of aromatic amides **16s**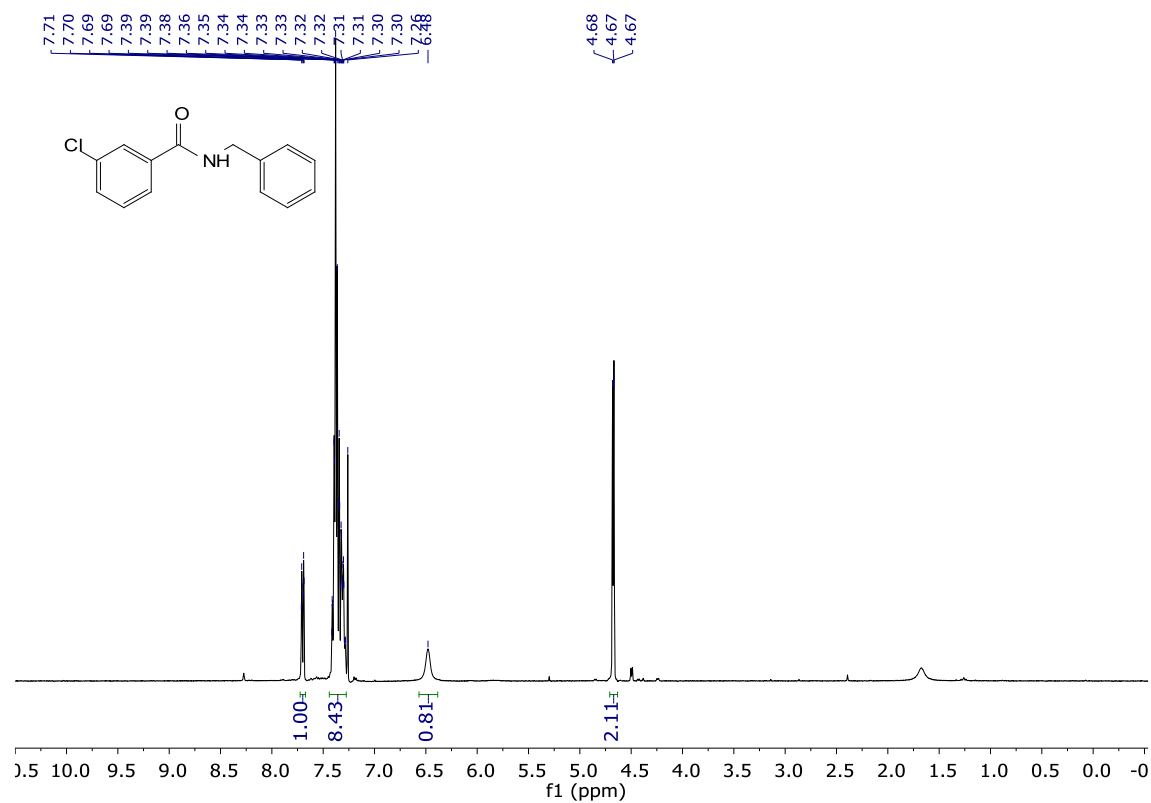Figure S39. <sup>1</sup>H NMR spectra of aromatic amides **17s**

## SUPPORTING INFORMATION

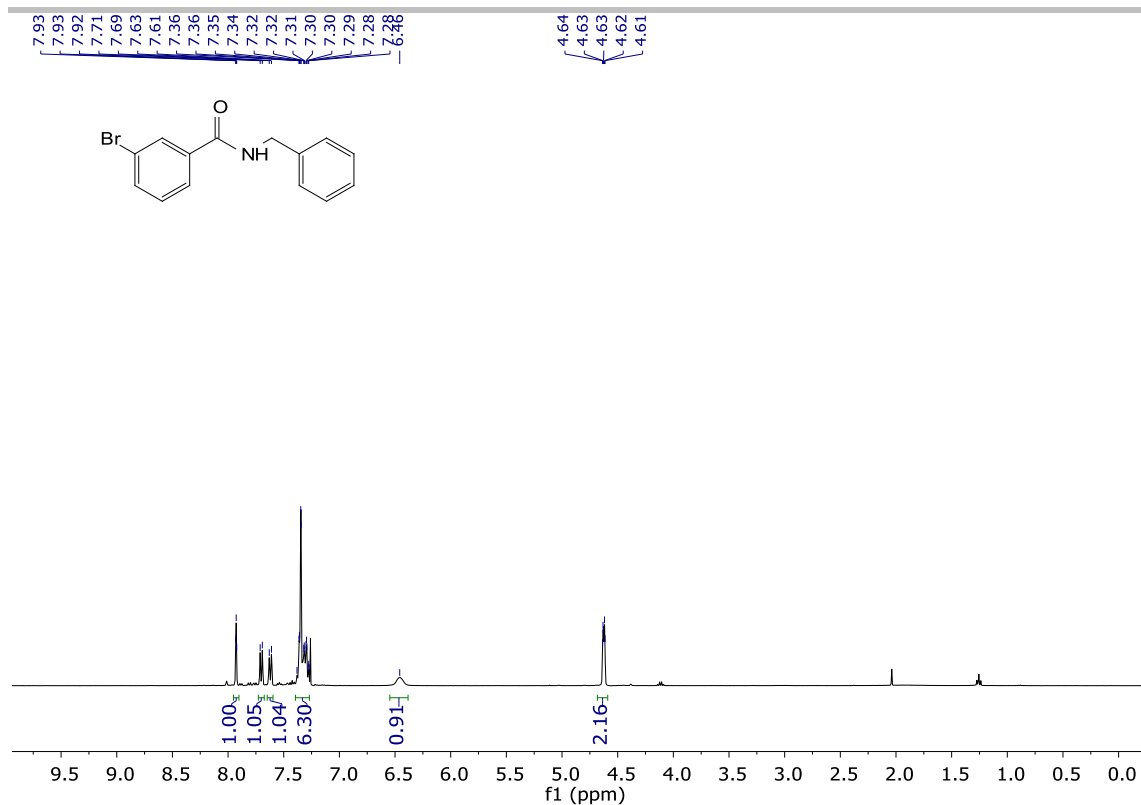Figure S40.  $^1\text{H}$  NMR spectra of aromatic amides **18s**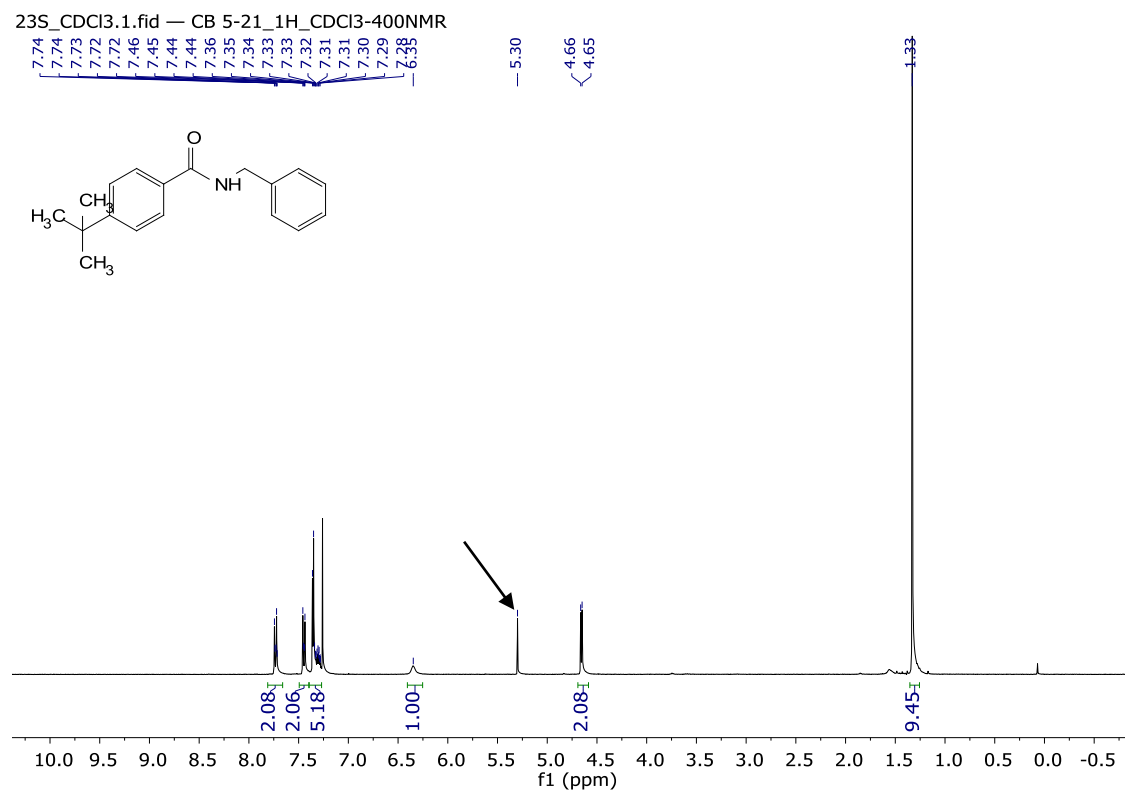Figure S41.  $^1\text{H}$  NMR spectra of aromatic amide **19s** (DCM indicated by arrow)

## SUPPORTING INFORMATION

20S.1.fid — CB 5-31\_CDCl3\_1H (Research-300NMR)

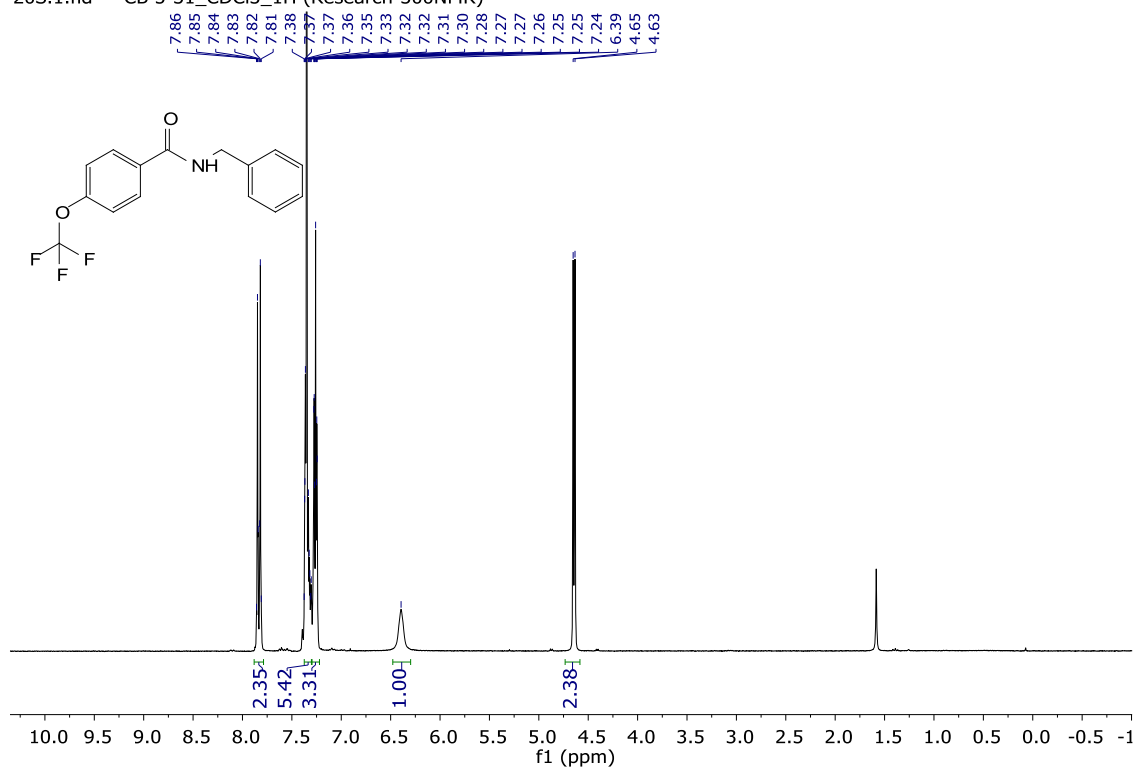Figure S42. <sup>1</sup>H NMR spectra of aromatic amide **20s**

SB-23-8-18-1-chcl3-400M.1.fid — methoxy

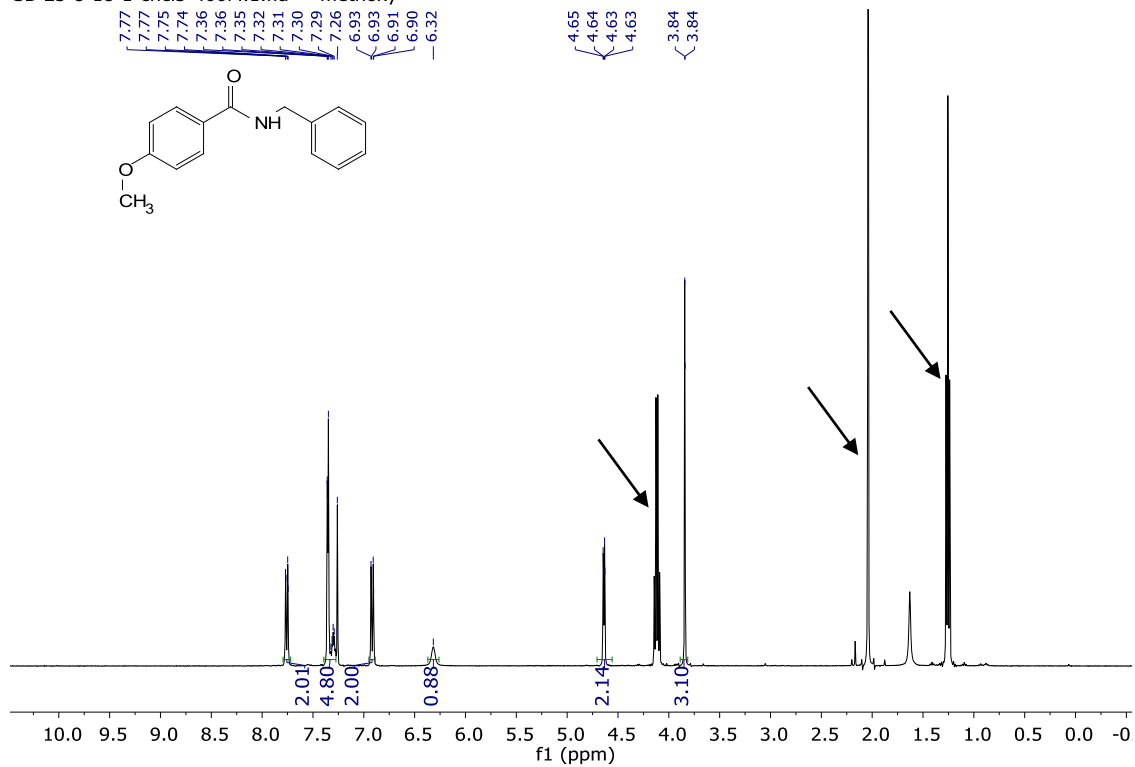Figure S43. <sup>1</sup>H NMR spectra of aromatic amide **21s** (ethyl acetate indicated by arrows)

## SUPPORTING INFORMATION

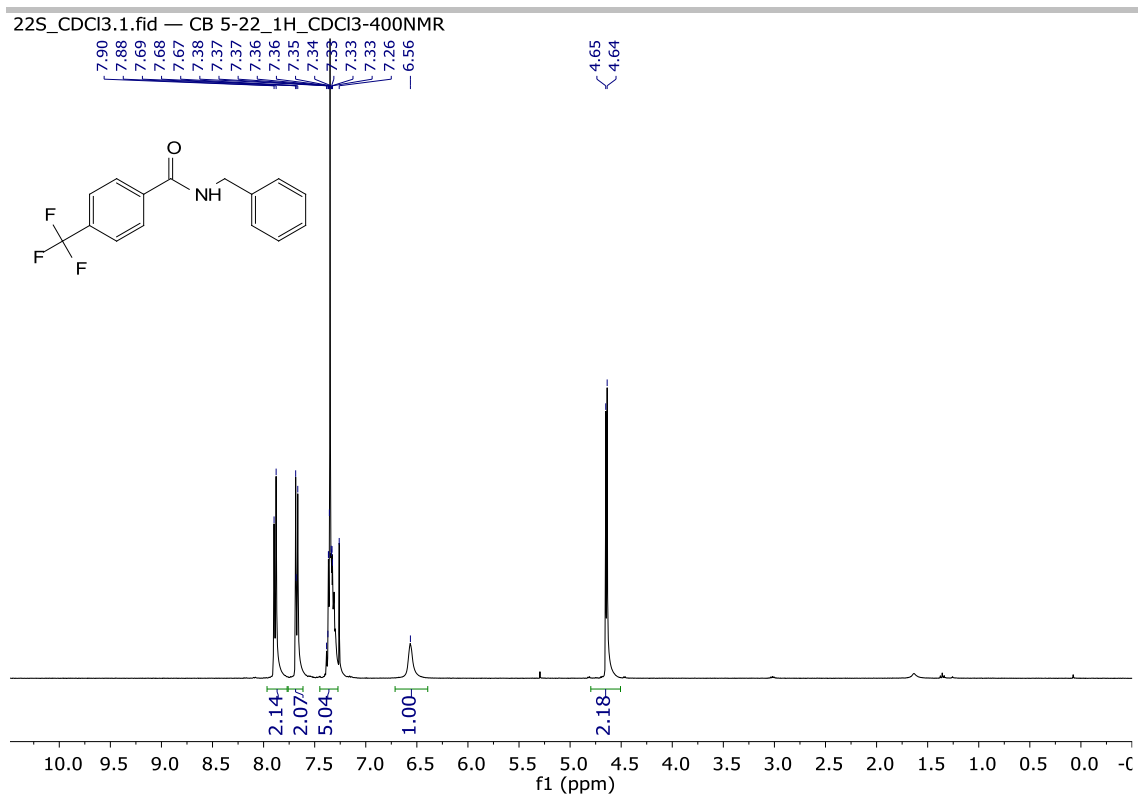Figure S44.  $^1\text{H}$  NMR spectra of aromatic amide **22s**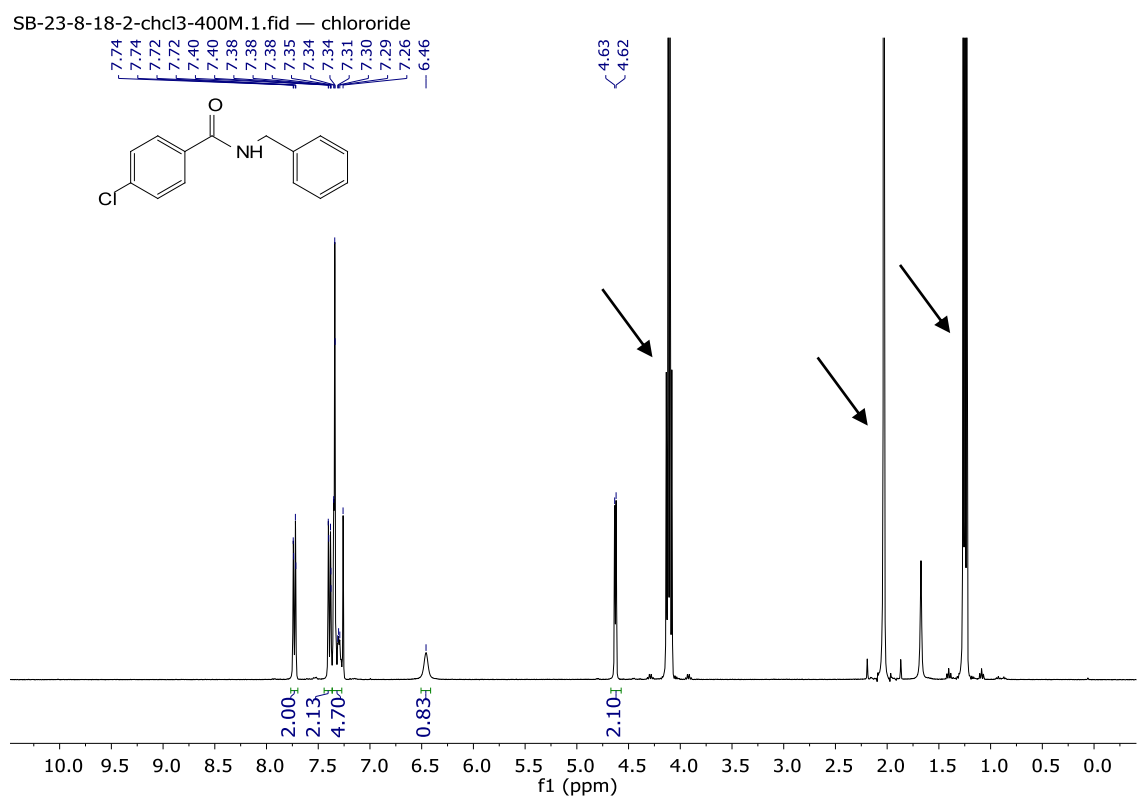Figure S45.  $^1\text{H}$  NMR spectra of aromatic amide **23s** (ethyl acetate indicated by arrows)



## SUPPORTING INFORMATION

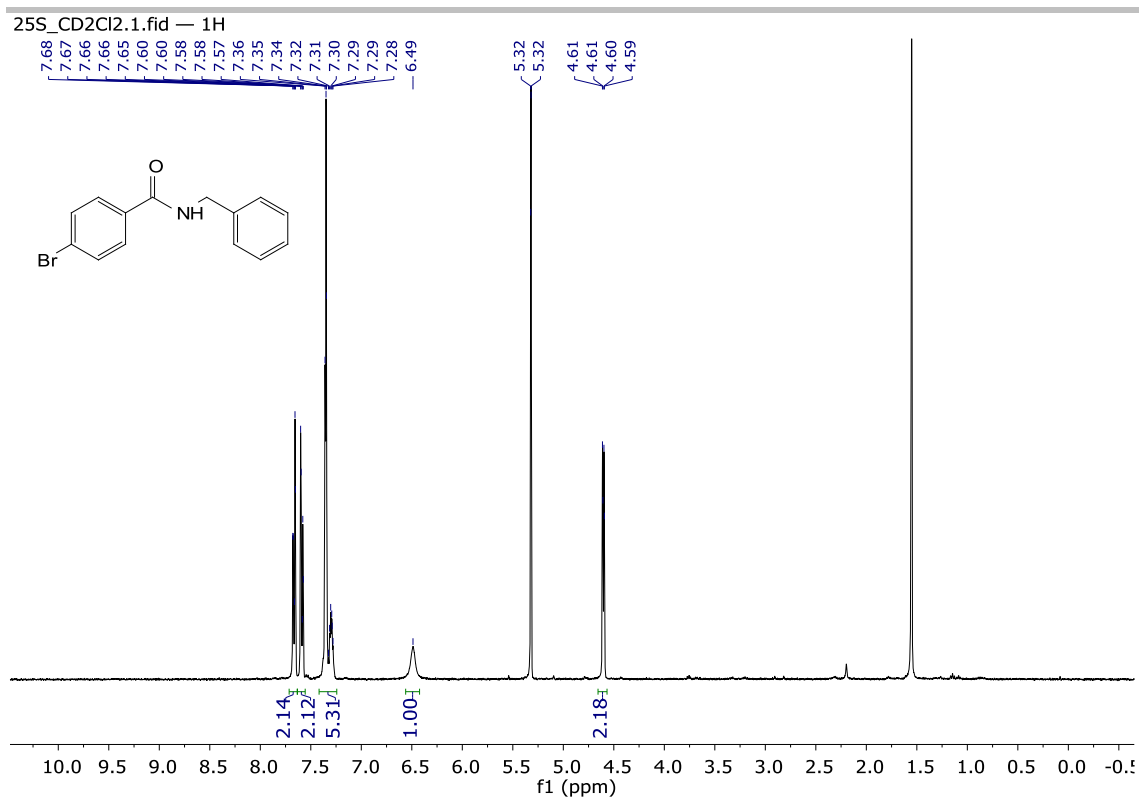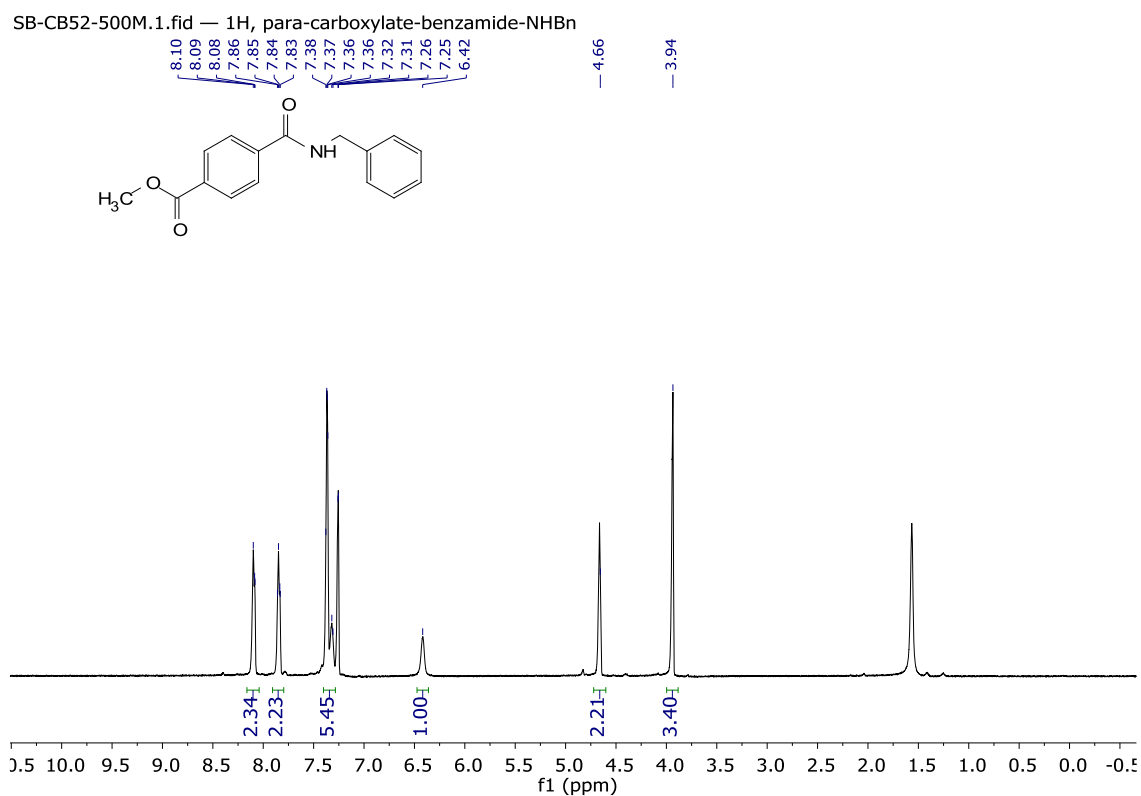

## SUPPORTING INFORMATION

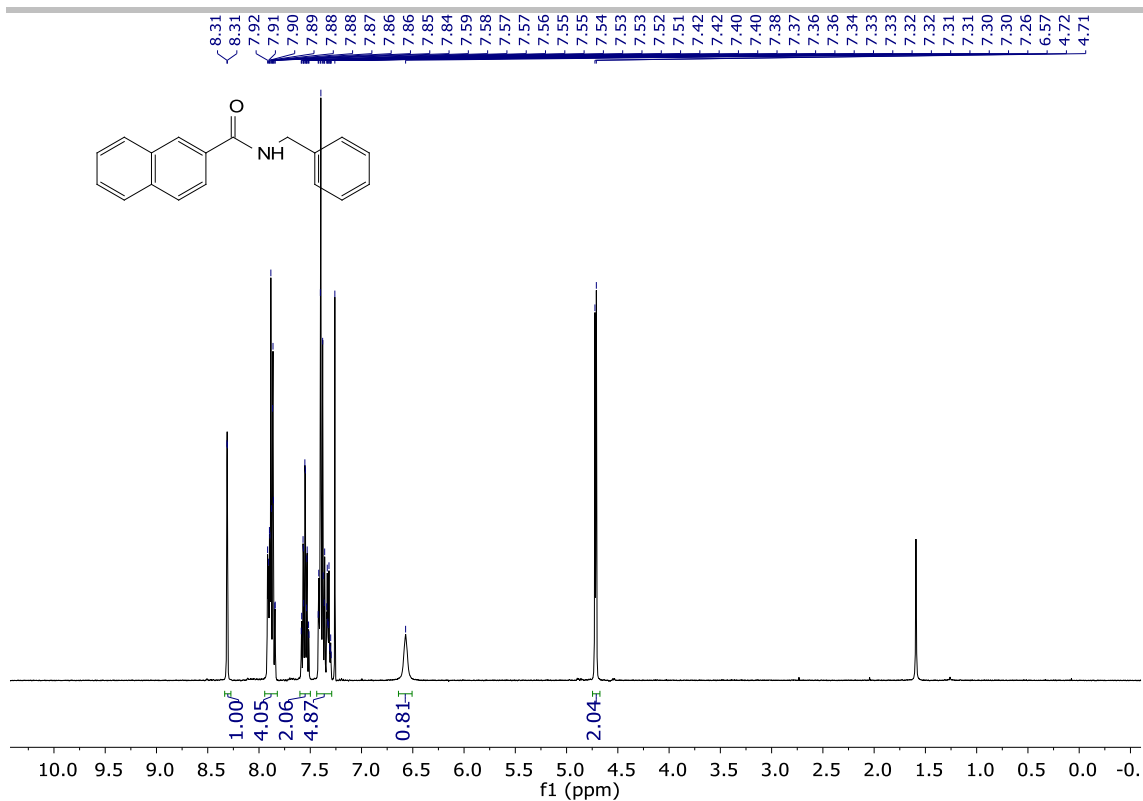Figure S48. <sup>1</sup>H NMR spectra of aromatic amides **26s**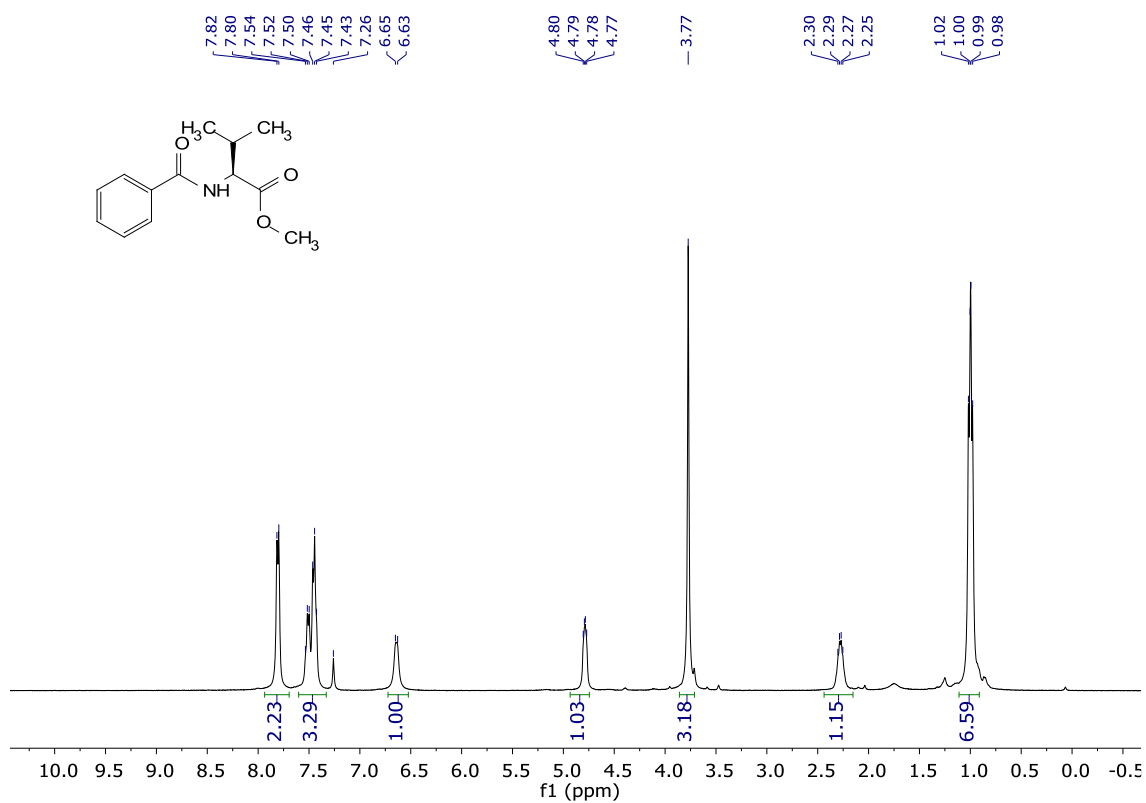Figure S49. <sup>1</sup>H NMR spectra of aromatic amides **27s**

## SUPPORTING INFORMATION

SB-13-02-19-thiophen-amide.1.fid — 1H

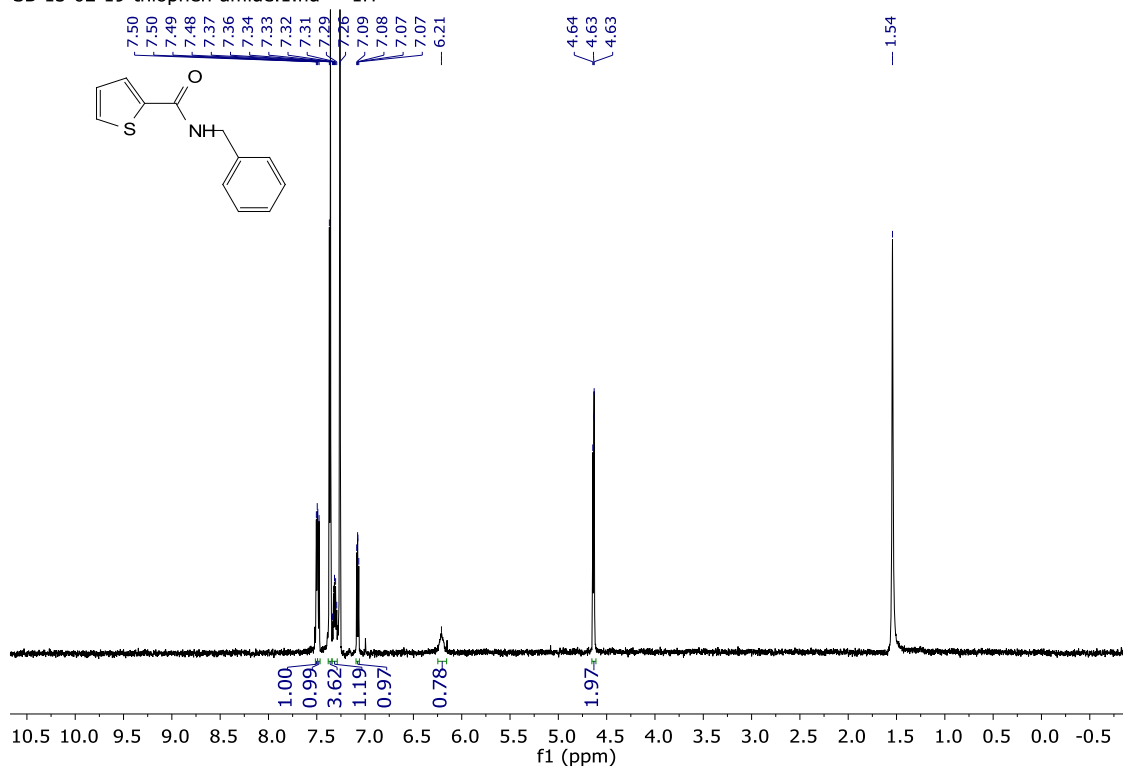Figure S50. <sup>1</sup>H NMR spectra of aromatic amide **28s**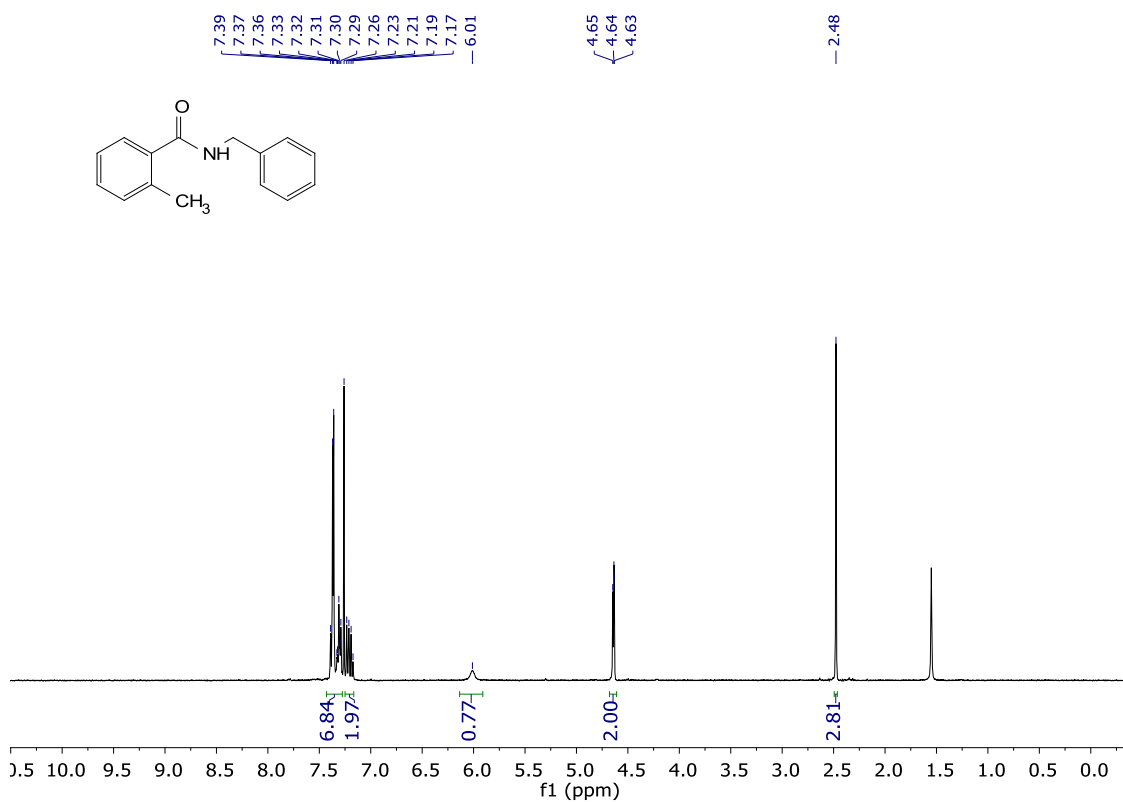Figure S51. <sup>1</sup>H NMR spectra of aromatic amides **29s**

## SUPPORTING INFORMATION

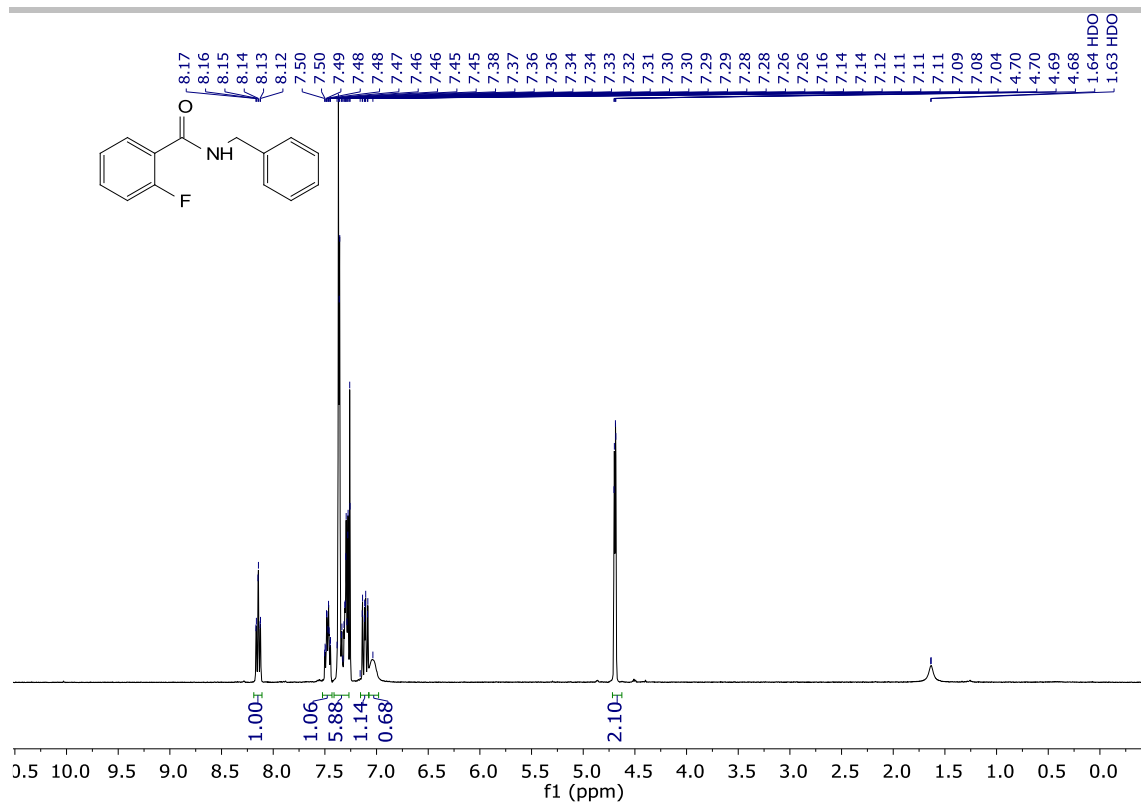Figure S52. <sup>1</sup>H NMR spectra of aromatic amides **30s**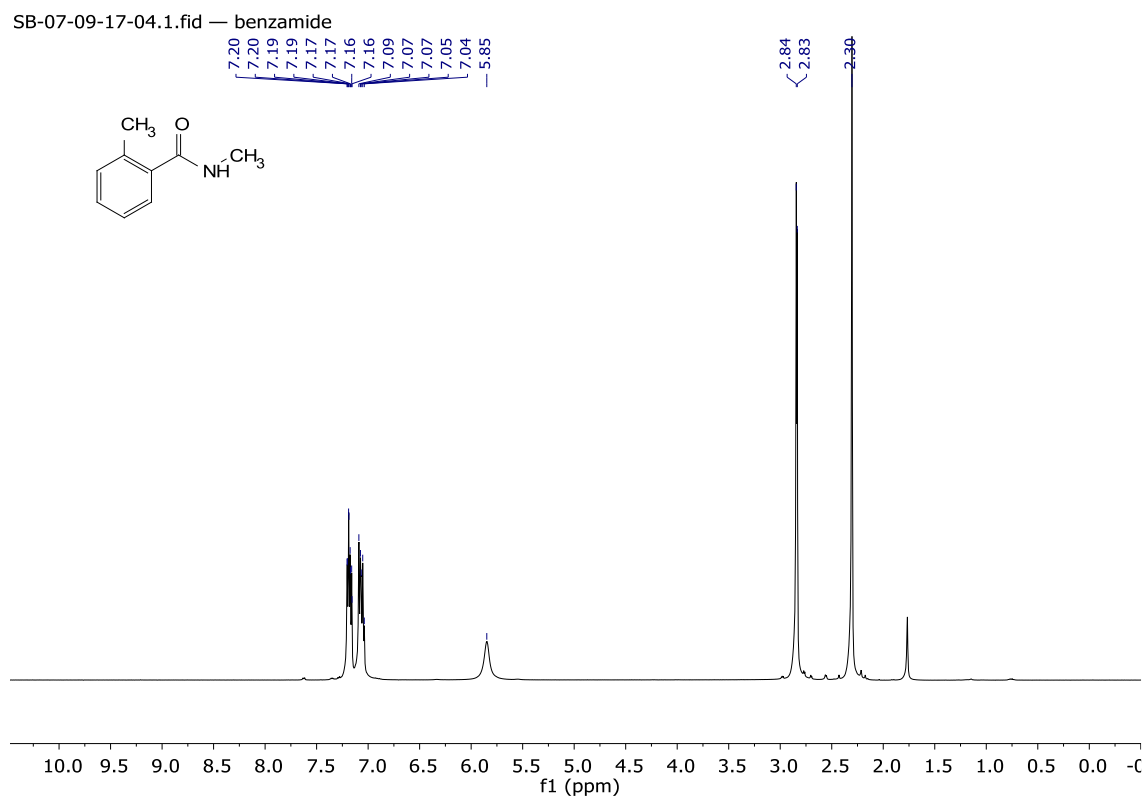Figure S53. <sup>1</sup>H NMR spectra of aromatic amides **31s**

## SUPPORTING INFORMATION

SB-07-09-17-04.2.fid — benzamide

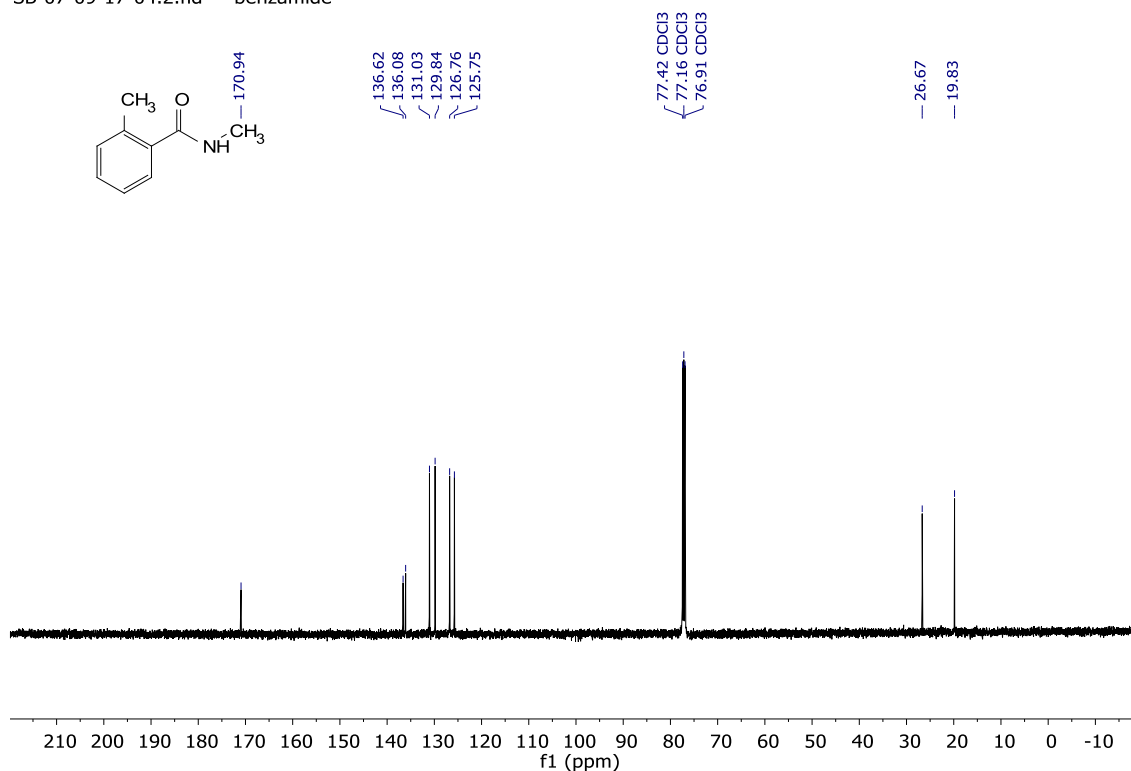Figure S54. <sup>13</sup>C NMR spectra of aromatic amides **31s**

SB-17-05-18-01-03-500M.1.fid — 1H, benzamide, H-bonds

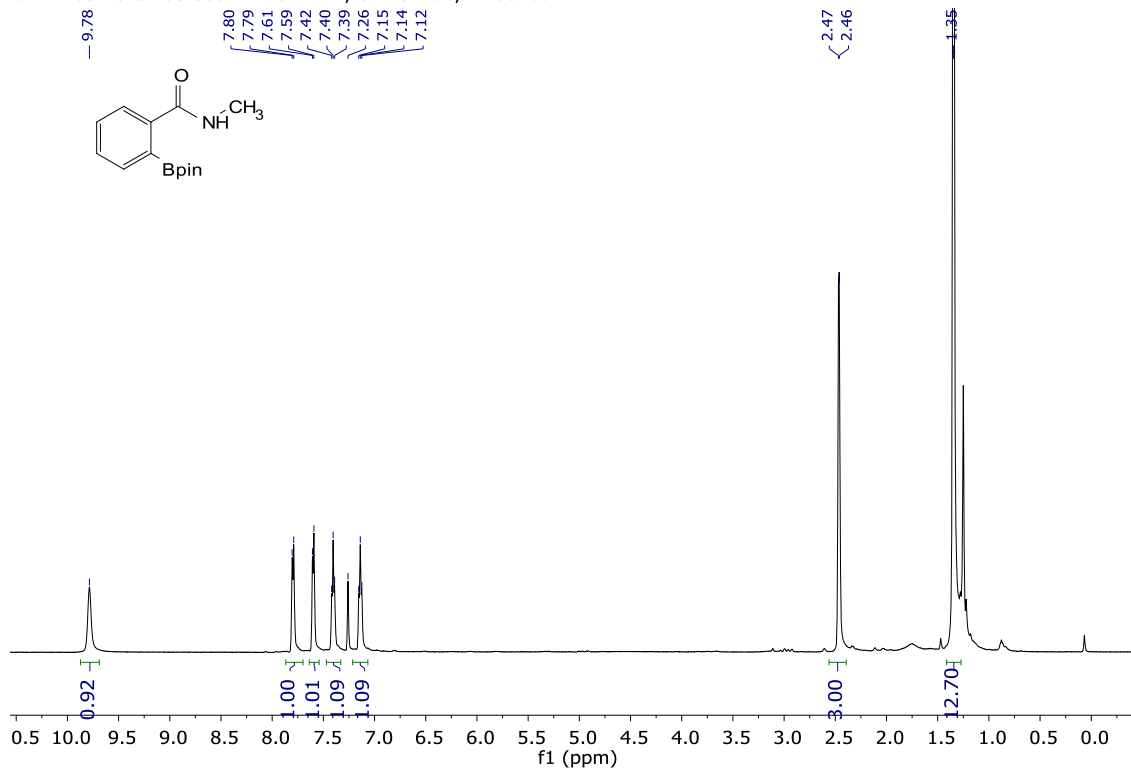Figure S55. <sup>1</sup>H NMR spectra of borylated aromatic amide **1so**

## SUPPORTING INFORMATION

SB-17-05-18-01-03-500M.2.ser —  $^1\text{H}$ , benzamide, H-bonds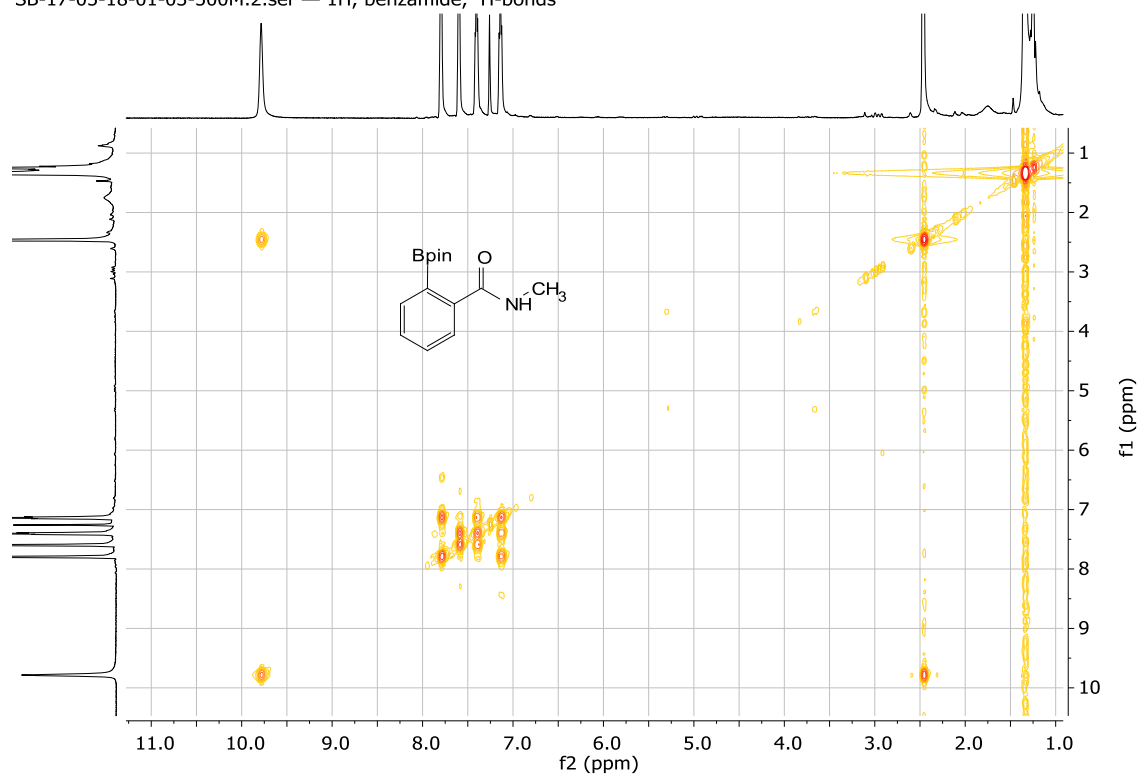Figure S56.  $^1\text{H}$ - $^1\text{H}$  COSY NMR spectra of borylated aromatic amide **1so**SB-17-05-18-01-03-500M.3.ser —  $^1\text{H}$ , benzamide, H-bonds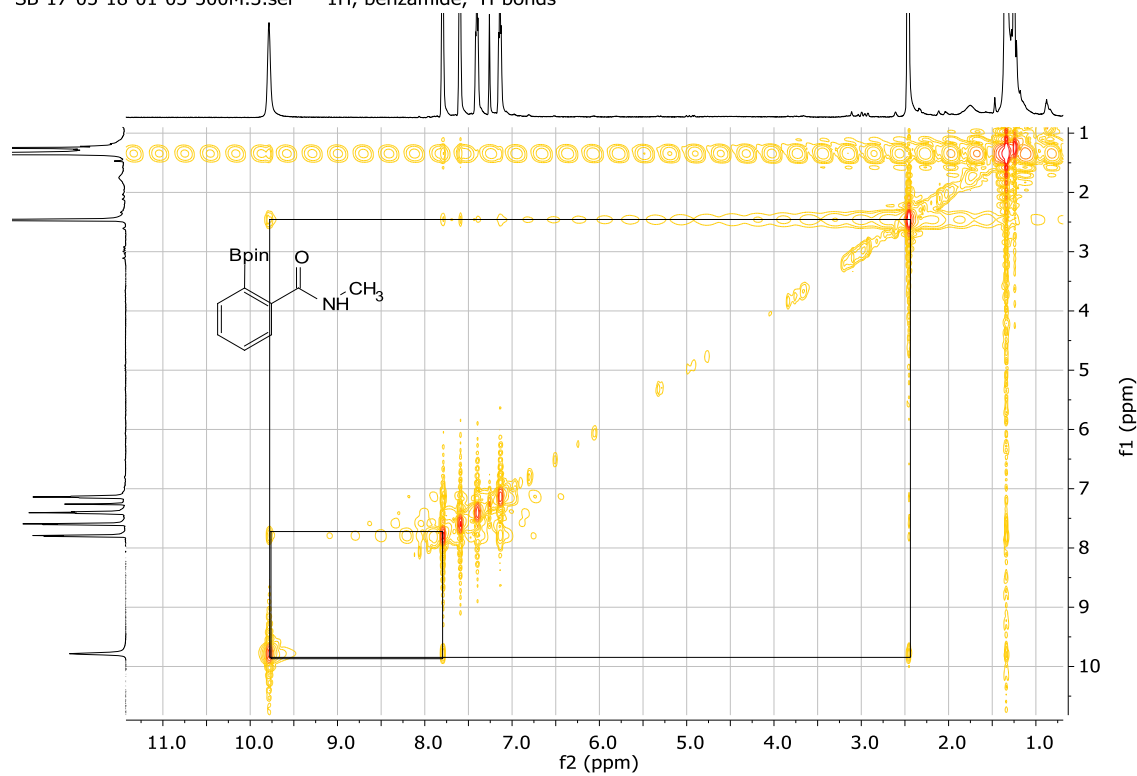Figure S57.  $^1\text{H}$ - $^1\text{H}$  NOESY NMR spectra of borylated aromatic amide **1so**

## SUPPORTING INFORMATION

SB-17-05-18-01-03-500M4.fid — <sup>13</sup>C, benzamide, H-bonds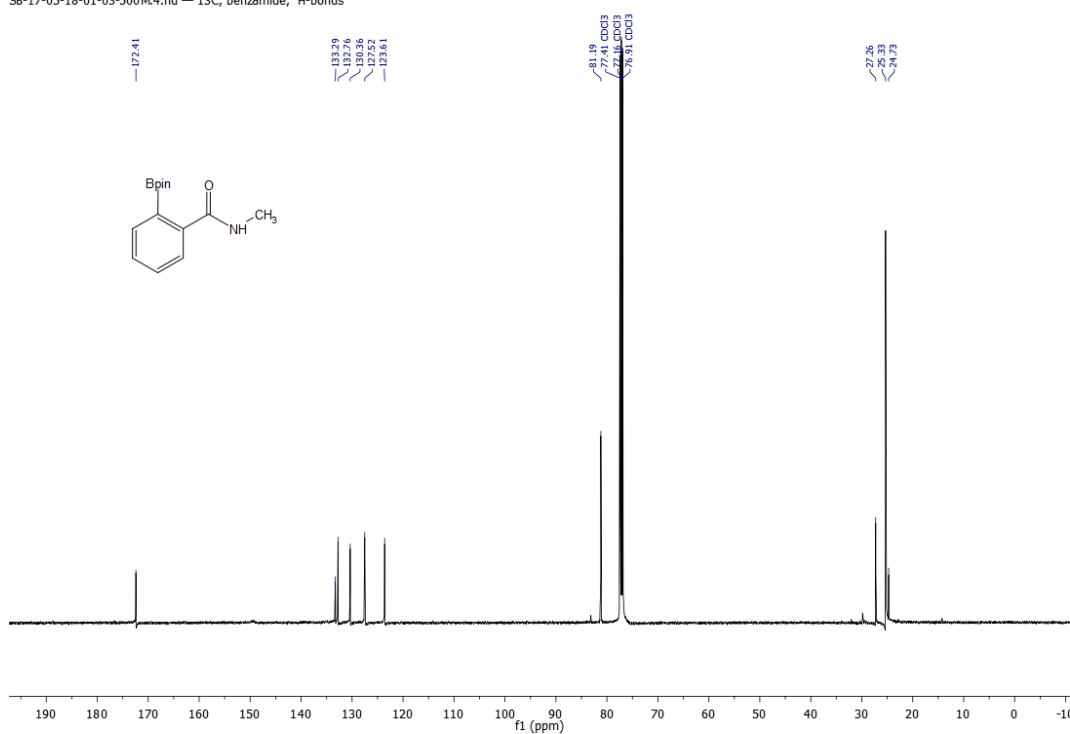Figure S58. <sup>13</sup>C NMR spectra of borylated aromatic amide **1so**SB-26-09-18-01-02-500M.1.fid — <sup>1</sup>H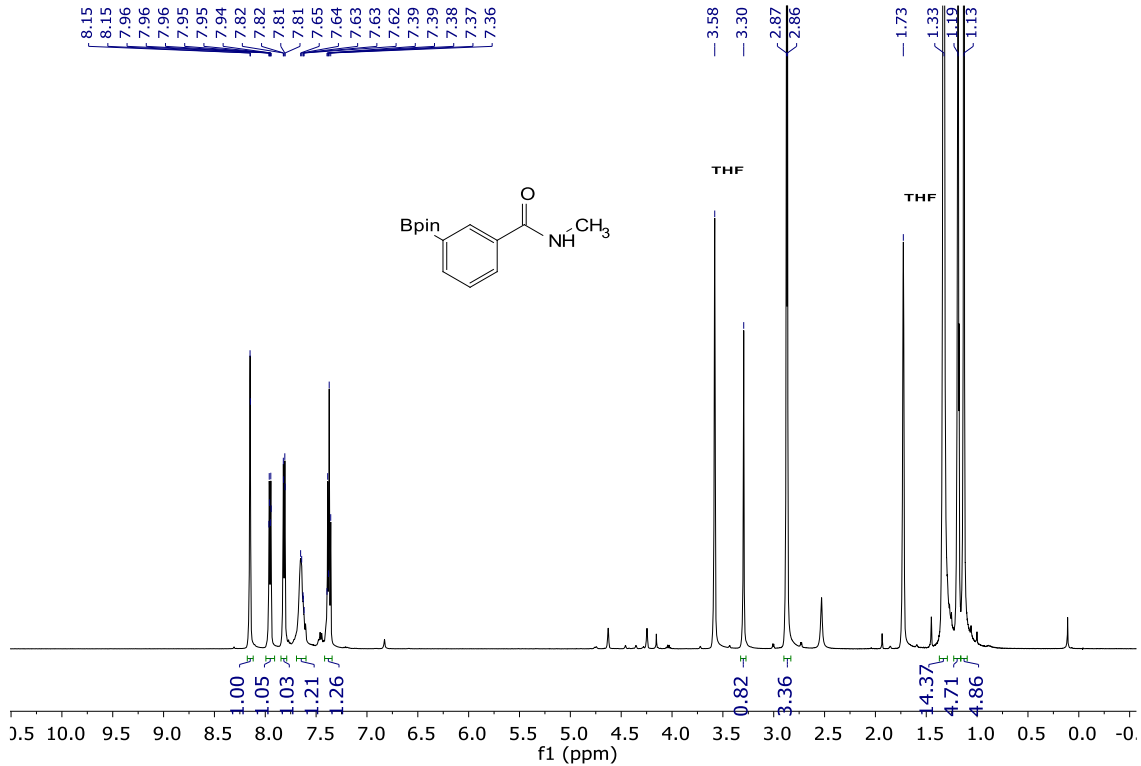Figure S59. <sup>1</sup>H NMR spectra of borylated aromatic amide **1sm**

## SUPPORTING INFORMATION

SB-26-09-18-01-02-500M.3.ser — HHcosy

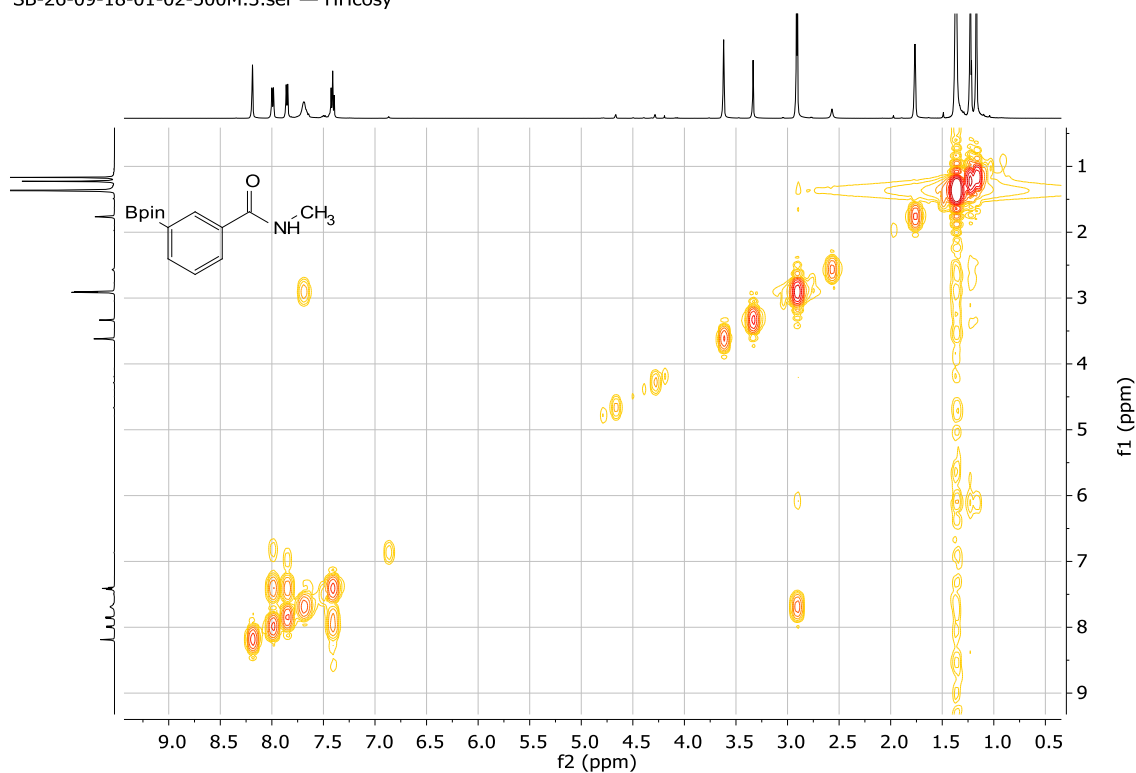Figure S60.  $^1\text{H}$ - $^1\text{H}$  COSY NMR spectra of borylated aromatic amide **1sm**

SB-26-09-18-01-02-500M.2.fid — 13C

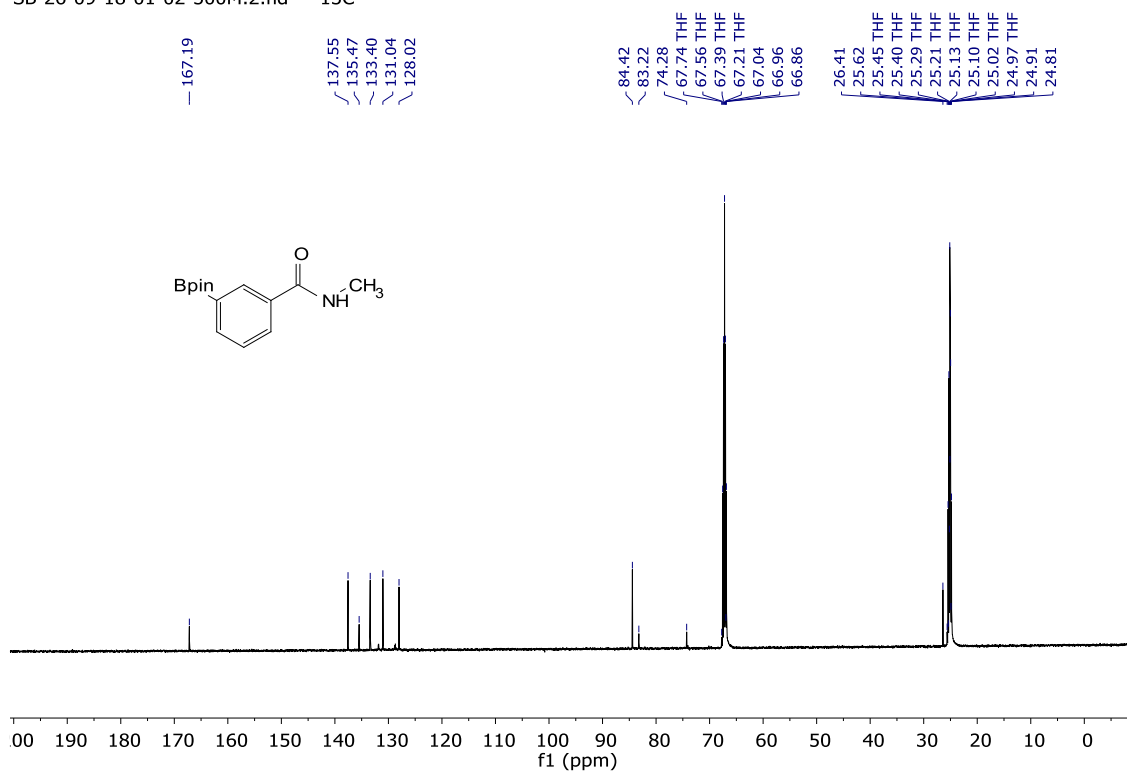Figure S61.  $^{13}\text{C}$  NMR spectra of borylated aromatic amide **1sm**



## SUPPORTING INFORMATION

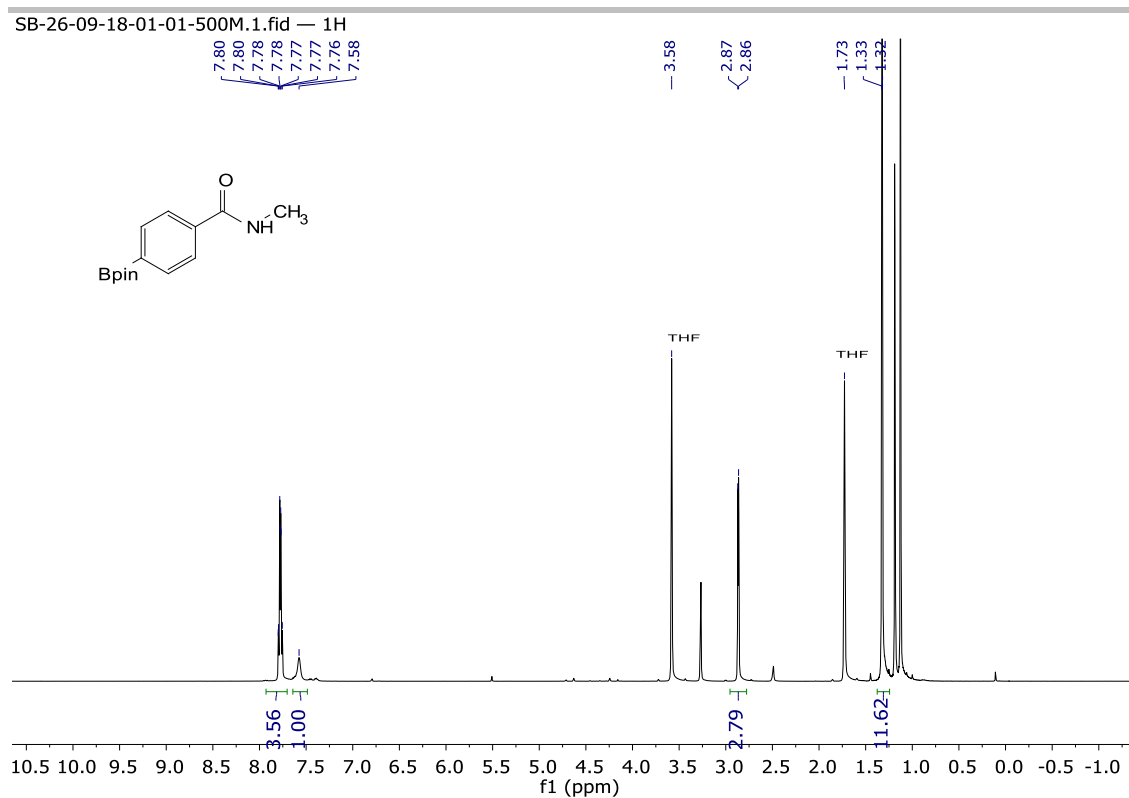

SB-26-09-18-01-01-500M.3.ser — HHcosy

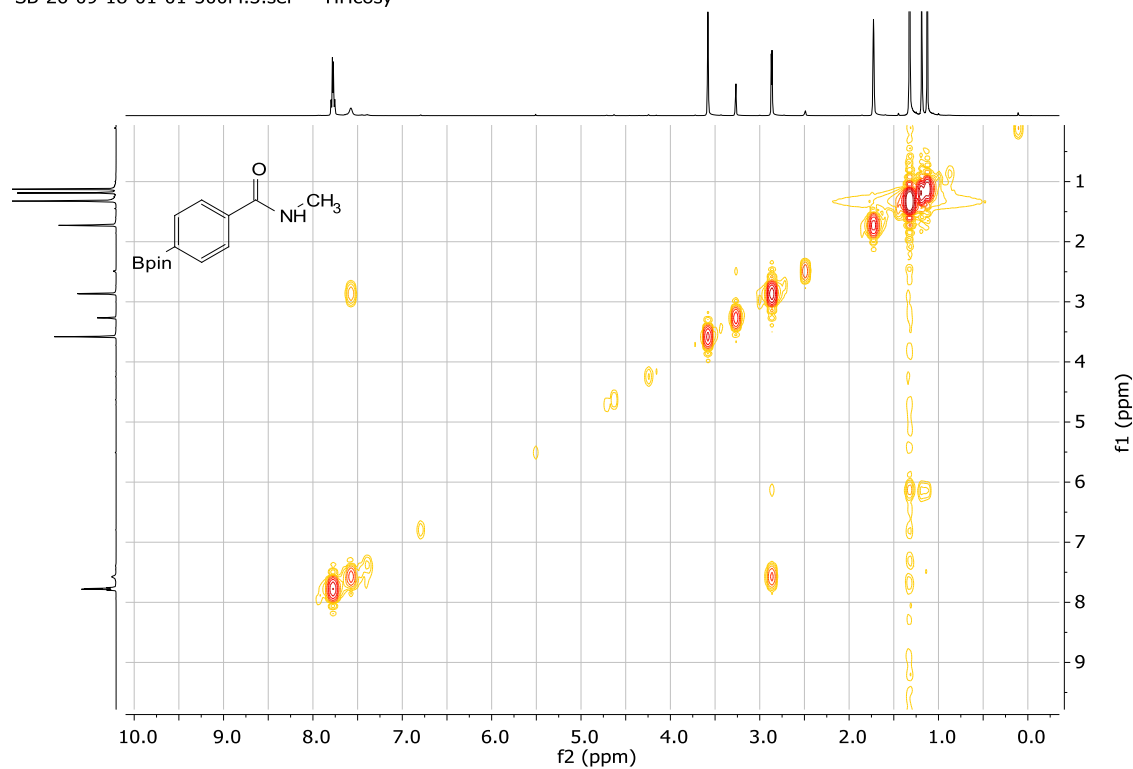

## SUPPORTING INFORMATION

SB-26-09-18-01-01-500M.2.fid — 13C

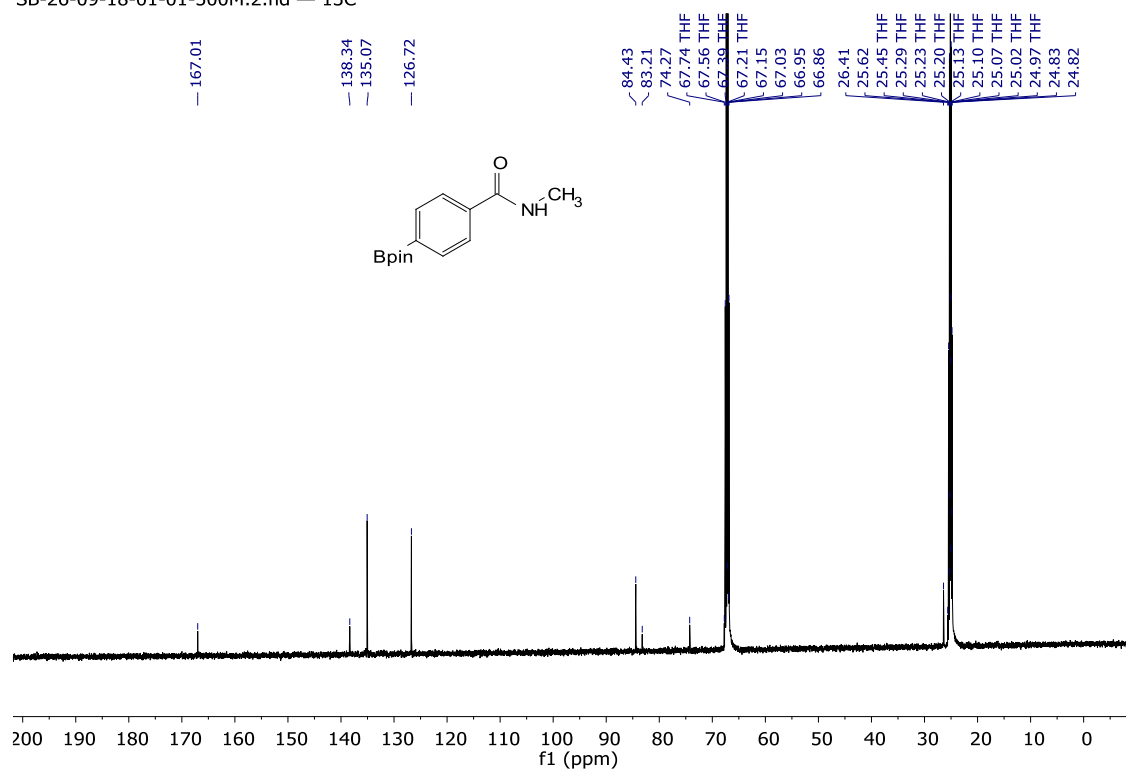Figure S64. <sup>13</sup>C NMR spectra of borylated aromatic amide **1sp**

SB-20-05-19-01-dimethyl-benzamide-bpin-500M.1.fid — 1H

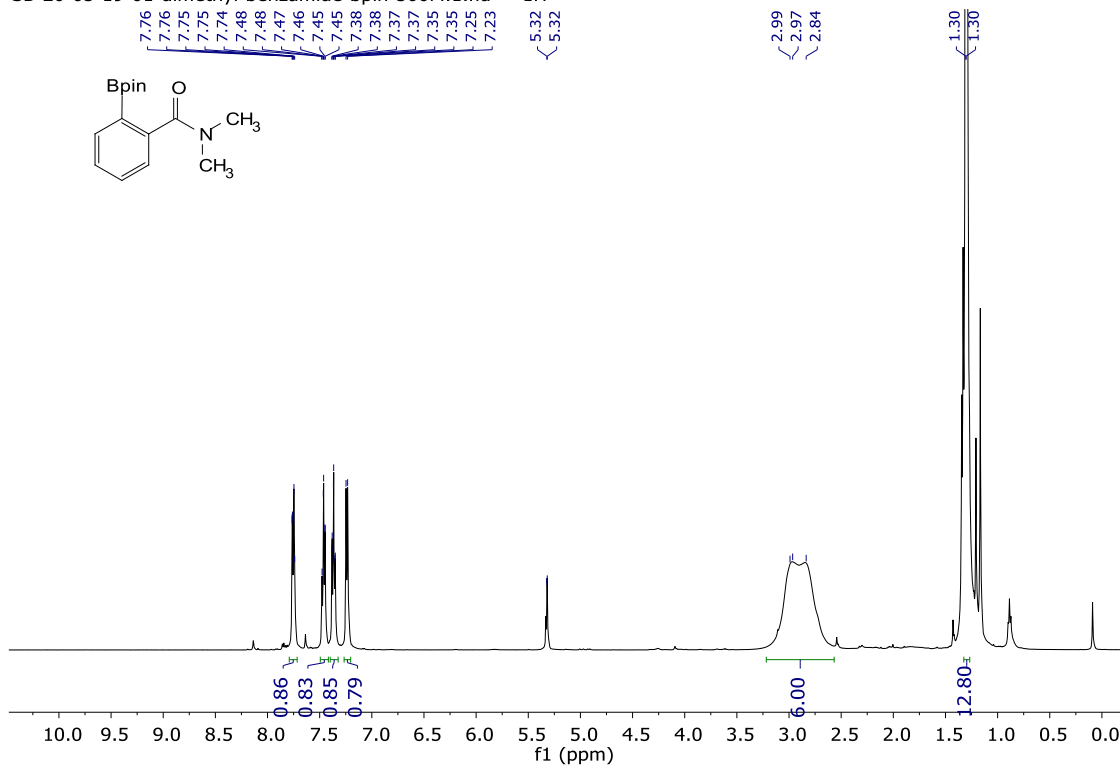Figure S65. <sup>1</sup>H NMR spectra of borylated aromatic amide **2so**

## SUPPORTING INFORMATION

SB-18-09-18-01-01B-500M.3.ser — HHcosy

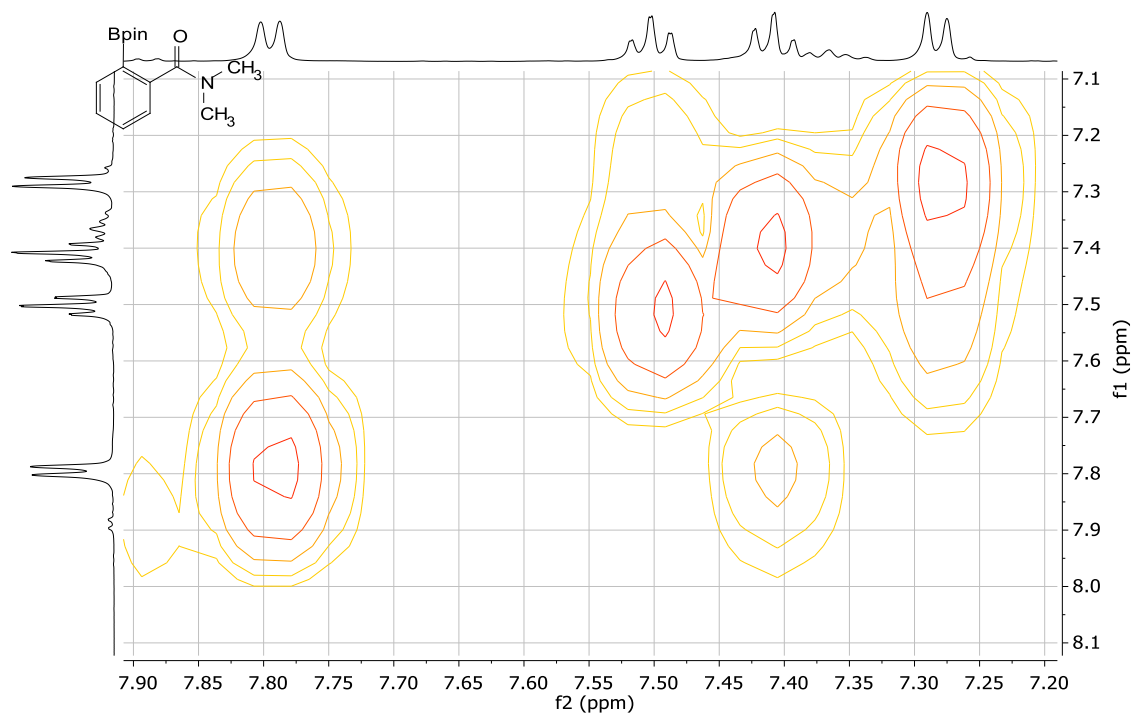Figure S66. <sup>1</sup>H-<sup>1</sup>H COSY NMR spectra of borylated aromatic amide **2so**

SB-20-05-19-01-dimethyl-benzamide-bpin-500M.2.fid — 13C

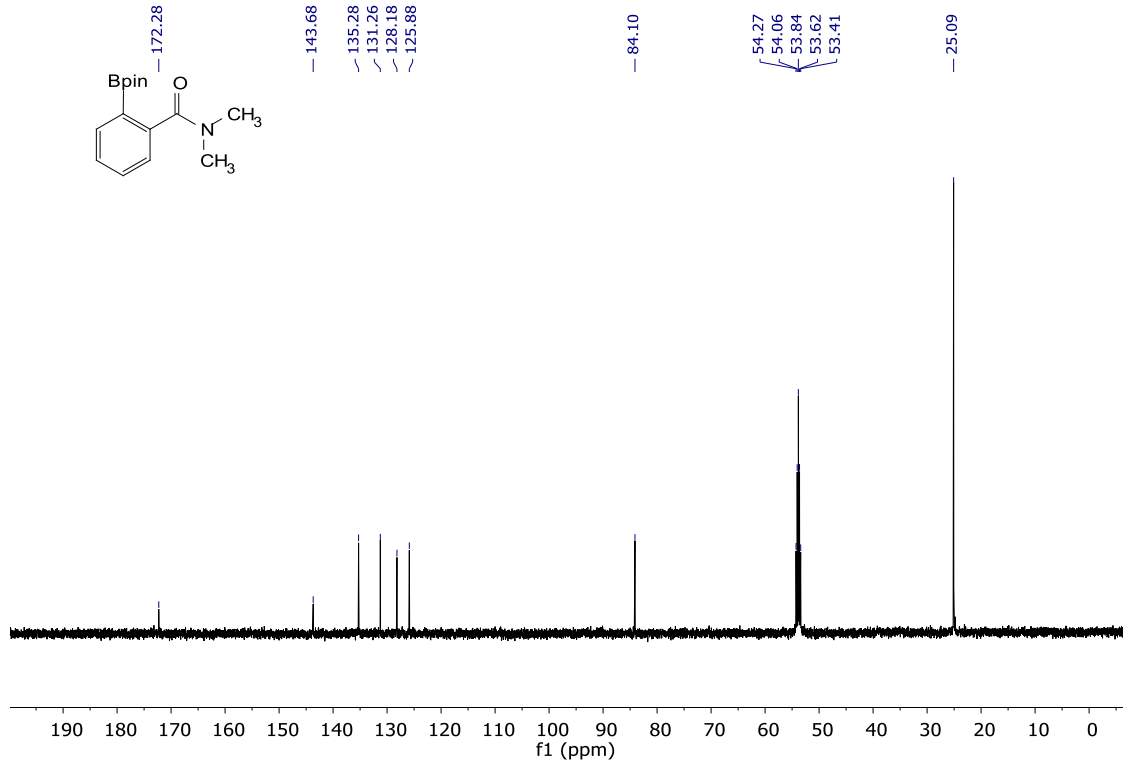Figure S67. <sup>13</sup>C NMR spectra of borylated aromatic amide **2so**

## SUPPORTING INFORMATION

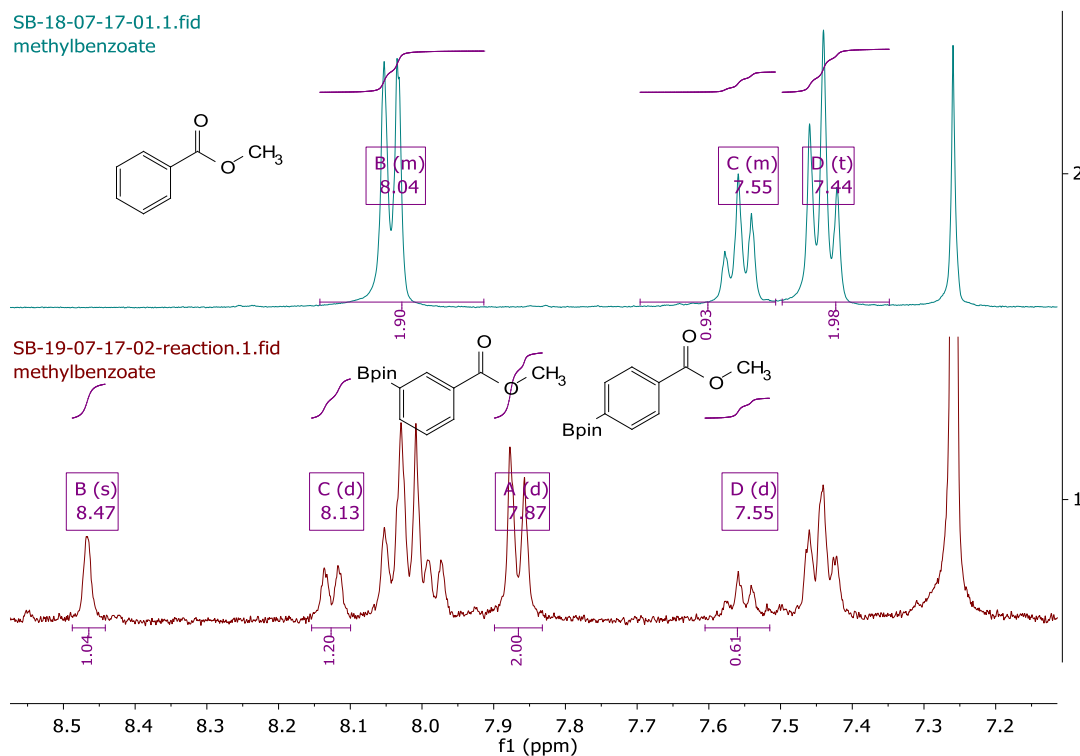

Figure S68.  $^1\text{H}$  NMR spectra of borylated aromatic amides **3sm** and **3sp** mixture (top spectra of substrate vs. bottom spectra of reaction mixture)

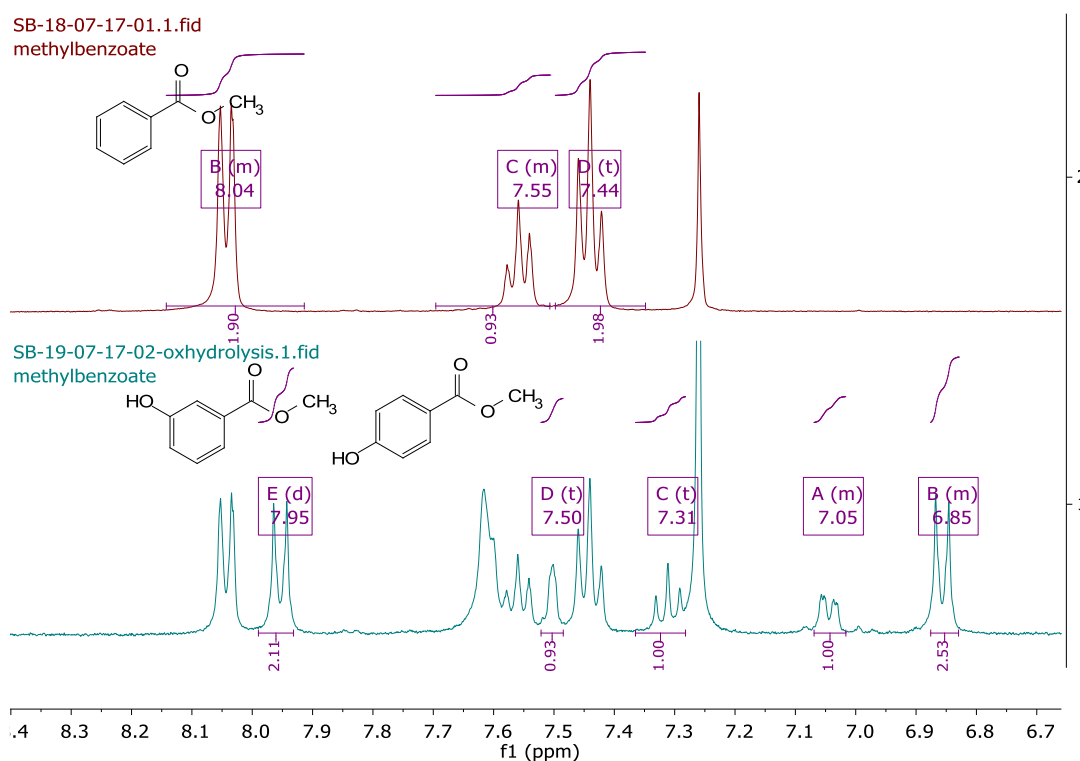

Figure S69.  $^1\text{H}$  NMR spectra of oxidation hydrolysis of borylated aromatic amide **3sm** and **3sp** mixture (top spectra of substrate vs. bottom spectra of converted products)

## SUPPORTING INFORMATION

SB-19-03-18-01-02-500M.1.fid — 1H, benzamide, H-bonds

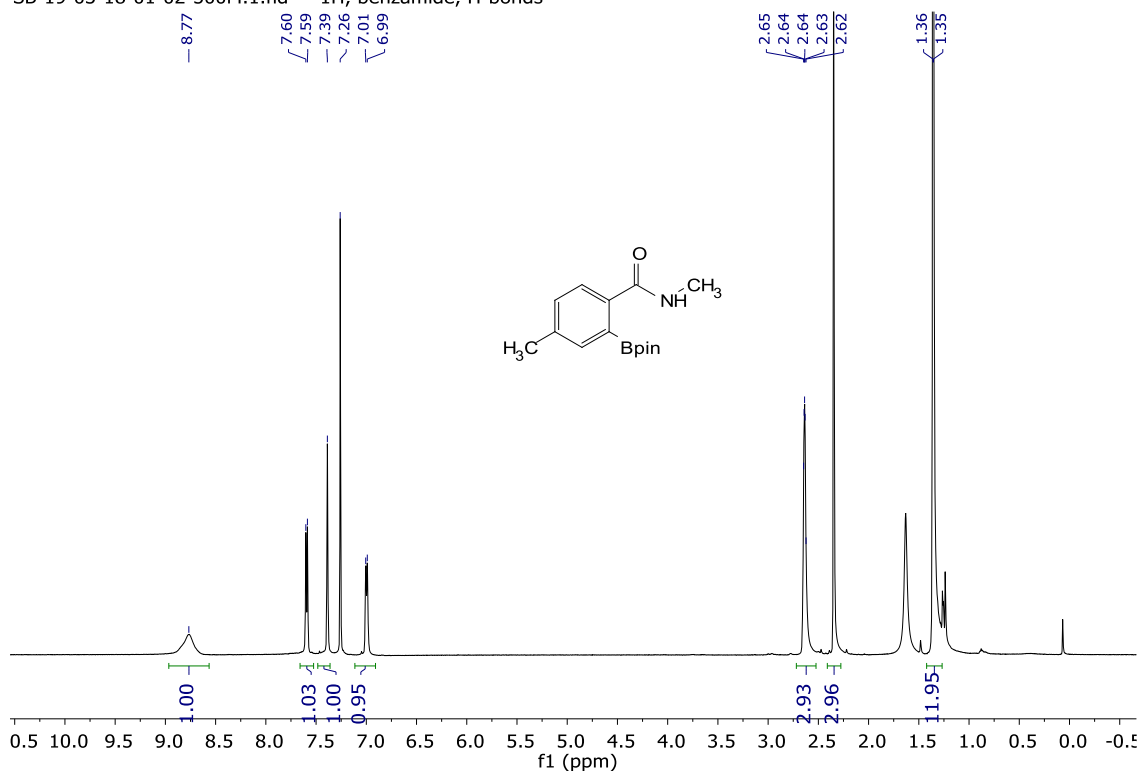Figure S70. <sup>1</sup>H NMR spectra of borylated aromatic amide **4so**

SB-19-03-18-01-02-500M.2.ser — 1H, benzamide, H-bonds

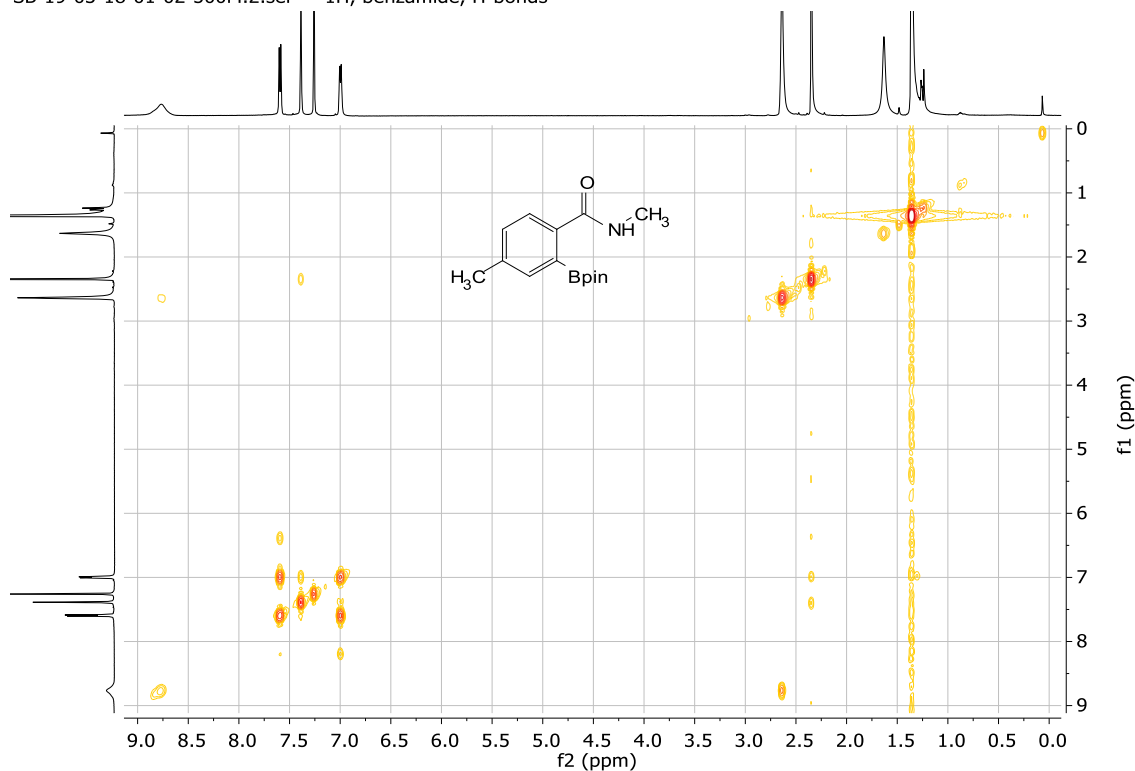Figure S71. <sup>1</sup>H-<sup>1</sup>H COSY NMR spectra of borylated aromatic amide **4so**

## SUPPORTING INFORMATION

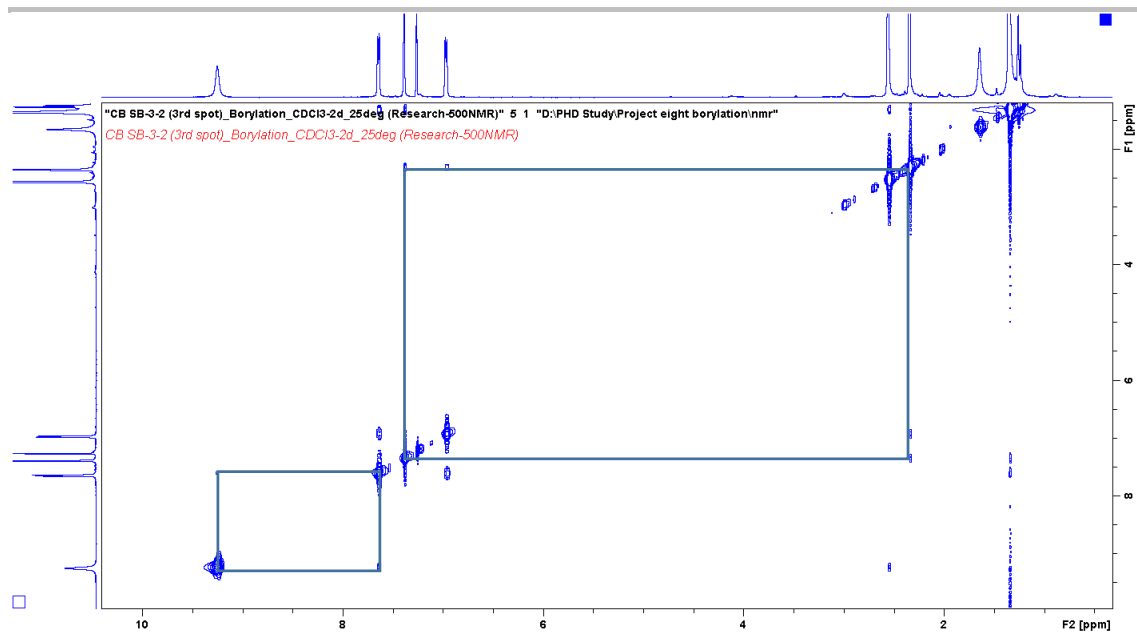Figure S72.  $^1\text{H}$ - $^1\text{H}$  NOESY NMR spectra of borylated aromatic amide **4so**SB-19-03-18-01-02-500M.3.fid —  $^{13}\text{C}$ , para-methyl benzamide, H-bonds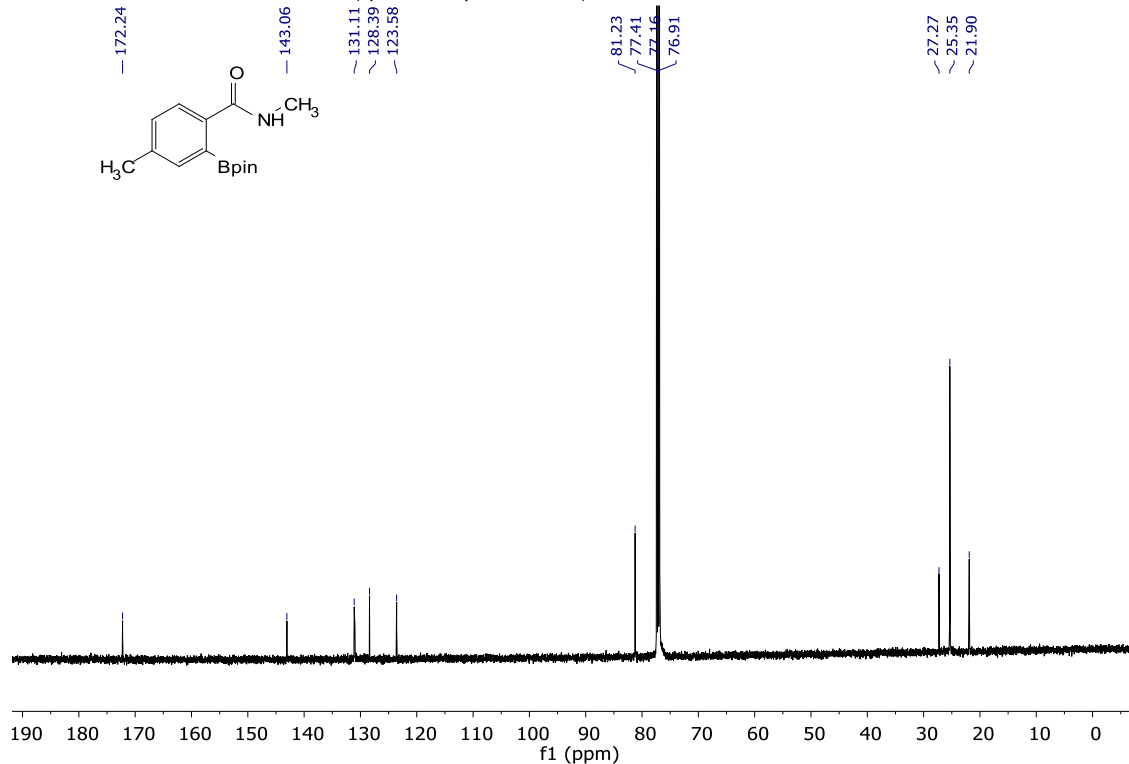Figure S73.  $^{13}\text{C}$  NMR spectra of borylated aromatic amide **4so**

## SUPPORTING INFORMATION

SB-20-05-19-02-meta-methyl-benzamide-bpin-500M.3.fid — 1H-2

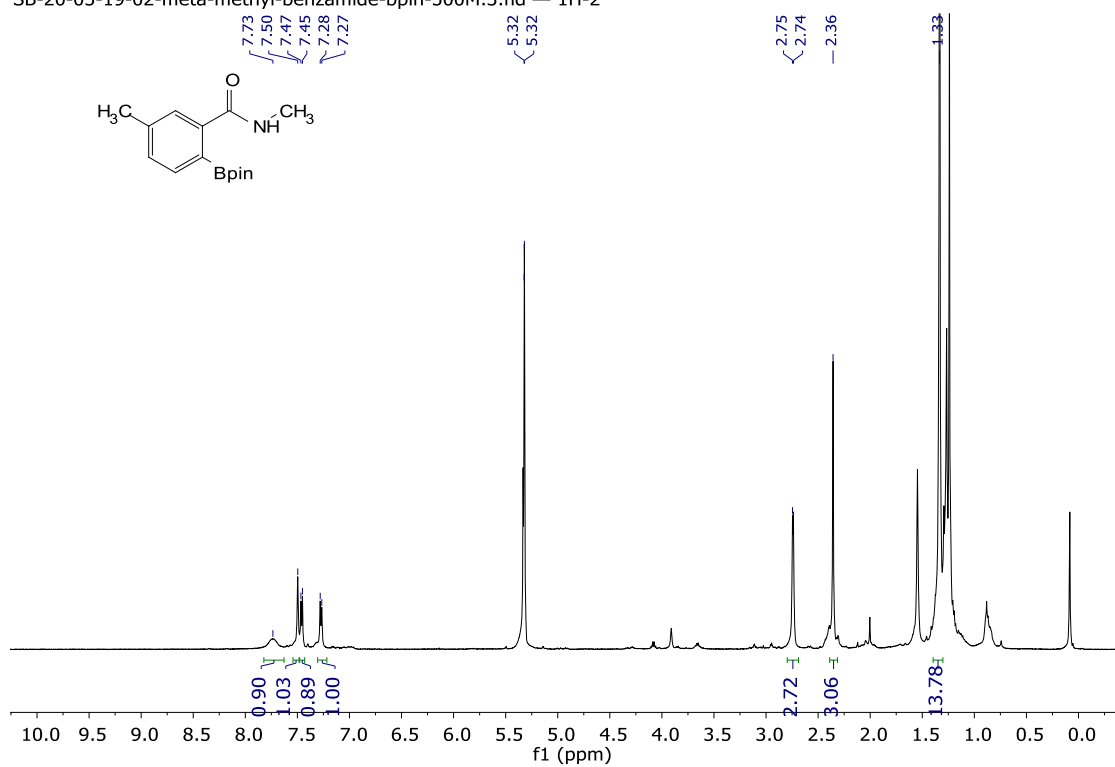Figure S74. <sup>1</sup>H NMR spectra of borylated aromatic amide **5so**

SB-20-05-19-02-meta-methyl-benzamide-bpin-500M.4.fid — 13C-2

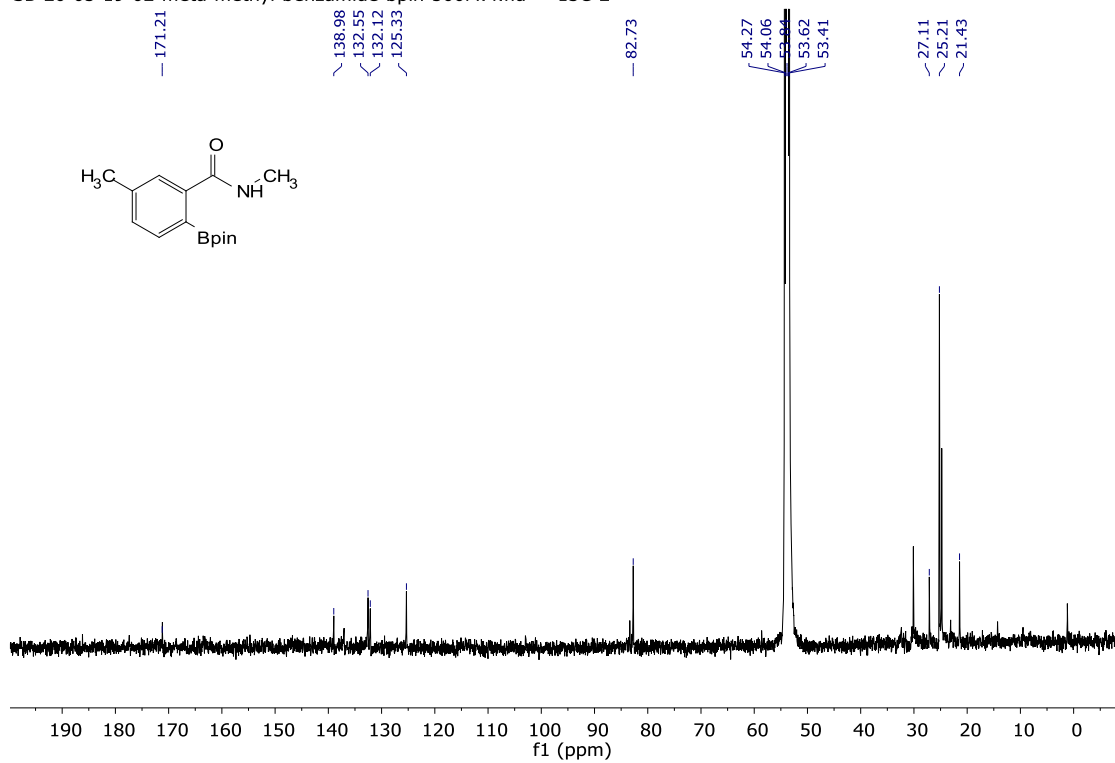Figure S75. <sup>13</sup>C NMR spectra of borylated aromatic amide **5so**

## SUPPORTING INFORMATION

SB-25-10-18-01-01A-500M.1.fid — 1H

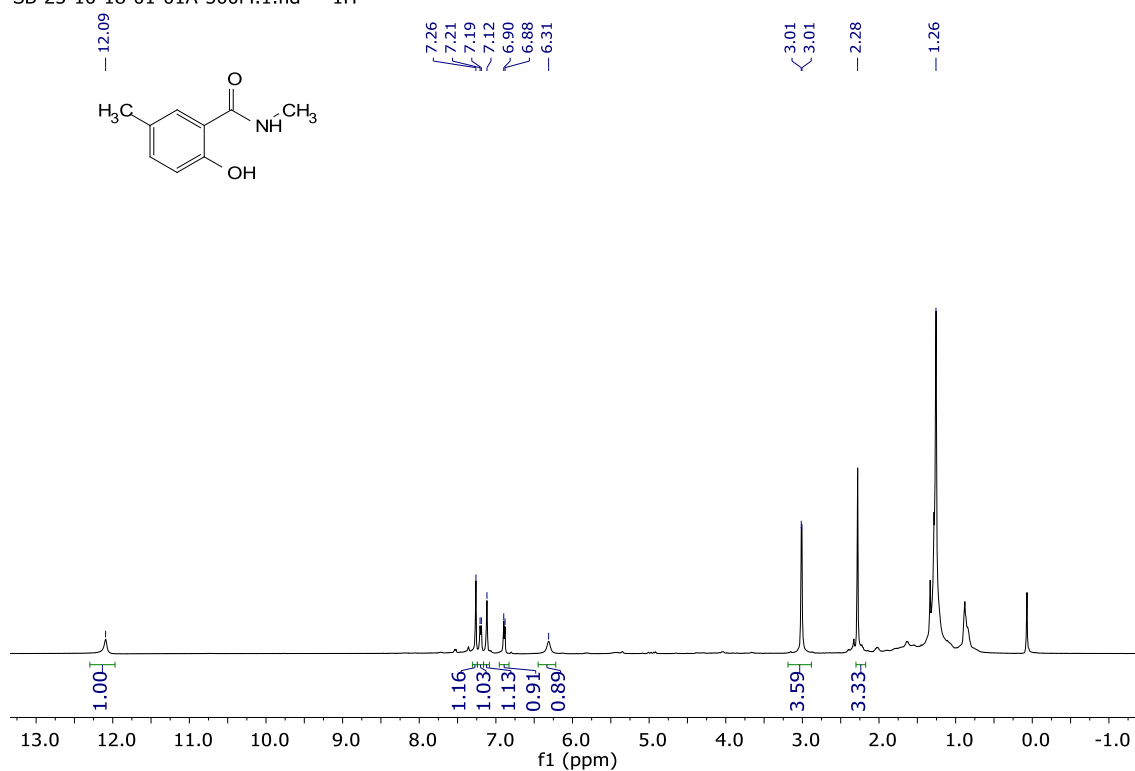Figure S76. <sup>1</sup>H NMR spectra of borylated aromatic amide **5so'**

SB-28-04-18-01-07-500M.1.fid — 1H

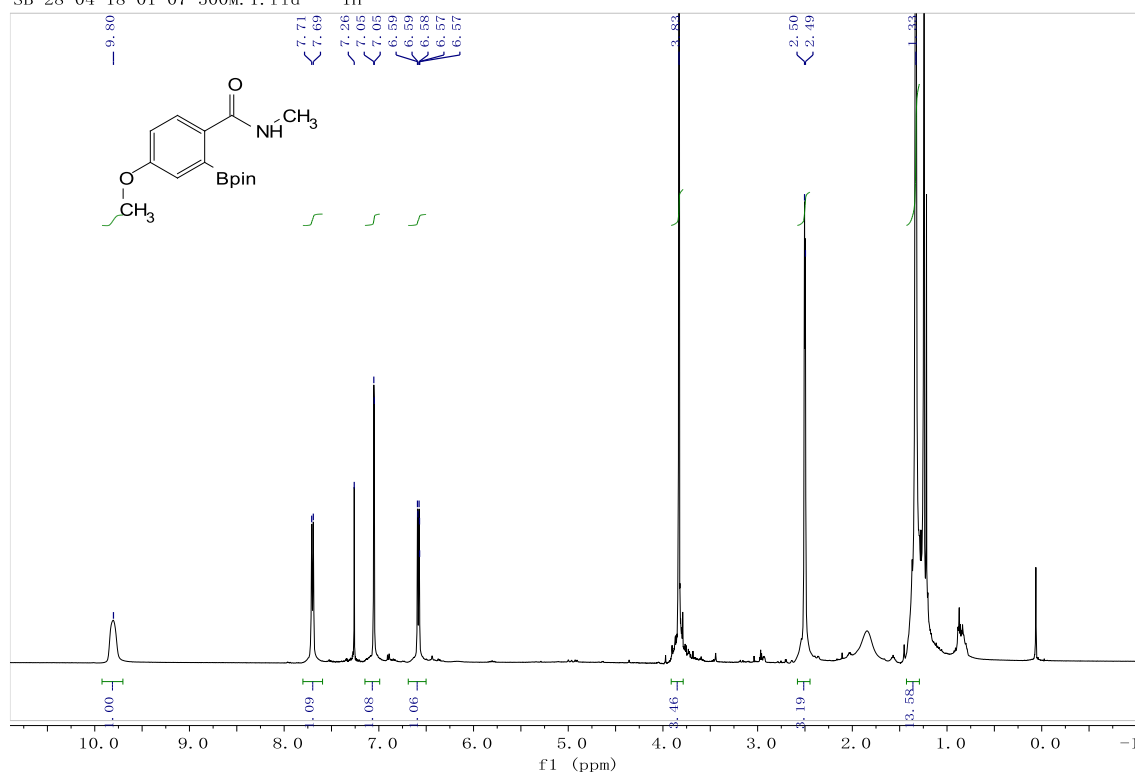Figure S77. <sup>1</sup>H NMR spectra of borylated aromatic amide **6so**



## SUPPORTING INFORMATION

SB-28-04-18-01-07-500M.2.ser — <sup>1</sup>H-cosy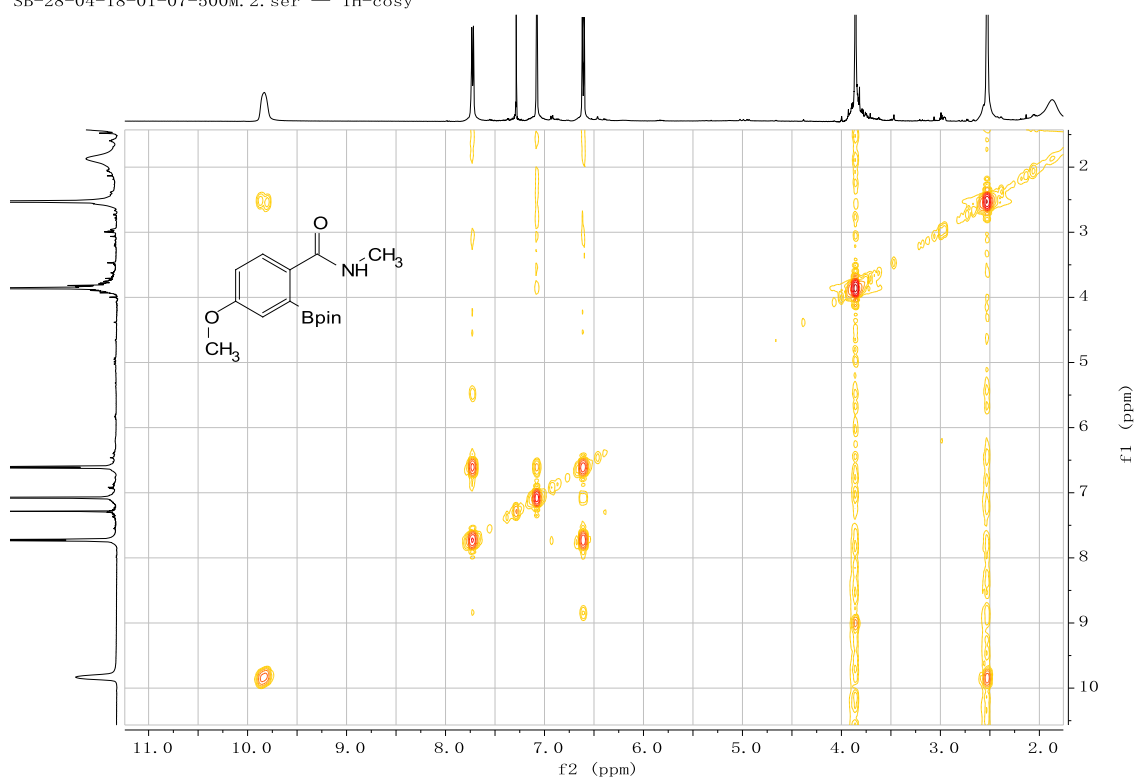Figure S78. <sup>1</sup>H-<sup>1</sup>H COSY NMR spectra of borylated aromatic amide **6so**SB-30-03-18-01-03-500M.6.fid — <sup>13</sup>C, para-tBu benzamide, H-bonds, should be meo-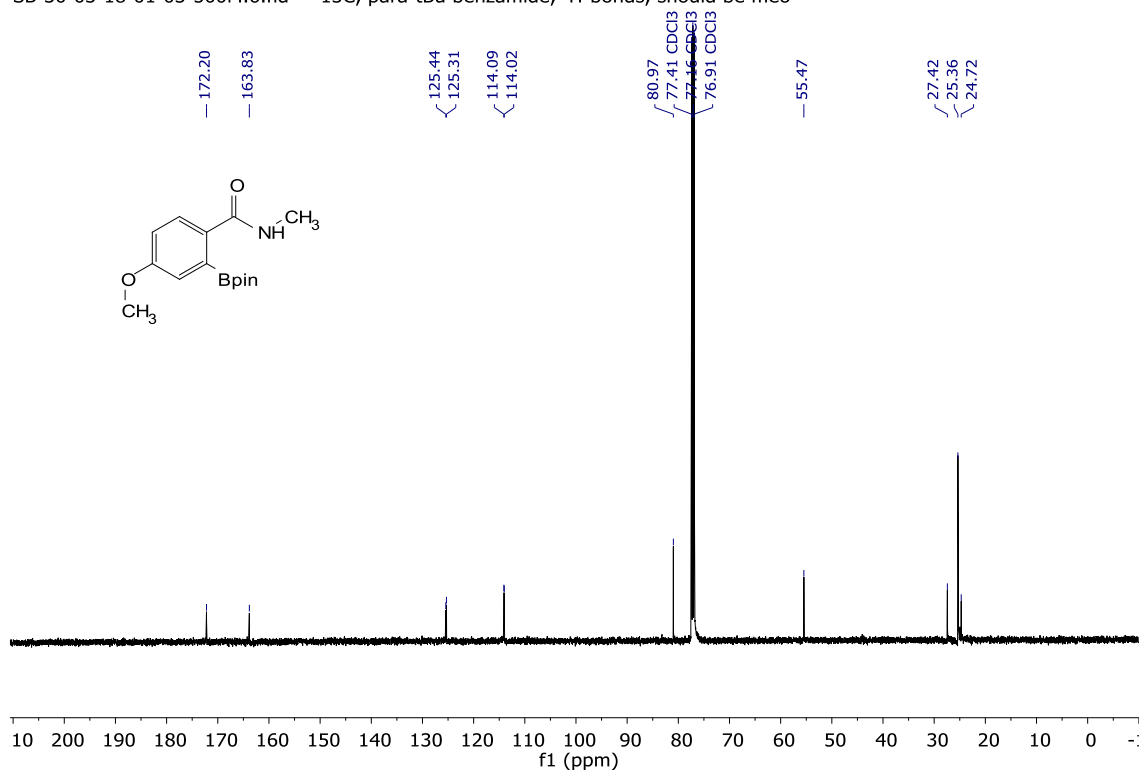Figure S79. <sup>13</sup>C NMR spectra of borylated aromatic amide **6so**

## SUPPORTING INFORMATION

SB-28-05-17-01-02-500M.6.fid — 1H, para-cf3 benzamide, H-bonds,thf

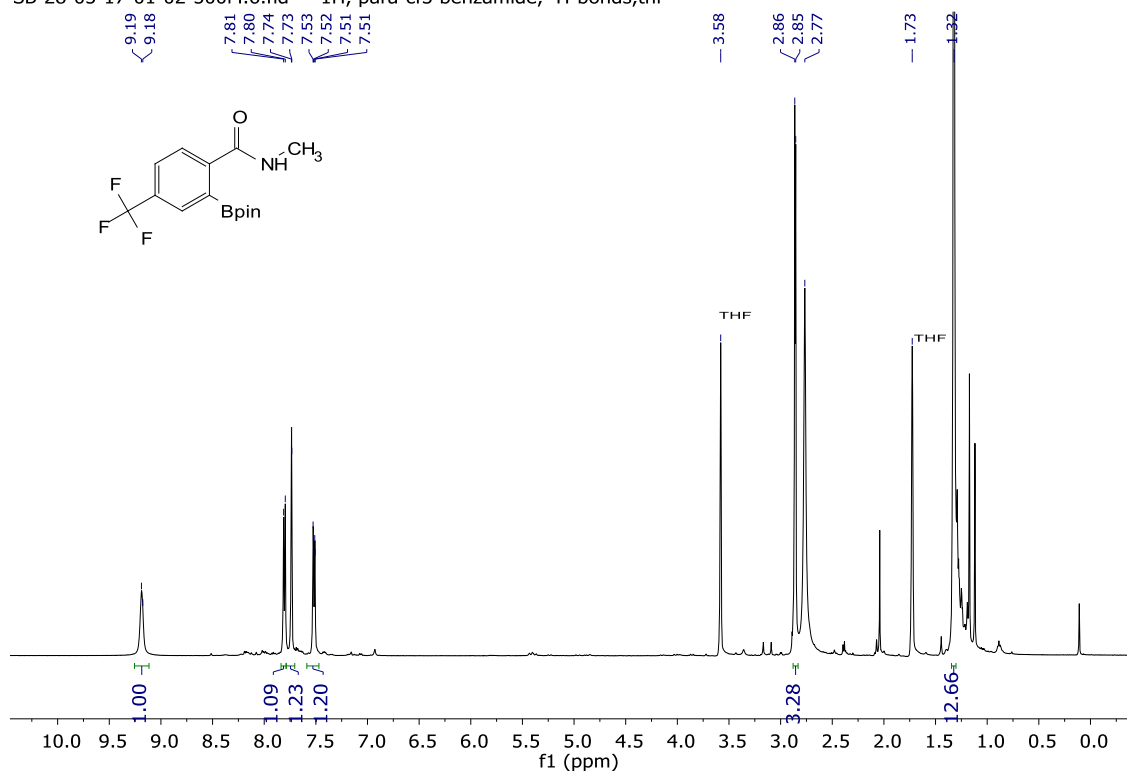Figure S80.  $^1\text{H}$  NMR spectra of borylated aromatic amide **7so**

SB-28-05-17-01-02-500M.4.fid — 1H, para-cf3 benzamide, H-bonds

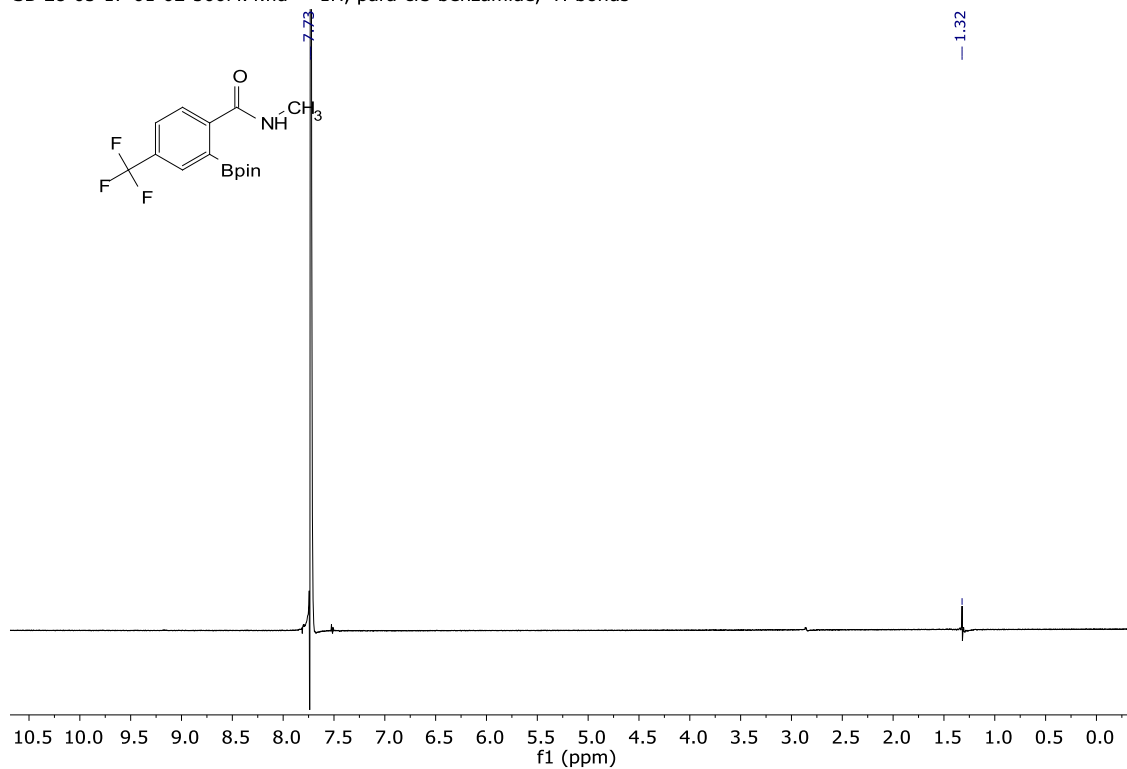Figure S81.  $^1\text{H}$ - $^1\text{H}$  1D NOESY NMR spectra of borylated aromatic amide **7so**

## SUPPORTING INFORMATION

SB-28-05-17-01-02-500M.3.fid — <sup>13</sup>C, para-cf3benzamide, H-bonds, thf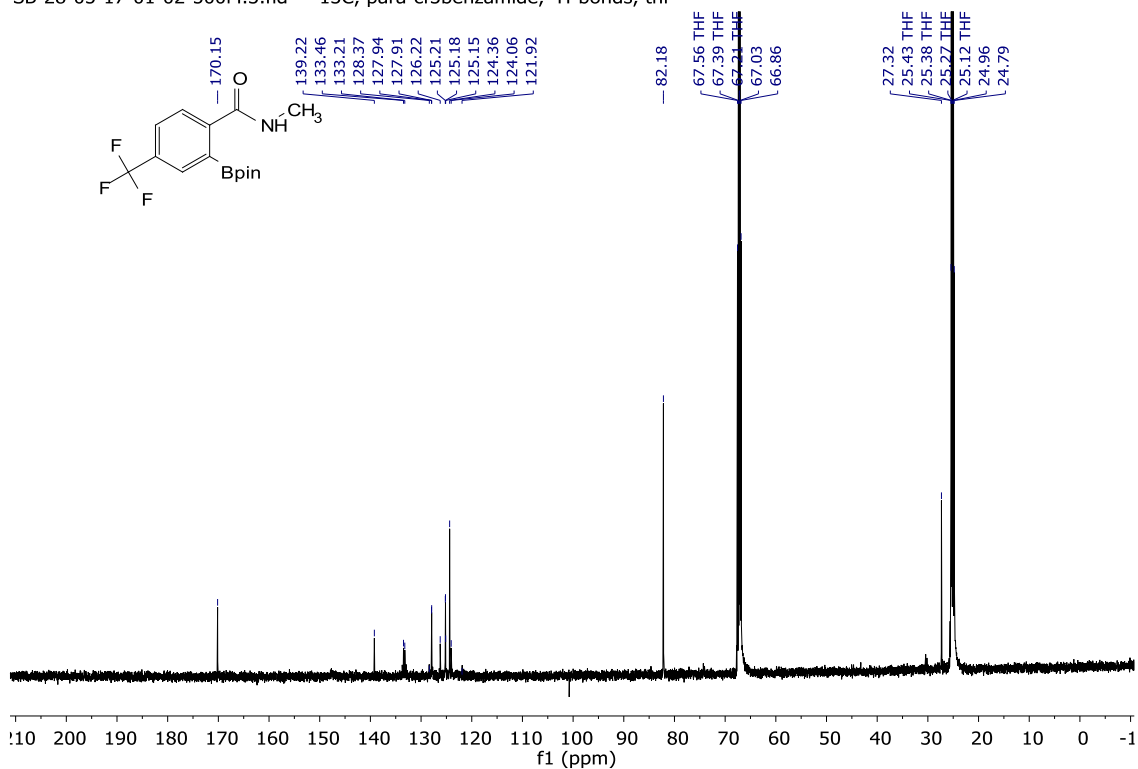Figure S82. <sup>13</sup>C NMR spectra of borylated aromatic amide **7so**SB-30-03-18-01-04-F2-500M.3.fid — <sup>1</sup>H, para-Bn benzamide, H-bonds, work-up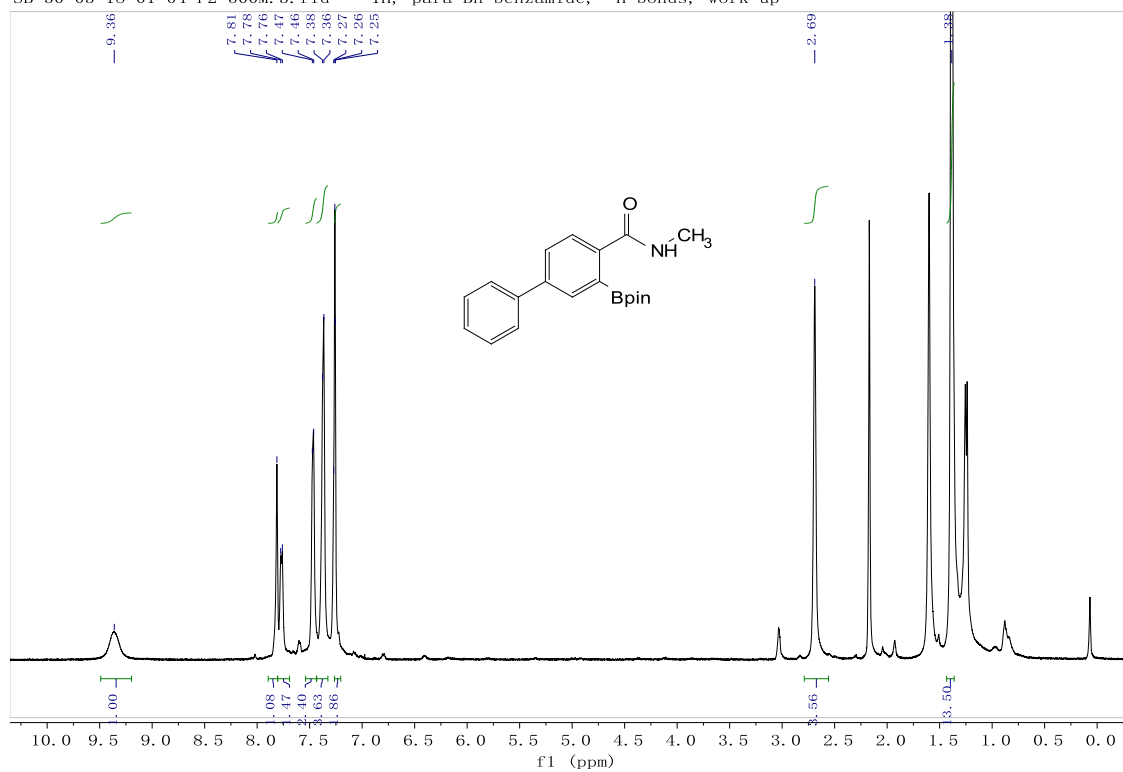Figure S83. <sup>1</sup>H NMR spectra of borylated aromatic amide **8so**

## SUPPORTING INFORMATION

SB-30-03-18-01-04-F2-500M. 4. ser — 1H, para-Bn benzamide, H-bonds, work-up

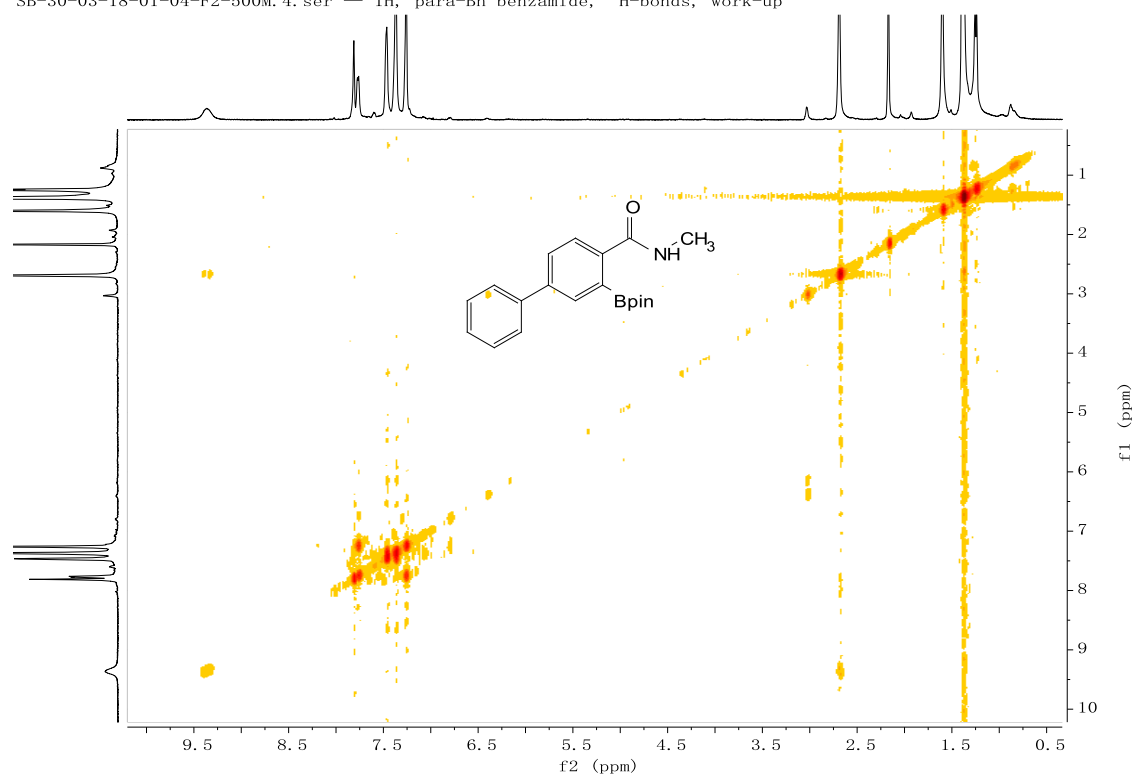Figure S84.  $^1\text{H}$ - $^1\text{H}$  COSY NMR spectra of borylated aromatic amide **8so**SB-30-03-18-01-04-F2-500M. 5. fid —  $^{13}\text{C}$ , para-Bn benzamide, H-bonds, work-up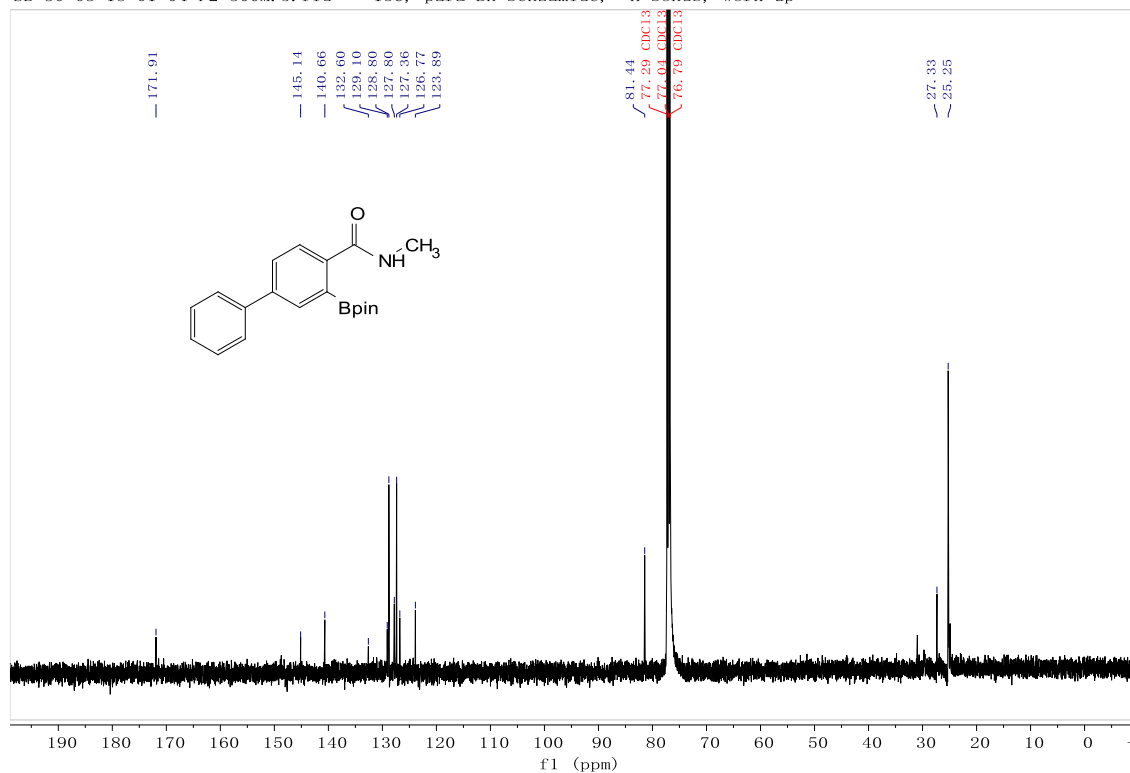Figure S85.  $^{13}\text{C}$  NMR spectra of borylated aromatic amide **8so**

## SUPPORTING INFORMATION

SB-30-03-18-01-03-500M.1.fid — <sup>1</sup>H, para-tBu benzamide, H-bonds,withcontrol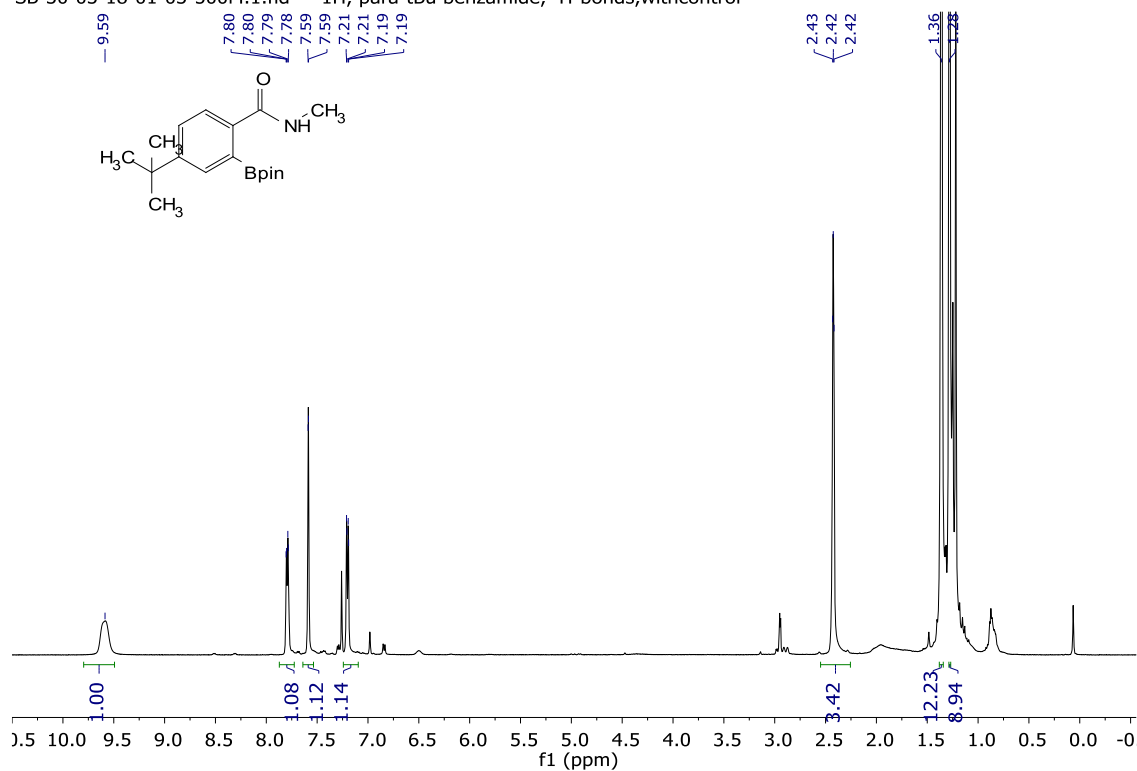Figure S86. <sup>1</sup>H NMR spectra of borylated aromatic amide **9so**SB-30-03-18-01-03-500M.2.ser — <sup>1</sup>H COSY, para-tBu benzamide, H-bonds,withoutcontrol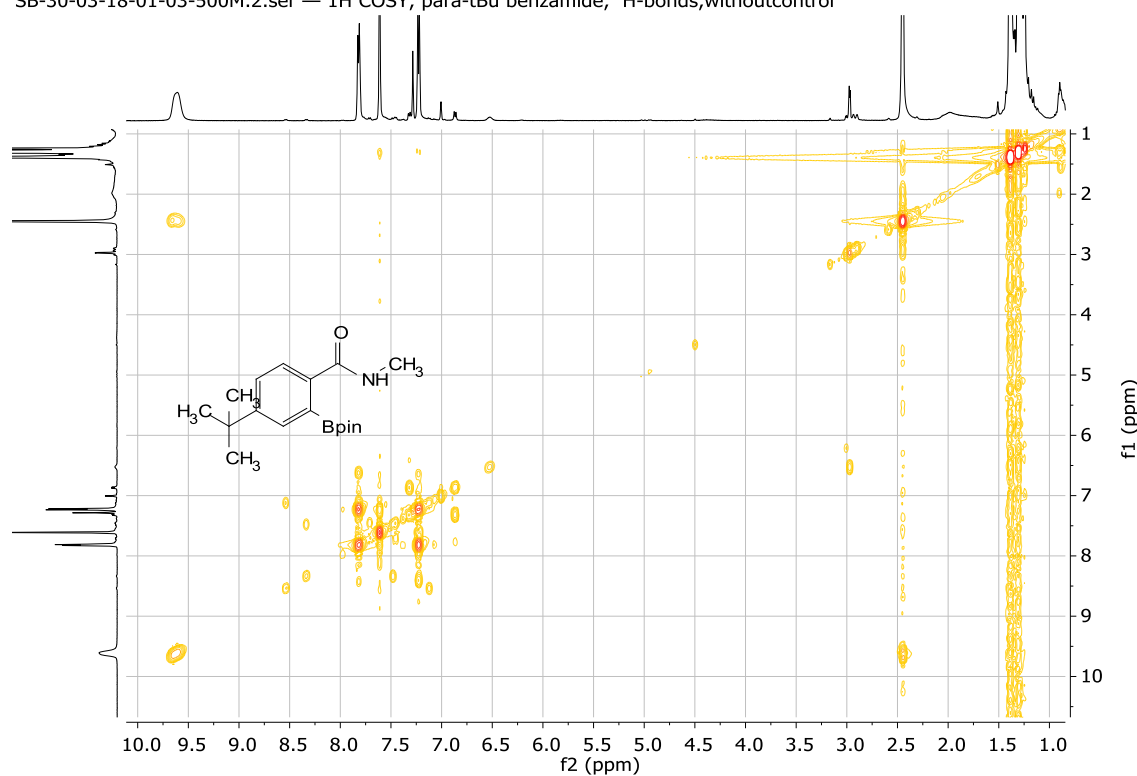Figure S87. <sup>1</sup>H-<sup>1</sup>H COSY NMR spectra of borylated aromatic amide **9so**

## SUPPORTING INFORMATION

SB-30-03-18-01-03-500M.5.fid — <sup>13</sup>C COSY, para-tBu benzamide, H-bonds, without control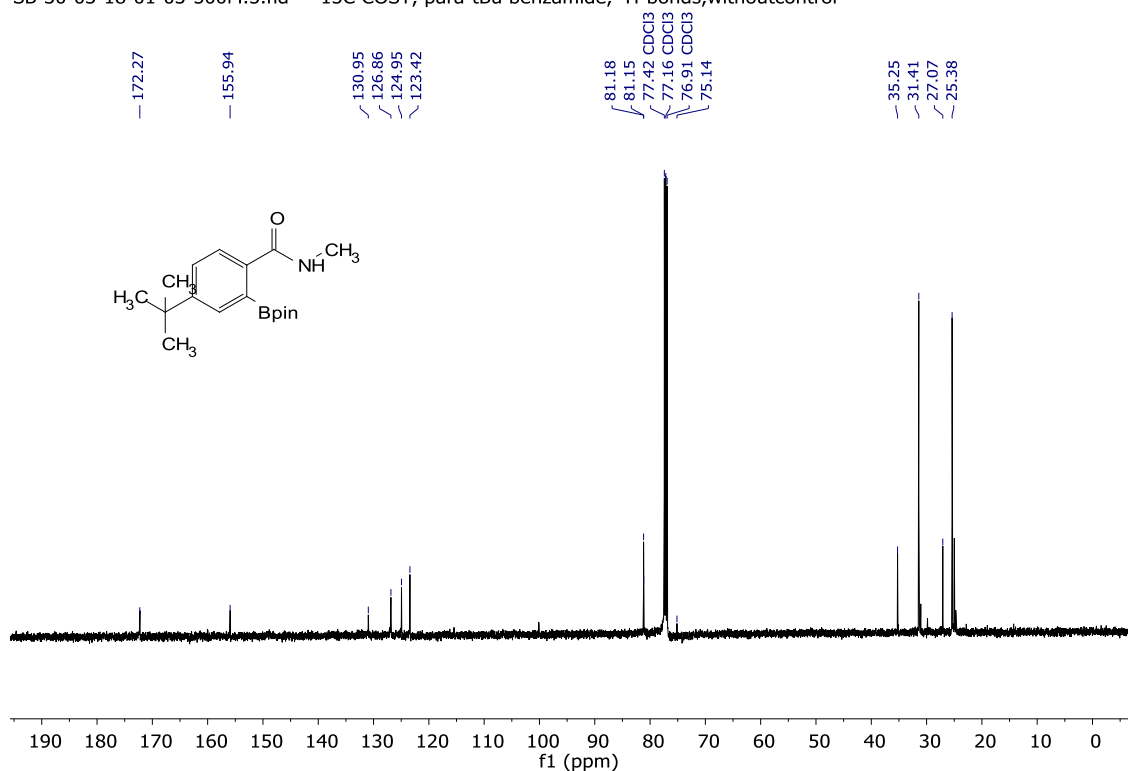Figure S88. <sup>13</sup>C NMR spectra of borylated aromatic amide **9so**SB-28-05-17-01-01B-500M.1.fid — <sup>1</sup>H, para-chloride benzamide, H-bonds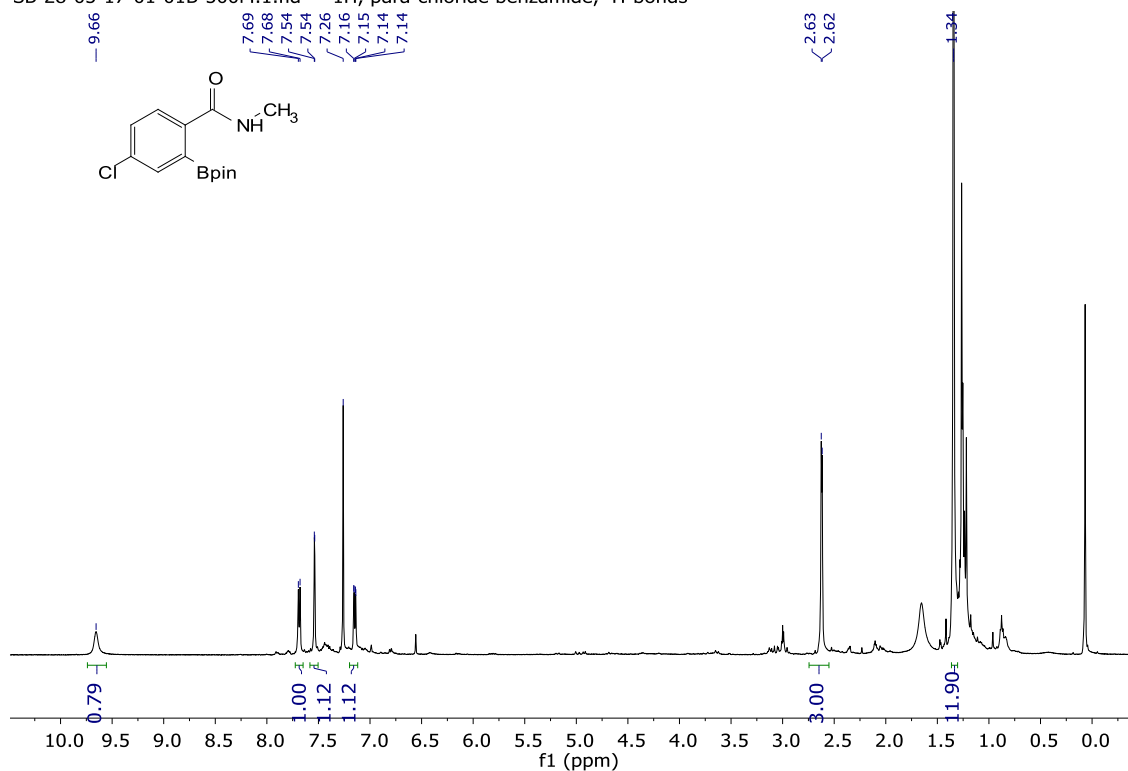Figure S89. <sup>1</sup>H NMR spectra of borylated aromatic amide **10so**

## SUPPORTING INFORMATION

SB-28-05-17-01-01B-500M.2.ser — 1H, para-chloride benzamide, H-bonds

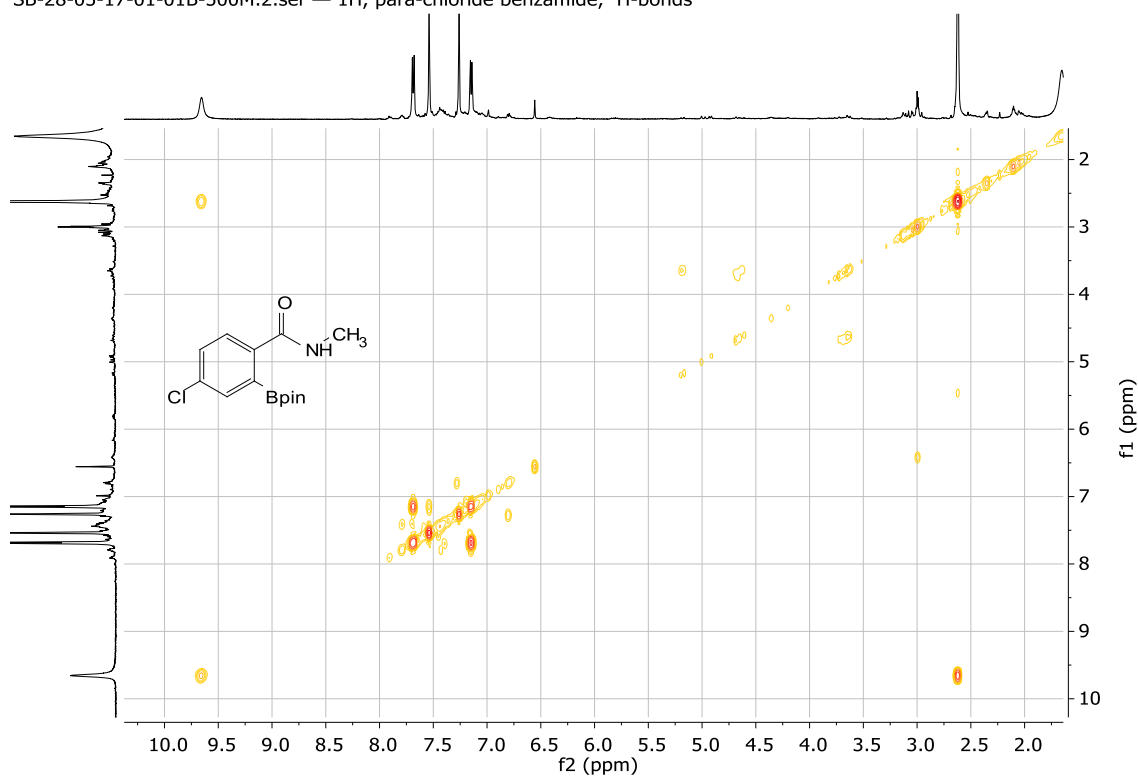Figure S90. <sup>1</sup>H-<sup>1</sup>H COSY NMR spectra of borylated aromatic amide **10so**

SB-28-05-17-01-01B-500M.4.fid — 1H, para-chloride benzamide, H-bonds

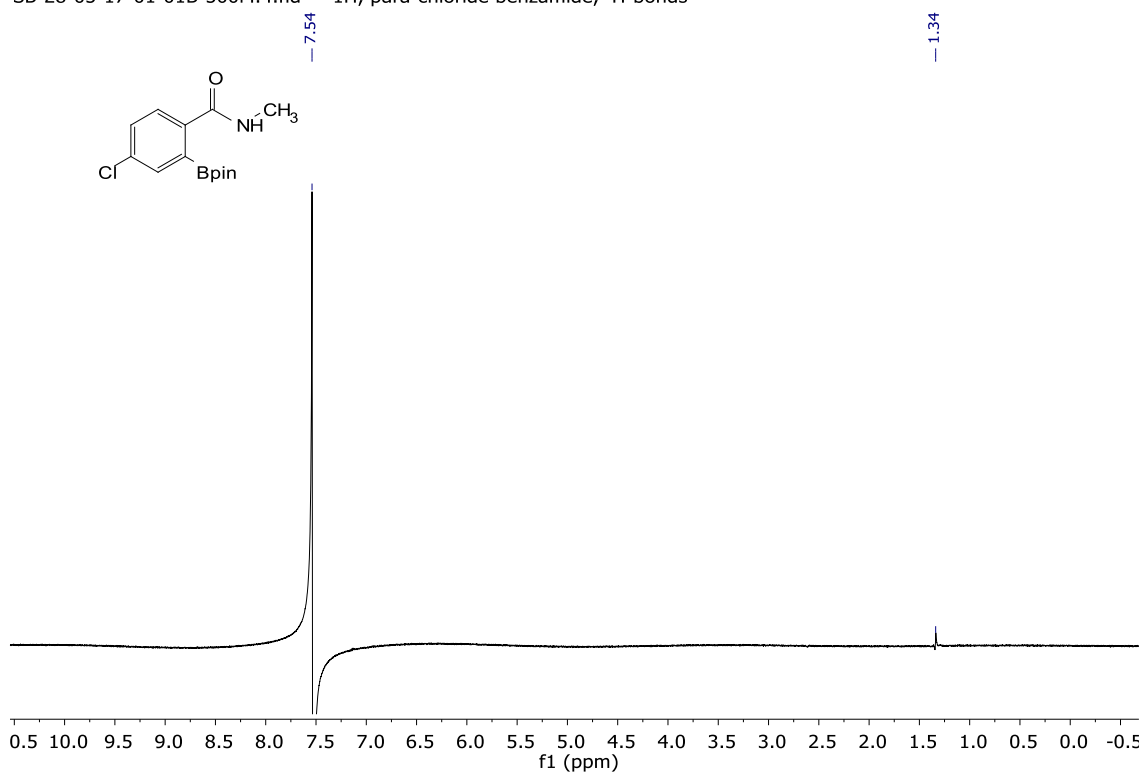Figure S91. <sup>1</sup>H-<sup>1</sup>H 1D NOESY NMR spectra of aromatic amide **10so**

## SUPPORTING INFORMATION

SB-28-05-17-01-01B-500M.3.fid — <sup>13</sup>C, para-chloride benzamide, H-bonds, work-up, repu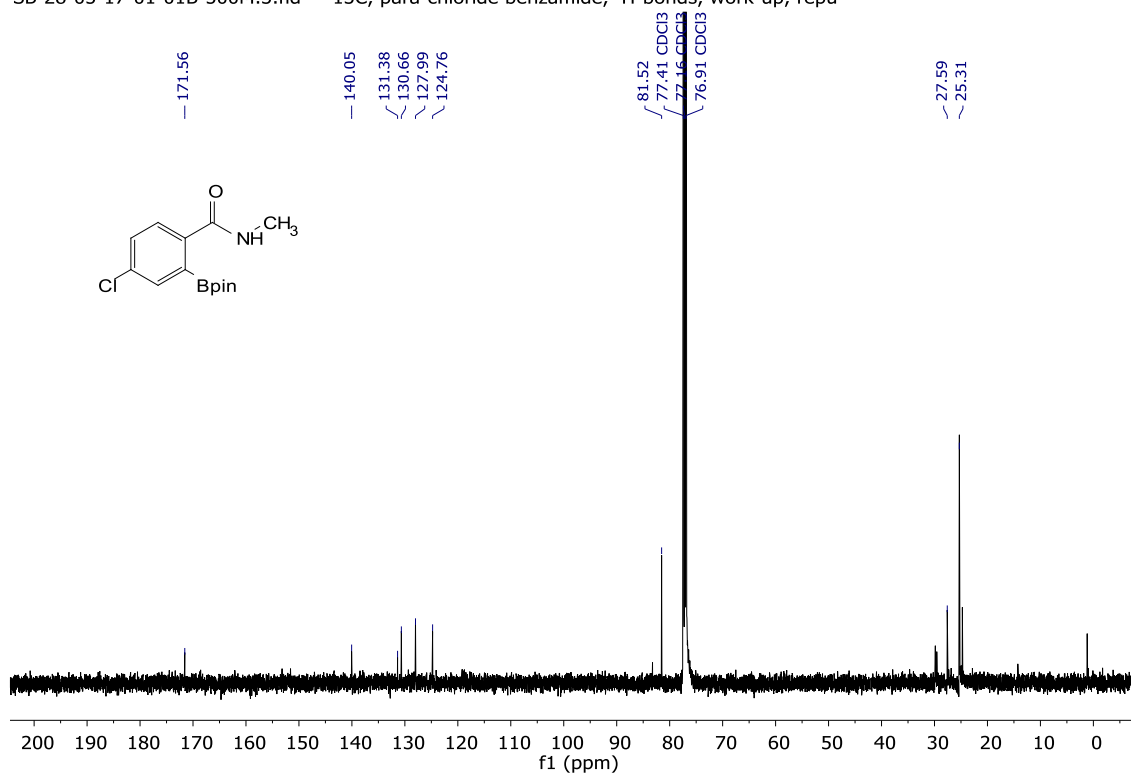Figure S92. <sup>13</sup>C NMR spectra of borylated aromatic amide **10so**SB-20-05-19-04-parabromo-benzamide-bpin-500M.1.fid — <sup>1</sup>H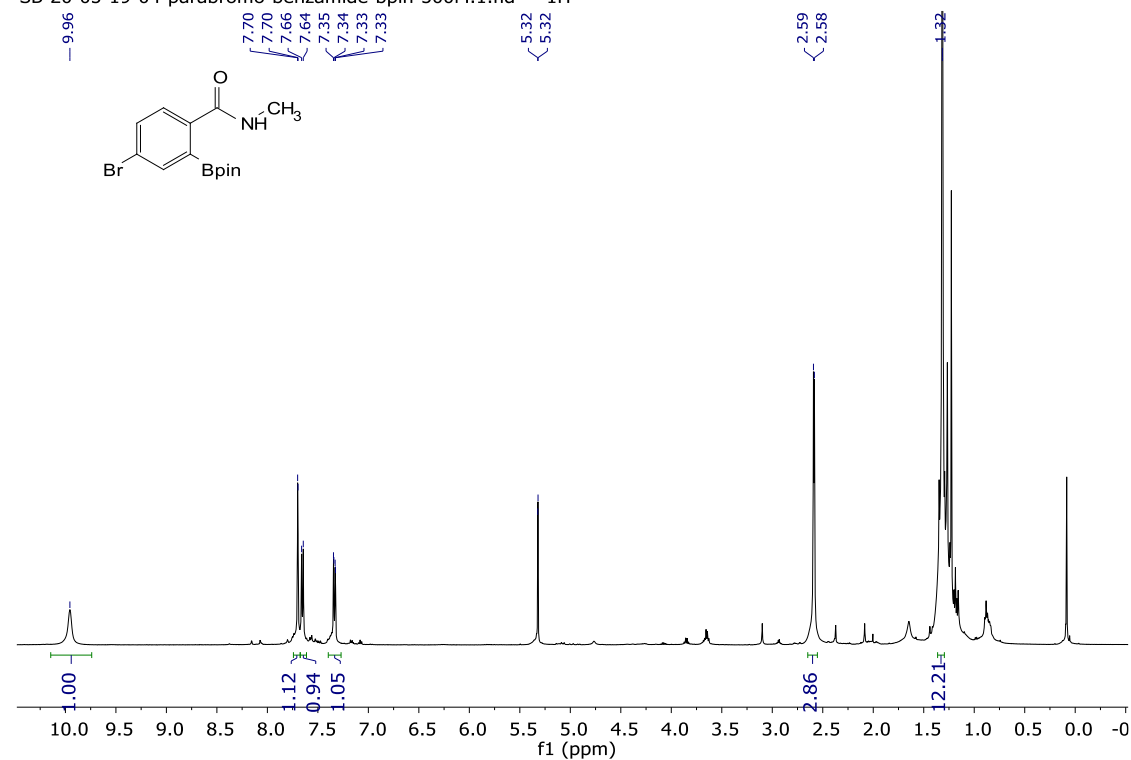Figure S93. <sup>1</sup>H NMR spectra of borylated aromatic amide **11so**



## SUPPORTING INFORMATION

SB-20-05-19-04-parabromo-benzamide-bpin-500M.2.fid — 13C

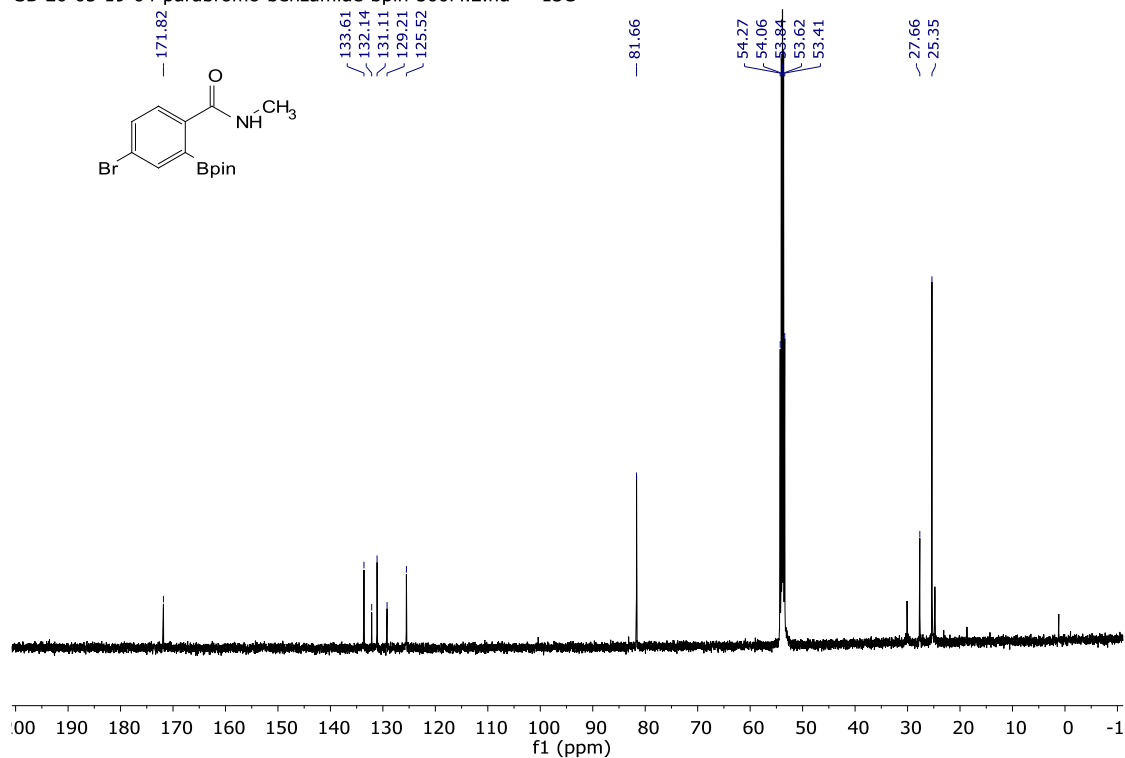Figure S94.  $^{13}\text{C}$  NMR spectra of borylated aromatic amide **11so**

SB-20-05-19-RP-benzylbenzamide-bpin-500M.1.fid — 1H

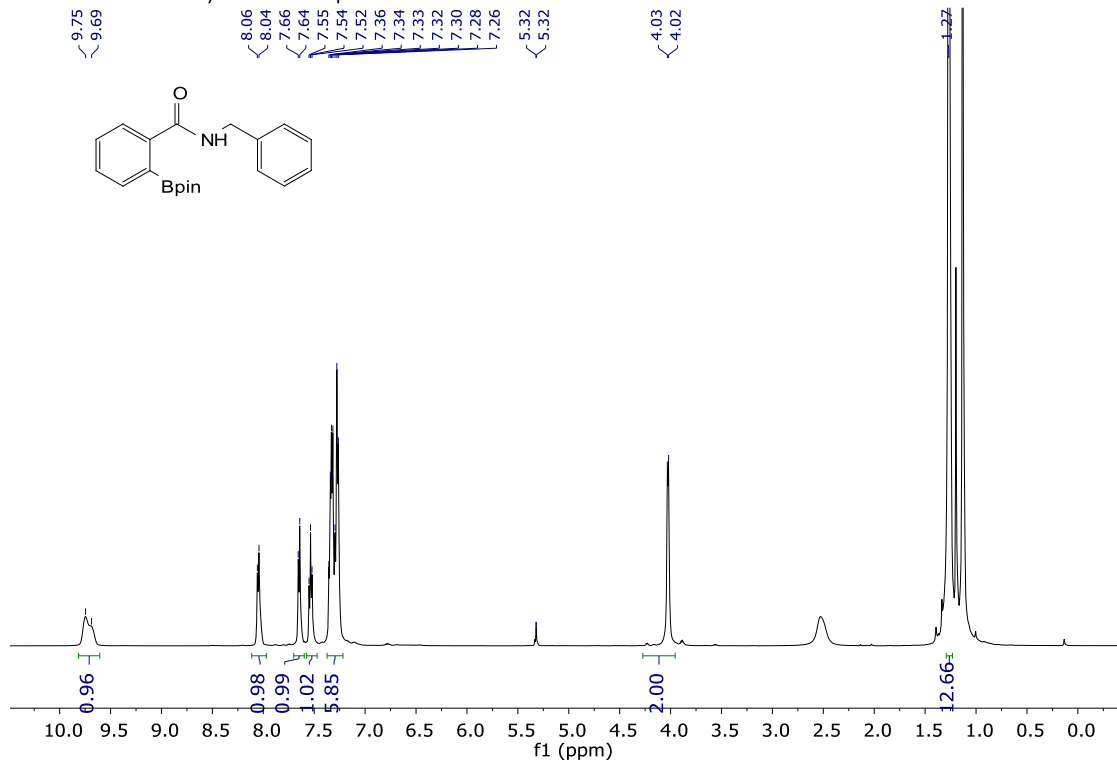Figure S95.  $^1\text{H}$  NMR spectra of the borylated aromatic amide **12so**

## SUPPORTING INFORMATION

SB-15-05-17-01-48h-column.2.ser — borylation

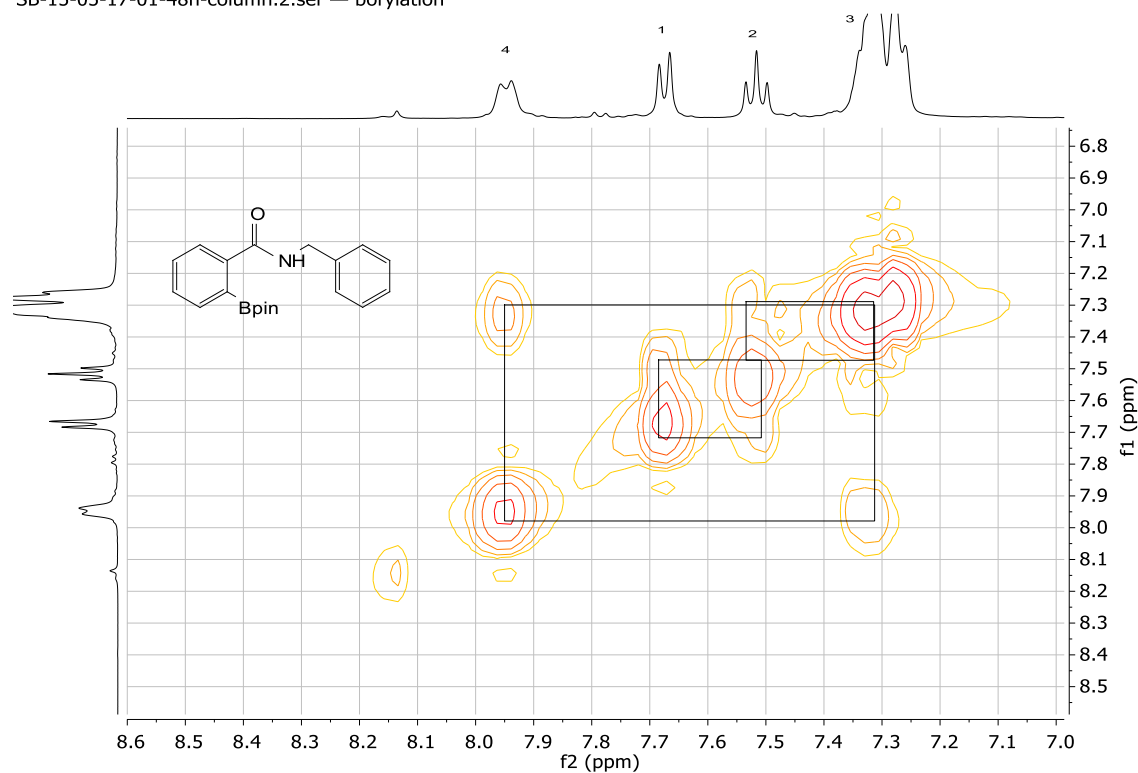Figure S96.  $^1\text{H}$ - $^1\text{H}$  COSY NMR spectra of the borylated aromatic amide **12so**SB-20-05-19-RP-benzylbenzamide-bpin-500M.2.fid —  $^{13}\text{C}$ 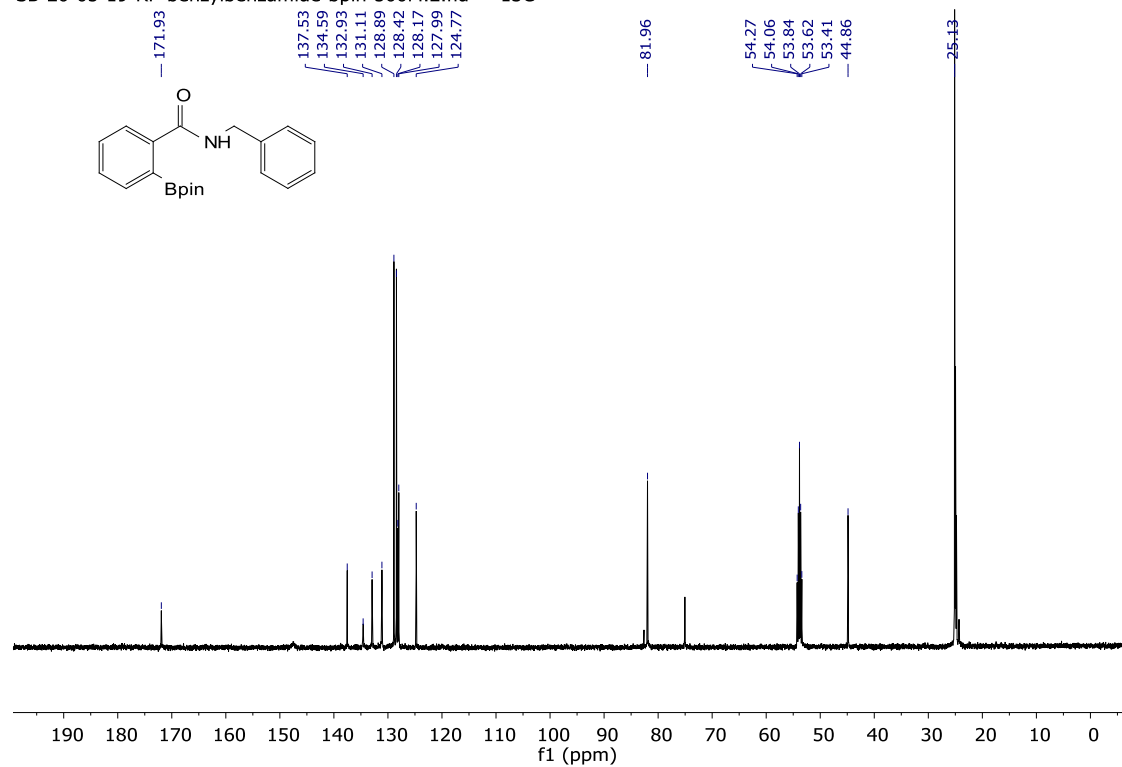Figure S97.  $^{13}\text{C}$  NMR spectra of borylated aromatic amide **12so**



## SUPPORTING INFORMATION

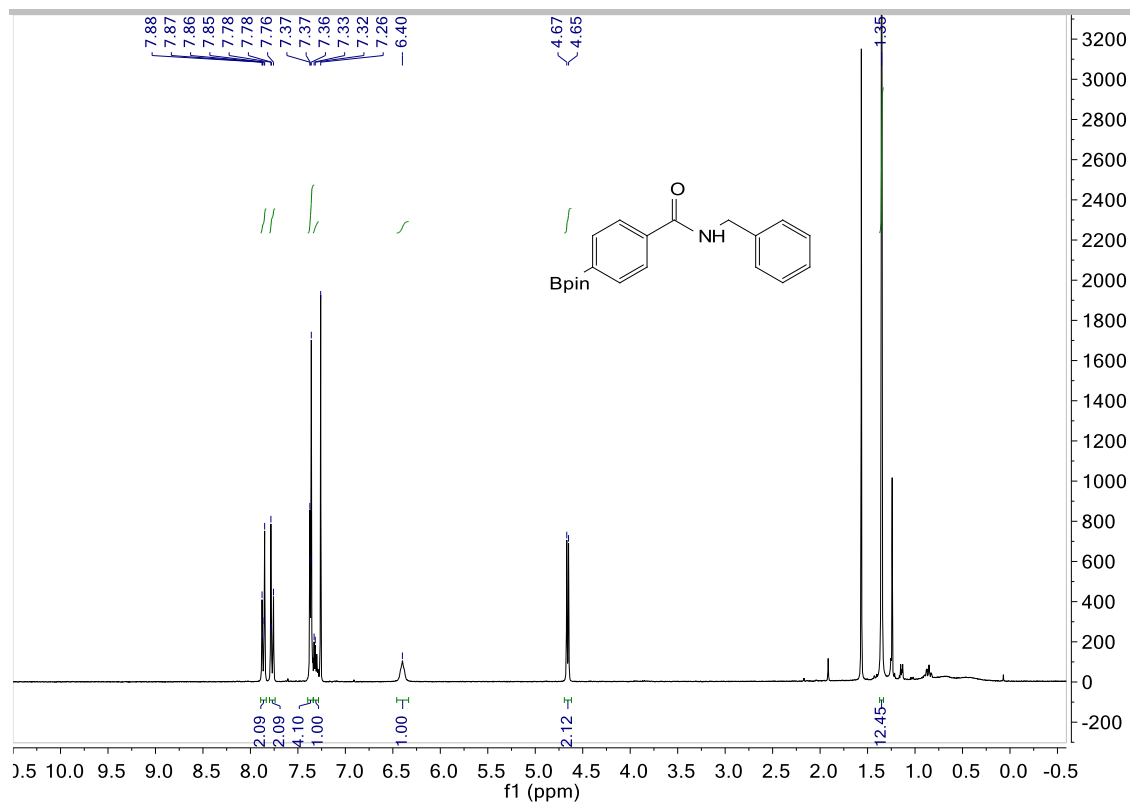Figure S100. <sup>1</sup>H NMR spectra of borylated aromatic amide **12sp**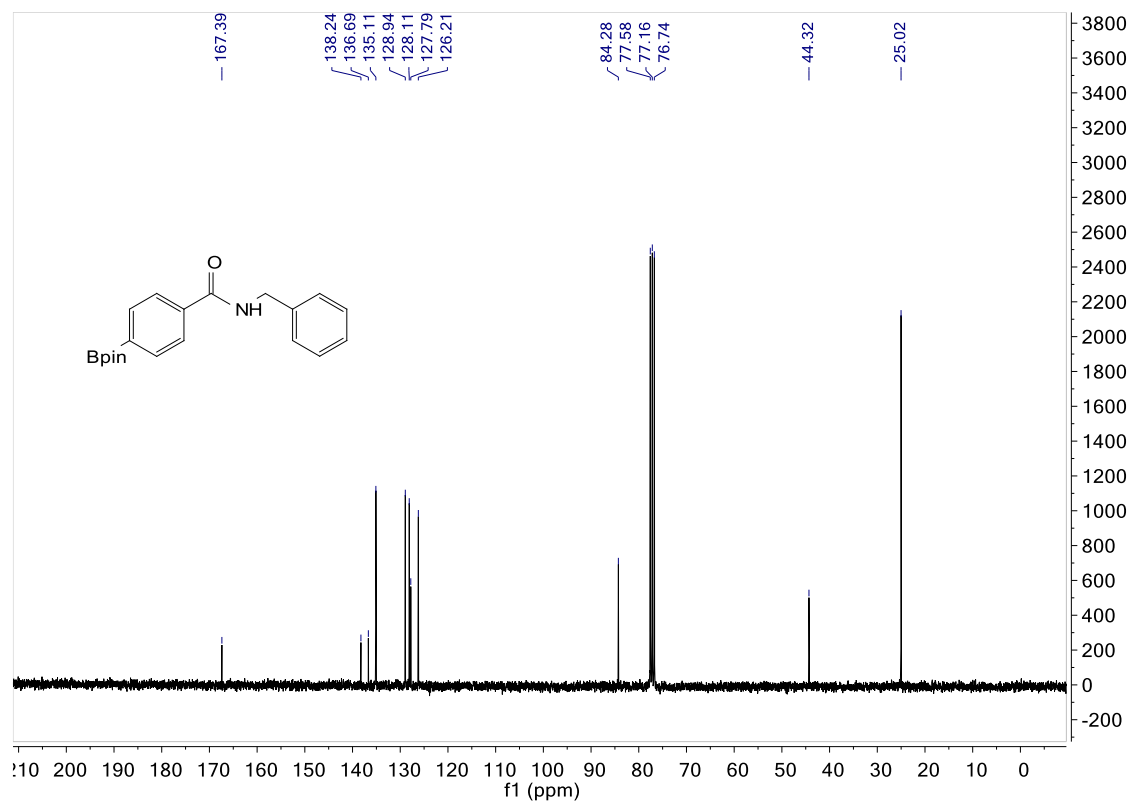Figure S101. <sup>13</sup>C NMR spectra of borylated aromatic amide **12sp**

## SUPPORTING INFORMATION

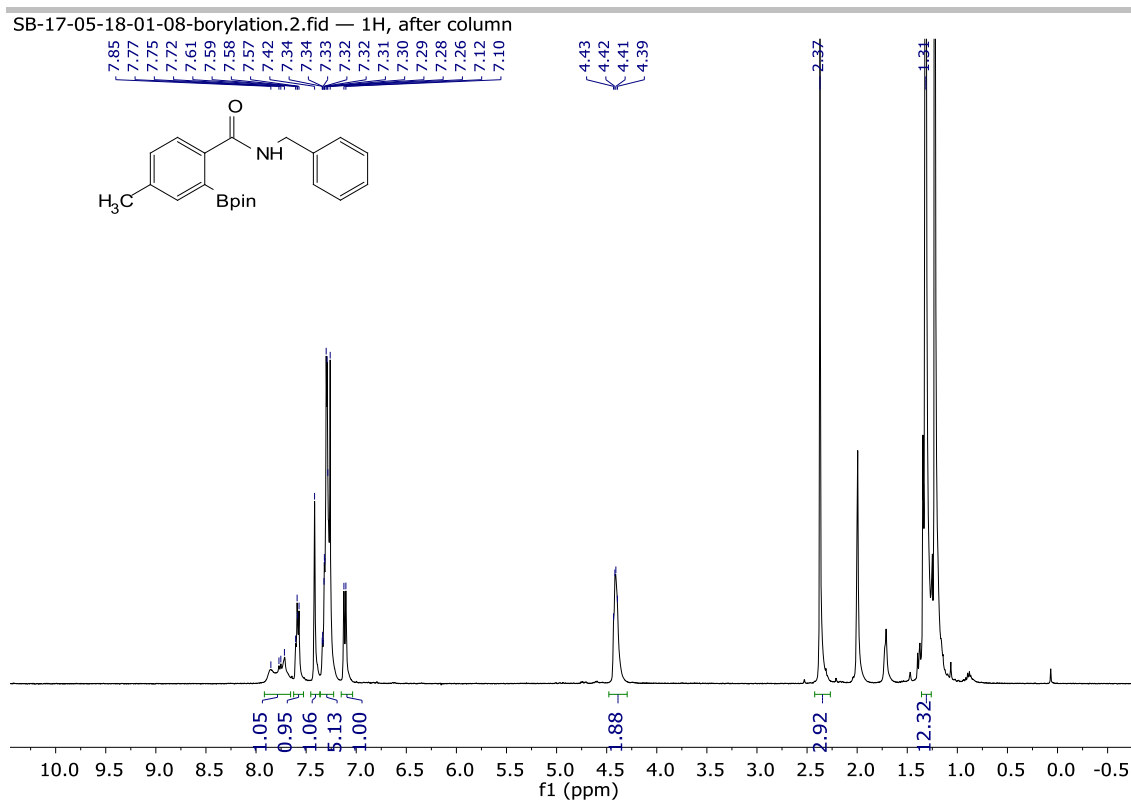Figure S102.  $^1\text{H}$  NMR spectra of borylated aromatic amide **13so**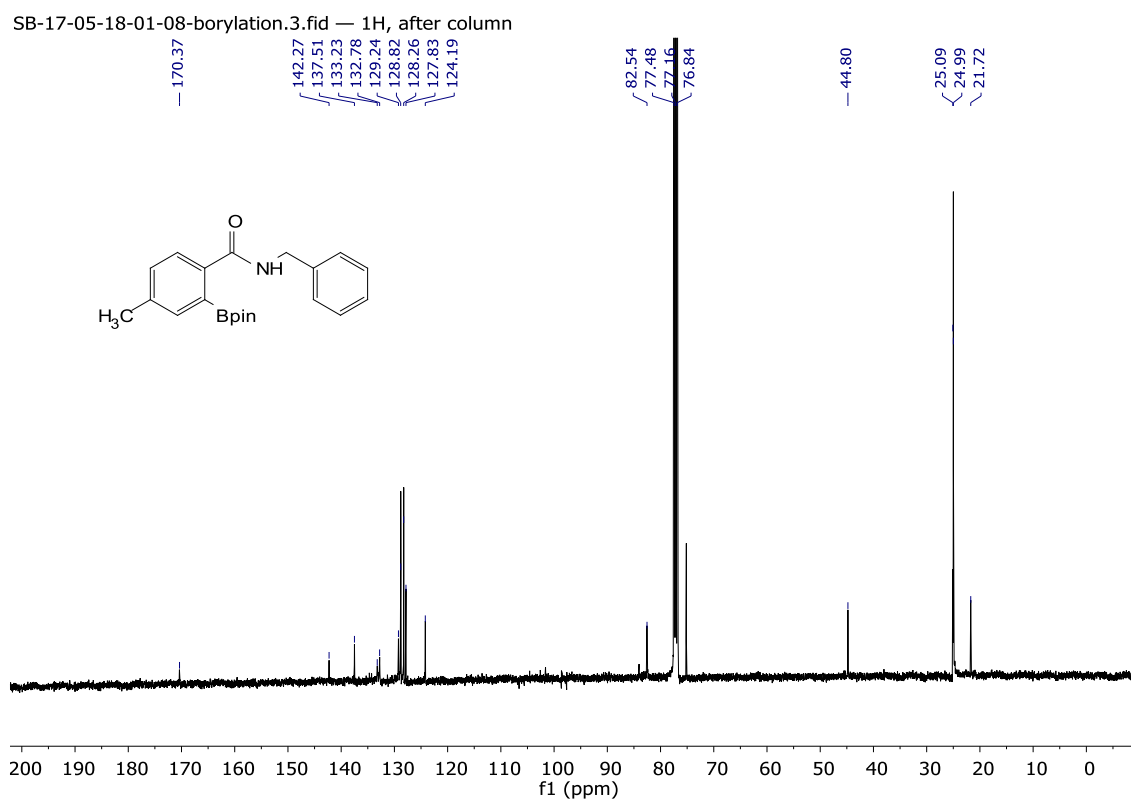Figure S103.  $^{13}\text{C}$  NMR spectra of borylated aromatic amide **13so**

## SUPPORTING INFORMATION

SB-1-09-18-03-500M.1.fid — 1H, meta-ome benzylbenzamide, H-bonds

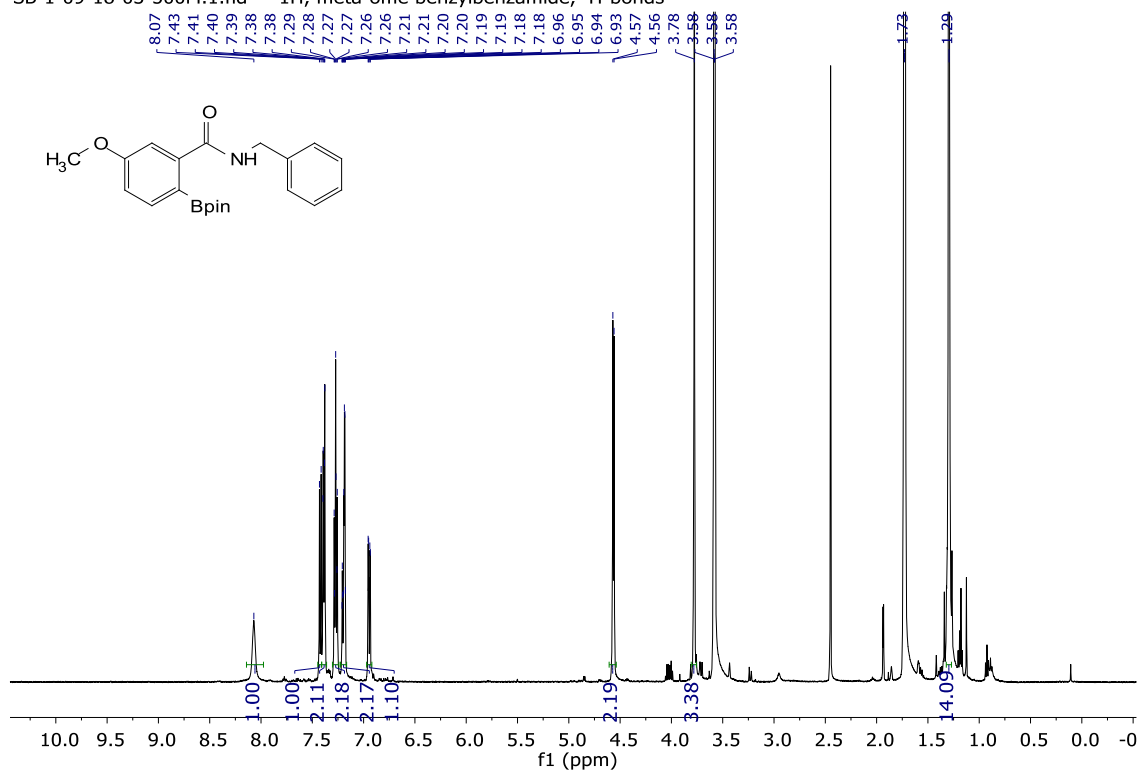Figure S104. <sup>1</sup>H NMR spectra of borylated aromatic amide **14so**

SB-1-09-18-03-500M.2.ser — 1H COSY, meta-ome benzylbenzamide, H-bonds

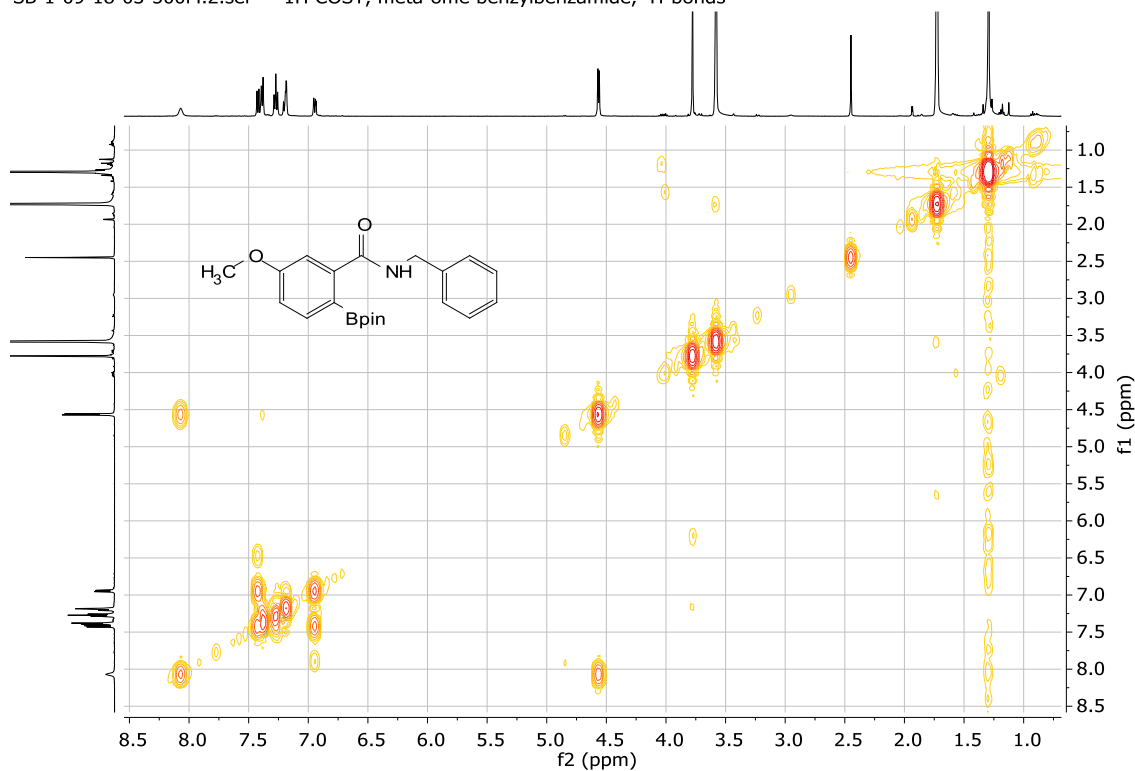Figure S105. <sup>1</sup>H-<sup>1</sup>H COSY NMR spectra of borylated aromatic amide **14so**

## SUPPORTING INFORMATION

SB-1-09-18-03-500M.3.fid — 1H COSY, meta-ome benzylbenzamide, H-bonds

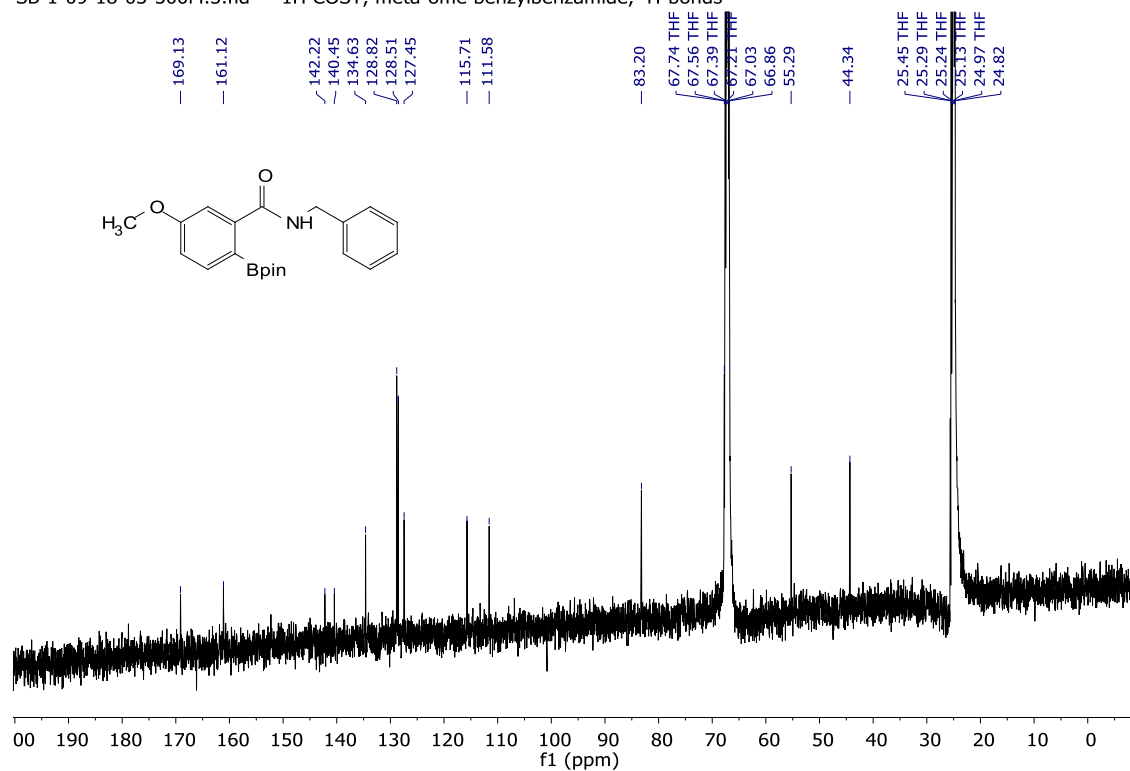Figure S106. <sup>13</sup>C NMR spectra of borylated aromatic amide **14so**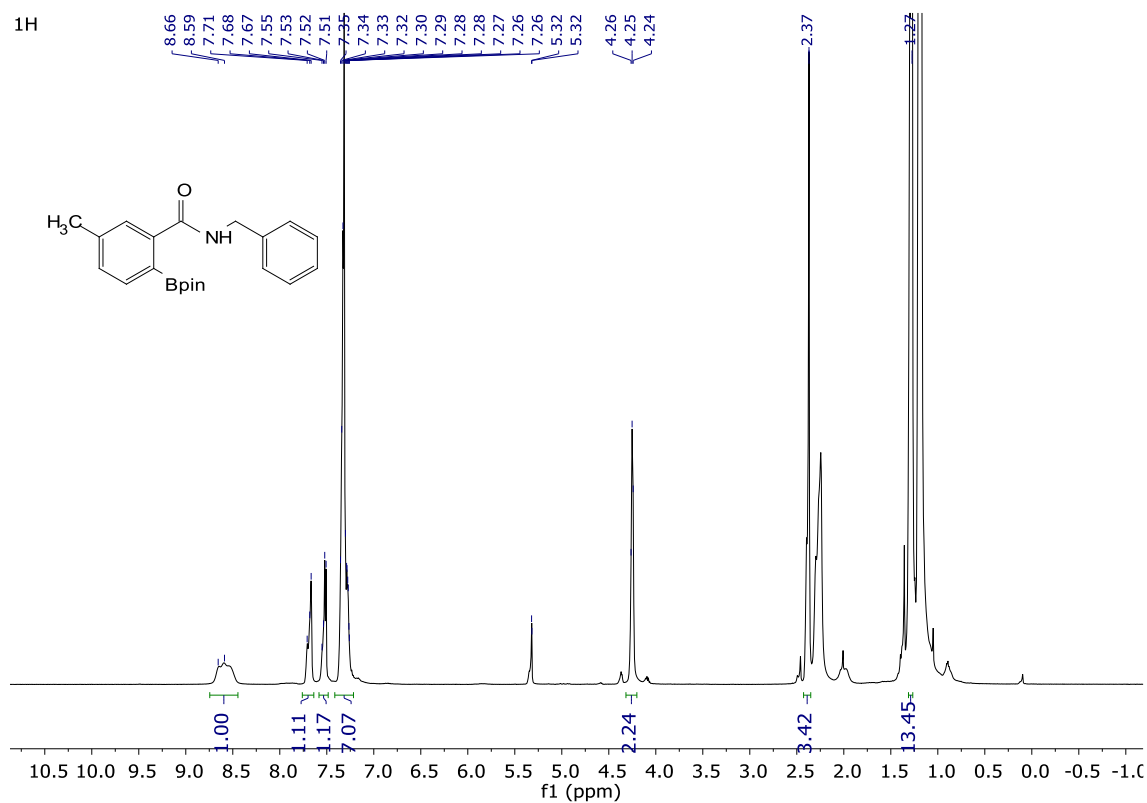Figure S107. <sup>1</sup>H NMR spectra of borylated aromatic amides **15so**

## SUPPORTING INFORMATION

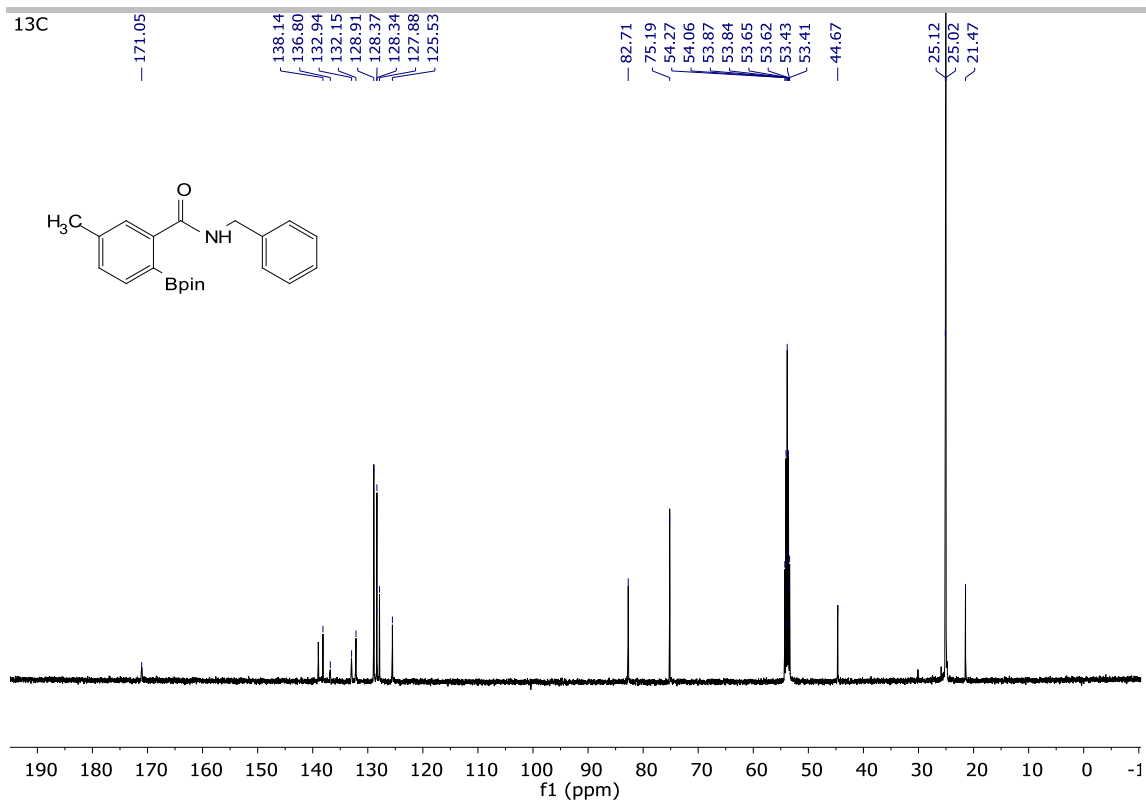Figure S108. <sup>13</sup>C NMR spectra of borylated aromatic amides **15so**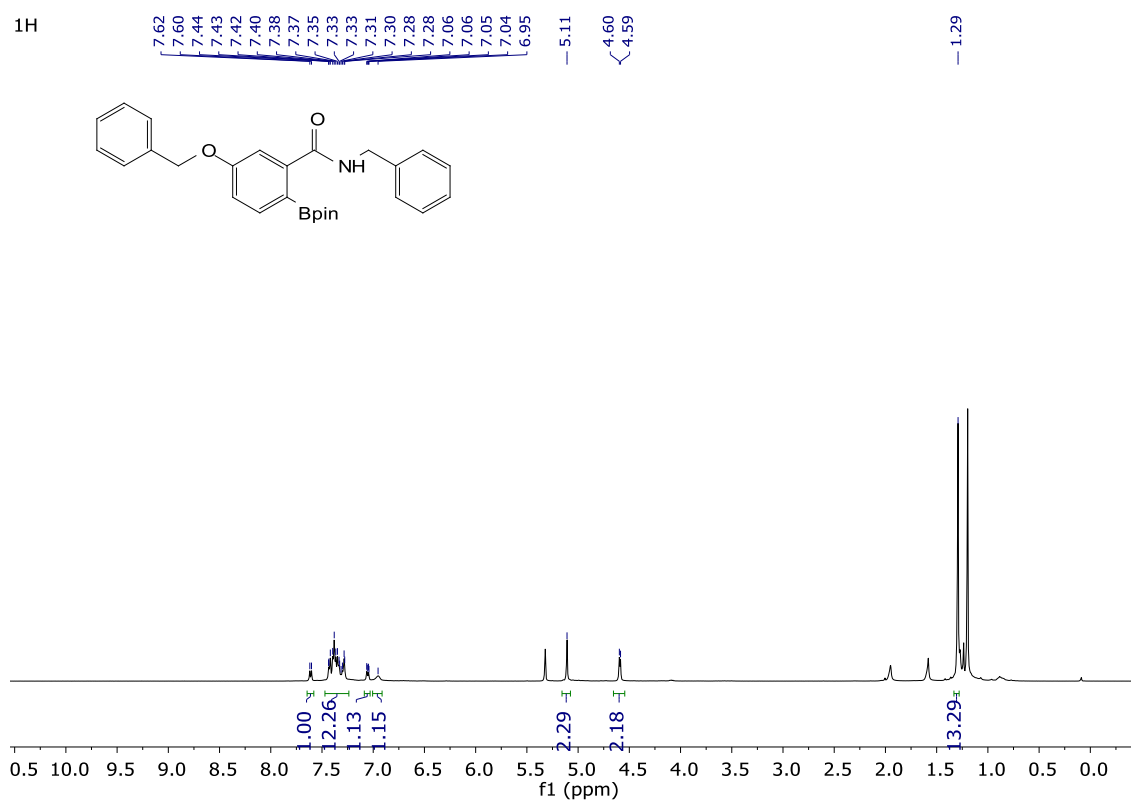Figure S109. <sup>1</sup>H NMR spectra of borylated aromatic amides **16so**



## SUPPORTING INFORMATION

13C

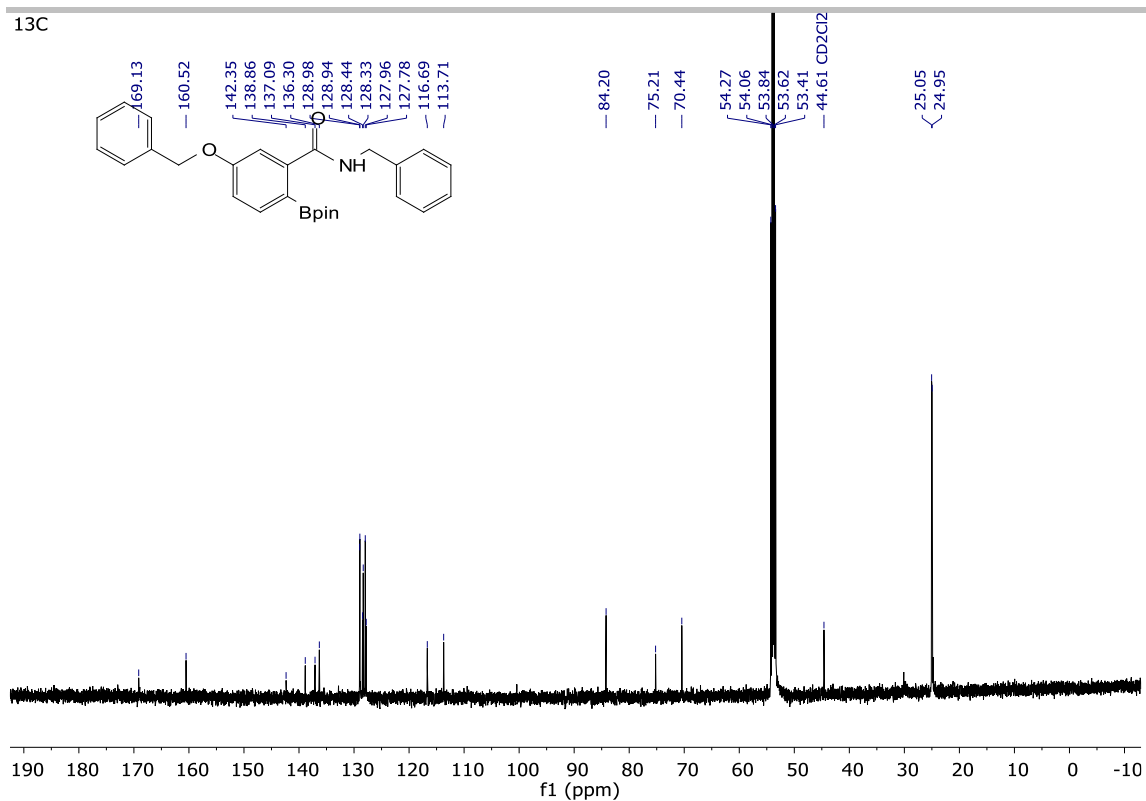Figure S110.  $^{13}\text{C}$  NMR spectra of borylated aromatic amides **16so**

1H

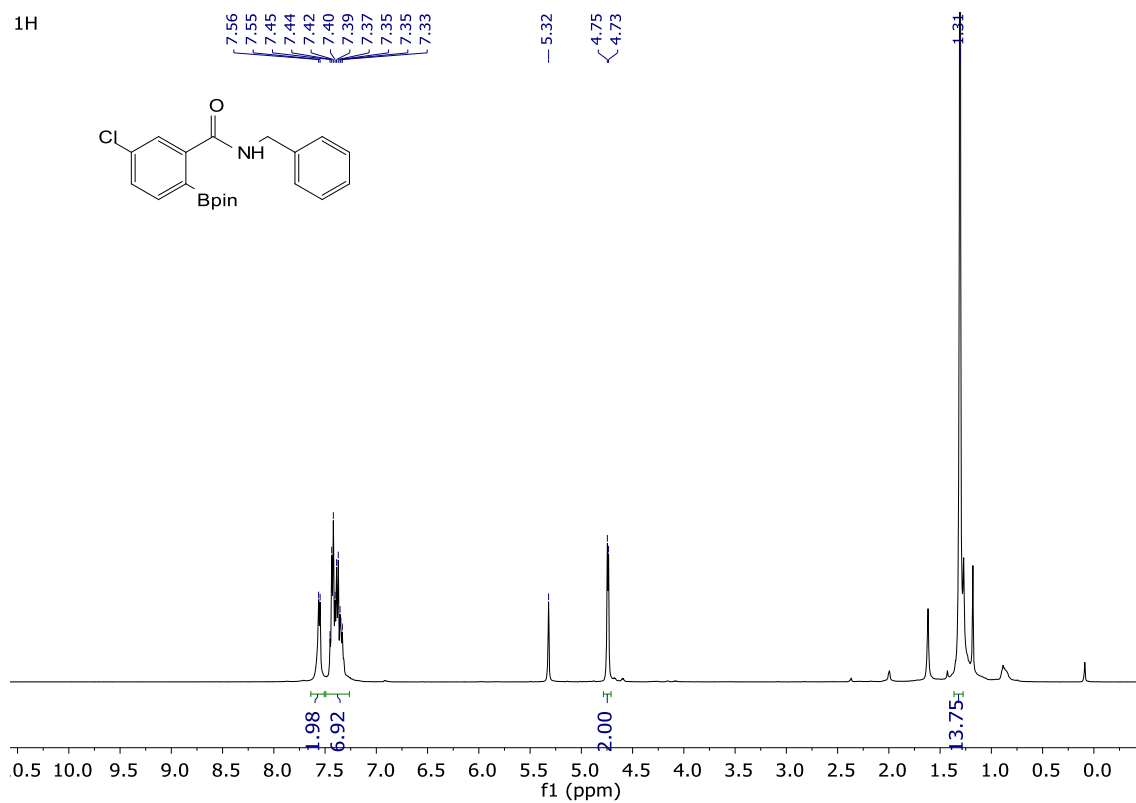Figure S111.  $^1\text{H}$  NMR spectra of borylated aromatic amides **17so**

## SUPPORTING INFORMATION

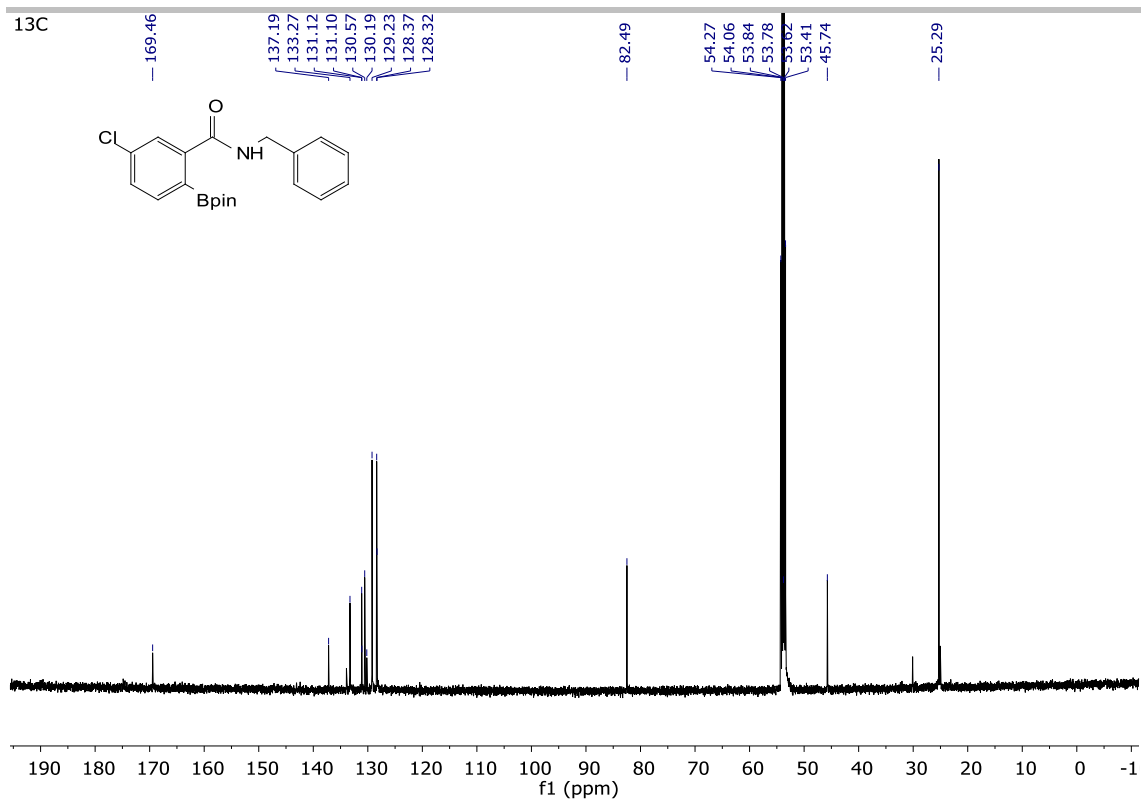Figure S112. <sup>13</sup>C NMR spectra of borylated aromatic amides **17so**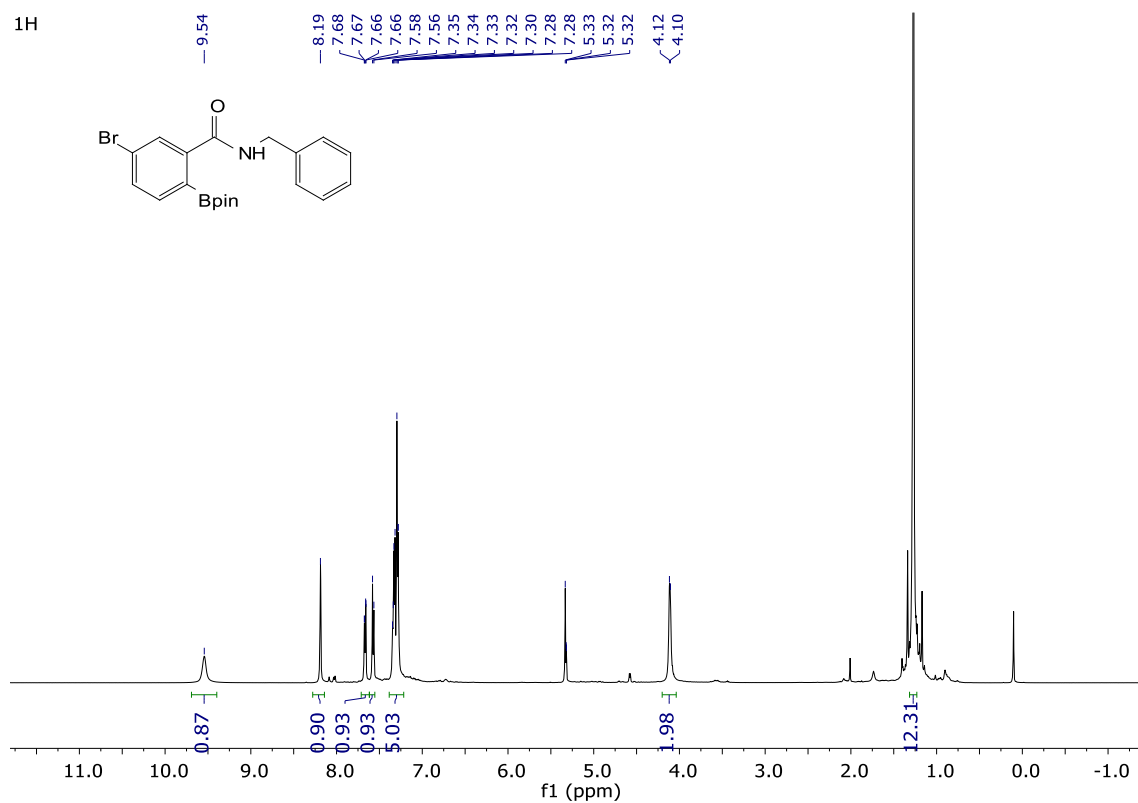Figure S113. <sup>1</sup>H NMR spectra of borylated aromatic amides **18so**

## SUPPORTING INFORMATION

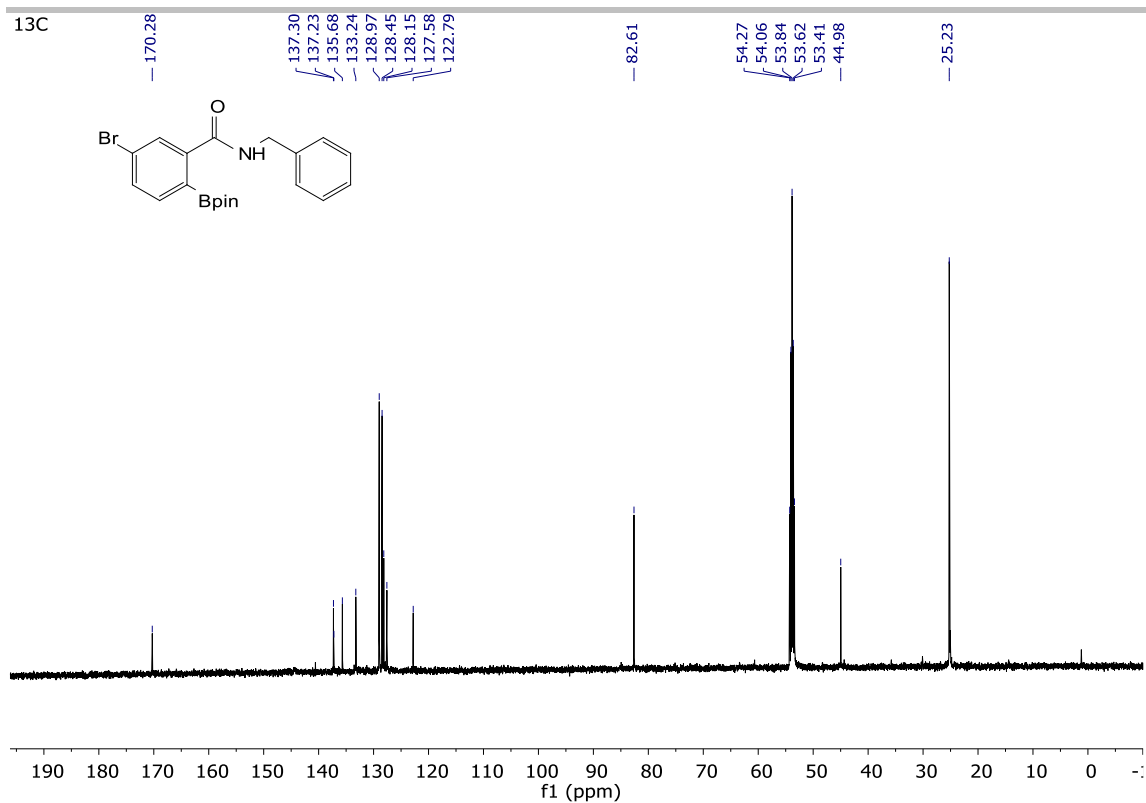Figure S114.  $^{13}\text{C}$  NMR spectra of borylated aromatic amides **18so**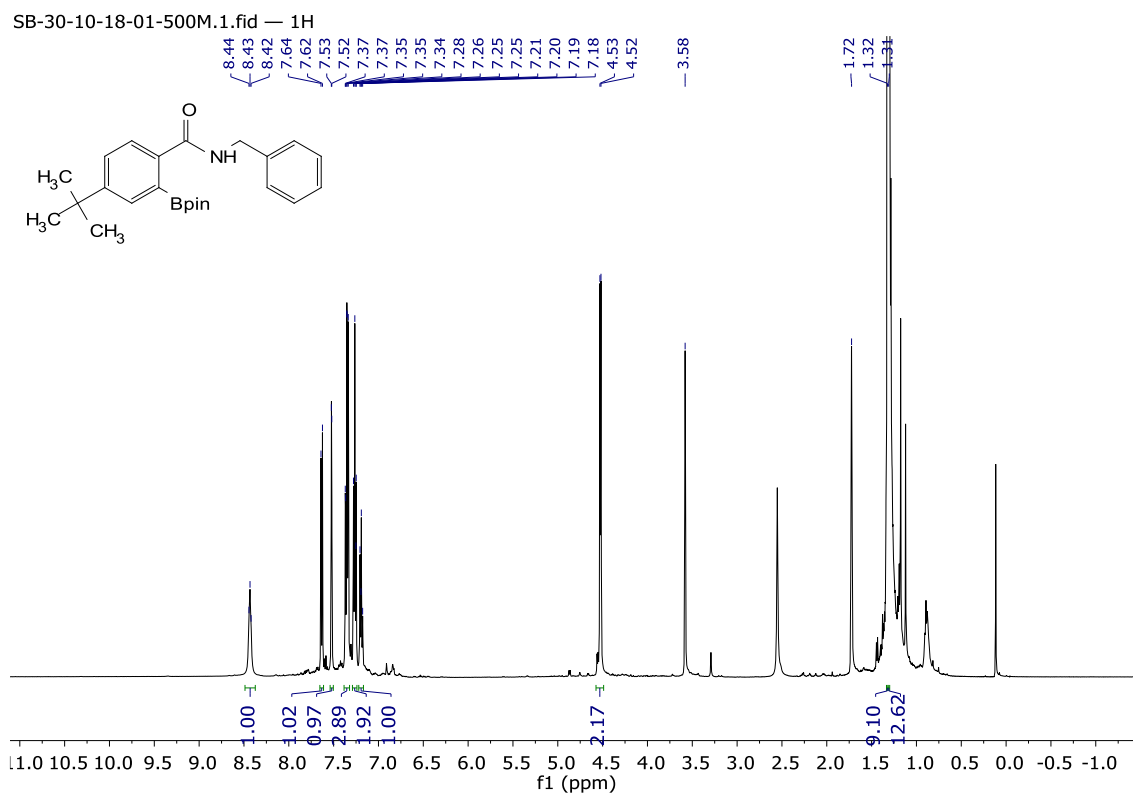Figure S115.  $^1\text{H}$  NMR spectra of borylated aromatic amide **19so**

## SUPPORTING INFORMATION

SB-30-10-18-01-500M.2.ser — 1HCOSY

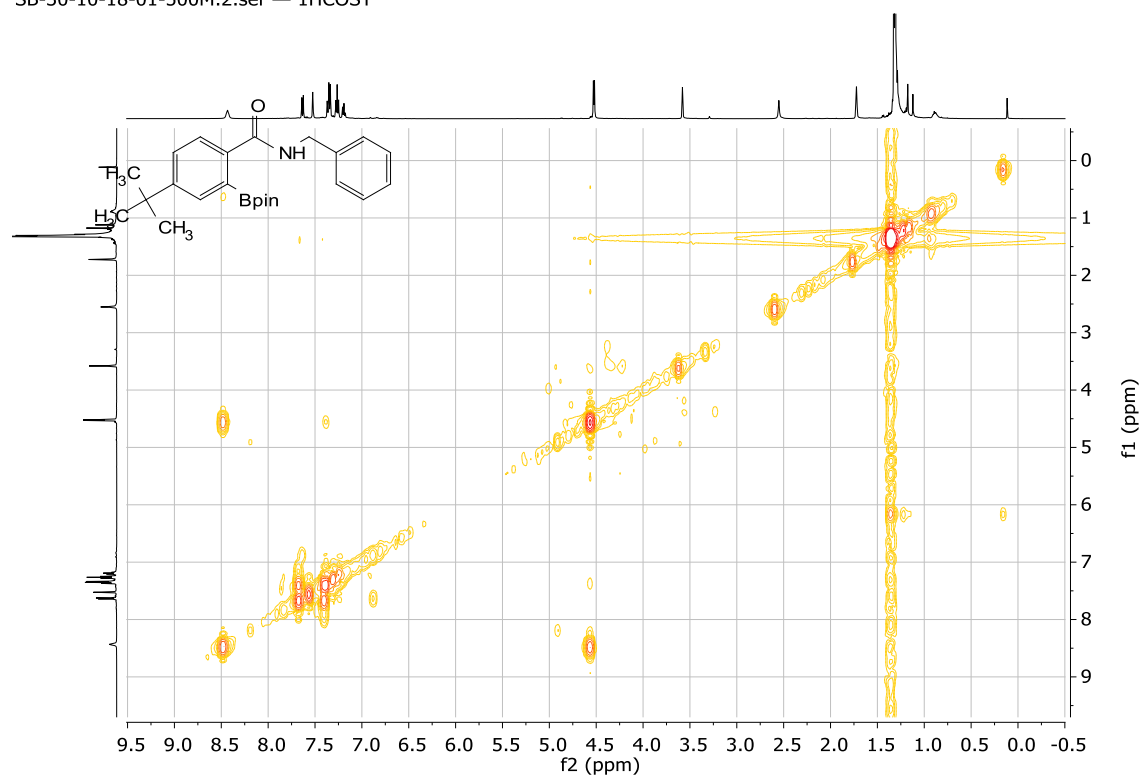Figure S116. <sup>1</sup>H-<sup>1</sup>H COSY NMR spectra of borylated aromatic amide **19so**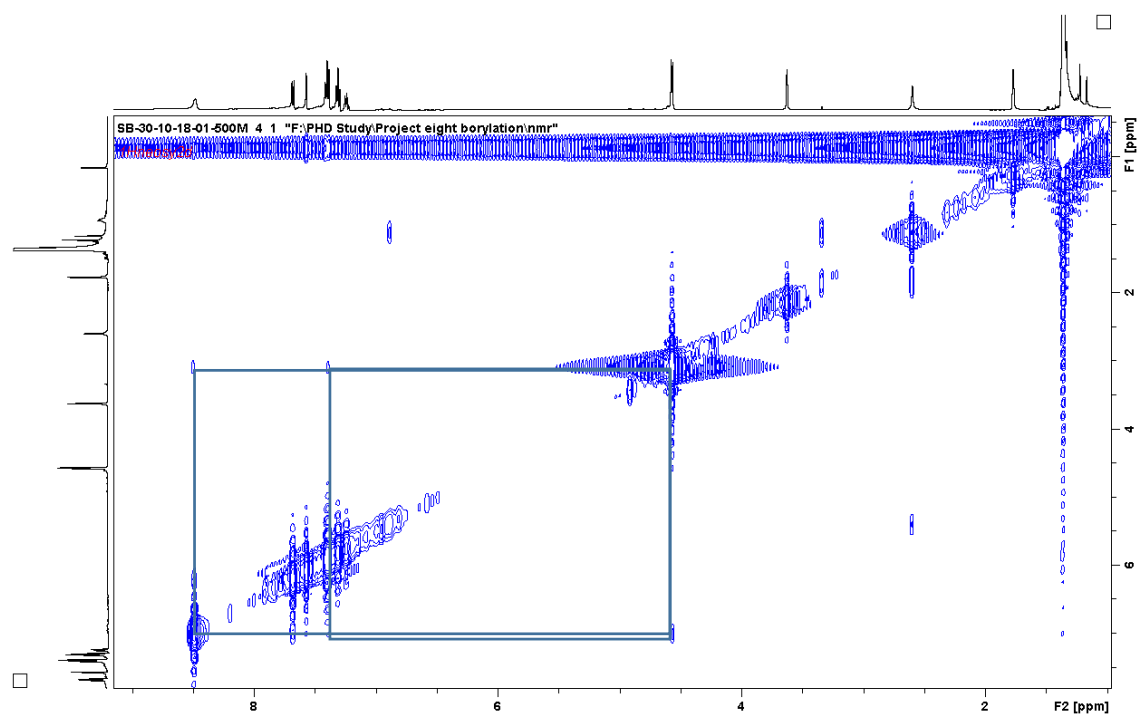Figure S117. <sup>1</sup>H-<sup>1</sup>H NOESY NMR spectra of borylated aromatic amide **19so**

## SUPPORTING INFORMATION

SB-30-10-18-01-500M.3.fid — 13C

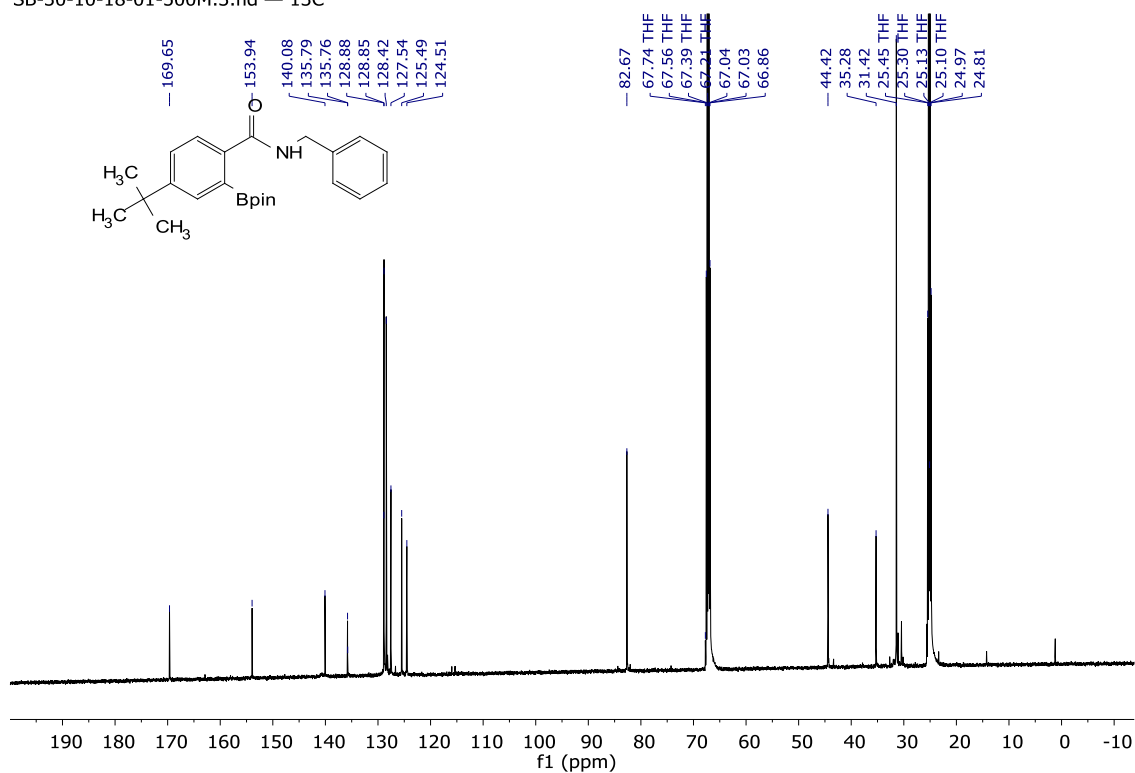Figure S118. <sup>13</sup>C NMR spectra of borylated aromatic amide **19so**SB-17-05-18-01-07-500M.4.fid — <sup>1</sup>H, para-ocf3 benzamide, H-bonds, repu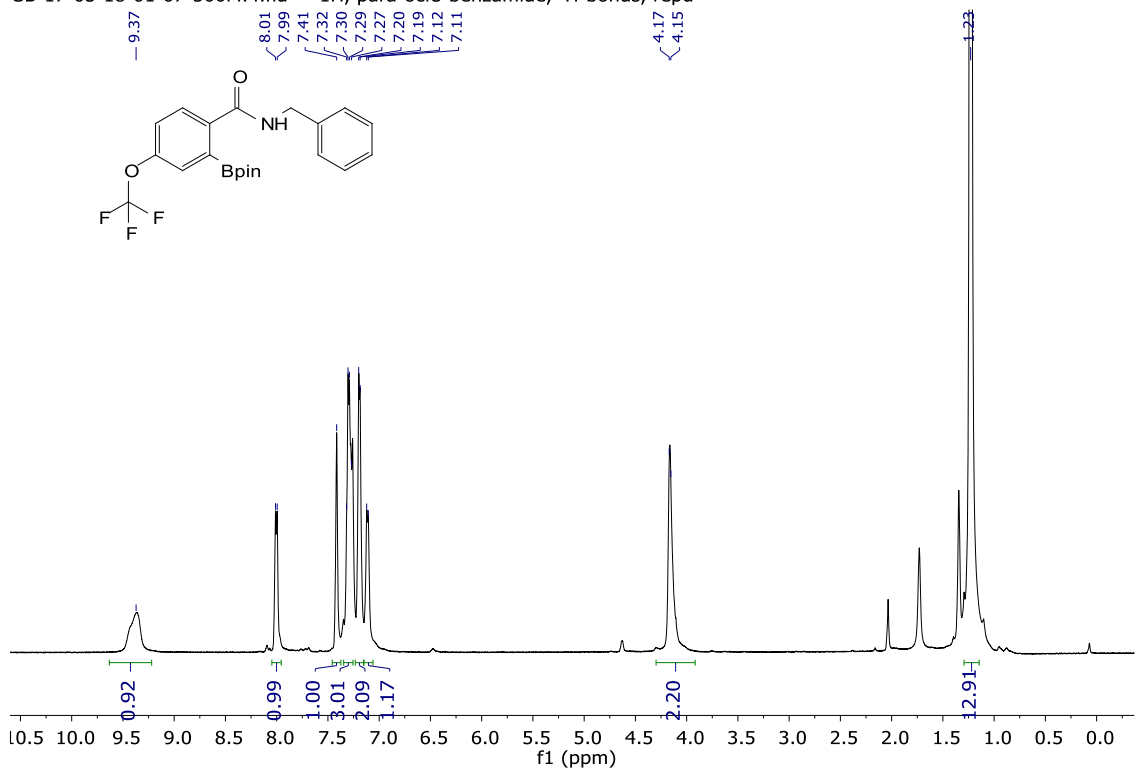Figure S119. <sup>1</sup>H NMR spectra of borylated aromatic amide **20so**

## SUPPORTING INFORMATION

SB-17-05-18-01-07-500M.5.ser — <sup>1</sup>H, para-ocf3 benzamide, H-bonds, repu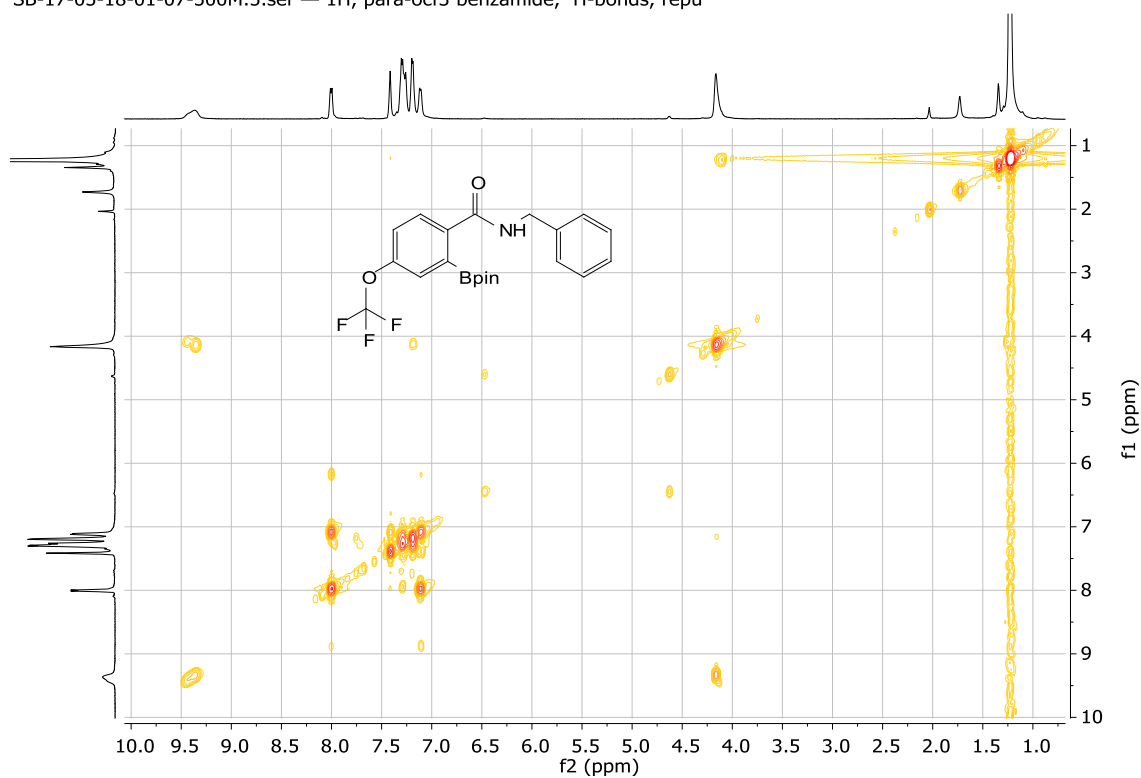Figure S120. <sup>1</sup>H-<sup>1</sup>H COSY NMR spectra of borylated aromatic amide **20so**SB-17-05-18-01-07-500M.6.fid — <sup>13</sup>C, para-ocf3 benzamide, H-bonds, work-up, repu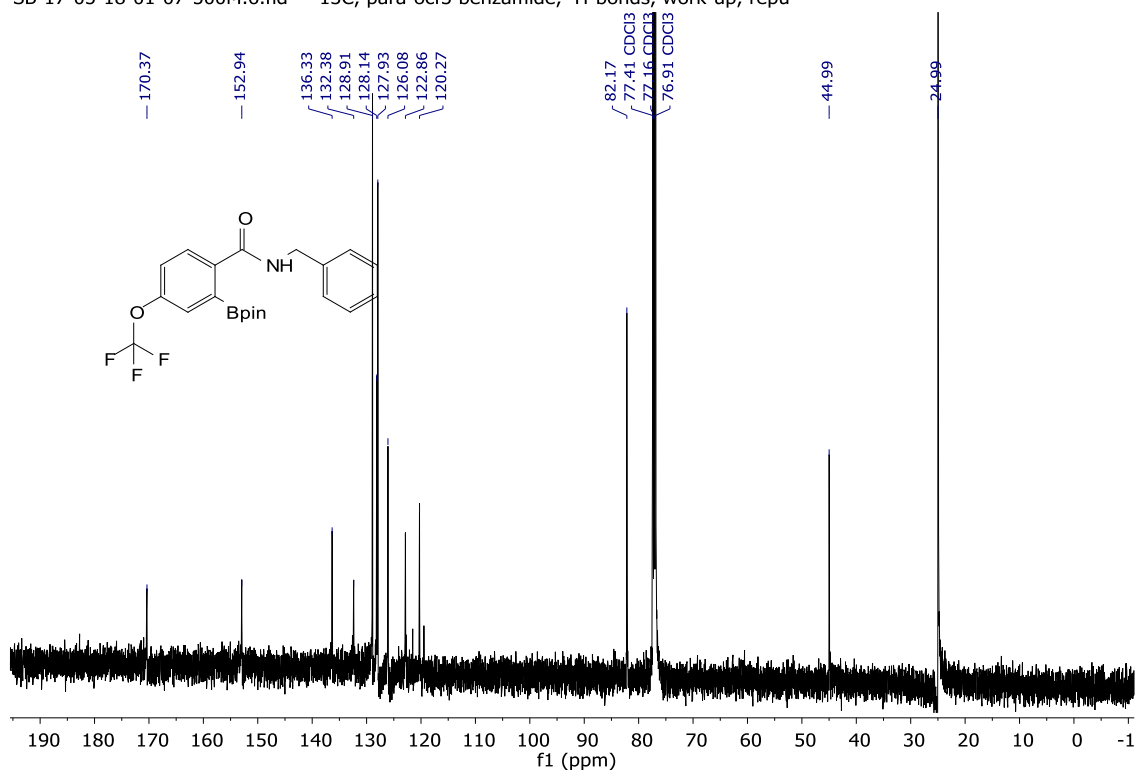Figure S121. <sup>13</sup>C NMR spectra of borylated aromatic amide **20so**

## SUPPORTING INFORMATION

SB-21-5-RP-para-methoxyl-bpin.1.fid — 1H

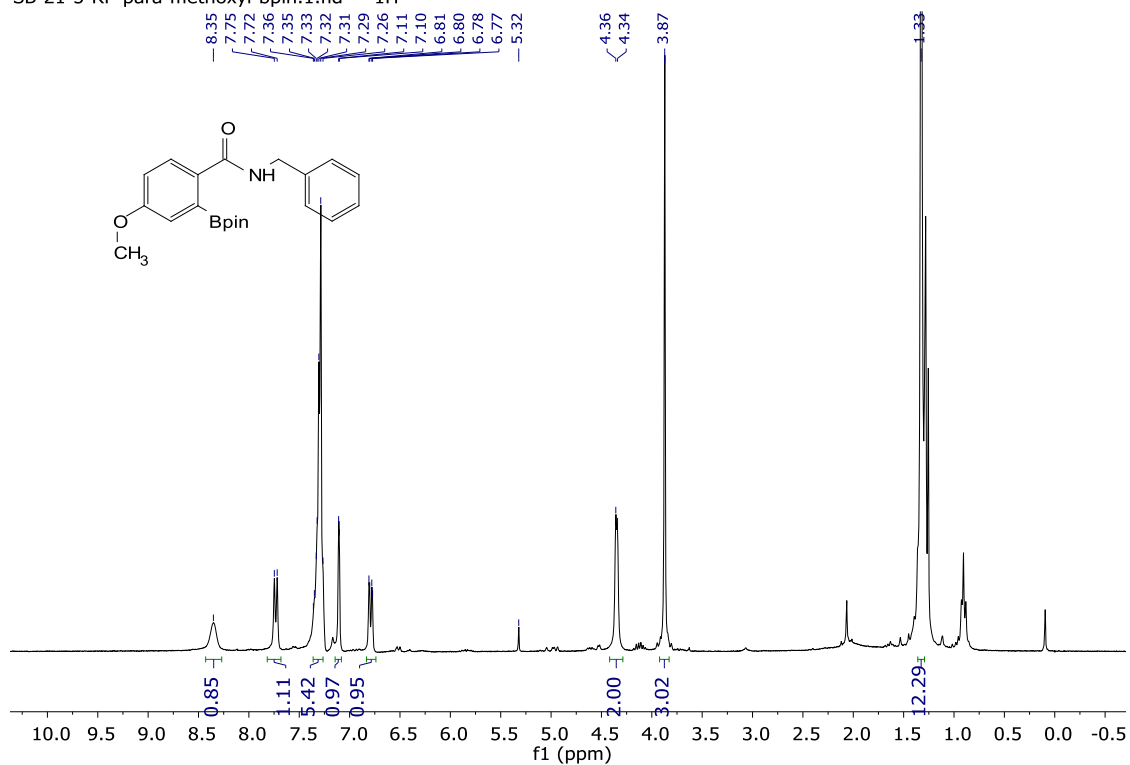Figure S122. <sup>1</sup>H NMR spectra of borylated aromatic amide **21so**

SB-24-08-18-01-500M.2.ser — 1H COSY, para-methoxy benzylbenzamide, H-bonds

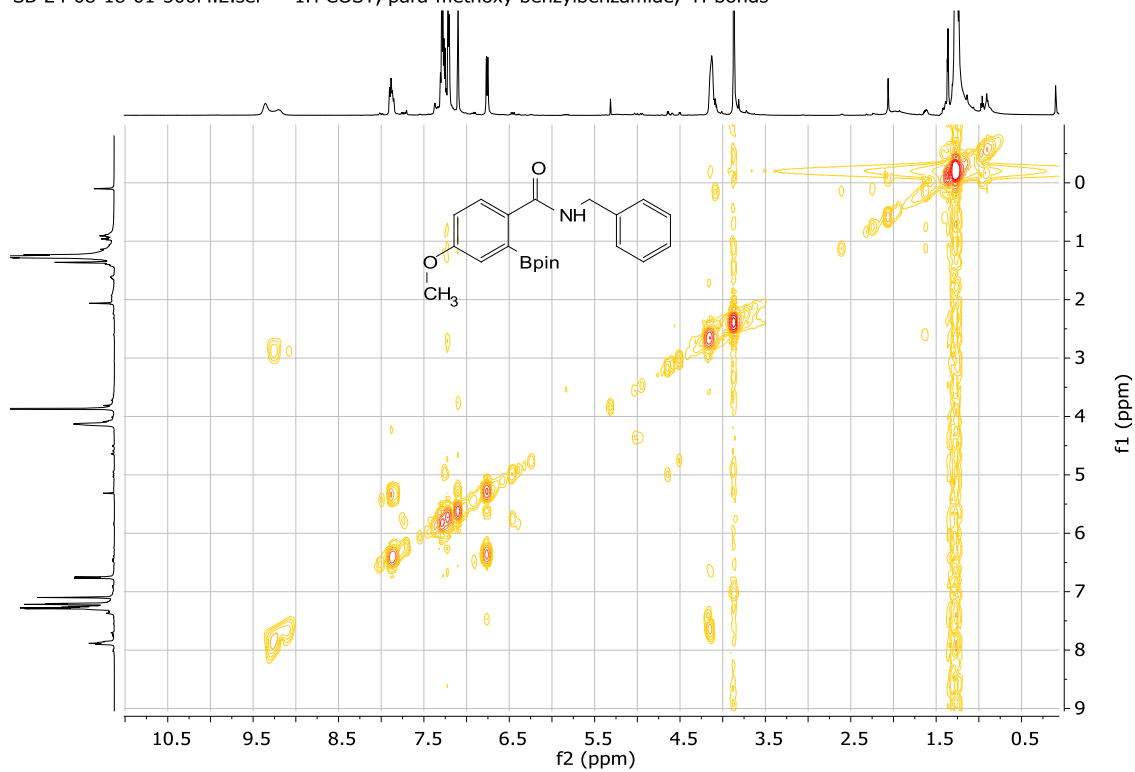Figure S123. <sup>1</sup>H-<sup>1</sup>H COSY NMR spectra of borylated aromatic amide **21so**

## SUPPORTING INFORMATION

SB-21-5-RP-para-methoxy-bpin.2.fid — 13C

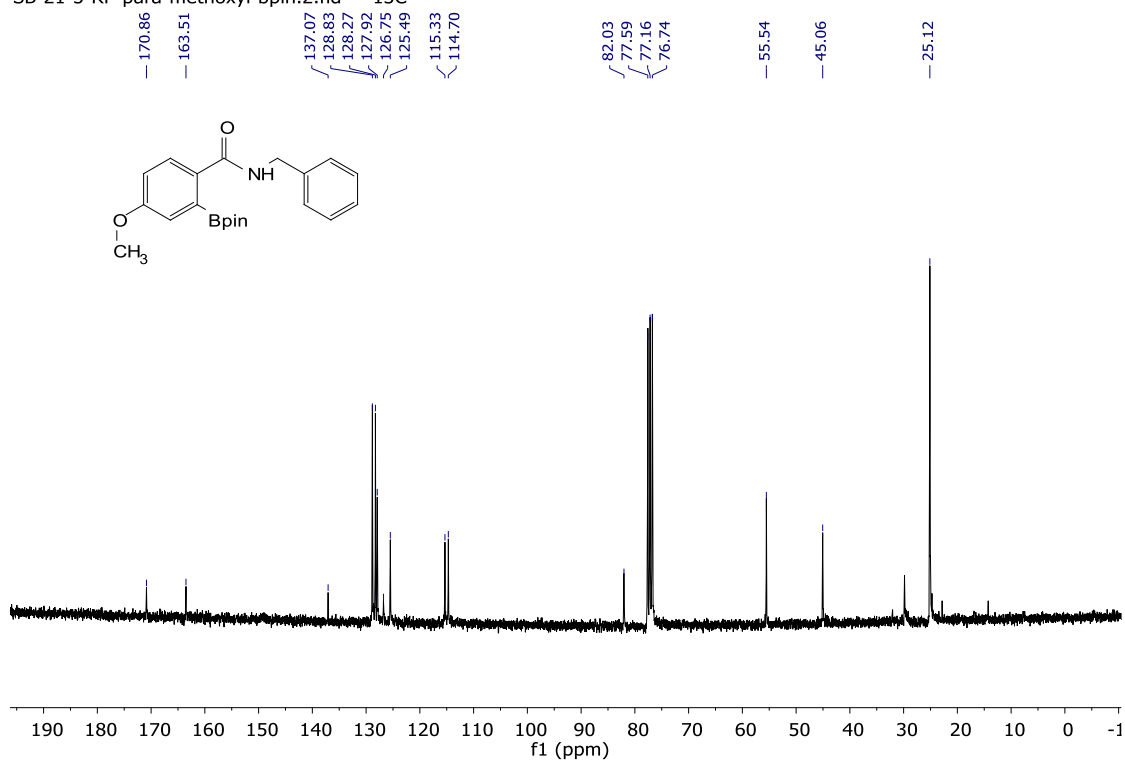Figure S124. <sup>13</sup>C NMR spectra of borylated aromatic amide **21so**

SB-28-04-18-01-02-500M.1.fid — 1H

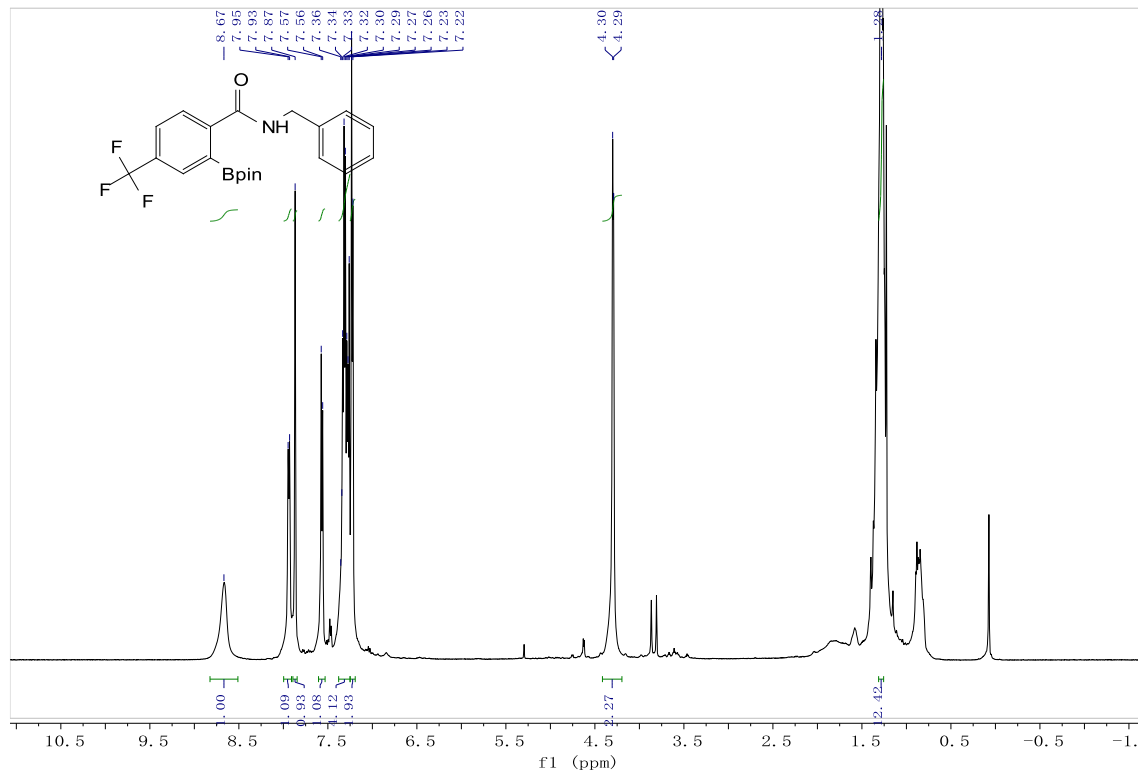Figure S125. <sup>1</sup>H NMR spectra of borylated aromatic amide **22so**



## SUPPORTING INFORMATION

SB-28-04-18-01-02-500M. 2. ser — 1H-cosy

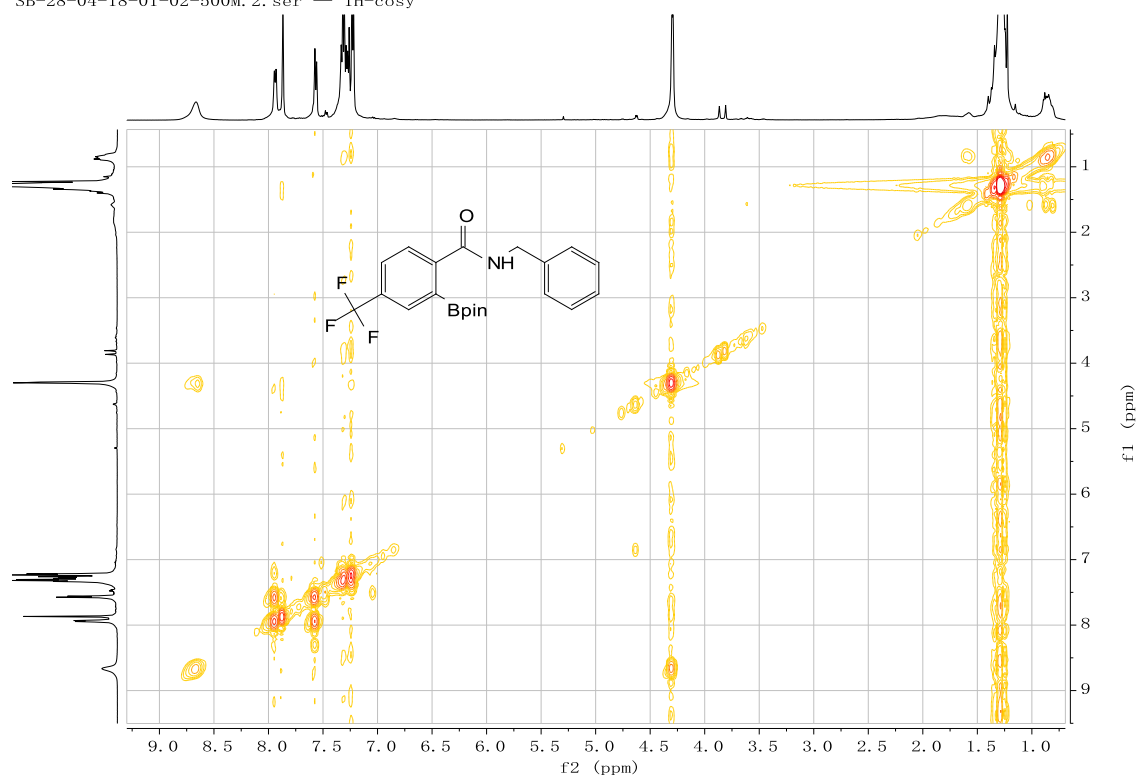SB-28-04-18-01-02-500M. 3. fid —  $^{13}\text{C}$ 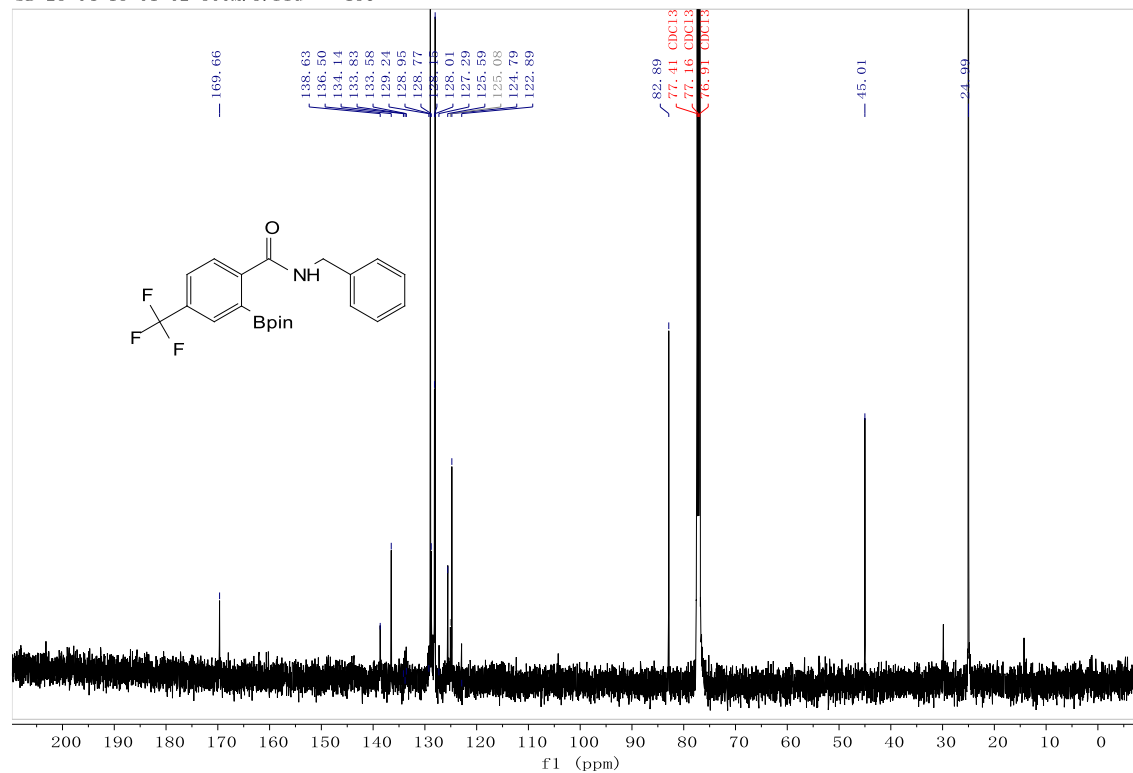

## SUPPORTING INFORMATION

SB-24-08-18-02-500M.5.fid — <sup>1</sup>H, para-cl benzylbenzamide, H-bonds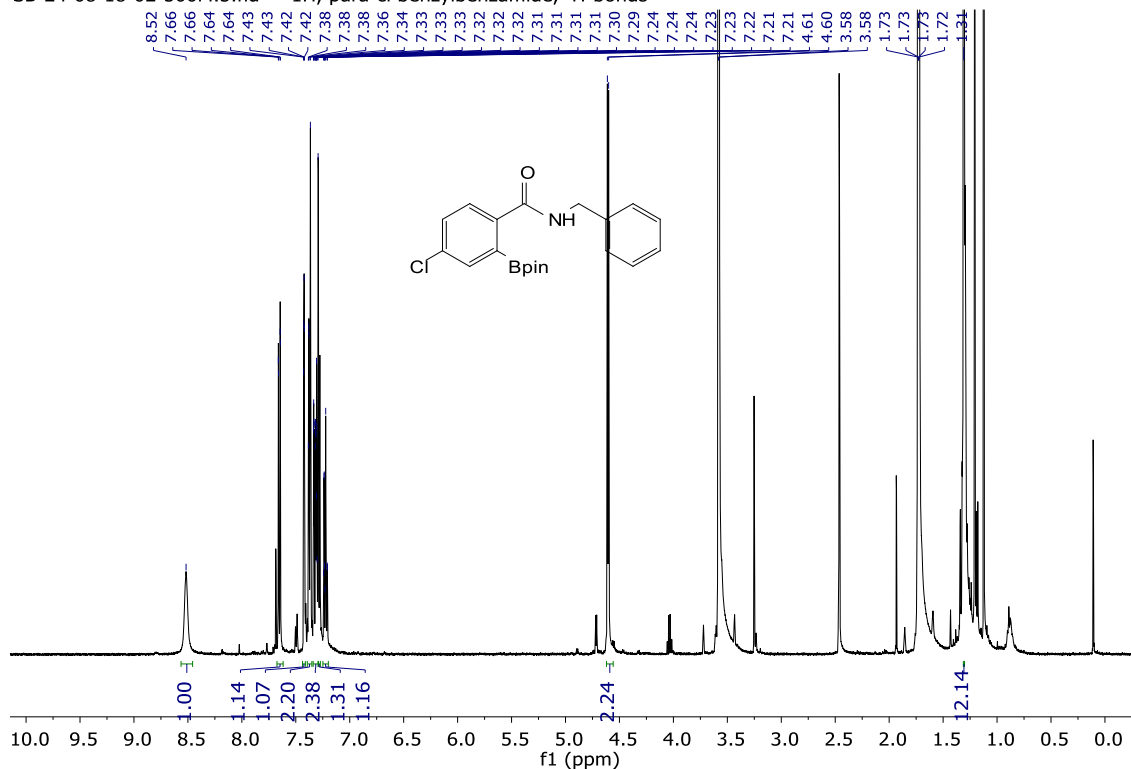Figure S128. <sup>1</sup>H NMR spectra of borylated aromatic amide **23so**SB-24-08-18-02-500M.6.ser — <sup>1</sup>H COSY, para-cl benzylbenzamide, H-bonds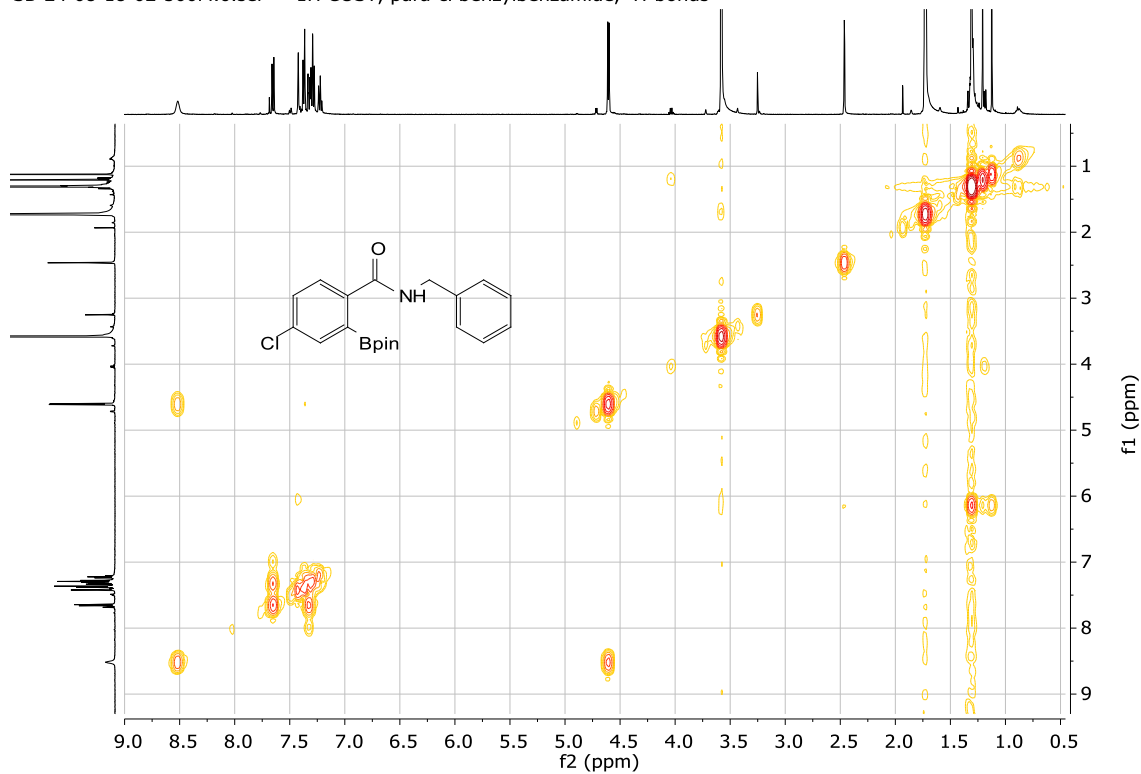Figure S129. <sup>1</sup>H-<sup>1</sup>H COSY NMR spectra of borylated aromatic amide **23so**

## SUPPORTING INFORMATION

SB-24-08-18-02-500M.7.fid — <sup>13</sup>C, para-cl benzylbenzamide, H-bonds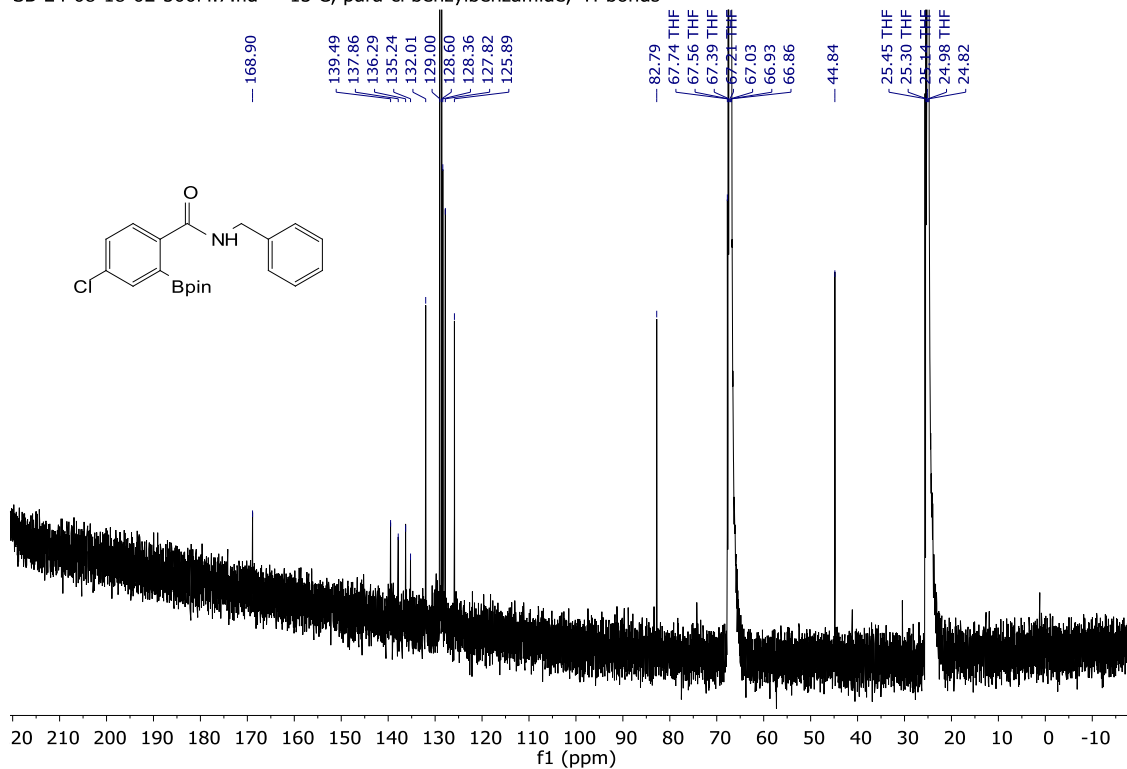Figure S130. <sup>13</sup>C NMR spectra of borylated aromatic amide **23so**SB-1-09-18-02-500M.1.fid — <sup>1</sup>H, para-Br benzylbenzamide, H-bonds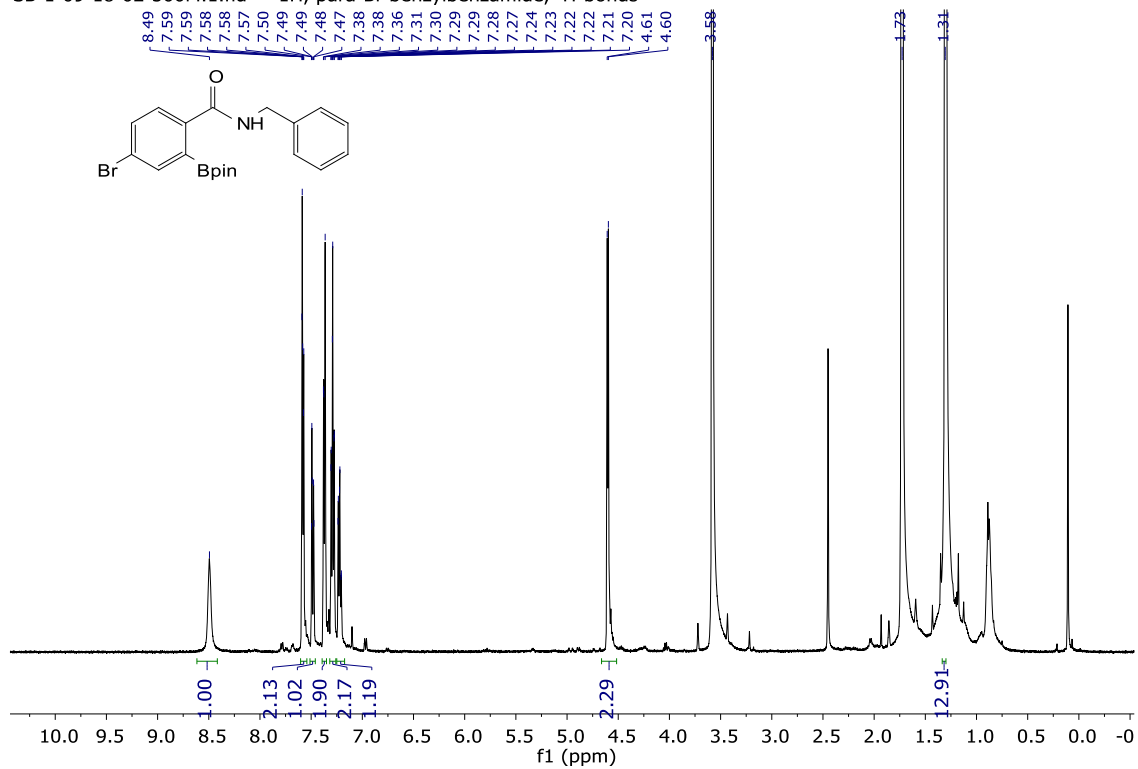Figure S131. <sup>1</sup>H NMR spectra of borylated aromatic amide **24so**

## SUPPORTING INFORMATION

SB-1-09-18-02-500M.2.ser —  $^1\text{H}$  COSY, para-Br benzylbenzamide, H-bonds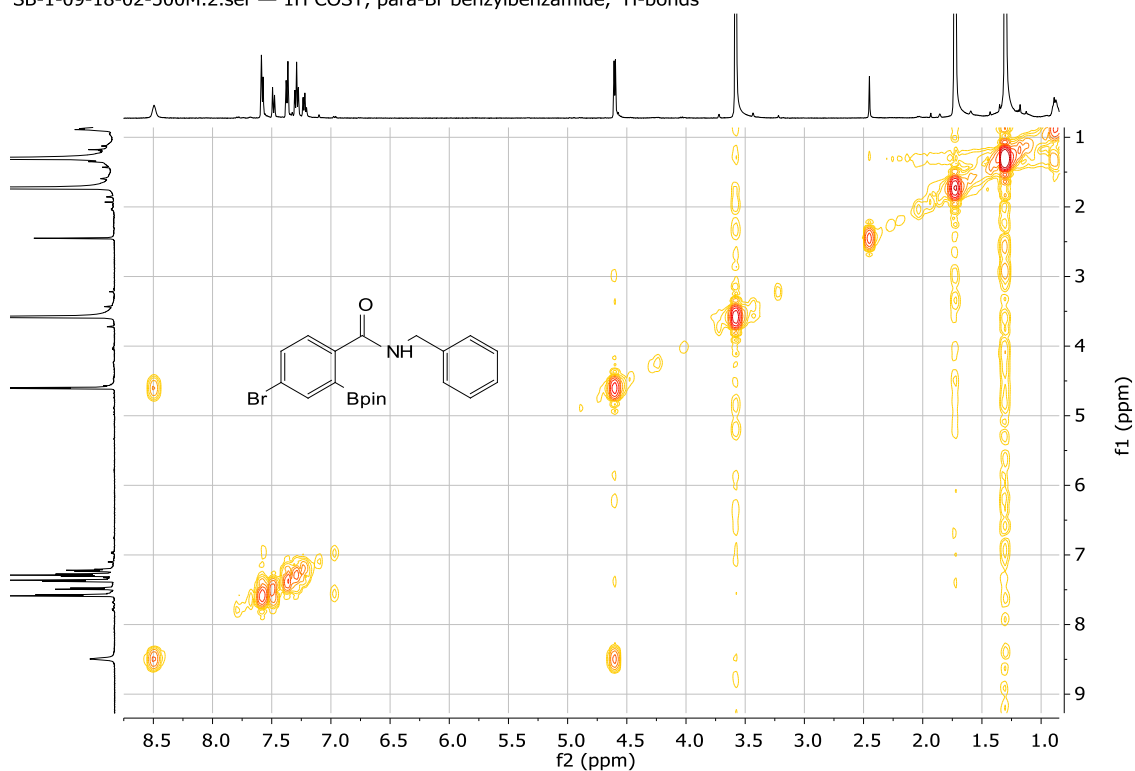Figure S132.  $^1\text{H}$ - $^1\text{H}$  COSY NMR spectra of borylated aromatic amide **24so**SB-1-09-18-02-500M.3.fid —  $^1\text{H}$ , para-Br benzylbenzamide, H-bonds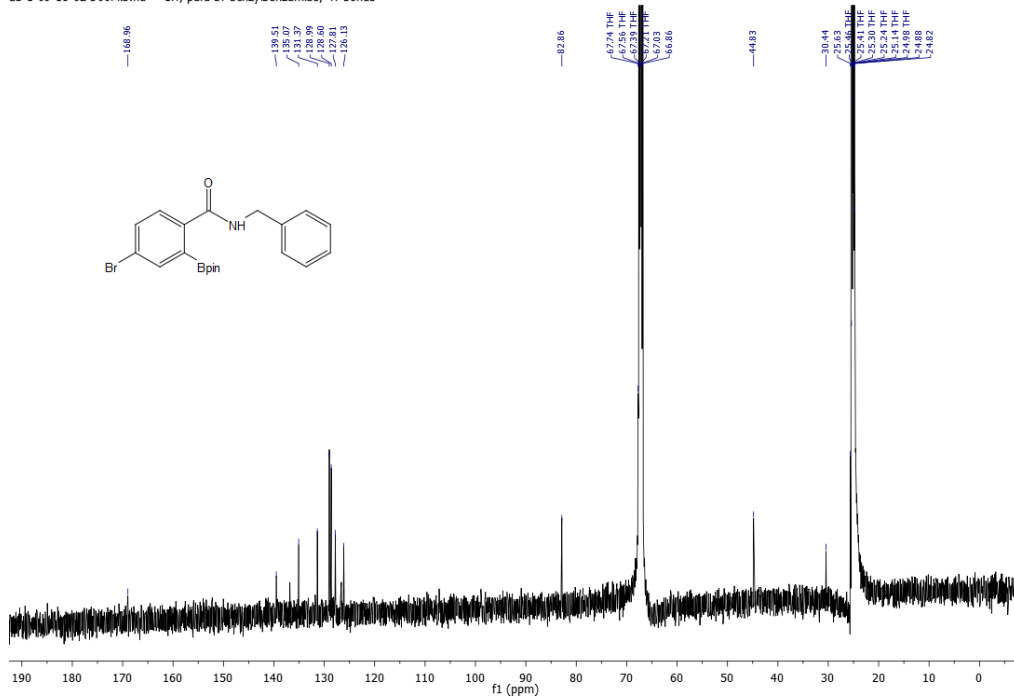Figure S133.  $^{13}\text{C}$  NMR spectra of borylated aromatic amide **24so**

## SUPPORTING INFORMATION

SB-20-05-19-03-methylester-benzamide-bpin-500M.3.fid — 1H-2

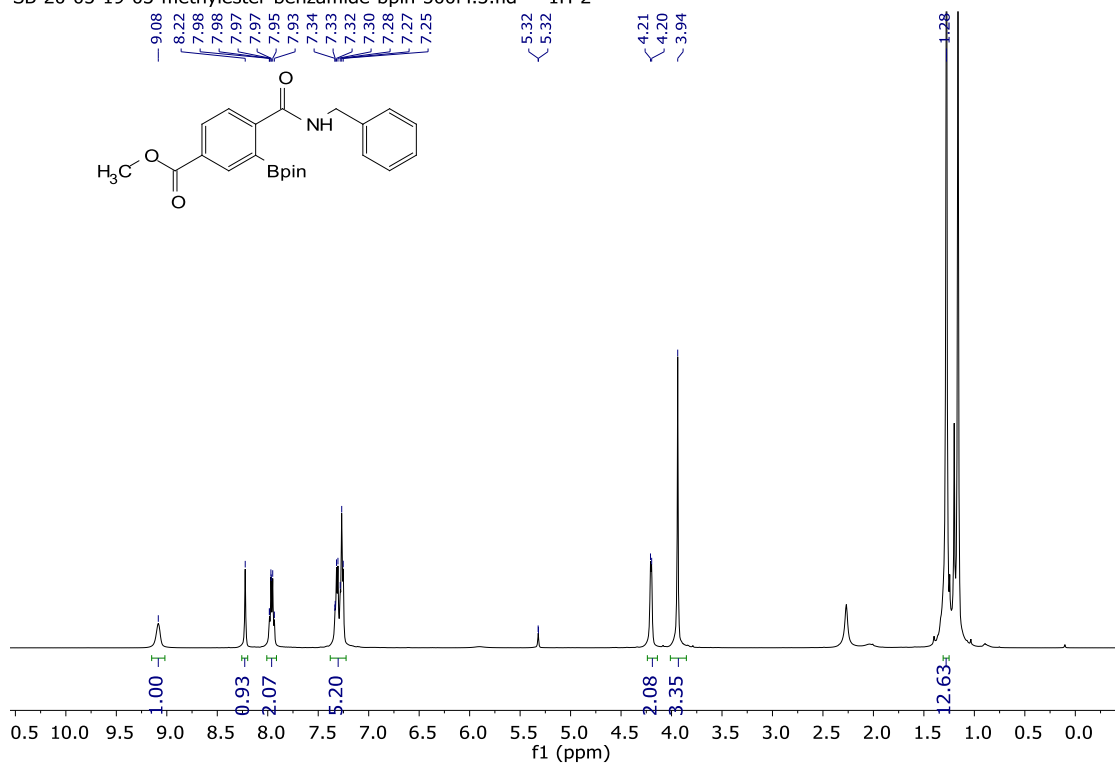Figure S134. <sup>1</sup>H NMR spectra of borylated aromatic amide **25so**

SB-28-05-17-01-06-500M.3.fid — 1H, para-ester benzamide, H-bonds, thf

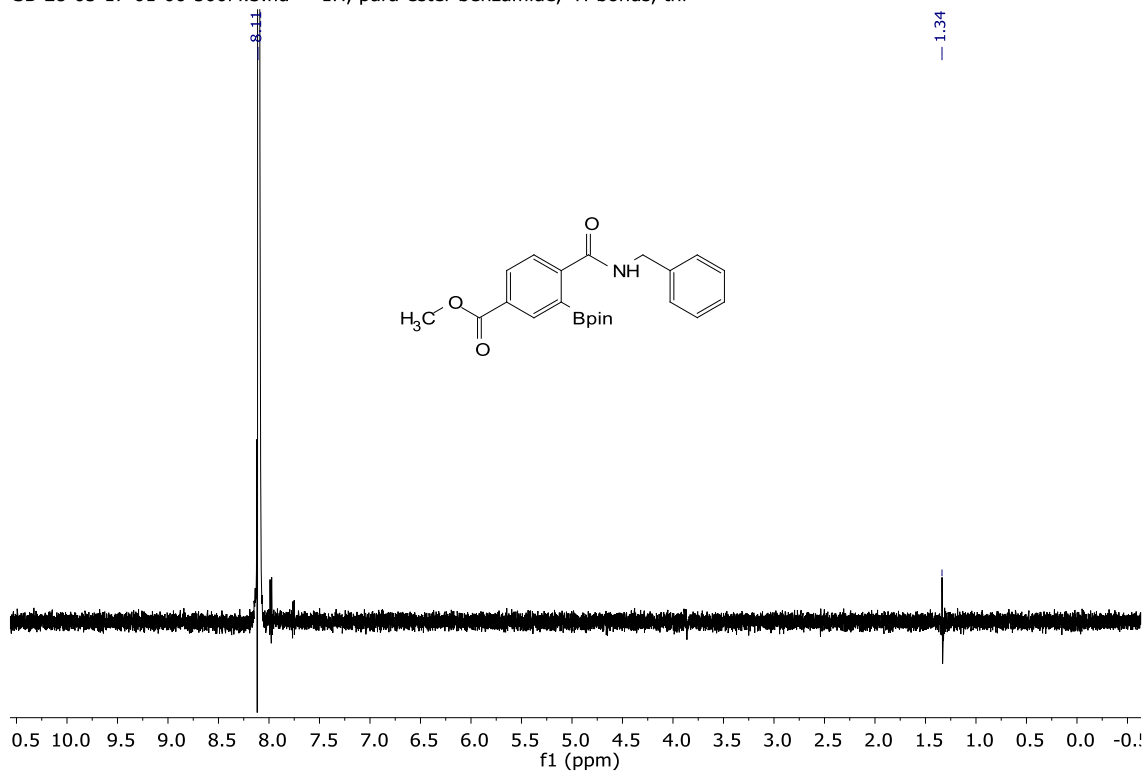Figure S135. <sup>1</sup>H-<sup>1</sup>H 1D NOESY NMR spectra of borylated aromatic amide **25so**

## SUPPORTING INFORMATION

SB-20-05-19-03-methylester-benzamide-bpin-500M.4.fid — 13C-2

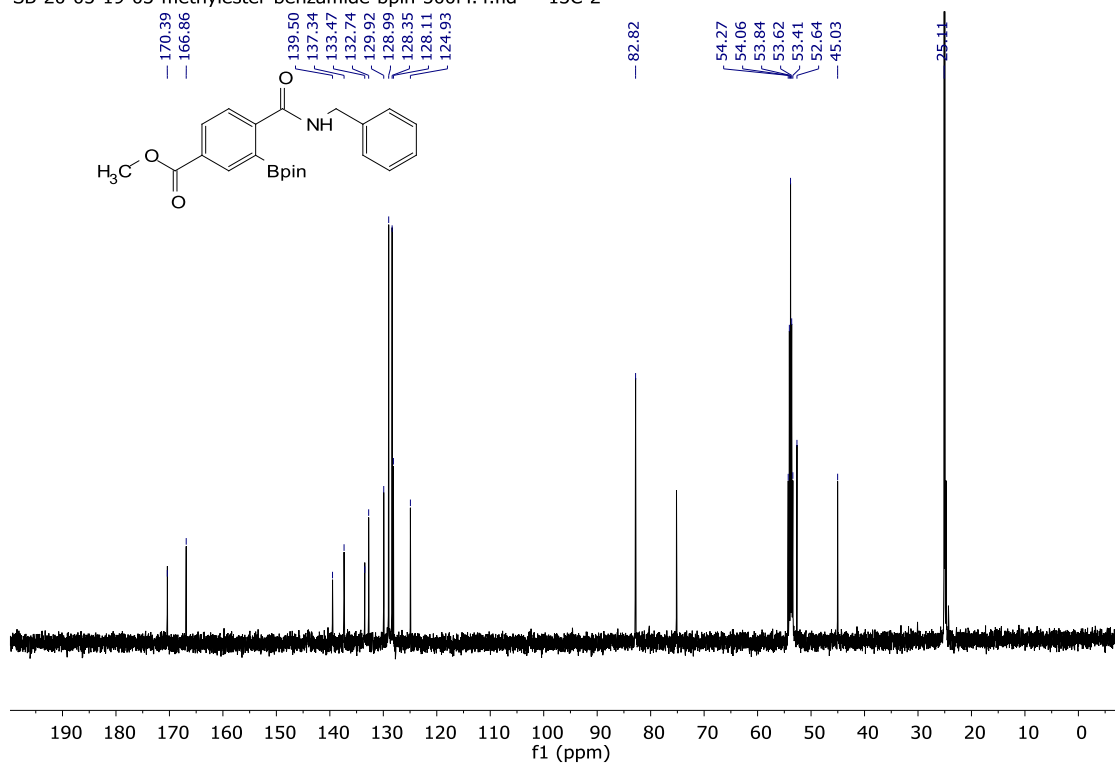Figure S136.  $^{13}\text{C}$  NMR spectra of borylated aromatic amide **25so**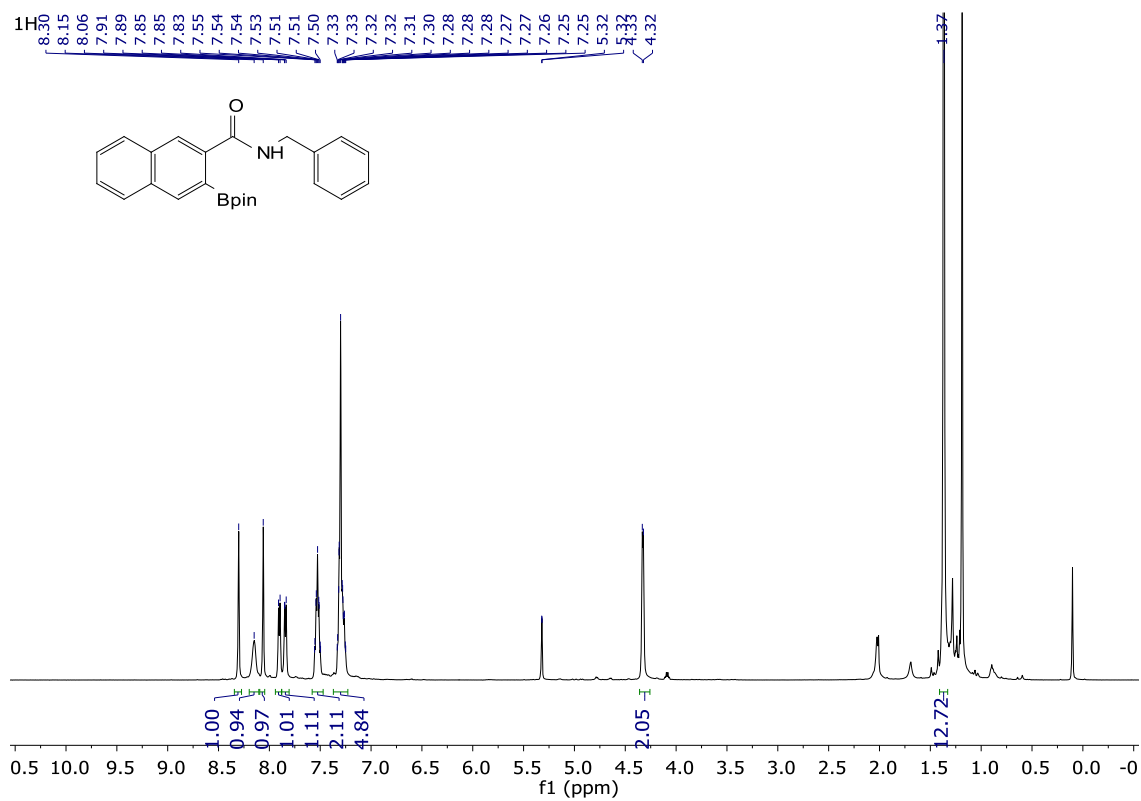Figure S137.  $^1\text{H}$  NMR spectra of borylated aromatic amides **26so**

## SUPPORTING INFORMATION

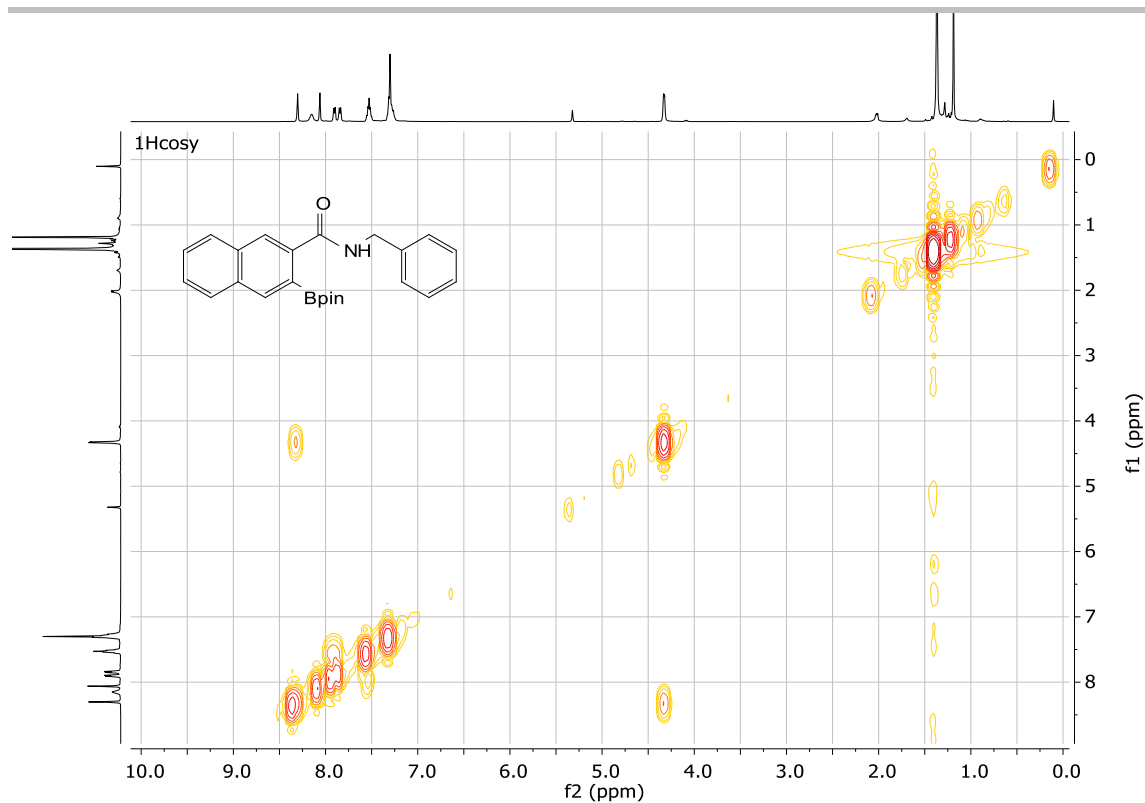Figure S138.  $^1\text{H}$ - $^1\text{H}$  COSY NMR spectra of borylated aromatic amides **26so**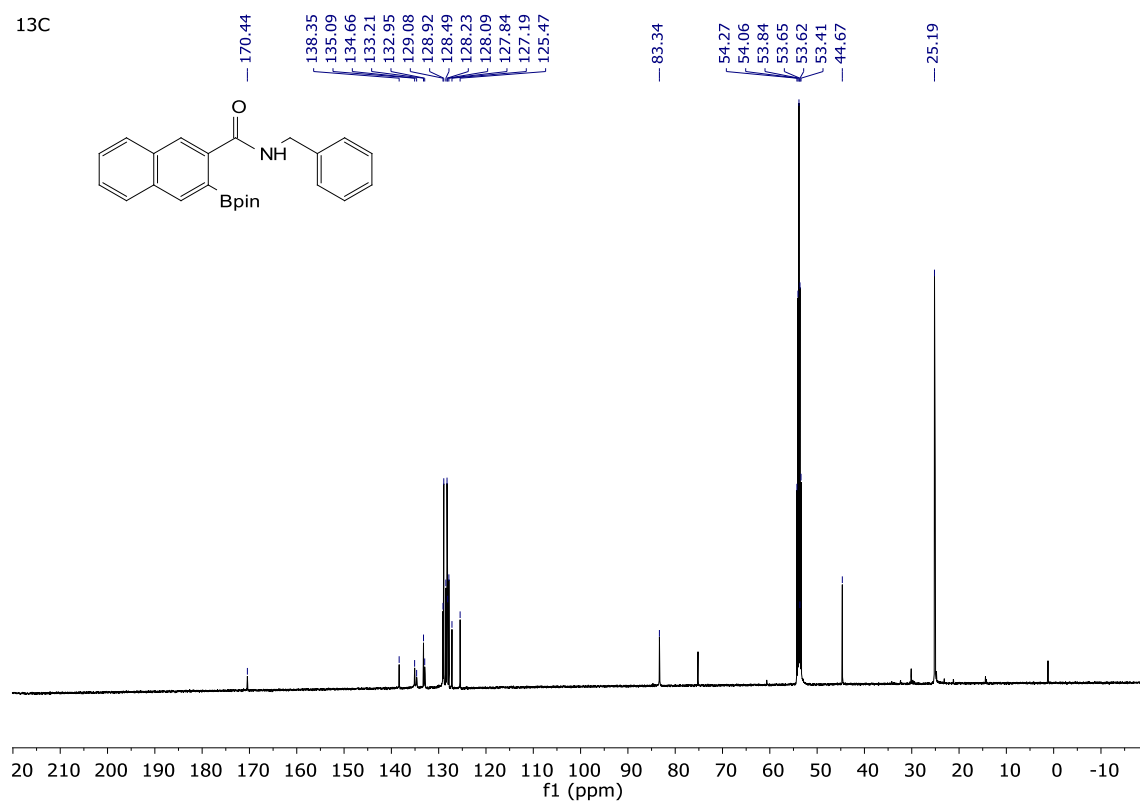Figure S139.  $^{13}\text{C}$  NMR spectra of borylated aromatic amides **26so**

## SUPPORTING INFORMATION

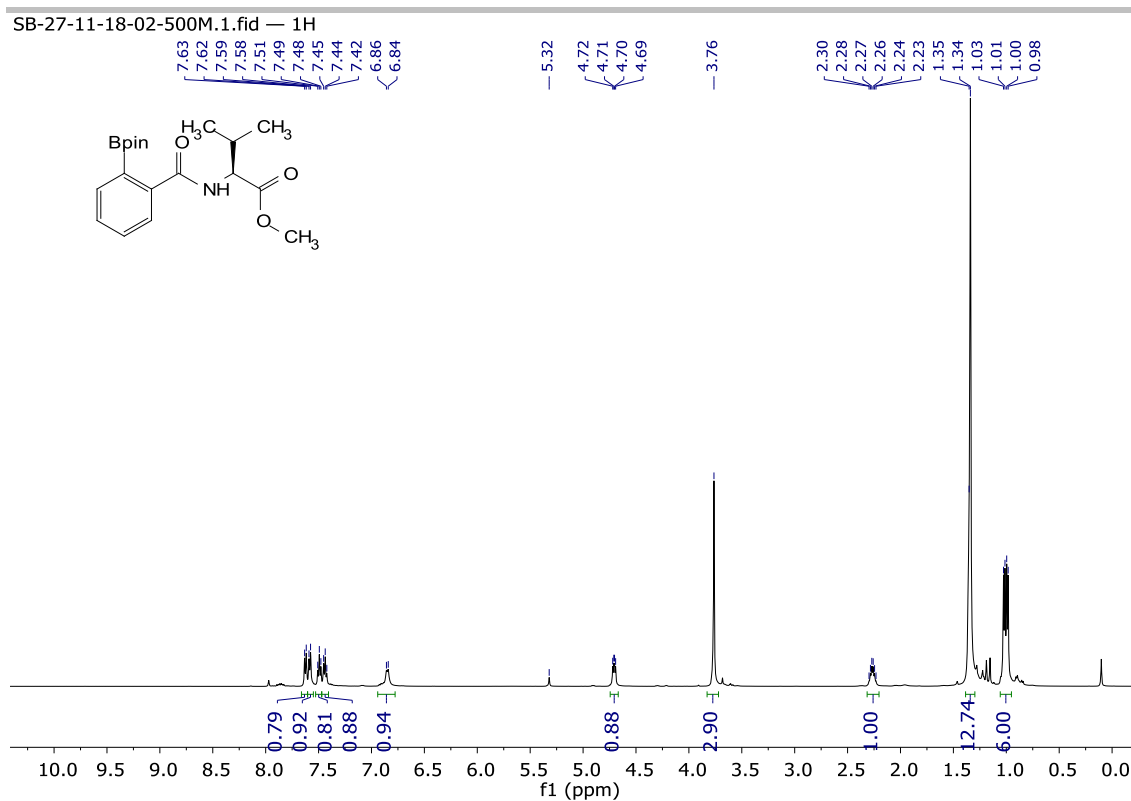Figure S140.  $^1\text{H}$  NMR spectra of borylated aromatic amides **27so**

SB-27-11-18-02-500M.2.ser — 1Hcosy

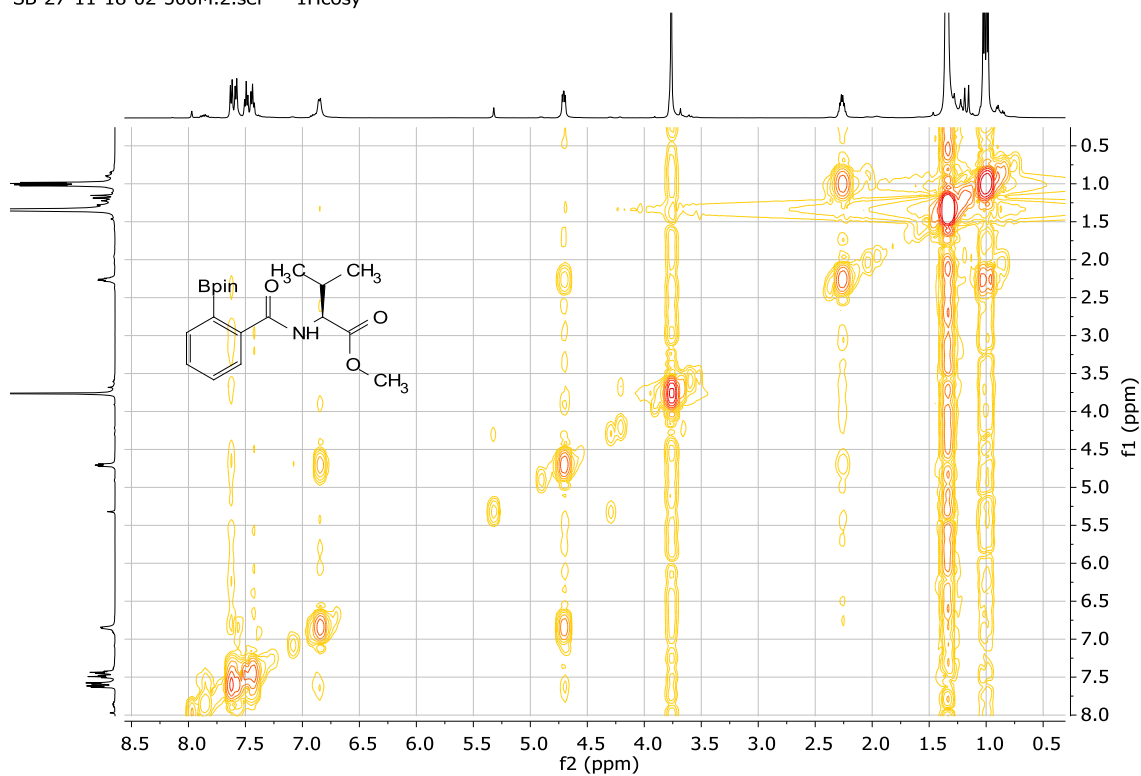Figure S141.  $^1\text{H}$ - $^1\text{H}$  COSY NMR spectra of borylated aromatic amides **27so**



## SUPPORTING INFORMATION

SB-27-11-18-02-500M.3.fid — 13C

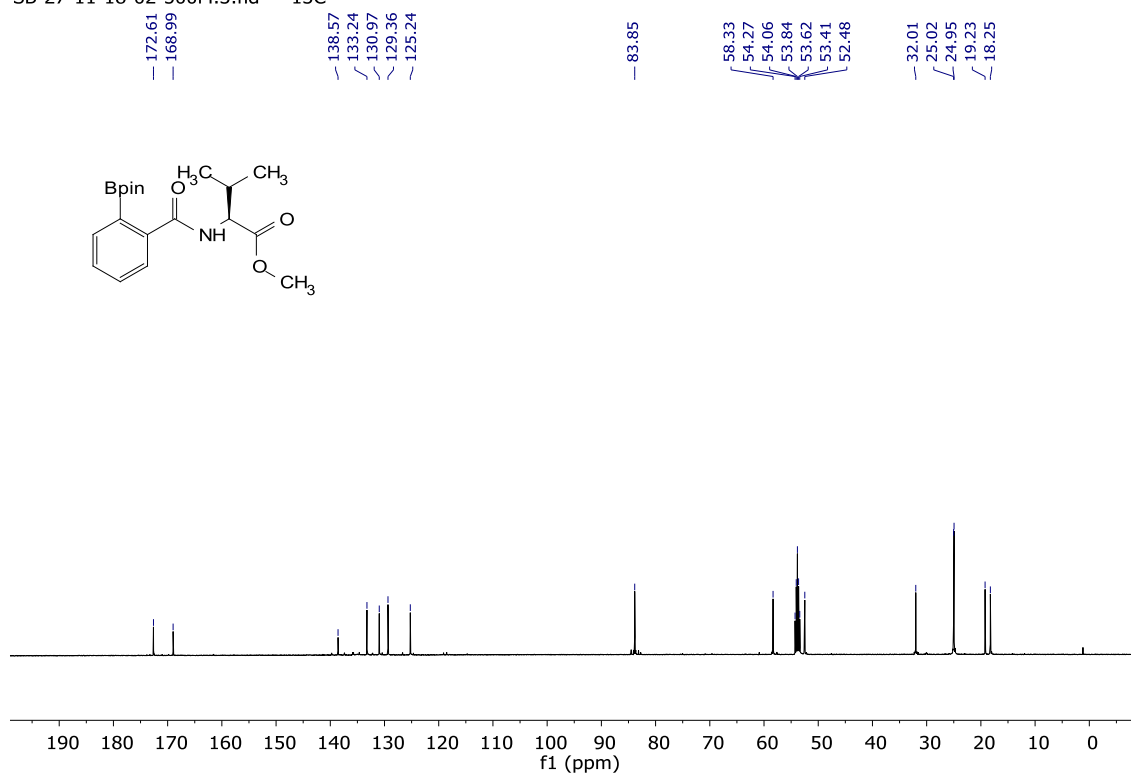Figure S142. <sup>13</sup>C NMR spectra of borylated aromatic amides **27so**

SB-28-05-17-01-08-500M.1.fid — 1H, thioen benzamide, H-bonds

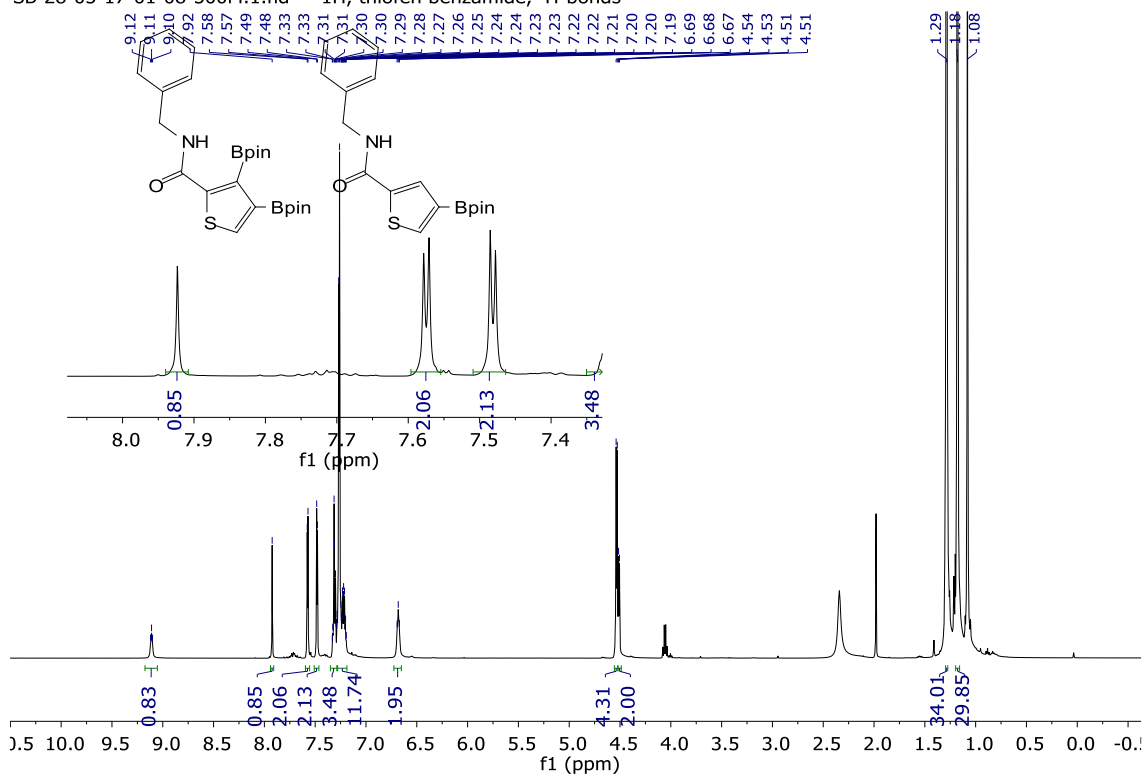Figure S143. <sup>1</sup>H NMR spectra of borylated aromatic amides **28so** and **28sm** (1:2 ratio)

## SUPPORTING INFORMATION

SB-28-05-17-01-08-500M.5.ser — <sup>1</sup>H, thiofen benzamide, H-bonds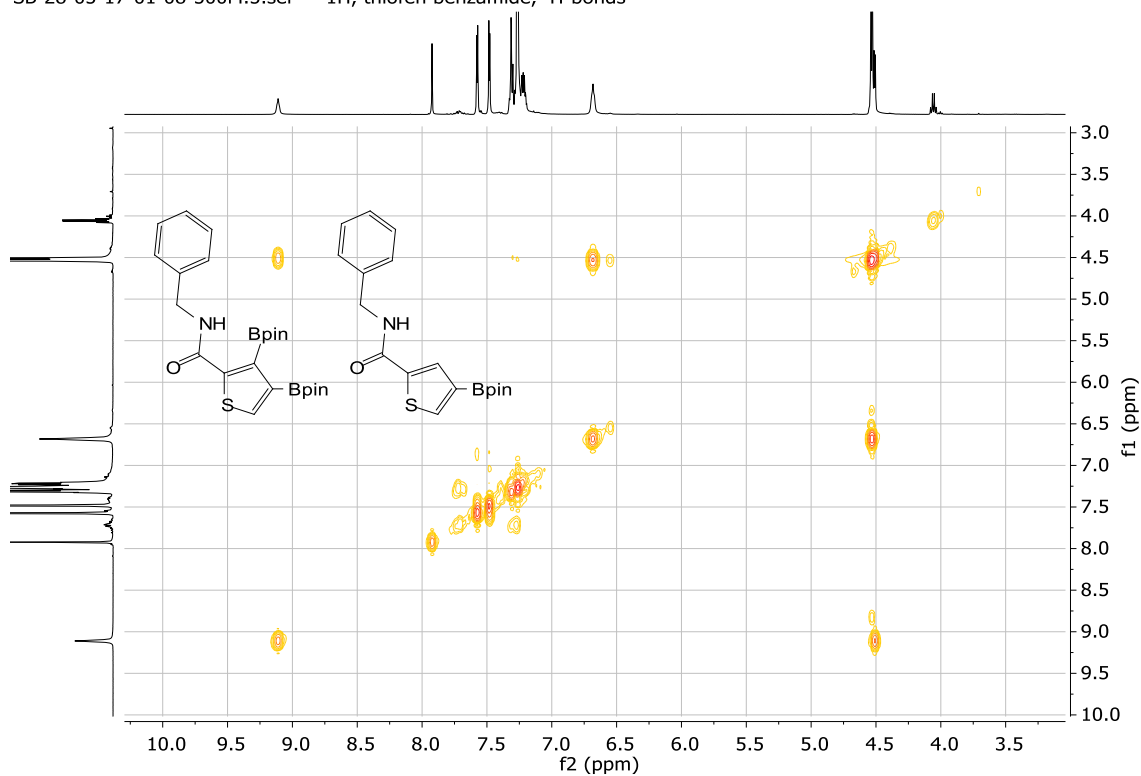Figure S144. <sup>1</sup>H-<sup>1</sup>H COSY NMR spectra of borylated aromatic amides **28so** and **28sm** (1:2 ratio)SB-28-05-17-01-08-500M.3.fid — <sup>13</sup>C, thiofen benzamide, H-bonds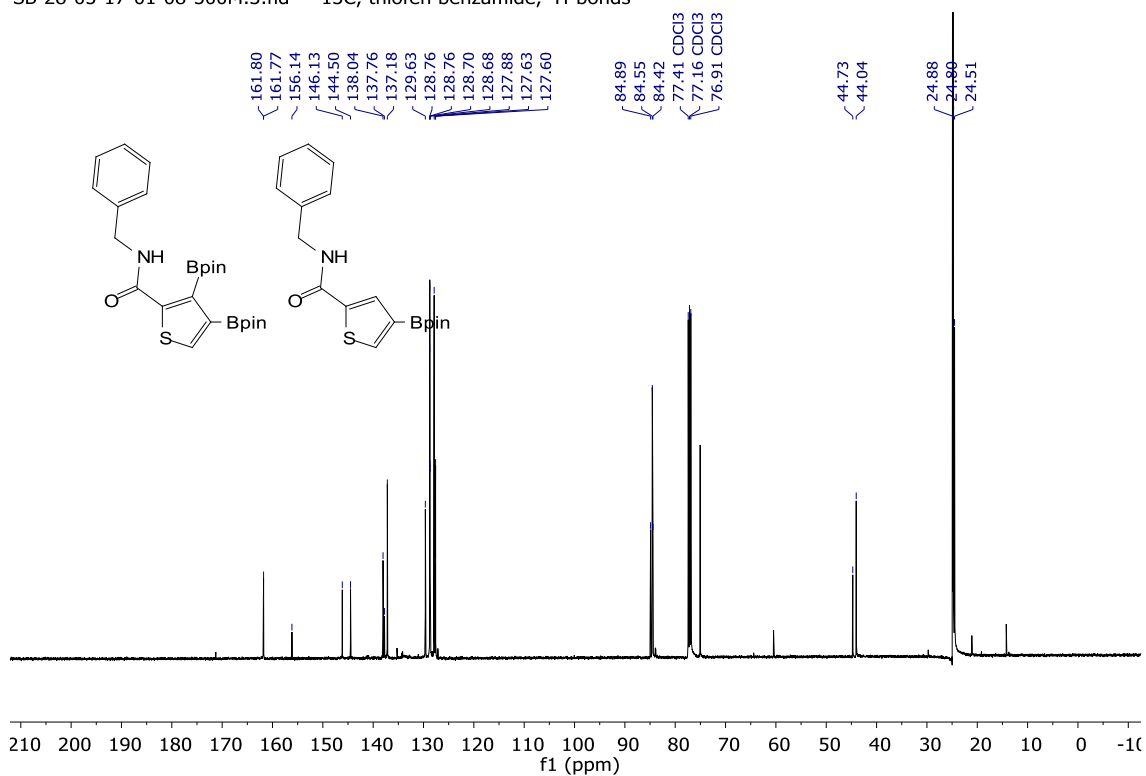Figure S145. <sup>13</sup>C NMR spectra of borylated aromatic amides **28so** and **28sm** (1:2 ratio)

## SUPPORTING INFORMATION

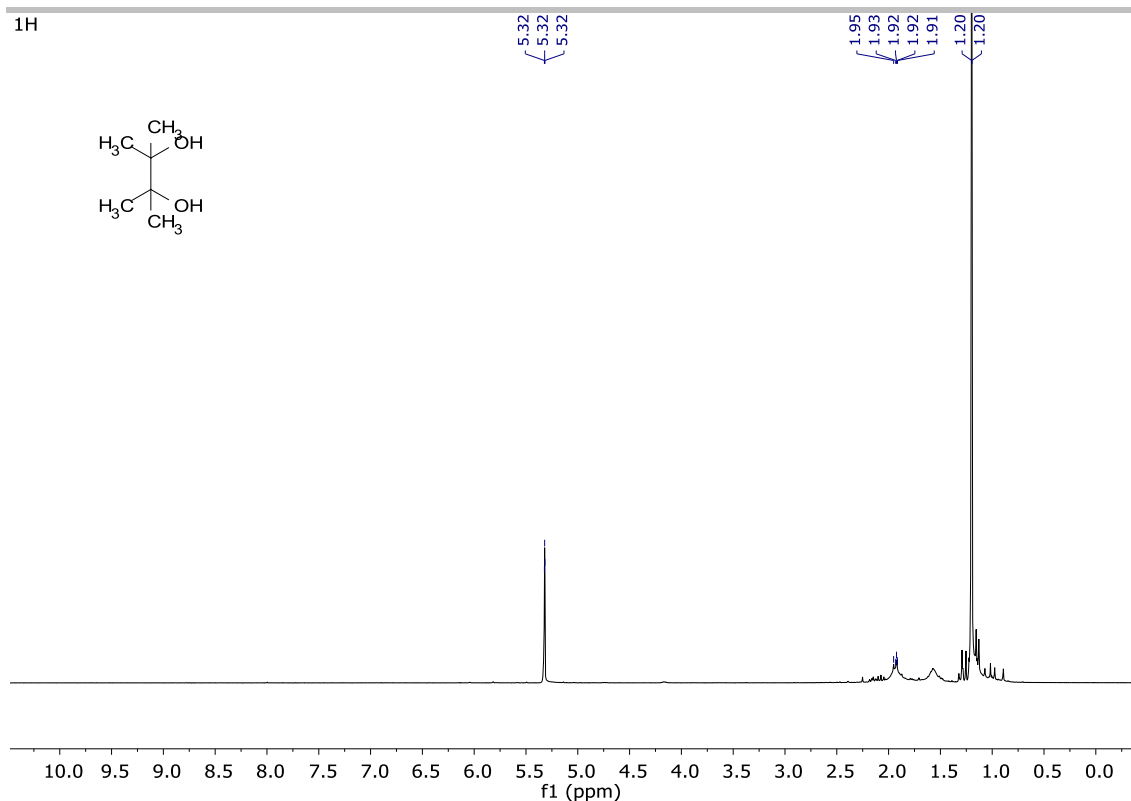Figure S146. <sup>1</sup>H NMR spectra of pinacol

## References

- [1] Polin, J.; Schmolke, E.; Balzani, V. *Synthesis (Stuttg)*. **1998**, *1998* (03), 321–324.
- [2] Polin, J.; Schmolke, E.; Balzani, V. *Synthesis (Stuttg)*. **1998**, *1998* (03), 321–324.
- [3] R. Ahlrichs. In *Turbomole Version 6.5*; University of Karlsruhe: Theoretical Chemistry Group, 2013.
- [4] Baker, J. *J. Comput. Chem.* **1986**, *7* (4), 385–395.
- [5] Truhlar, D. G. *J. Comput. Chem.* **2009**, *28* (1), 73–86.
- [6] Perdew, J. P. *Phys. Rev. B* **1986**, *33* (12), 8822–8824.
- [7] Becke, A. D. *Phys. Rev. A* **1988**, *38* (6), 3098–3100.
- [8] Sierka, M.; Hogekamp, A.; Ahlrichs, R. *J. Chem. Phys.* **2003**, *118* (20), 9136–9148.
- [9] Schäfer, A.; Huber, C.; Ahlrichs, R. *J. Chem. Phys.* **1994**, *100* (8), 5829–5835.
- [10] Y. Jo, J. Ju, J. Choe, K. H. Song, S. Lee, *J. Org. Chem.* **2009**, *74*, 6358–6361.
- [11] T. Kumagai, T. Anki, T. Ebi, A. Konishi, K. Matsumoto, H. Kurata, T. Kubo, K. Katsumoto, C. Kitamura, T. Kawase, *Tetrahedron* **2010**, *66*, 8968–8973.
- [12] J.-J. Y.-D. D.-H. Y.-J. H.-K. S.-G. S.-D. W.-S. Y.-J. Kim, *Bull. Korean Chem. Soc.* **2004**, *25*, 501–505.
- [13] L. U. Nordstrøm, H. Vogt, R. Madsen, *J. Am. Chem. Soc.* **2008**, *130*, 17672–17673.
- [14] X. Cui, Y. Zhang, F. Shi, Y. Deng, *Chem. - A Eur. J.* **2011**, *17*, 1021–1028.
- [15] M. Kunishima, Y. Watanabe, K. Terao, S. Tani, *European J. Org. Chem.* **2004**, *2004*, 4535–4540.
- [16] S. De Sarkar, A. Studer, *Org. Lett.* **2010**, *12*, 1992–1995.
- [17] T. Suzuki, M. N. A. Khan, H. Sawada, E. Imai, Y. Itoh, K. Yamatsuta, N. Tokuda, J. Takeuchi, T. Seko, H. Nakagawa, et al., *J. Med. Chem.* **2012**, *55*, 5760–5773.
- [18] N. Wang, X. Zou, J. Ma, F. Li, *Chem. Commun.* **2014**, *50*, 8303–8305.
- [19] W.-J. Yoo, C.-J. Li, *J. Am. Chem. Soc.* **2006**, *128*, 13064–13065.
- [20] P. Liu, J. Tang, X. Zeng, *Org. Lett.* **2016**, *18*, 5536–5539.
- [21] T. K. Hyster, T. Rovis, *J. Am. Chem. Soc.* **2010**, *132*, 10565–10569.

## SUPPORTING INFORMATION

- [22] Liu, Y.; Laufer, R.; Patel, N. K.; Ng, G.; Sampson, P. B.; Li, S.-W.; Lang, Y.; Feher, M.; Brokx, R.; Beletskaya, I.; Hodgson, R.; Plotnikova, O.; Awrey, D. E.; Qiu, W.; Chirgadze, N. Y.; Mason, J. M.; Wei, X.; Lin, D. C.-C.; Che, Y.; Kiarash, R.; Fletcher, G. C.; Mak, T. W.; Bray, M. R.; Pauls, H. W. *ACS Med. Chem. Lett.* **2016**, *7* (7), 671–675.
- [23] Velcicky, J.; Feifel, R.; Hawtin, S.; Heng, R.; Huppertz, C.; Koch, G.; Kroemer, M.; Moebitz, H.; Revesz, L.; Scheufler, C.; Schlapbach, A. *Bioorg. Med. Chem. Lett.* **2010**, *20* (3), 1293–1297.
- [24] Dzyuba, E. V.; Baytekin, B.; Sattler, D.; Schalley, C. A. *Eur. J. Org. Chem.* **2012**, *2012* (6), 1171–1178.
- [25] Heightman, T. D.; Berdini, V.; Braithwaite, H.; Buck, I. M.; Cassidy, M.; Castro, J.; Courtin, A.; Day, J. E. H.; East, C.; Fazal, L.; Graham, B.; Griffiths-Jones, C. M.; Lyons, J. F.; Martins, V.; Muench, S.; Munck, J. M.; Norton, D.; O'Reilly, M.; Palmer, N.; Pathuri, P.; Reader, M.; Rees, D. C.; Rich, S. J.; Richardson, C.; Saini, H.; Thompson, N. T.; Wallis, N. G.; Walton, H.; Wilsher, N. E.; Woolford, A. J.-A.; Cooke, M.; Cousin, D.; Onions, S.; Shannon, J.; Watts, J.; Murray, C. W. *J. Med. Chem.* **2018**, *61* (11), 4978–4992.
- [26] Marques, C. S.; Peixoto, D.; Burke, A. J. *RSC Adv.* **2015**, *5* (26), 20108–20114.
